# Supplementary material
Source: PubMed Central journal article supplement (PMC2792916)

# Palladium-Catalyzed Enantioselective Addition of Two Distinct Nucleophiles across Alkenes Capable of Quinone Methide Formation

## Supporting Information

### Table of Contents

|                                                                                                                        |              |
|------------------------------------------------------------------------------------------------------------------------|--------------|
| General information                                                                                                    | Page 2       |
| Substrate synthesis                                                                                                    | Pages 2-7    |
| Procedure for optimization                                                                                             | Pages 7-10   |
| Substrate scope                                                                                                        | Pages 10-16  |
| Inverse electron demand Diels-Alder reaction                                                                           | Pages 16-17  |
| Determination of enantiomeric ratio                                                                                    | Pages 18-27  |
| Dearomatization of phenol                                                                                              | Page 28      |
| Mosher ester analysis                                                                                                  | Page 29      |
| Derivatization of Diels Alder product via Jones oxidation                                                              | Page 30      |
| Synthesis of Pd(( <i>S</i> )- <i>i</i> PrQuinox)Cl <sub>2</sub> and Cu(( <i>S</i> )- <i>i</i> PrQuinox)Cl <sub>2</sub> | Page 31      |
| X-ray data                                                                                                             | Pages 32-62  |
| References                                                                                                             | Page 63      |
| NMR Spectra                                                                                                            | Pages 64-119 |

**General Information:** Unless otherwise noted, all reactions were performed under a nitrogen atmosphere with stirring. Toluene, dichloromethane, dichloroethane and THF were dried before use by passing through a column of activated alumina. Methanol was distilled from magnesium methoxide. Triethylamine was distilled from CaH<sub>2</sub>. 3Å molecular sieves were powdered and activated by flame heating under vacuum (ca. 3 min). *n*-Butanol, *n*-Butenol and ethelenglycol monomethylether were purified by distillation from MgSO<sub>4</sub>. All other reagents were purchased from commercial sources and used without further purification. Yields were calculated for material judged homogeneous by thin-layer chromatography and NMR. Thin-layer chromatography was performed with EMD silica gel 60 F254 plates eluting with the solvents indicated, visualized by a 254 nm UV lamp, or stained either with potassium permanganate, *p*-anisaldehyde, phosphomolybdic acid, or ninhydrin. Flash column chromatography was performed with EcoChrom MP Silitech 32-63D 60Å silica gel, or with Brockmann I activated basic alumina (pH 9-10), slurry packed with solvents indicated in glass columns. Nuclear magnetic resonance spectra were acquired at 300, 400, or 500 MHz for <sup>1</sup>H, and 75, 100, or 125 MHz for <sup>13</sup>C. Chemical shifts for proton nuclear magnetic resonance (<sup>1</sup>H NMR) spectra are reported in parts per million downfield relative to the line of CHCl<sub>3</sub> singlet at 7.26 ppm. Chemical shifts for carbon nuclear magnetic resonance (<sup>13</sup>C NMR) spectra are reported in parts per million downfield relative to the center-line of the CDCl<sub>3</sub> triplet at 77.23 ppm. The abbreviations s, d, t, dd, td, ddd, and m stand for the resonance multiplicities singlet, doublet, triplet, doublet of doublets, triplet of doublets, doublet of doublets of doublets, and multiplet, respectively. Optical rotations were obtained (Na D line) using a Perkin Elmer Model 343 Polarimeter fitted with a micro cell with a 1 dm path length; concentrations are reported in g/100 mL. IR spectra were recorded using a Nicolet FTIR instrument. GC (gas chromatography) analysis was performed using a Hewlett Packard HP 6890 Series GC system fitted with a HP-Chiral permethylated β-cyclodextrin column. HPLC (high pressure liquid chromatography) analysis was performed using a Hewlett Packard Series 1100 instrument fitted with a chiral stationary phase (as indicated). SFC (supercritical fluid chromatography) analysis was performed at 40 °C, using a Thar instrument fitted with a chiral stationary phase (as indicated). HRMS (high resolution mass spectrometry) analysis was performed using Waters LCP Premier XE. Glassware for all reactions was oven-dried at 110 °C and cooled in a dry atmosphere prior to use.

### Substrate Synthesis:

#### Synthesis of 2 and S3:

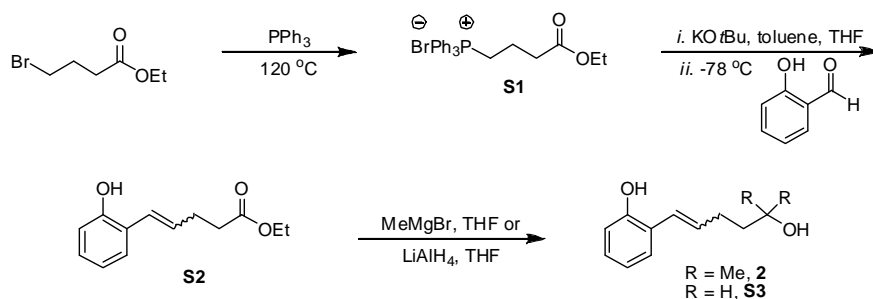

### Preparation of (4-ethoxy-4-oxobutyl)triphenylphosphonium bromide (S1):

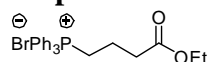 To a 500 mL oven dried round bottom flask equipped with a stir bar was added 38.0 g of triphenylphosphine (145 mmol, 1.41 equiv.) and 20.0 g of ethyl-4-bromobutanoate (102 mmol, 1.00 equiv.) under a nitrogen atmosphere. The flask was then fitted with condenser and the reaction mixture was heated to 120 °C for 16 h. The reaction mixture was then allowed to cool to room temperature then 20 mL of CH<sub>2</sub>Cl<sub>2</sub> was added and it was sonicated for 1 h. To this diethyl ether was added until no further precipitation of product was observed. The precipitate was filtered and rinsed with 100 mL ether to give **2** in quantitative yield. *The product was dried under vacuum at 100 °C for 10 h immediately prior to use.*

The <sup>1</sup>H NMR spectrum matched with previously reported <sup>1</sup>H NMR.<sup>1</sup>

### Preparation of ethyl 5-(2-hydroxyphenyl)pent-4-enoate (S2):

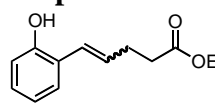 To an oven-dried 500 mL round bottom flask equipped with a stir bar was added 23.4 g of **S1** (51.0 mmol, 2.30 equiv.) and 200 mL toluene. To this was added a solution of 5.80 g KO<sup>t</sup>Bu (51.2 mmol, 2.33 equiv.) in 40 mL of THF dropwise *via* cannulation. The reaction mixture slowly turned a deep red color over 4 h. The mixture was cooled to -78 °C and 2.70 g of salicylaldehyde (22.2 mmol, 1.00 equiv.), dissolved in 20 mL of toluene was added dropwise *via* cannulation. The mixture was allowed to slowly warm to ambient temperature and stirred 48 hours then quenched with 50 mL of saturated NH<sub>4</sub>Cl solution. The mixture was diluted with 100 mL of diethyl ether and washed with 100 mL (2 x 50 mL) of water and 60 mL of brine. The organic layer was dried over MgSO<sub>4</sub>, filtered, and the solvent removed *in vacuo*. The crude mixture was purified by flash silica-gel column chromatography with 10%-20% EtOAc/Hexanes as eluent to give 4.15 g of **S2** (85% yield, average of two reactions). Isomeric ratio (E/Z): 10:1, Major isomer: R<sub>f</sub> = 0.52 w/ 33% EtOAc/Hexane, colorless oil, <sup>1</sup>H-NMR (300 MHz, CDCl<sub>3</sub>) δ = 7.02-7.28 (m, 2 H), 6.85-6.95 (m, 2 H), 6.38-6.48 (d, *J* = 11.2 Hz, 2 H), 5.89 (s, 1 H), 5.74-5.86 (m, 1 H), 4.08-4.16 (m, 2 H), 2.37-2.48 (m, 4 H), 1.18-1.29 (m, 3 H). <sup>13</sup>C-NMR {<sup>1</sup>H} (75 MHz, CDCl<sub>3</sub>) δ = 173.3, 153.1, 134.4, 129.9, 128.8, 125.1, 123.8, 120.5, 116.1, 60.9, 33.9, 24.3, 14.3. IR 3392, 2981, 1705, 1450, 1269, 1195, 1154, 754 cm<sup>-1</sup>. HRMS C<sub>13</sub>H<sub>16</sub>O<sub>3</sub> (M+Na)<sup>+</sup> calcd. 243.0997, obsvd. 243.0996.

### Preparation of 2-(5-hydroxy-5-methylhex-1-enyl)phenol (**2**):

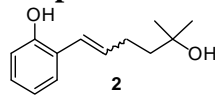 To an oven dried 500 mL round bottom flask equipped with a stir bar was added 4.10 g of **S2** (18.6 mmol, 1.00 equiv.) in 180 mL THF. To this was slowly added a solution of 3.0 M MeMgBr (130 mmol, 7.00 equiv.) at 0 °C. The reaction mixture was then allowed to warm to room temperature and was stirred for 12 h. The reaction was quenched by the slow addition of 20 mL of 1 M HCl solution. The mixture was diluted with 50 mL of diethyl ether and washed with 100 mL (2 x 50 mL) of water and 60 mL of brine. The organic extract was dried over MgSO<sub>4</sub>, filtered, and the solvent was removed *in vacuo*. The crude mixture was purified by flash silica-gel column chromatography with 1 L of 50% Hexane/EtOAc as eluent to give 3.34 g of **2** in 87% yield. Isomeric ratio (E/Z): 10:1, Major isomer: R<sub>f</sub> = 0.32 w/ 33% EtOAc/Hexane, colorless solid. MP = 74-75 °C. <sup>1</sup>H-NMR (400 MHz, CDCl<sub>3</sub>): δ 7.28-7.07 (m, 2 H), 6.95-6.87 (m, 2 H), 6.40-6.37 (d, *J* = 10.9 Hz), 5.95-5.88 (m, 1 H),

5.34 (s, 1 H), 2.28-2.19 (m, 2 H), 1.67-1.57 (m, 2 H), 1.19 (s, 6 H).  $^{13}\text{C-NMR}$   $\{^1\text{H}\}$  (100 MHz,  $\text{CDCl}_3$ ):  $\delta$  152.9, 137.0, 129.8, 128.8, 123.9, 123.4, 120.4, 115.5, 71.3, 43.3, 29.4, 24.1. IR 3410, 3013, 2971, 1604, 1448, 1377, 1261, 1210, 1147, 1131, 904, 755  $\text{cm}^{-1}$ . HRMS  $\text{C}_{13}\text{H}_{18}\text{O}_2$  ( $\text{M}+\text{Na}$ ) $^+$  calcd. 229.1204, obsvd. 229.1201.

### Preparation of (E)-2-(5-hydroxy-pent-1-enyl)phenol (S3):

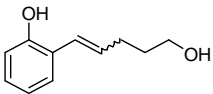 To a 100 mL oven dried round bottom flask equipped with a stir bar was added 1.6 g **S2** (7.27 mmol, 1 equiv.) followed by 40 mL THF under a nitrogen atmosphere. The reaction mixture was cooled to 0 °C. To this was added 544 mg  $\text{LiAlH}_4$  portion wise (14.5 mmol, 2 equiv.). The reaction mixture was allowed to slowly warm to ambient temperature and stirred overnight. The reaction mixture was cooled to 0 °C, and quenched by the sequential addition of 544  $\mu\text{L}$  of water, 544  $\mu\text{L}$  15% NaOH, and 1630  $\mu\text{L}$  water. The reaction mixture was warmed to room temperature,  $\text{MgSO}_4$  was added, and the mixture was stirred for 15 min and then filtered. The filtrate was concentrated *in vacuo* and the crude mixture was purified by silica gel column chromatography with 1:3 EtOAc:Hexanes to give 777 mg of **S3** (60% yield, average of two reactions). Isomeric ratio (E/Z): 10:1, Major isomer:  $R_f = 0.20$  w/ 33% EtOAc/Hexanes, white solid. MP = 45-47 °C.  $^1\text{H-NMR}$  (300 MHz,  $\text{CDCl}_3$ )  $\delta = 7.06$ -7.21 (m, 2 H), 6.83-6.94 (m, 2 H), 6.38-6.46 (d,  $J = 11.2$  Hz, 1 H), 5.82-5.95 (m, 1 H), 3.59-3.68 (t,  $J = 6.4$  Hz, 2 H), 2.17-2.25 (m, 2 H), 1.62-1.74 (m, 2 H).  $^{13}\text{C-NMR}$   $\{^1\text{H}\}$  (75 MHz,  $\text{CDCl}_3$ )  $\delta = 135.9$ , 130.0, 128.8, 124.1, 120.4, 115.6, 62.7, 32.1, 25.5. IR 3404, 2938, 2881, 1604, 1448, 1358, 1269, 1225, 1036, 841  $\text{cm}^{-1}$ . HRMS  $\text{C}_{11}\text{H}_{14}\text{O}_2$  ( $\text{M}+\text{Na}$ ) $^+$  calcd. 201.0886, obsvd. 201.0886.

### Synthesis of S8:

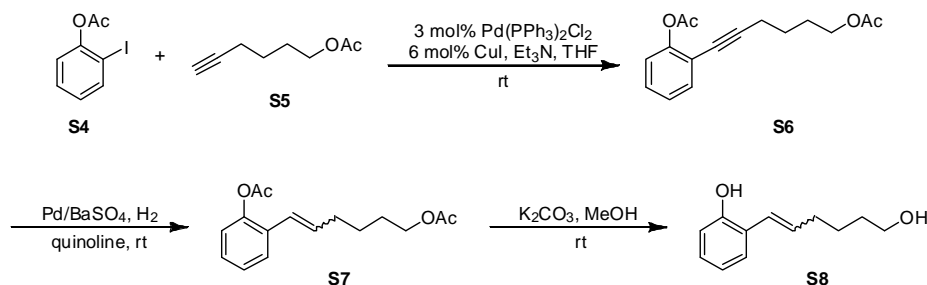

**S4**,<sup>2</sup> **S5**,<sup>3</sup> and  $\text{Pd}(\text{PPh}_3)_2\text{Cl}_2$ <sup>4</sup> were prepared according to literature procedure.

### Synthesis of 2-(6-acetoxyhex-1-ynyl)phenyl acetate (S6):

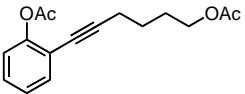 To an oven-dried 100 mL Schlenk flask was added 2.096 g of **S4** (8.000 mmol, 1 equiv.) and 40 mL of triethylamine. The solution was degassed by 2 cycles of freeze-pump-thaw. To a second oven-dried Schlenk flask was added 1.256 g of **S5** (8.96 mmol, 1.120 equiv.), 20 mL of triethylamine and 40 mL of THF. The solution was degassed by 2 cycles of freeze-pump-thaw. To an oven-dried 250 mL round bottom flask equipped with stir bar was added 169 mg of  $\text{Pd}(\text{PPh}_3)_2\text{Cl}_2$  (0.240 mmol, 0.0300 equiv.) and 91.4 mg of CuI (0.480 mmol, 0.0600 equiv.). The solutions of **S4** and **S5** were sequentially cannulated into the



flask containing the catalysts. The reaction mixture was then stirred at rt overnight. The reaction mixture was diluted with 50 mL of diethyl ether and then 50 mL of 1 M HCl was added and the mixture was allowed to stir for 30 min. The organic layer was washed with 50 mL of 1 M HCl (2 x 25 mL) and 20 mL of brine. The organic extract was dried over MgSO<sub>4</sub>, filtered, and the solvent was removed *in vacuo*. The crude mixture was purified by flash silica-gel column chromatography with 10% to 20% Hexane/EtOAc as eluent to give 2.0265 g of **S6** (92.3% yield, average of two reactions). R<sub>f</sub> = 0.20 w/ 20% EtOAc/Hexane, colorless oil, <sup>1</sup>H-NMR (300 MHz, CDCl<sub>3</sub>) δ = 7.44 (dd, *J* = 7.6 Hz, *J* = 1.7 Hz, 1 H), 7.30 (ddd, *J* = 8.0 Hz, *J* = 7.6 Hz, *J* = 1.7 Hz, 1 H), 7.17 (ddd, *J* = 7.6 Hz, *J* = 7.6 Hz, *J* = 1.4 Hz, 1 H), 7.05 (dd, *J* = 8.1 Hz, *J* = 1.4 Hz, 1 H), 4.11 (t, *J* = 6.5 Hz, 2 H), 2.47 (t, *J* = 6.9 Hz, 2 H), 2.33 (s, 3 H), 2.06 (s, 3 H), 1.84-1.76 (m, 2 H), 1.71-1.63 (m, 2 H). <sup>13</sup>C-NMR {<sup>1</sup>H} (75 MHz, CDCl<sub>3</sub>) δ = 171.4, 169.1, 151.7, 133.3, 129.0, 126.1, 122.3, 118.0, 94.7, 76.2, 64.1, 28.0, 25.4, 21.2, 21.1, 19.4. IR: 1761, 1733, 1487, 1366, 1237, 1207, 1180, 1037, 907, 755 cm<sup>-1</sup>. HRMS C<sub>16</sub>H<sub>18</sub>O<sub>4</sub> (M+Na)<sup>+</sup> calcd. 297.1103, obsvd. 297.1097.

#### Synthesis of (*E*)-2-(6-acetoxylhex-1-enyl)phenyl acetate (**S7**):

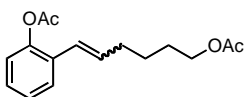

To an oven dried 50 mL Schlenk flask equipped with a stir bar was added 261 mg of 5% Pd/BaSO<sub>4</sub>, 150 μL of quinoline (1.27 mmol, 0.42 equiv.) and 5 mL of MeOH. A three-way joint fitted with a balloon of H<sub>2</sub> was attached and the flask. To a separate, oven-dried 50 mL round bottom flask was added 823 mg of **S6** (3.00 mmol) and 10 mL MeOH. The solution of **S6** is transferred via cannula to the Schlenk flask. An additional 5 mL of MeOH was used for rinsing. The Schlenk flask was evacuated and refilled with H<sub>2</sub> three times. Upon completion as determined by TLC (four days), the reaction mixture was filtered through plug of celite<sup>®</sup> using 50 mL of MeOH. The filtrate was concentrated *in vacuo* and dissolved in 100 mL of dichloromethane, washed with 100 mL 0.2 M HCl (2 x 50 mL) and 50 mL brine, dried over Na<sub>2</sub>SO<sub>4</sub>, filtered, and the solvent was removed *in vacuo*. The crude mixture was purified by flash silica-gel column chromatography with 1:4 EtOAc:Hexanes as eluent to give 576 mg of **S6** as a 10:1 mixture of alkene isomers (75% yield, average of 2 reactions). R<sub>f</sub> = 0.60 w/ 2:3 EtOAc:Hexanes, colorless oil. Major isomer: <sup>1</sup>H-NMR (300 MHz, CDCl<sub>3</sub>) δ = 7.30-7.15 (m, 3 H), 7.08-6.98 (m, 1 H), 6.30 (d, *J* = 11.5 Hz, 1H), 5.72 (ddd, *J* = 14.7 Hz, *J* = 11.5 Hz, *J* = 7.3 Hz, 1 H), 4.03 (t, *J* = 6.6 Hz, 2 H), 2.27 (s, 3 H), 2.21 (ddd, *J* = 14.7 Hz, *J* = 7.4 Hz, *J* = 1.7 Hz, 2 H), 2.06 (s, 3 H), 1.68-1.40 (m, 4 H). <sup>13</sup>C-NMR {<sup>1</sup>H} (75 MHz, CDCl<sub>3</sub>) δ = 171.4, 169.4, 148.6, 134.4, 130.6, 130.5, 128.2, 125.9, 123.9, 122.4, 64.5, 28.4, 28.3, 26.2, 21.2, 21.1. IR: 1762, 1733, 1483, 1448, 1367, 1237, 1197, 1170, 1037, 1010, 912, 760 cm<sup>-1</sup>. HRMS C<sub>12</sub>H<sub>16</sub>O<sub>2</sub> (M+Na)<sup>+</sup> calcd. 299.1254, obsvd. 299.1257.

#### Synthesis of (*E*)-2-(6-hydroxyhex-1-enyl)phenol (**S8**):

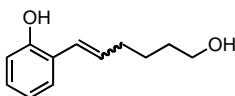

To an oven-dried 50 mL round bottom flask equipped with stir bar was added 300 mg of **S7** (1.09 mmol, 1 equiv.), 300 mg of K<sub>2</sub>CO<sub>3</sub> (2.18 mmol, 2.00 equiv.) and 5 mL of MeOH. The reaction mixture was allowed to stir for 10 h. Upon completion by TLC analysis, the reaction mixture was diluted with 20 mL of dichloromethane and washed with 20 mL of 1 M HCl, 20 mL of water, and 20 mL of brine, dried over Na<sub>2</sub>SO<sub>4</sub>, filtered, and the

solvent was removed *in vacuo*. The crude mixture was purified by flash silica-gel column chromatography with 2:3 EtOAc:Hexanes as eluent to give 188 mg of **S8** as a 10:1 mixture of alkene isomers (83% yield, average of two reactions).  $R_f = 0.45$  w/ 1:1 EtOAc:Hexanes, light yellow oil. Major isomer:  $^1\text{H-NMR}$  (300 MHz,  $\text{CDCl}_3$ )  $\delta = 7.18$ -7.08 (m, 2 H), 6.93-6.84 (m, 2 H), 6.41 (d,  $J = 11.3$  Hz, 1H), 5.86 (dddd,  $J = 11.3$  Hz,  $J = 7.3$  Hz,  $J = 7.3$  Hz,  $J = 1.1$  Hz, 1 H), 5.71 (bs, 1 H), 3.59 (t,  $J = 6.3$  Hz, 2 H), 2.15 (ddd,  $J = 14.6$  Hz,  $J = 7.3$  Hz,  $J = 1.6$  Hz, 2 H), 1.85 (bs, 1 H), 1.64-1.36 (m, 4 H).  $^{13}\text{C-NMR}$   $\{^1\text{H}\}$  (75 MHz,  $\text{CDCl}_3$ )  $\delta = 153.0$ , 136.1, 129.9, 128.7, 124.1, 123.8, 120.3, 115.4, 62.8, 32.2, 28.4, 25.7. IR 3303, 2934, 2859, 1604, 1451, 1228, 1037, 753  $\text{cm}^{-1}$ . HRMS  $\text{C}_{12}\text{H}_{16}\text{O}_2$  (M+Na) $^+$  calcd. 215.1043, obsvd. 215.1058.

### Synthesis of S11:

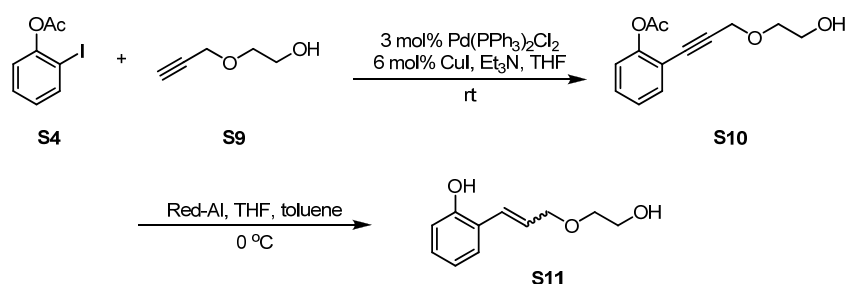

**S4**,<sup>2</sup> **S9**,<sup>5</sup> and  $\text{Pd(PPh}_3)_2\text{Cl}_2$ <sup>4</sup> were prepared according to literature procedure.

### Preparation of 2-(3-(2-hydroxyethoxy)prop-1-ynyl)phenyl acetate (**S10**):

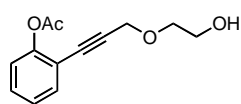

To an oven-dried 100 mL round bottom flask was added 2.90 g of **S4** (11.1 mmol, 1 equiv.), 10 mL of THF, and 10 mL of triethylamine. The solution was degassed by 2 cycles of freeze-pump-thaw. To a second dried round bottom flask was added 1.24 g of **S9** (12.4 mmol, 1.12 equiv.), 10 mL of THF, and 10 mL of triethylamine. The solution was degassed by 2 cycles of freeze-pump-thaw. To an oven-dried round bottom flask equipped with stir bar was added 233 mg of  $\text{Pd(PPh}_3)_2\text{Cl}_2$  (0.332 mmol, 0.0300 equiv.) and 127 mg of  $\text{CuI}$  (0.664 mmol, 0.0600 equiv.). Solutions of **S4** and **S9** were sequentially cannulated into the flask containing the catalysts. The reaction mixture was stirred at rt for 1 h. The reaction mixture was diluted with 50 mL of dichloromethane and washed with 100 mL (2 x 50 mL) of 1 M HCl, 50 mL of saturated  $\text{NH}_4\text{Cl}$ , and 50 mL of brine. The organic phase was dried over  $\text{Na}_2\text{SO}_4$ , filtered, and the solvent was removed *in vacuo*. The crude mixture was purified by flash silica-gel column chromatography with 1:2 EtOAc:Hexanes to 1:1 EtOAc:Hexanes as eluent to give 1.848 g of **S10** (71.3% yield, average of two reactions).  $R_f = 0.20$  w/ 1:1 EtOAc:Hexanes, colorless oil.  $^1\text{H-NMR}$  (300 MHz,  $\text{CDCl}_3$ )  $\delta = 7.49$  (dd,  $J = 7.6$  Hz,  $J = 1.7$  Hz, 1 H), 7.36 (ddd,  $J = 7.6$  Hz,  $J = 7.6$  Hz,  $J = 1.7$  Hz, 1 H), 7.20 (ddd,  $J = 7.6$  Hz,  $J = 7.6$  Hz,  $J = 1.2$  Hz, 1 H), 7.09 (dd,  $J = 8.1$  Hz,  $J = 1.2$  Hz, 1 H), 4.43 (s, 2 H), 3.78 (bdd,  $J = 9.1$  Hz,  $J = 5.2$  Hz, 2 H), 3.70 (m, 2 H), 2.34 (s, 3 H), 2.07 (bs, 1 H).  $^{13}\text{C-NMR}$   $\{^1\text{H}\}$  (75 MHz,  $\text{CDCl}_3$ )  $\delta = 169.2$ , 151.8, 133.4, 130.0, 126.1, 122.5, 116.8, 90.0, 81.7, 71.3, 62.0, 59.3, 21.1. IR 3426, 2935, 1760, 1486, 1446, 1368, 1180, 1102, 1010, 908, 756, 733  $\text{cm}^{-1}$ . HRMS  $\text{C}_{13}\text{H}_{14}\text{O}_4$  (M+Na) $^+$  calcd. 257.0784, obsvd. 257.0789.

### Preparation of 2-(3-(2-hydroxyethoxy)prop-1-enyl)phenol (**S11**):

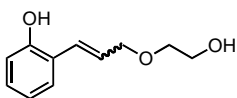

To an oven-dried 50 mL round bottom flask was added 300 mg of **S10** (1.28 mmol, 1 equiv.) and 5 mL THF. The mixture is cooled to 0 °C in an ice bath. In a separate oven-dried round bottom flask 1.6 mL of Red-Al solution (65% by weight in toluene, 5.3 mmol, 4.0 equiv.) was diluted with 5 mL of THF. The solution of Red-Al was transferred dropwise *via* cannula to the reaction mixture. The reaction mixture was stirred at 0 °C for 1 h, and then warmed to rt. To this was slowly added 20 mL of 0.5 M HCl (gas evolution observed) followed by 20 mL of CH<sub>2</sub>Cl<sub>2</sub>. The phases were separated, and the aqueous phase was extracted with 80 mL of dichloromethane (4 x 20 mL). The combined organic phase was washed with brine, dried over Na<sub>2</sub>SO<sub>4</sub>, filtered, and the solvent was removed *in vacuo*. The crude mixture was purified by flash silica-gel column chromatography with 2% MeOH/CH<sub>2</sub>Cl<sub>2</sub> as eluent to give 201 mg of **S11** (1:1 mixture of alkene isomers) (81% yield, average of two reactions).  $R_f = 0.40$  w/ 10% MeOH/CH<sub>2</sub>Cl<sub>2</sub>, colorless oil. <sup>1</sup>H-NMR (300 MHz, CDCl<sub>3</sub>)  $\delta = 7.37$  (dd,  $J = 7.6$  Hz,  $J = 1.7$  Hz, 1 H), 7.19 (dddd,  $J = 7.7$  Hz,  $J = 7.4$  Hz,  $J = 1.6$  Hz,  $J = 0.7$  Hz, 1 H), 7.13 (ddd,  $J = 8.0$  Hz,  $J = 7.4$  Hz,  $J = 1.7$  Hz, 1 H), 7.05 (ddd,  $J = 8.0$  Hz,  $J = 1.9$  Hz,  $J = 0.7$  Hz, 1 H), 6.93-6.85 (m, 4 H), 6.78 (dd,  $J = 8.0$  Hz,  $J = 1.0$  Hz, 1 H), 6.65 (d,  $J = 11.4$  Hz, 1 H), 6.30 (dt,  $J = 16.1$  Hz,  $J = 6.0$  Hz, 1 H), 6.07 (dt,  $J = 11.4$  Hz,  $J = 7.1$  Hz, 1 H), 5.99 (bs, 1 H), 5.61 (bs, 1 H), 4.22 (dd,  $J = 6.0$  Hz,  $J = 1.4$  Hz, 2 H), 4.07 (dd,  $J = 7.1$  Hz,  $J = 1.1$  Hz, 2 H), 3.82-3.71 (m, 4 H), 3.64 (ddd,  $J = 4.3$  Hz,  $J = 4.3$  Hz,  $J = 1.5$  Hz, 2 H), 3.57 (ddd,  $J = 3.4$  Hz,  $J = 2.1$  Hz,  $J = 1.5$  Hz, 2 H), 2.38-2.26 (bm, 2 H). <sup>13</sup>C-NMR {<sup>1</sup>H} (75 MHz, CDCl<sub>3</sub>)  $\delta = 153.4, 153.1, 130.2, 130.0, 129.4, 129.0, 128.7, 127.8, 127.7, 127.1, 124.0, 123.0, 120.9, 120.6, 116.2, 116.2, 72.2, 72.1, 71.5, 67.7, 62.1, 61.9$ , IR 3301, 2932, 2867, 1656, 1603, 1455, 1357, 1251, 1093, 1054, 976, 753 cm<sup>-1</sup>. HRMS C<sub>11</sub>H<sub>14</sub>O<sub>3</sub> (M+Na)<sup>+</sup> calcd. 217.0835, obsvd. 217.0845.

### Procedure for Optimization:

For optimization, four reactions were run simultaneously in separate 5 mL side-arm flasks attached to a four-neck cow.

(*S*)-<sup>i</sup>PrQuinox was prepared according to literature procedure.<sup>6</sup>

A standard solution was prepared by the addition of 412.6 mg of the substrate **2** and 63.3 mg of the internal standard 2-methoxynaphthalene to a 2 mL volumetric flask, followed by the addition of MeOH. The flask was briefly sonicated to dissolve **2** and stirred to give a solution with [**2**] = 1.00 M and [2-methoxynaphthalene] = 0.20 M.

Reaction samples were passed through a short silica plug eluting with 2 mL of EtOAc and analyzed by GC and referenced against a time zero sample containing the standard solution of **2** and 2-methoxynaphthalene. GC yields were calculated based on the ratio of product to internal standard corrected for the response factor. Enantiomeric and diastereomeric ratios were determined using GC with a column equipped with a chiral stationary phase.

**Table 1.** Optimization of reaction conditions.
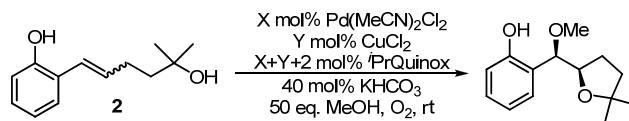

| entry          | X  | Y  | solvent         | time   | %conv <sup>a</sup> | %yield <sup>a</sup> | er <sup>b</sup> | dr <sup>b</sup> |
|----------------|----|----|-----------------|--------|--------------------|---------------------|-----------------|-----------------|
| 1 <sup>c</sup> | 10 | -- | MeOH            | 15 h   | 100                | 2                   | 88:12           | 2.4:1           |
| 2              | 10 | -- | MeOH            | 15 h   | 74                 | 8                   | 92:8            | 2.7:1           |
| 3              | 10 | 20 | MeOH            | 10 min | 100                | 95                  | 92:8            | 9.4:1           |
| 4              | 4  | 8  | MeOH            | 30 min | 100                | 87                  | 92:8            | 9.6:1           |
| 5              | 4  | 8  | THF             | 2 h    | 79                 | 54                  | 98:2            | 7.8:1           |
| 6              | 4  | 8  | toluene         | 2 h    | 96                 | 68                  | 97:3            | 5.1:1           |
| 7              | 4  | 8  | 1:1 THF:toluene | 5 h    | 100                | 67                  | 97:3            | 6.7:1           |
| 8 <sup>d</sup> | 4  | 8  | 1:1 THF:toluene | 2 h    | 99                 | 80                  | 98:2            | 8.9:1           |

Reactions run on 0.1 mmol scale with [2]=0.1 M.  
<sup>a</sup>Determined by GC analysis using an internal standard.  
<sup>b</sup>Determined by GC with a column equipped with a chiral stationary phase. <sup>c</sup>With 50 mg 3 Å MS and without KHCO<sub>3</sub>. <sup>d</sup>CuCl was used in place of CuCl<sub>2</sub>.



**Entry 1:** To a 5 mL side-arm round bottom flask equipped with a stir bar was added 2.6 mg Pd(MeCN)<sub>2</sub>Cl<sub>2</sub> (0.010 mmol, 0.10 equiv.), 2.9 mg (*S*)-*i*PrQuinox (0.012 mmol, 0.12 equiv), 50 mg of freshly activated 3 Å molecular sieves, and 900 μL of MeOH, and the flask was attached to a four-neck cow. A three-way joint fitted with a balloon of O<sub>2</sub> was attached and the apparatus was evacuated (using house vacuum) and refilled with oxygen three times. The mixture was stirred vigorously for 20 minutes at room temperature under O<sub>2</sub>. A 100 μL portion of the standard solution of **2** (0.100 mmol, 1 equiv.) and 2-methoxy naphthalene (0.020 mmol, 0.20 equiv.) was added dropwise to the reaction mixture. Aliquots (ca. 50 μL) of the reaction were taken periodically via syringe.

**Entry 2:** To a 5 mL side-arm round bottom flask equipped with a stir bar was added 2.6 mg Pd(MeCN)<sub>2</sub>Cl<sub>2</sub> (0.010 mmol, 0.10 equiv.), 2.9 mg (*S*)-*i*PrQuinox (0.012 mmol, 0.12 equiv), 4.0 mg of KHCO<sub>3</sub> (0.040 mmol, 0.40 equiv.), and 900 μL of MeOH, and the flask was attached to a four-neck cow. A three-way joint fitted with a balloon of O<sub>2</sub> was attached and the apparatus was evacuated (using house vacuum) and refilled with oxygen three times. The mixture was stirred vigorously for 20 minutes at room temperature under O<sub>2</sub>. A 100 μL portion of the standard solution of **2** (0.100 mmol, 1 equiv.) and 2-methoxy naphthalene (0.020 mmol, 0.20 equiv.) was added dropwise to the reaction mixture. Aliquots (ca. 50 μL) of the reaction were taken periodically via syringe.

**Entry 3:** To a 5 mL side-arm round bottom flask equipped with a stir bar was added 2.6 mg Pd(MeCN)<sub>2</sub>Cl<sub>2</sub> (0.010 mmol, 0.10 equiv.), 2.7 mg of CuCl<sub>2</sub> (0.020 mmol, 0.20 equiv.), 7.7 mg (*S*)-*i*PrQuinox (0.032 mmol, 0.32 equiv), 4.0 mg of KHCO<sub>3</sub> (0.040 mmol, 0.40 equiv.), and 900 μL of MeOH, and the flask was attached to a four-neck cow. A three-way joint fitted with a balloon of O<sub>2</sub> was attached and the apparatus was evacuated (using house vacuum) and refilled with oxygen three times. The mixture was stirred vigorously for 20 minutes at room temperature under O<sub>2</sub>. A 100 μL portion of the standard solution of **2** (0.100 mmol, 1 equiv.) and 2-methoxy naphthalene (0.020 mmol, 0.20 equiv.) was added dropwise to the reaction mixture. Aliquots (ca. 50 μL) of the reaction were taken periodically via syringe.

**Entry 4:** To a 5 mL side-arm round bottom flask equipped with a stir bar was added 1.0 mg Pd(MeCN)<sub>2</sub>Cl<sub>2</sub> (0.0040 mmol, 0.040 equiv.), 1.1 mg of CuCl<sub>2</sub> (0.0080 mmol, 0.080 equiv.), 3.4 mg (*S*)-<sup>*i*</sup>PrQuinox ligand (0.014 mmol, 0.14 equiv.), 4.0 mg of KHCO<sub>3</sub> (0.040 mmol, 0.40 equiv.), and 900 μL of MeOH, and the flask was attached to a four-neck cow. A three-way joint fitted with a balloon of O<sub>2</sub> was attached and the apparatus was evacuated (using house vacuum) and refilled with oxygen three times. The mixture was stirred vigorously for 20 minutes at room temperature under O<sub>2</sub>. A 100 μL portion of the standard solution of **2** (0.100 mmol, 1 equiv.) and 2-methoxy naphthalene (0.020 mmol, 0.20 equiv.) was added dropwise to the reaction mixture. Aliquots (ca. 50 μL) of the reaction were taken periodically via syringe.

**Entry 5:** To a 5 mL side-arm round bottom flask equipped with a stir bar was added 1.0 mg Pd(MeCN)<sub>2</sub>Cl<sub>2</sub> (0.0040 mmol, 0.040 equiv.), 1.1 mg of CuCl<sub>2</sub> (0.0080 mmol, 0.080 equiv.), 3.4 mg (*S*)-<sup>*i*</sup>PrQuinox (0.014 mmol, 0.14 equiv.), 4.0 mg of KHCO<sub>3</sub> (0.040 mmol, 0.40 equiv.), 100 μL of MeOH, and 800 μL of THF, and the flask was attached to a four-neck cow. A three-way joint fitted with a balloon of O<sub>2</sub> was attached and the apparatus was evacuated (using house vacuum) and refilled with oxygen three times. The mixture was stirred vigorously for 20 minutes at room temperature under O<sub>2</sub>. A 100 μL portion of the standard solution of **2** (0.100 mmol, 1 equiv.) and 2-methoxy naphthalene (0.020 mmol, 0.20 equiv.) was added dropwise to the reaction mixture. Aliquots (ca. 50 μL) of the reaction were taken periodically via syringe.

**Entry 6:** To a 5 mL side-arm round bottom flask equipped with a stir bar was added 1.0 mg Pd(MeCN)<sub>2</sub>Cl<sub>2</sub> (0.0040 mmol, 0.040 equiv.), 1.1 mg of CuCl<sub>2</sub> (0.0080 mmol, 0.080 equiv.), 3.4 mg (*S*)-<sup>*i*</sup>PrQuinox (0.014 mmol, 0.14 equiv.), 4.0 mg of KHCO<sub>3</sub> (0.040 mmol, 0.40 equiv.), 100 μL of MeOH, and 800 μL of toluene, and the flask was attached to a four-neck cow. A three-way joint fitted with a balloon of O<sub>2</sub> was attached and the apparatus was evacuated (using house vacuum) and refilled with oxygen three times. The mixture was stirred vigorously for 20 minutes at room temperature under O<sub>2</sub>. A 100 μL portion of the standard solution of **2** (0.100 mmol, 1 equiv.) and 2-methoxy naphthalene (0.020 mmol, 0.20 equiv.) was added dropwise to the reaction mixture. Aliquots (ca. 50 μL) of the reaction were taken periodically via syringe.

**Entry 7:** To a 5 mL side-arm round bottom flask equipped with a stir bar was added 1.0 mg Pd(MeCN)<sub>2</sub>Cl<sub>2</sub> (0.0040 mmol, 0.040 equiv.), 1.1 mg of CuCl<sub>2</sub> (0.0080 mmol, 0.080 equiv.), 3.4 mg (*S*)-<sup>*i*</sup>PrQuinox (0.014 mmol, 0.14 equiv.), 4.0 mg of KHCO<sub>3</sub> (0.040 mmol, 0.40 equiv.), 100 μL of MeOH, 400 μL of toluene, and 400 μL of THF, and the flask was attached to a four-neck cow. A three-way joint fitted with a balloon of O<sub>2</sub> was attached and the apparatus was evacuated (using house vacuum) and refilled with oxygen three times. The mixture was stirred vigorously for 20 minutes at room temperature under O<sub>2</sub>. A 100 μL portion of the standard solution of **2** (0.100 mmol, 1 equiv.) and 2-methoxy naphthalene (0.020 mmol, 0.20 equiv.) was added dropwise to the reaction mixture. Aliquots (ca. 50 μL) of the reaction were taken periodically via syringe.

**Entry 8:** To a 5 mL side-arm round bottom flask equipped with a stir bar was added 1.0 mg Pd(MeCN)<sub>2</sub>Cl<sub>2</sub> (0.0040 mmol, 0.040 equiv.), 0.8 mg of CuCl (0.0080 mmol, 0.080

equiv.), 3.4 mg (*S*)-*i*PrQuinox (0.014 mmol, 0.14 equiv), 4.0 mg of KHCO<sub>3</sub> (0.040 mmol, 0.40 equiv.), 100 μL of MeOH, 400 μL of toluene, and 400 μL of THF, and the flask was attached to a four-neck cow. A three-way joint fitted with a balloon of O<sub>2</sub> was attached and the apparatus was evacuated (using house vacuum) and refilled with oxygen three times. The mixture was stirred vigorously for 20 minutes at room temperature under O<sub>2</sub>. A 100 μL portion of the standard solution of **2** (0.100 mmol, 1 equiv.) and 2-methoxy naphthalene (0.020 mmol, 0.20 equiv.) was added dropwise to the reaction mixture. Aliquots (ca. 50 μL) of the reaction were taken periodically via syringe.

### **Substrate Scope:**

#### **2-((*R*)-(*R*)-5,5-dimethyltetrahydrofuran-2-yl)(methoxy)methyl)phenol (**3a**):**

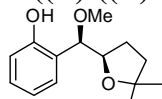

To a 100 mL Schlenk flask equipped with a stir bar was added 5.2 mg Pd(MeCN)<sub>2</sub>Cl<sub>2</sub> (0.020 mmol, 0.040 equiv.), 4.0 mg of CuCl (0.040 mmol, 0.080 equiv.), 16.8 mg of (*S*)-*i*PrQuinox (0.700 mmol, 0.140 equiv.), 20.0 mg of KHCO<sub>3</sub> (0.200 mmol, 0.400 equiv.), 1 mL of MeOH (25 mmol, 50 equiv.), 2 mL of THF, and 2 mL toluene. A three-way joint fitted with a balloon of O<sub>2</sub> was attached and flask was evacuated and refilled with O<sub>2</sub> three times. The mixture was stirred for 20 minutes at room temperature under an atmosphere of O<sub>2</sub>. To the reaction mixture, 103.1 mg of **2** (0.5000 mmol, 1 equiv.) was added. The reaction mixture was stirred for 3 h and diluted with 10 mL of EtOAc. The reaction mixture was then washed with 10 mL 1 M NH<sub>4</sub>Cl, 10 mL brine, dried over Na<sub>2</sub>SO<sub>4</sub>, filtered, and concentrated *in vacuo*. The crude mixture was purified by flash silica-gel column chromatography with 2% to 10% EtOAc/Hexanes as eluent to give 85.7 mg of product (72% yield, average of two reactions). Diastereomeric ratio: 10:1. R<sub>f</sub> = 0.70 w/ 33% EtOAc/Hexane, white solid. Melting point = 81-84 °C. [α]<sub>D</sub><sup>20</sup> = -31.5° (c = 3.53, CHCl<sub>3</sub>). Major diastereomer: <sup>1</sup>H-NMR (400 MHz, CDCl<sub>3</sub>): δ 8.12 (s, 1 H), 7.20 (ddd, *J* = 8.9, *J* = 7.2, *J* = 1.6, 1 H), 7.09 (dd, *J* = 7.6 Hz, *J* = 1.8 Hz, 1 H), 6.91-6.82 (m, 2 H), 4.42-4.32 (m, 2 H), 3.36 (s, 3 H), 1.83 (ddd, *J* = 14.4 Hz, *J* = 7.0 Hz, *J* = 1.4 Hz, 2 H), 1.72-1.49 (m, 2 H), 1.24 (s, 3 H), 1.22 (s, 3 H). <sup>13</sup>C-NMR {<sup>1</sup>H} (100 MHz, CDCl<sub>3</sub>): δ 155.8, 129.5, 129.3, 123.5, 119.9, 117.7, 85.5, 82.8, 81.1, 57.9, 38.3, 28.3, 28.2, 27.9, 27.7, IR 3285, 2869, 2930, 1487, 1456, 1367, 1236, 1102, 1056, 754 cm<sup>-1</sup>. HRMS C<sub>14</sub>H<sub>20</sub>O<sub>3</sub> (M+Na)<sup>+</sup> calcd. 259.1310, obsvd. 259.1308. For x-ray crystal structure data, used to determine relative stereochemistry, see page S31.

#### **2-((*R*)-butoxy((*R*)-5,5-dimethyltetrahydrofuran-2-yl)methyl)phenol (**3b**):**

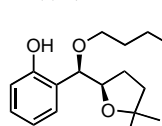

To a 100 mL side-arm round bottom flask equipped with a stir bar was added 5.3 mg Pd(MeCN)<sub>2</sub>Cl<sub>2</sub> (0.020 mmol, 0.040 equiv.), 4.0 mg of CuCl (0.040 mmol, 0.080 equiv.), 16.8 mg of (*S*)-*i*PrQuinox (0.700 mmol, 0.140 equiv.), 20 mg of KHCO<sub>3</sub> (0.20 mmol, 0.40 equiv.) and 2.6 mL of toluene. A three-way joint fitted with a balloon of O<sub>2</sub> was attached and flask was evacuated and refilled three times with O<sub>2</sub>. The mixture was stirred for 20 minutes at room temperature under balloon of O<sub>2</sub>. To the reaction mixture, a 2.3 mL of *n*-butanol (25 mmol, 50 equiv.) and 103.1 mg of **2** (0.5000 mmol, 1.000 equiv.) were added. The reaction mixture was stirred for 12 h and diluted with 10 mL of EtOAc. The reaction mixture was then washed with 1 M NH<sub>4</sub>Cl (10 mL) followed by brine (10 mL). Organic layer was

dried over Na<sub>2</sub>SO<sub>4</sub> and concentrated *in vacuo*. The crude mixture was purified with flash silica-gel column chromatography with Hexane/EtOAc as eluent to give 87.5 mg of product (63% yield, average of two reactions, *Note: 53% yield in THF:toluene (1:1) as solvent*). Diastereomeric ratio: 5:1, Major diastereomer: R<sub>f</sub> = 0.75 w/ 33% EtOAc/Hexane (Silica), colorless liquid, [α]<sub>D</sub><sup>20</sup> = -8.2° (c = 1.0, CHCl<sub>3</sub>), <sup>1</sup>H-NMR (500 MHz CDCl<sub>3</sub>): δ 8.31 (s, 1 H), 7.22 (dd, J = 1.6 Hz, 8.7 Hz, 1 H), 7.09 (dd, J = 1.6 Hz, 7.5 Hz, 1 H), 6.91-6.83 (m, 2 H), 4.43 (d, J = 4.1 Hz, 1 H), 4.3 (ddd, J = 1.0, 4.2 Hz, 1 H), 3.47 (ddd, J = 9.3 Hz, 6.7 Hz, 1.0 Hz, 1 H), 3.37 (ddd, J = 9.3 Hz, 6.5 Hz, 1.0 Hz, 1 H), 2.02-1.82 (m, 2 H), 1.70-1.29 (m, 6 H), 1.24 (s, 3 H), 1.21 (s, 3 H), 0.90 (t, J = 7.14 Hz, 3 H). <sup>13</sup>C-NMR (100 MHz CDCl<sub>3</sub>): δ 155.9, 129.2, 124.4, 119.7, 117.7, 83.3, 82.8, 81.7, 70.0, 38.4, 31.9, 28.1, 28.0, 27.9, 19.5, 14.0, IR: 3289, 2962, 2931, 1455, 1367, 1237, 1095 cm<sup>-1</sup>. HRMS C<sub>17</sub>H<sub>26</sub>O<sub>3</sub> (M+Na)<sup>+</sup> calcd. 301.1780, obsvd. 301.1777.

**2-((R)-(but-3-enyloxy)((R)-5,5-dimethyltetrahydrofuran-2-yl)methyl)phenol (3c):**

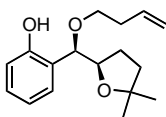

Followed the procedure described for **3b** except 2.9 mL toluene and 2.1 mL of 3-butene-1-ol (25 mmol, 50 equiv.) were used. Yield = 57%, average of two reactions (78.6 mg, *Note: 50% yield in THF:toluene (1:1) as solvent*), Diastereomeric ratio: 4:1, Major diastereomer: R<sub>f</sub> = 0.75 w/ 33% EtOAc/Hexane, colorless liquid, [α]<sub>D</sub><sup>20</sup> = +11.0° (c = 0.1, CHCl<sub>3</sub>), <sup>1</sup>H-NMR (500 MHz CDCl<sub>3</sub>) δ 8.28 (s, 1 H), 7.20 (td, J = 1.8 Hz, 7.7 Hz, 1 H), 7.04 (dd, J = 1.5 Hz, 7.7 Hz, 1 H), 6.90-6.83 (m, 2 H), 5.82 (ddd, J = 6.5 Hz, 3.3 Hz, 7.0 Hz, 1 H), 5.02-4.98 (m, 2 H), 4.44 (d, J = 3.94, 1 H), 4.38 (ddd, J = 6.9 Hz, 4.1 Hz, 1 H), 3.52 (ddd, J = 9.2 Hz, 6.8 Hz, 1 H), 3.42 (ddd, J = 9.3 Hz, 6.6 Hz, 1 H), 2.38 (dd, J = 6.2 Hz, 8.2 Hz, 1 H), 2.09-1.82 (m, 2 H), 1.71-1.4 (m, 2 H), 1.23 (s, 3 H), 1.21 (s, 3 H). <sup>13</sup>C-NMR (125 MHz, CDCl<sub>3</sub>): δ 155.8, 135.2, 129.3, 129.3, 124.3, 119.7, 117.7, 116.8, 83.3, 82.9, 81.7, 69.3, 38.3, 34.4, 28.1, 28.0, 27.9. IR: 3284, 2971, 1733, 1652, 1558, 1487, 1054 cm<sup>-1</sup>. HRMS C<sub>17</sub>H<sub>24</sub>O<sub>3</sub> (M+Na)<sup>+</sup> calcd. 299.1623, obsvd. 299.1615.

**2-((R)-((R)-5,5-dimethyltetrahydrofuran-2-yl)(2-methoxyethoxy)methyl)phenol (3d):**

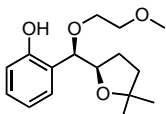

Followed the procedure described for **3a** except 1.5 mL of THF and 1.5 mL toluene (1:1) and 2.0 mL of 2-methoxyethanol (25 mmol, 50 equiv.) were used. Yield = 53%, average of two reactions (74.2 mg, *Note: 40% yield in toluene as solvent*), Diastereomeric ratio: 9:1, Major diastereomer: R<sub>f</sub> = 0.35 w/ 33% EtOAc/Hexane, colorless liquid, [α]<sub>D</sub><sup>20</sup> = -35.0° (c = 0.15, CHCl<sub>3</sub>), <sup>1</sup>H-NMR (400 MHz CDCl<sub>3</sub>): δ 8.20 (s, 1 H), 7.20 (dd, J = 1.8 Hz, 6.9 Hz, 1 H), 7.11 (dd, J = 7.7 Hz, 1 H), 6.91-6.85 (m, 2 H), 4.54 (d, J = 4.4 Hz, 1 H), 4.43 (ddd, J = 7.0 Hz, 4.3 Hz, 4.3 Hz, 1 H), 3.65-3.51 (m, 4 H), 3.33 (s, 3 H), 2.00-1.83 (m, 2 H), 1.74-1.61 (m, 1 H), 1.56-1.49 (m, 1 H), 1.24 (s, 3 H), 1.20 (s, 3 H). <sup>13</sup>C-NMR (100 MHz, CDCl<sub>3</sub>): δ 155.9, 129.5, 129.4, 124.3, 119.9, 118.0, 83.3, 82.9, 81.7, 72.1, 69.1, 59.2, 38.4, 28.1, 28.0, 28.0. IR: 3266, 2968, 2872, 1486, 1097, 753 cm<sup>-1</sup>. HRMS C<sub>16</sub>H<sub>24</sub>O<sub>4</sub> (M+Na)<sup>+</sup> calcd. 303.1572, obsvd. 303.1566.

**2-((R)-(2-chloroethoxy)((R)-5,5-dimethyltetrahydrofuran-2-yl)methyl)phenol (3e):**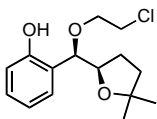

Followed the procedure described for **3b** except 3.3 mL toluene and 1.7 mL of 2-chloroethanol (25 mmol, 50 equiv.) were used. Yield = 61%, average of two reactions (86.6 mg, *Note: 58% yield in THF:toluene (1:1) as solvent*), Diastereomeric ratio: 5:1, Major diastereomer:  $[\alpha]_D^{20} = -38.0^\circ$  ( $c = 0.6$ ,  $\text{CHCl}_3$ )  $R_f = 0.50$  w/ 20% EtOAc/Hexane, Colorless liquid,  $^1\text{H-NMR}$  (400 MHz  $\text{CDCl}_3$ ):  $\delta$  8.29 (s, 1 H), 7.22 (ddd,  $J = 7.5$  Hz, 0.9 Hz Hz, 1 H), 7.13-7.09 (m, 1 H), 6.93-6.85 (m, 2 H), 4.50 (d,  $J = 3.4$  Hz, 1 H), 4.43 (td,  $J = 6.98$  Hz, 3.45 Hz, 1 H), 3.76-3.55 (m, 4 H), 3.33 (s, 3 H), 2.01 (m, 2 H), 1.74-1.58 (m, 2 H), 1.26 (s, 3 H), 1.24 (s, 3 H).  $^{13}\text{C-NMR}$  (100 MHz,  $\text{CDCl}_3$ ):  $\delta$  155.7, 129.8, 129.4, 124.2, 120.0, 118.1, 83.4, 81.9, 69.7, 43.3, 38.3, 28.1, 27.9, 27.8, IR: 3265, 2966, 1490, 1461, 1364, 1190, 1104, 1049,  $754\text{ cm}^{-1}$ . HRMS  $\text{C}_{15}\text{H}_{21}\text{ClO}_3$  ( $\text{M}+\text{Na}$ ) $^+$  calcd. 307.1077, obsvd. 307.1079.

**2-((R)-benzyloxy)((R)-5,5-dimethyltetrahydrofuran-2-yl)methyl)phenol (3f):**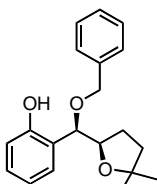

Followed the procedure described for **3a** except 0.7 mL of THF and 0.7 mL toluene (1:1) and 1.6 mL of Benzylalcohol (15 mmol, 50 equiv.) were used. Yield = 51%, average of two reactions (47.7 mg), Diastereomeric ratio: 6:1, Major diastereomer:  $R_f = 0.50$  w/ 20% EtOAc/Hexane, colorless liquid,  $[\alpha]_D^{20} = -49.5^\circ$  ( $c = 0.39$ ,  $\text{CHCl}_3$ ),  $^1\text{H-NMR}$  (300 MHz  $\text{CDCl}_3$ ):  $\delta$  8.33 (s, 1 H), 7.36-7.29 (m, 5 H), 7.22 (td,  $J = 7.7$  Hz, 1.4 Hz Hz, 1 H), 7.11 (dd,  $J = 7.5$  Hz, 1.5 Hz, 1 H), 6.94 (dd,  $J = 8.0$ , 1.0 Hz, 1 H), 6.88 (td,  $J = 7.4$  Hz, 1.1 Hz, 1 H), 4.64 (d,  $J = 12.0$  Hz, 1 H), 4.54 (d,  $J = 3.9$  Hz, 1 H), 4.43 (td,  $J = 7.04$  Hz, 3.95 Hz, 1 H), 4.34 (d,  $J = 12.0$  Hz, 1 H), 1.99-1.88 (m, 2 H), 1.66 (dt,  $J = 12.0$  Hz, 7.32 Hz, 1 H), 1.59-1.51 (m, 1 H), 1.22 (s, 3 H), 1.20 (s, 3 H).  $^{13}\text{C-NMR}$  (75 MHz,  $\text{CDCl}_3$ ):  $\delta$  155.9, 137.9, 129.5, 129.4, 128.5, 128.1, 127.9, 124.0, 119.9, 118.0, 83.0, 81.7, 81.6, 71.2, 38.3, 28.0, 27.9, 27.8. IR: 3285, 2970, 2870, 1717, 1615, 1506, 1455, 1180, 1097, 1027,  $756\text{ cm}^{-1}$ . HRMS  $\text{C}_{20}\text{H}_{24}\text{O}_3$  ( $\text{M}+\text{Na}$ ) $^+$  calcd. 335.1623, obsvd. 335.3925.

**2-((R)-((R)-5,5-dimethyltetrahydrofuran-2-yl)(2(trimethylsilyl)ethoxy)methyl)phenol (3g):**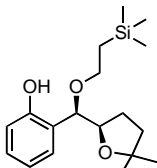

Followed the procedure described for **3b** except 1.9 mL toluene and 1.1 mL of 2-(trimethylsilyl)ethanol (7.5 mmol, 25 equiv.) were used. Yield = 64%, average of two reactions (62.1 mg), Diastereomeric ratio: 5:1, Major diastereomer:  $R_f = 0.85$  w/ 20% EtOAc/Hexane, colorless liquid,  $[\alpha]_D^{20} = -21^\circ$  ( $c = 0.25$ ,  $\text{CHCl}_3$ ),  $^1\text{H-NMR}$  (300 MHz  $\text{CDCl}_3$ ):  $\delta$  8.31 (s, 1 H), 7.18 (td,  $J = 7.7$  Hz, 1.1 Hz Hz, 1 H), 7.10 (dd,  $J = 7.54$  Hz, 1.52 Hz, 1 H), 6.89-6.84 (m, 2 H), 4.50 (d,  $J = 4.5$  Hz, 1 H), 4.37 (td,  $J = 7.08$  Hz, 4.58 Hz, 1 H), 3.63-3.57 (m, 1 H), 3.50-3.45 (m, 1 H), 1.91-1.80 (m, 2 H), 1.63 (dt,  $J = 12.1$  Hz, 7.50 Hz, 1 H), 1.46 (ddd,  $J = 12.08$  Hz, 8.20 Hz, 6.25 Hz, 1 H), 1.21 (s, 3 H), 1.16 (s, 3 H), 1.04 (m, 1 H), 0.92 (m, 1 H), -0.02 (s, 9 H).  $^{13}\text{C-NMR}$  (75 MHz,  $\text{CDCl}_3$ ):  $\delta$  155.9, 129.1, 129.0, 124.3, 119.7, 117.6, 82.6, 82.2, 81.5, 67.6, 38.3, 28.1, 27.8, 27.7, 18.5, 1.2, IR: 3304, 2966, 2894, 1586, 1486, 1384, 1248, 1096, 859, 836,  $755\text{ cm}^{-1}$ . HRMS  $\text{C}_{18}\text{H}_{30}\text{O}_3\text{Si}$  ( $\text{M}+\text{Na}$ ) $^+$  calcd. 345.1862, obsvd. 345.1861.



**2-((R)-(((1R,5S)-6,6-dimethylbicyclo[3.1.1]hept-2-en-2-yl)methoxy)((R)-5,5-dimethyltetrahydrofuran-2-yl)methyl)phenol (3h):**

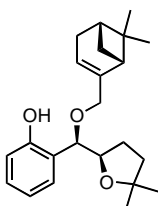

Followed the procedure described for **3b** except 3.0 mL toluene and 2.0 mL of (-)-myrtenol (12.5 mmol, 25.0 equiv.) were used. Yield = 55%, average of two reactions (97.9 mg), Diastereomeric ratio: 9:1, Major diastereomer:  $[\alpha]_D^{20} = -31.3^\circ$  ( $c = 0.7$ ,  $\text{CHCl}_3$ )  $R_f = 0.76$  w/ 33% EtOAc/Hexane, colorless liquid,  $^1\text{H-NMR}$  (400 MHz  $\text{CDCl}_3$ ):  $\delta$  8.28 (s, 1 H), 7.20-7.16 (m, 1 H), 7.08 (dd,  $J = 7.54$  Hz, 1.40 Hz, 1 H), 6.89-6.83 (m, 2 H), 5.46 (dt,  $J = 2.85$  Hz, 1.43 Hz, 1 H) 4.51 (d,  $J = 3.94$  Hz, 1 H), 4.38 (td,  $J = 5.38$  Hz, 3.20 Hz, 1 H), 3.90 (dd,  $J = 12.31$  Hz, 1.65 Hz, 1H), 3.75-3.72 (m, 1 H), 2.33 (dt,  $J = 8.62$  Hz, 5.61 Hz, 1 H), 2.24 (m, 2 H), 2.12 (t,  $J = 5.60$  Hz, 1 H), 2.01 (m, 1 H), 1.94-1.88 (m, 2 H), 1.66-1.61 (m, 1 H) 1.54-1.50 (m, 1 H), 1.27 (s, 3 H), 1.21 (s, 3 H), 1.19 (s, 3 H) 1.07 (d,  $J = 8.6$  Hz, 1 H), 0.86 (s, 3 H).  $^{13}\text{C-NMR}$  (100 MHz,  $\text{CDCl}_3$ ):  $\delta$  155.7, 144.9, 129.1, 129.2, 129.0, 124.1, 120.1, 119.5, 117.5, 82.6, 81.6, 81.5, 81.5, 76.7, 72.4, 43.4, 41.0, 40.8, 38.1, 37.9, 31.5, 31.3, 31.2, 28.0, 27.7, 27.6, 26.2, 21.1, 20.9, IR: 3303, 2969, 2914, 1615, 1486, 1381, 1282, 1126, 1035, 887, 753  $\text{cm}^{-1}$ . HRMS  $\text{C}_{23}\text{H}_{32}\text{O}_3$  ( $\text{M}+\text{Na}$ ) $^+$  calcd. 379.2249, obsvd. 379.2254

**2-((R)-((R)-5,5-dimethyltetrahydrofuran-2-yl)(hydroxy)methyl)phenol (3i):**

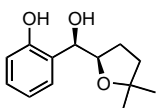

To a 100 mL side-arm round bottom flask equipped with a stir bar was added 8.3 mg  $\text{Pd}((S)\text{-}i\text{PrQuinox})\text{Cl}_2$  (0.020 mmol, 0.040 equiv.), 15.0 mg of  $\text{Cu}((S)\text{-}i\text{PrQuinox})\text{Cl}_2$  (0.040 mmol, 0.080 equiv.), 1.2 mg of  $(S)\text{-}i\text{PrQuinox}$  (0.0050 mmol, 0.010 equiv.), 4.4 mg of  $\text{NaHCO}_3$  (0.050 mmol, 0.10 equiv.) and 4.5 mL  $t\text{AmylOH}$ . A three-way joint fitted with a balloon of  $\text{O}_2$  was attached and flask was evacuated and refilled three times with  $\text{O}_2$ . The mixture was stirred for 20 minutes at room temperature under balloon of  $\text{O}_2$ . To the reaction mixture, a 450  $\mu\text{L}$  of water (25 mmol, 50 equiv.) and 103.1 mg of **2** (0.5000 mmol, 1.000 equiv.) were added. The reaction mixture was stirred for 24 h and diluted with 10 mL of EtOAc. The reaction mixture was then washed with 1 M  $\text{NH}_4\text{Cl}$  (10 mL) followed by brine (10 mL). Organic layer was dried over  $\text{Na}_2\text{SO}_4$  and concentrated *in vacuo*. The crude mixture was purified with flash silica-gel column chromatography with EtOAc/ Hexanes (4% to 10%) as eluent to give 69.9 mg of product (63% yield, average of two reactions). Diastereomeric ratio: 5:1, Major diastereomer:  $R_f = 0.60$  w/ 33% EtOAc/Hexane, colorless solid,  $[\alpha]_D^{20} = -17.0^\circ$  ( $c = 0.1$ ,  $\text{CHCl}_3$ ),  $^1\text{H-NMR}$  (300 MHz,  $\text{CDCl}_3$ ):  $\delta$  8.40 (s, 1 H), 7.20 (ddd,  $J = 8.1$  Hz, 7.4 Hz, 1.7 Hz, 1 H), 7.04 (dd,  $J = 7.6$  Hz, 1.7 Hz, 1 H), 6.89 (dd,  $J = 8.1$  Hz, 1.1 Hz, 1 H), 6.84 (td,  $J = 7.4$  Hz, 1.2 Hz, 1 H), 4.58 (d,  $J = 6.8$  Hz, 1 H), 4.27 (apparent q,  $J = 6.8$  Hz, 1 H), 3.31 (bs, 1 H), 1.95-1.83 (m, 2 H), 1.81-1.75 (m, 2 H), 1.33 (s, 3 H), 1.27 (s, 3 H).  $^{13}\text{C-NMR}$  (75 MHz,  $\text{CDCl}_3$ ):  $\delta$  156.1, 129.7, 128.8, 124.4, 119.9, 118.0, 83.3, 81.1, 78.9, 38.5, 29.1, 28.3, 28.2, IR: 3297, 2968, 1237, 752  $\text{cm}^{-1}$ , HRMS  $\text{C}_{13}\text{H}_{18}\text{O}_3$  ( $\text{M}+\text{Na}$ ) $^+$  calcd. 245.1154, obsvd. 245.1146.

**2-((R)-((R)-5,5-dimethyltetrahydrofuran-2-yl)(2-hydroxyethoxy)methyl)phenol (3j):**

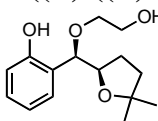

Followed the procedure described for **3i** except 3.6 mL  $t\text{AmylOH}$  and 1.4 mL of ethylene glycol (25 mmol, 50 equiv.) were used. Yield = 59%, average of two reactions (78.5 mg), Diastereomeric ratio: 10:1, Major diastereomer:  $R_f = 0.30$  w/ 66% EtOAc/Hexane, colorless liquid,  $[\alpha]_D^{20} =$

-100° (c = 0.1, CHCl<sub>3</sub>), <sup>1</sup>H-NMR (400 MHz, CDCl<sub>3</sub>): δ 8.27 (s, 1 H), 7.21 (td, *J* = 7.7 Hz, 1.2 Hz, 1 H), 7.07 (dd, *J* = 7.5 Hz, 1.6 Hz, 1 H), 6.91 (dd, *J* = 8.1 Hz, 0.9 Hz, 1 H), 6.87 (td, *J* = 7.4 Hz, 1.1 Hz, 1 H), 4.44-4.38 (m, 2 H), 3.81-3.64 (m, 3 H), 3.58 (ddd, *J* = 10.7 Hz, 5.9 Hz, 3.0 Hz, 1 H), 2.89 (bs, 1 H), 1.93-1.87 (m, 2 H), 1.75-1.65 (m, 2 H), 1.29 (s, 3 H), 1.27 (s, 3 H). <sup>13</sup>C-NMR (100 MHz, CDCl<sub>3</sub>): δ 155.9, 129.8, 129.3, 124.1, 118.1, 85.1, 83.1, 81.7, 71.5, 61.9, 38.5, 28.5, 28.3, 28.0, IR: 3263, 2967, 2869, 1454, 1041, 754 cm<sup>-1</sup>. HRMS C<sub>15</sub>H<sub>22</sub>O<sub>4</sub> (M+Na)<sup>+</sup> calcd. 289.1416, obsvd. 289.1417

**2-((*R*)-azido((*R*)-5,5-dimethyltetrahydrofuran-2-yl)methyl)phenol (3k):**

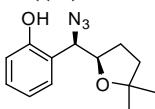

To a 100 mL side-arm round bottom flask equipped with a stir bar was added 8.3 mg Pd((*S*)-*i*PrQuinox)Cl<sub>2</sub> (0.020 mmol, 0.040 equiv.), 15.0 mg of Cu((*S*)-*i*PrQuinox)Cl<sub>2</sub> (0.040 mmol, 0.080 equiv.), 1.2 mg of (*S*)-*i*PrQuinox (0.0050 mmol, 0.010 equiv.), 4.4 mg of NaHCO<sub>3</sub> (0.050 mmol, 0.10 equiv.) and 5.0 mL *t*AmylOH. A three-way joint fitted with a balloon of O<sub>2</sub> was attached and flask was emptied and refilled three times with O<sub>2</sub>. The mixture was stirred for 20 minutes at room temperature under balloon of O<sub>2</sub>. To the reaction mixture, 65 mg of NaN<sub>3</sub> (1.0 mmol, 2.0 equiv.) and 103.1 mg of **2** (0.2000 mmol, 1.000 equiv.) were added. The reaction mixture was stirred for 48 h at 30 °C and diluted with 10 mL of EtOAc. The reaction mixture was then washed with 1.0 M NH<sub>4</sub>Cl (10 mL) followed by brine (10 mL). Organic layer was dried over Na<sub>2</sub>SO<sub>4</sub> and concentrated *in vacuo*. The product was purified with flash silica-gel column chromatography with 2% to 10% EtOAc/Hexanes as eluent to give 62.9 mg of product (50% yield, average of two reactions). [α]<sub>D</sub><sup>20</sup> = +22.1° (c = 0.25, CHCl<sub>3</sub>), <sup>1</sup>H-NMR for Major Diastereomer (400 MHz CDCl<sub>3</sub>): δ 8.21 (s, 1 H), 7.28-7.23 (m, 1H), 7.18-7.15 (dd, *J* = 1.5 Hz, 7.5 Hz, 1 H), 7.01-6.88 (m, 2 H), 4.70-4.65 (d, *J* = 3.2 Hz, 1 H), 4.35-4.25 (td, *J* = 3.2 Hz, 6.7 Hz, 1 H), 1.9-1.8 (m, 2 H), 1.78-1.62 (m, 2 H), 1.23 (s, 6 H). <sup>13</sup>C-NMR (125 MHz, CDCl<sub>3</sub>): δ 155.3, 130.3, 129.9, 123.3, 120.4, 118.8, 84.3, 81.5, 66.9, 38.1, 28.4, 28.0, 27.8. HRMS C<sub>13</sub>H<sub>17</sub>N<sub>3</sub>O<sub>2</sub> (M+Na)<sup>+</sup> calcd. 270.1216, obsvd. 270.1214.

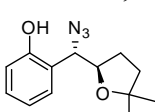

<sup>1</sup>H-NMR for Minor Diastereomer (400 MHz CDCl<sub>3</sub>): δ 8.34 (s, 1 H), 7.28-7.23 (m, 1H), 7.18-7.15 (dd, *J* = 1.5 Hz, 7.5 Hz, 1 H), 7.01-6.88 (m, 2 H), 4.78-4.75 (d, *J* = 3.2 Hz, 1 H), 4.44-4.38 (td, *J* = 3.2 Hz, 6.7 Hz, 1 H), 2.1-1.9 (m, 2 H), 1.78-1.62 (m, 2 H), 1.31 (s, 3 H), 1.27 (s, 3 H). <sup>13</sup>C-NMR (125 MHz, CDCl<sub>3</sub>): δ 155.4, 130.6, 130.5, 120.2, 118.8, 83.9, 81.6, 68.5, 38.1, 28.8, 28.0, 27.8, IR: 3264, 2971, 2100, 1456, 1251, 754 cm<sup>-1</sup>.

**2-((*R*)-methoxy((*R*)-tetrahydrofuran-2-yl)methyl)phenol (3l):**

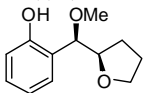

Followed the procedure described for **3a**; 89.0 mg of **S3** (0.500 mmol, 1.00 equiv.) was added. Reaction was stirred for 7 h. Yield = 68%, average of two reactions, Diastereomeric ratio: 10:1, Major diastereomer: R<sub>f</sub> = 0.40 w/ 33% EtOAc/Hexane, white solid. MP = 64-65 °C. [α]<sub>D</sub><sup>20</sup> = -62.0° (c = 0.1, CHCl<sub>3</sub>), <sup>1</sup>H-NMR (400 MHz, CDCl<sub>3</sub>): δ 8.09 (s, 1 H), 7.22 (dd, *J* = 1.6 Hz, 8.3 Hz, 1 H), 7.09 (dd, *J* = 7.5 Hz, 1.9 Hz, 1 H), 6.94-6.84 (m, 2 H), 4.39-4.20 (m, 2 H), 3.98-3.78 (m, 2 H), 3.39 (s, 3 H), 1.89-1.65 (m, 4 H). <sup>13</sup>C-NMR {<sup>1</sup>H} (100 MHz, CDCl<sub>3</sub>): δ 155.9, 129.7, 129.4, 123.0, 119.9, 117.6, 86.2, 81.5, 69.2, 57.9, 28.2, 26.0, IR 3282, 2933, 2874, 1486, 1456, 1149, 1057, 753 cm<sup>-1</sup>. HRMS C<sub>12</sub>H<sub>16</sub>O<sub>3</sub> (M+Na)<sup>+</sup> calcd. 231.0997, obsvd. 231.0990.

### 2-((*R*)-methoxy(*R*)-tetrahydro-2*H*-pyran-2-yl)methyl)phenol (**3m**):

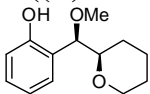

To a 100 mL side-arm round bottom flask equipped with a stir bar was added 5.2 mg Pd(MeCN)<sub>2</sub>Cl<sub>2</sub> (0.020 mmol, 0.040 equiv.), 4.0 mg of CuCl (0.040 mmol, 0.080 equiv.), 16.8 mg of (*S*)-<sup>*i*</sup>PrQuinox (0.070 mmol, 0.140 equiv.), 20.0 mg of KHCO<sub>3</sub> (0.200 mmol, 0.400 equiv.), 1 mL of MeOH (25 mmol, 50 equiv.), 1 mL of THF, and 2 mL toluene. A three-way joint fitted with a balloon of O<sub>2</sub> was attached, and flask was evacuated and refilled with O<sub>2</sub> three times. The mixture was stirred for 20 minutes at room temperature under an atmosphere of O<sub>2</sub>. To the reaction mixture, 96.1 mg of **S8** (0.5000 mmol, 1 equiv.) in a solution in 1 mL THF was added. The reaction mixture was stirred for 24 h and diluted with 10 mL of EtOAc. The reaction mixture was then washed with 1 M NH<sub>4</sub>Cl (10 mL) followed by brine (10 mL). Organic layer was dried over Na<sub>2</sub>SO<sub>4</sub> and concentrated *in vacuo*. The crude mixture was purified with flash silica-gel column chromatography with 2% to 10% EtOAc/Hexanes as eluent to give 55.0 mg of product (50% yield, average of two reactions). Diastereomeric ratio: 6:1, Major diastereomer: R<sub>f</sub> = 0.66 w/ 1:1 EtOAc:Hexanes, white solid. MP = 98-103 °C. [α]<sub>D</sub><sup>20</sup> = -14.0° (c = 0.28, CHCl<sub>3</sub>), <sup>1</sup>H-NMR (300 MHz, CDCl<sub>3</sub>) δ 7.97 (s, 1 H), 7.22 (ddd, *J* = 7.7 Hz, *J* = 7.7 Hz, *J* = 1.7 Hz, 1 H), 7.03 (dd, *J* = 7.5 Hz, *J* = 1.7 Hz, 1 H), 6.91-6.83 (m, 2 H), 4.23 (d, *J* = 5.6 Hz, 1 H), 4.16-4.05 (m, 1 H), 3.75-3.68 (m, 1 H), 3.49 (ddd, *J* = 11.5 Hz, *J* = 11.5 Hz, *J* = 2.7, 1 H), 3.38 (s, 3H), 1.85-1.75 (m, 1H), 1.65-1.15 (m, 5 H). <sup>13</sup>C-NMR {<sup>1</sup>H} (75 MHz, CDCl<sub>3</sub>) δ 155.8, 129.9, 129.7, 122.9, 119.9, 117.6, 87.3, 80.0, 69.1, 57.9, 28.1, 25.9, 23.1. IR 3326, 2937, 2855, 1506, 1457, 1241, 1082, 756 cm<sup>-1</sup>. HRMS C<sub>13</sub>H<sub>18</sub>O<sub>3</sub> (M+Na)<sup>+</sup> calcd. 245.1148, obsvd. 245.1152.

### 2-((*R*)-((*R*)-1,4-dioxan-2-yl)(methoxy)methyl)phenol (**3n**):

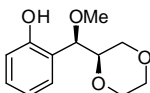

To a 200 mL side-arm round bottom flask equipped with a stir bar was added 5.2 mg Pd(MeCN)<sub>2</sub>Cl<sub>2</sub> (0.020 mmol, 0.040 equiv.), 4.0 mg of CuCl (0.040 mmol, 0.080 equiv.), 16.8 mg of (*S*)-<sup>*i*</sup>PrQuinox (0.070 mmol, 0.140 equiv.), 42.0 mg of NaHCO<sub>3</sub> (0.500 mmol, 1.00 equiv.), 1 mL of MeOH (25 mmol, 50 equiv.), 1 mL of THF, and 2 mL toluene. A three-way joint fitted with a balloon of O<sub>2</sub> was attached, and flask was evacuated and refilled with O<sub>2</sub> three times. The mixture was stirred for 20 minutes at room temperature under an atmosphere of O<sub>2</sub>. To the reaction mixture, 97.1 mg of **S11** (0.5000 mmol, 1 equiv.) in a solution in 1 mL THF was added. The reaction mixture was stirred for 24 h and diluted with 10 mL of CH<sub>2</sub>Cl<sub>2</sub>. The reaction mixture was then washed with 1 M NH<sub>4</sub>Cl (10 mL) followed by brine (10 mL). Organic layer was dried over Na<sub>2</sub>SO<sub>4</sub> and concentrated *in vacuo*. The crude mixture was passed through a plug of alumina with 200 mL of 1:1 EtOAc:hexanes followed by 10% MeOH/EtOAc (to separate the product from ligand, which are inseparable by silica chromatography). The portion eluted with 10% MeOH/EtOAc was concentrated *in vacuo*, then purified with flash silica-gel column chromatography with 1% MeOH/CH<sub>2</sub>Cl<sub>2</sub> as eluent to give 39.5 mg of the product (30% yield, average of two reactions). Diastereomeric ratio: 6:1, Major diastereomer: R<sub>f</sub> = 0.60 w/ 10% MeOH/CH<sub>2</sub>Cl<sub>2</sub>, clear oil. [α]<sub>D</sub><sup>20</sup> = -26.3° (c = 1.88, CHCl<sub>3</sub>), <sup>1</sup>H-NMR (300 MHz, CDCl<sub>3</sub>) δ 7.64 (s, 1 H), 7.23 (dd, *J* = 8.5 Hz, *J* = 1.5 Hz, 1 H), 6.98 (dd, *J* = 7.6 Hz, *J* = 1.8 Hz, 1 H), 6.93-6.83 (m, 2 H), 4.27 (d, *J* = 6.0 Hz, 1 H), 3.97 (ddd, *J* = 9.3 Hz, *J* = 6.1 Hz, *J* = 3.4 Hz, 1 H), 3.90 (bdd, *J* = 9.9 Hz, *J* = 2.1 Hz, 1 H), 3.77 (ddd, *J* = 11.2 Hz, *J* = 11.2 Hz, *J* = 2.8 Hz, 1 H), 3.69 (bdd, *J* = 9.9 Hz, *J* = 2.8 Hz, 1 H), 3.59 (ddd, *J* = 11.2 Hz, *J* = 11.2

Hz,  $J = 2.8$  Hz, 1 H), 3.51-3.41 (m, 2 H), 3.39 (s, 3 H).  $^{13}\text{C-NMR}$   $\{^1\text{H}\}$  (75 MHz,  $\text{CDCl}_3$ )  $\delta$  155.8, 130.2, 129.2, 121.5, 120.2, 117.6, 84.3, 68.3, 67.1, 66.4, 57.9, 29.9, IR 3363, 3054, 2859, 1489, 1457, 1265, 1242, 1123, 1083, 731, 702  $\text{cm}^{-1}$ . HRMS  $\text{C}_{12}\text{H}_{16}\text{O}_4$  ( $\text{M}+\text{Na}$ ) $^+$  calcd. 247.0941, obsvd. 247.0945.

### Inverse Electron Demand Diels Alder Reaction:

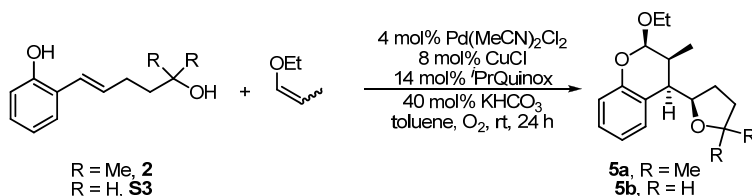

### **(2R,3S,4R)-4-((R)-5,5-dimethyltetrahydrofuran-2-yl)-2-ethoxy-3-methylchroman (5a):**

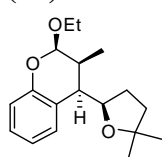

To a 250 mL side-arm round bottom flask equipped with a stir bar was added 5.2 mg  $\text{Pd}(\text{MeCN})_2\text{Cl}_2$  (0.020 mmol, 0.040 equiv.), 4.0 mg of  $\text{CuCl}$  (0.040 mmol, 0.080 equiv.), 16.8 mg of (*S*)-*i*PrQuinox (0.070 mmol, 0.140 equiv.), 20.0 mg of  $\text{KHCO}_3$  (0.200 mmol, 0.40 equiv.), and 2.2 mL toluene. A three-way joint fitted with a balloon of  $\text{O}_2$  was attached, and flask was evacuated and refilled with  $\text{O}_2$  three times. The mixture was stirred for 20 minutes at room temperature under an atmosphere of  $\text{O}_2$ . To the reaction mixture, 103.1 mg of **2** (0.5000 mmol, 1 equiv.) as a solution in 2.8 mL of ethyl propenyl ether (25 mmol, 50 equiv.,  $Z:E = 10:1$ ) was added (*Note*: ethyl propenyl ether was purchased as a 3:1 mixture of isomers and enriched through multiple fractional distillations). The reaction flask was evacuated and refilled with  $\text{O}_2$  twice more. The reaction mixture was stirred for 24 h and passed through a plug of silica with 50 mL  $\text{EtOAc}$  and concentrated *in vacuo*, then purified with flash alumina column chromatography with hexanes followed by 1%  $\text{EtOAc}$ /hexanes to 2%  $\text{EtOAc}$ /hexanes as eluent to give 104.1 mg of the product (72% yield). Diastereomeric ratio: 33:5:1, major diastereomer:  $R_f = 0.60$  w/ 1:4  $\text{EtOAc}$ :hexanes, clear oil.  $[\alpha]_D^{20} = -30.8^\circ$  ( $c = 1.73$ ,  $\text{CHCl}_3$ ),  $^1\text{H-NMR}$  (300 MHz,  $\text{CDCl}_3$ )  $\delta$  7.31-7.28 (m, 1 H), 7.13 (ddd,  $J = 7.7$  Hz,  $J = 7.7$  Hz,  $J = 1.7$  Hz, 1 H), 6.87-6.81 (m, 2 H), 5.04 (d,  $J = 2.6$  Hz, 1 H), 4.34 (ddd,  $J = 6.8$  Hz,  $J = 6.8$  Hz,  $J = 4.6$  Hz, 1 H), 3.98 (dq,  $J = 9.5$  Hz,  $J = 7.1$  Hz, 1 H), 3.60 (dq,  $J = 9.5$  Hz,  $J = 7.1$  Hz, 1 H), 3.09 (dd,  $J = 5.0$  Hz,  $J = 5.0$  Hz, 1 H), 2.42 (qdd,  $J = 7.1$  Hz,  $J = 5.5$  Hz,  $J = 2.5$  Hz, 1 H), 2.18-2.07 (m, 1 H), 1.71-1.50 (m, 3 H), 1.31 (s, 3 H), 1.23 (t,  $J = 7.1$  Hz, 3 H), 1.20 (s, 3 H), 1.07 (d,  $J = 7.1$  Hz, 3 H).  $^{13}\text{C-NMR}$   $\{^1\text{H}\}$  (75 MHz,  $\text{CDCl}_3$ )  $\delta$  153.2, 129.4, 127.8, 123.1, 120.3, 116.6, 101.6, 79.7, 77.8, 64.6, 43.4, 39.0, 33.8, 30.7, 29.0, 27.3, 15.3, 10.6, IR 2969, 2879, 1581, 1487, 1454, 1376, 1365, 1222, 1149, 1093, 1040, 978, 932, 752  $\text{cm}^{-1}$ . HRMS  $\text{C}_{18}\text{H}_{26}\text{O}_3$  ( $\text{M}+\text{Na}$ ) $^+$  calcd. 313.1780, obsvd. 313.1775. Relative stereochemistry assigned by a combination of coupling constants, as compared to reported Diels Alder adducts with ethyl propenyl ether and a related quinone methide,<sup>7</sup> and x-ray crystal structure analysis of the lactone derivative (see page S42).

**(2*R*,3*S*,4*R*)-2-ethoxy-3-methyl-4-((*R*)-tetrahydrofuran-2-yl)chroman (5b):**

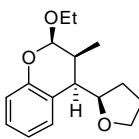

To a 250 mL side-arm round bottom flask equipped with a stir bar was added 5.2 mg Pd(MeCN)<sub>2</sub>Cl<sub>2</sub> (0.020 mmol, 0.040 equiv.), 4.0 mg of CuCl (0.040 mmol, 0.080 equiv.), 16.8 mg of (*S*)-*i*PrQuinox (0.070 mmol, 0.140 equiv.), 20.0 mg of KHCO<sub>3</sub> (0.200 mmol, 0.40 equiv.), and 2.2 mL toluene.

A three-way joint fitted with a balloon of O<sub>2</sub> was attached, and flask was evacuated and refilled with O<sub>2</sub> three times. The mixture was stirred for 20 minutes at room temperature under an atmosphere of O<sub>2</sub>. To the reaction mixture, 89.1 mg of **S3** (0.5000 mmol, 1 equiv.) as a solution in 2.8 mL of ethyl propenyl ether (25 mmol, 50 equiv., *Z:E* = 10:1) was added (*Note*: ethyl propenyl ether was purchased as a 3:1 mixture of isomers and enriched through multiple fractional distillations). The reaction flask was evacuated and refilled with O<sub>2</sub> twice more. The reaction mixture was stirred for 24 h and passed through a plug of silica with 50 mL EtOAc and concentrated *in vacuo*, then purified with flash alumina column chromatography with 1% EtOAc/hexanes to 2% EtOAc/hexanes as eluent to give 88.2 mg of the product (67% yield). Diastereomeric ratio: 33:8:1, major diastereomer: R<sub>f</sub> = 0.70 w/ 1:3 EtOAc:hexanes, clear oil. [α]<sub>D</sub><sup>20</sup> = -36.1° (c = 0.58, CHCl<sub>3</sub>), <sup>1</sup>H-NMR (300 MHz, CDCl<sub>3</sub>) δ 7.26-7.22 (m, 1 H), 7.13 (ddd, *J* = 7.7 Hz, *J* = 7.7 Hz, *J* = 1.7 Hz, 1 H), 6.88-6.81 (m, 2 H), 5.07 (d, *J* = 2.5 Hz, 1 H), 4.22 (ddd, *J* = 7.1 Hz, *J* = 7.1 Hz, *J* = 5.5 Hz, 1 H), 3.98 (dq, *J* = 9.6 Hz, *J* = 7.1 Hz, 1 H), 3.90 (ddd, *J* = 7.3 Hz, *J* = 5.3 Hz, *J* = 5.3 Hz, 1 H), 3.65 (dd, *J* = 7.3 Hz, *J* = 7.1 Hz, 1 H), 3.61 (dq, *J* = 9.6 Hz, *J* = 7.1 Hz, 1 H), 3.15 (dd, *J* = 5.3 Hz, *J* = 5.3 Hz, 1 H), 2.43 (qdd, *J* = 7.0 Hz, *J* = 5.5 Hz, *J* = 2.5 Hz, 1 H), 2.13-2.03 (m, 1 H), 1.94-1.71 (m, 2 H), 1.65-1.53 (m, 1 H), 1.24 (t, *J* = 7.1 Hz, 3 H), 1.06 (d, *J* = 7.0 Hz, 3 H). <sup>13</sup>C-NMR {<sup>1</sup>H} (75 MHz, CDCl<sub>3</sub>) δ 153.3, 129.1, 127.9, 122.7, 120.5, 116.7, 101.7, 79.1, 67.4, 64.7, 43.4, 33.7, 30.4, 26.7, 15.3, 10.1, IR 2977, 2875, 1581, 1487, 1454, 1375, 1352, 1237, 1222, 1159, 1064, 1041, 981, 931, 754 cm<sup>-1</sup>. HRMS C<sub>16</sub>H<sub>22</sub>O<sub>3</sub> (M+Na)<sup>+</sup> calcd. 285.1467, obsvd. 285.1472.

## Determination of enantiomeric ratio:

Table 3. Separation conditions to determine enantiomeric ratio.

| entry | Compound | Conditions                                                                                                                                                                            | Retention time                                             | er                    |
|-------|----------|---------------------------------------------------------------------------------------------------------------------------------------------------------------------------------------|------------------------------------------------------------|-----------------------|
| 1     |          | GC, $\beta$ -cyclodextrin column<br>120 °C for 20 min,<br>increase to 140 °C at 0.4 °C/min<br>hold at 140 °C for 2 min,<br>increase to 200 °C at 5 °C/min<br>hold at 200 °C for 8 min | 56.8 and 57.9 min                                          | 97.9:2.1              |
| 2     |          | SFC, 1% Methanol, 3 mL/min<br>Whelko chiral column                                                                                                                                    | 3.9 and 4.5 min                                            | 96.4:3.6 <sup>a</sup> |
| 3     |          | SFC, 1% Methanol, 1 mL/min<br>Whelko chiral column                                                                                                                                    | 11.6 and 12.7 min                                          | 96.0:4.0 <sup>a</sup> |
| 4     |          | SFC, 1% Methanol, 3 mL/min<br>5 $\mu$ m Cellucoat chiral column                                                                                                                       | 4.9 and 5.7 min                                            | 97.7:2.3              |
| 5     |          | SFC, 1% Methanol, 3 mL/min<br>Whelko chiral column                                                                                                                                    | 3.7 and 4.3 min                                            | 94.0:6.0 <sup>a</sup> |
| 6     |          | SFC, 1% Methanol, 3 mL/min<br>Whelko chiral column                                                                                                                                    | 7.4 and 8.1 min                                            | 96.9:3.1 <sup>a</sup> |
| 7     |          | HPLC, 0.5% IPA/Hex, 1 mL/min<br>OJ-H chiral column                                                                                                                                    | 29.8 and 32.6 min                                          | 99.4:0.6 <sup>b</sup> |
| 8     |          | HPLC, 0.5% IPA/Hex, 1 mL/min<br>OJ-H chiral column                                                                                                                                    | 29.8 and 32.6 min                                          | 98.4:1.6              |
| 9     |          | SFC, 1% MeCN, 3 mL/min<br>Cellucoat chiral column                                                                                                                                     | 2.5 and 3.9 min                                            | 94.9:5.1              |
| 10    |          | HPLC, 1% IPA:Hex, 1 mL/min<br>OD chiral column                                                                                                                                        | 10.0 and 13.7 min for major<br>18.5 and 32.9 min for minor | 91.9:8.1<br>91.9:8.1  |
| 11    |          | SFC, 1% Methanol, 1 mL/min<br>AD-H chiral column                                                                                                                                      | 12.2 and 13.7 min                                          | 94.8:5.2              |
| 12    |          | SFC, 1% Ethanol, 1.5 mL/min<br>Whelko chiral column                                                                                                                                   | 12.5 and 14.1 min                                          | 94.3:5.7              |
| 13    |          | SFC, 1% Methanol, 1.5 mL/min<br>Whelko chiral column                                                                                                                                  | 12.3 and 14.1 min                                          | 92.0:8.0              |
| 14    |          | GC, $\beta$ -cyclodextrin column<br>122 °C for 270 min                                                                                                                                | 246.2 and 252.3 min                                        | 93.3:6.7              |
| 15    |          | GC, $\beta$ -cyclodextrin column<br>122 °C for 330 min                                                                                                                                | 276.5 and 286.6 min                                        | 95.9:4.1              |

Separations were performed on the major diastereomer of the product. (a) Product was converted to the corresponding methoxy phenol derivative using KOH and MeI. (b) Product was converted to the free alcohol (**3**) via deprotection using  $\text{BF}_3 \cdot \text{OEt}_2$ .

**Table 3, Entry 1 (3a):**

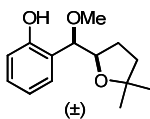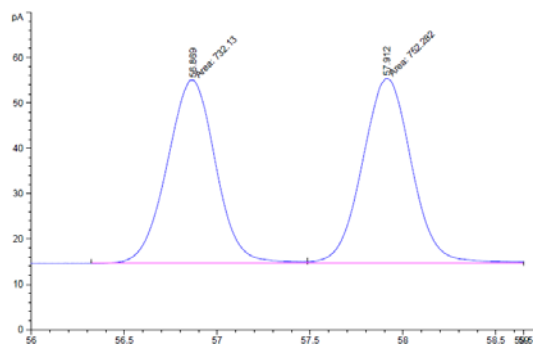

| Peak # | RetTime [min] | Type | Width [min] | Area [pA*s] | Height [pA] | Area %  |
|--------|---------------|------|-------------|-------------|-------------|---------|
| 1      | 56.869        | MF   | 0.3021      | 732.12994   | 40.39624    | 49.3212 |
| 2      | 57.912        | FM   | 0.3076      | 752.28223   | 40.75905    | 50.6788 |

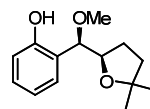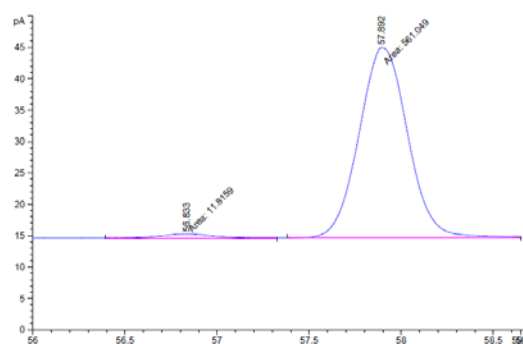

| Peak # | RetTime [min] | Type | Width [min] | Area [pA*s] | Height [pA] | Area %  |
|--------|---------------|------|-------------|-------------|-------------|---------|
| 1      | 56.833        | MM   | 0.3101      | 11.81586    | 6.35050e-1  | 2.0626  |
| 2      | 57.892        | MM   | 0.3082      | 561.04932   | 30.33831    | 97.9374 |

**Table 3, Entry 2 (3b):**

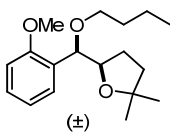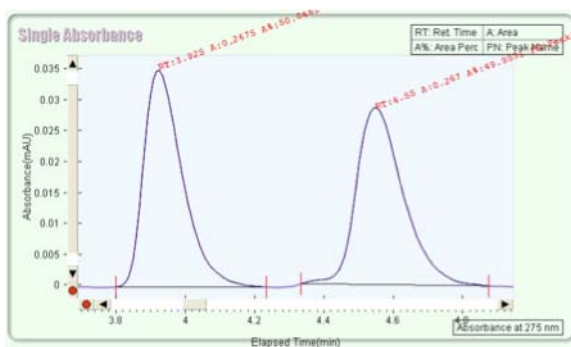

| % Peak Area | Retention Time |
|-------------|----------------|
| 50.0469     | 3.925 min      |
| 49.9531     | 4.55 min       |

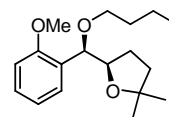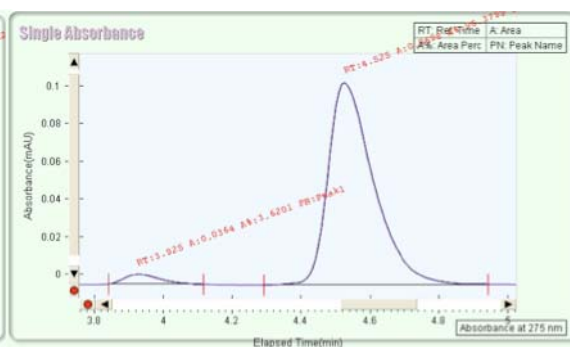

| % Peak Area | Retention Time |
|-------------|----------------|
| 3.6201      | 3.925 min      |
| 96.3799     | 4.525 min      |

**Table 3, Entry 3 (3c):**

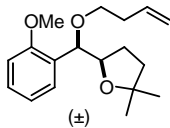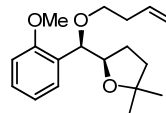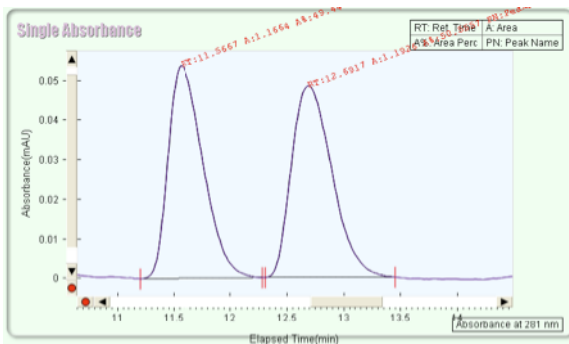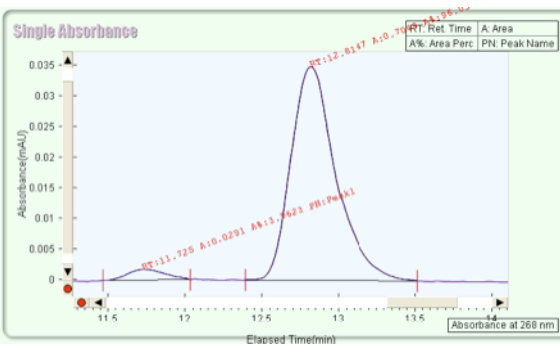

| % Peak Area | Retention Time | % Peak Area | Retention Time |
|-------------|----------------|-------------|----------------|
| 49.4443     | 11.5667 min    | 3.9623      | 11.725 min     |
| 50.5557     | 12.6917 min    | 96.0377     | 12.8167 min    |

**Table 3, Entry 4 (3d):**

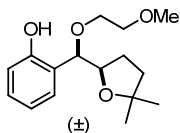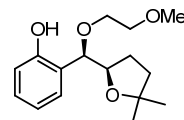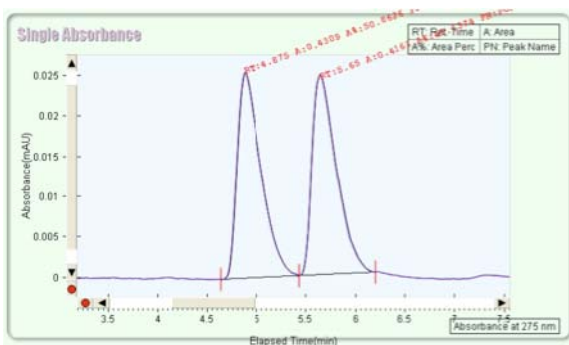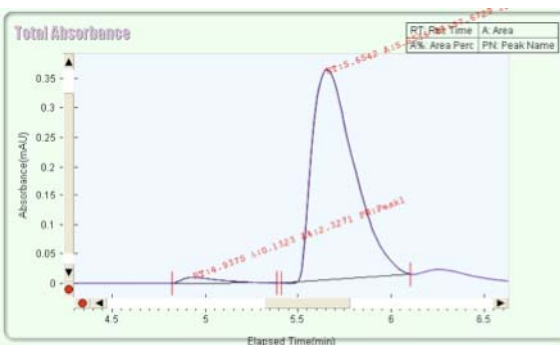

| % Peak Area | Retention Time | % Peak Area | Retention Time |
|-------------|----------------|-------------|----------------|
| 50.8626     | 4.875 min      | 2.3271      | 4.9375 min     |
| 49.1374     | 5.65 min       | 97.6729     | 5.6542 min     |



**Table 3, Entry 5 (3e):**

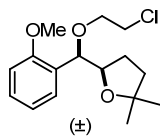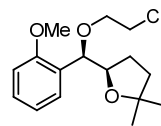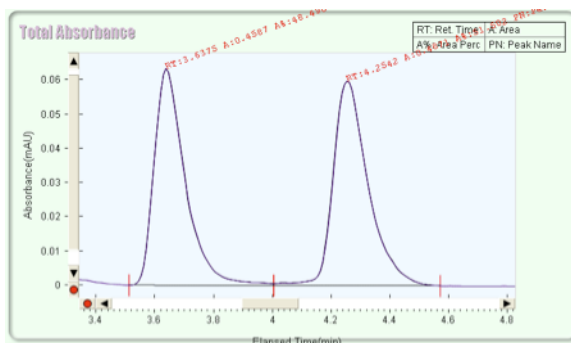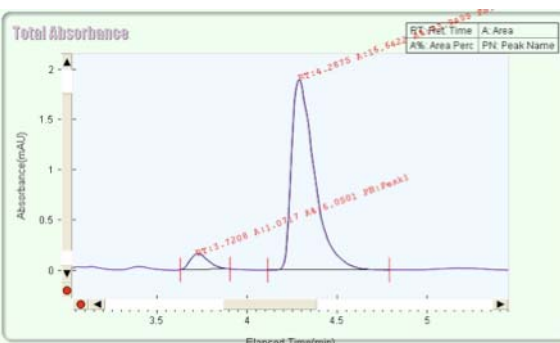

| % Peak Area | Retention Time | % Peak Area | Retention Time |
|-------------|----------------|-------------|----------------|
| 48.498      | 3.6375 min     | 6.0501      | 3.7208 min     |
| 51.502      | 4.2542 min     | 93.9499     | 4.2875 min     |

**Table 3, Entry 6 (3f):**

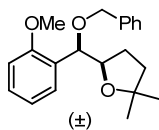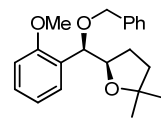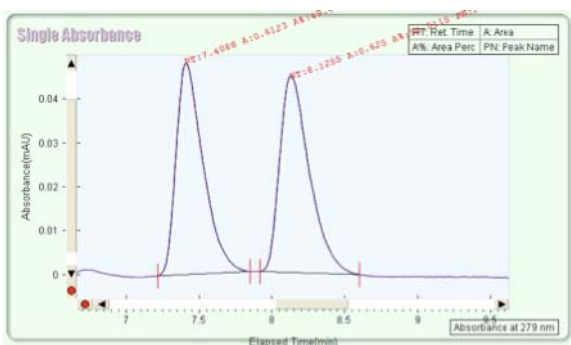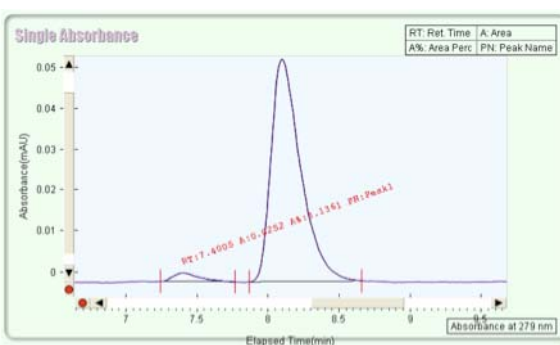

| % Peak Area | Retention Time | % Peak Area | Retention Time |
|-------------|----------------|-------------|----------------|
| 49.4885     | 7.4088 min     | 3.1361      | 7.4005 min     |
| 50.5115     | 8.1255 min     | 96.8639     | 8.1005 min     |

**Table 3, Entry 7 (3g):**

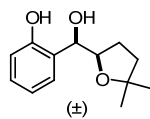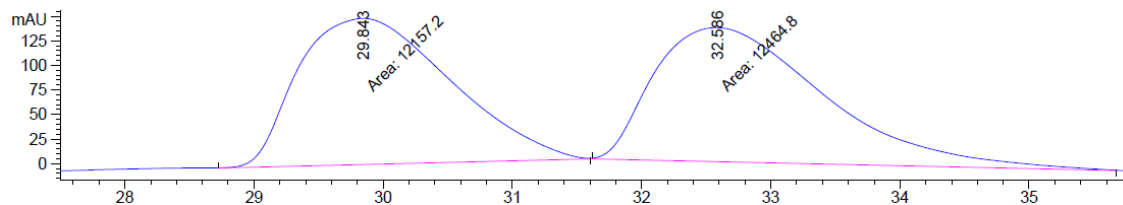

| Peak # | RetTime [min] | Type | Width [min] | Area [mAU*s] | Height [mAU] | Area %  |
|--------|---------------|------|-------------|--------------|--------------|---------|
| 1      | 29.843        | MM   | 1.3616      | 1.21572e4    | 148.81494    | 49.3754 |
| 2      | 32.586        | MM   | 1.5214      | 1.24648e4    | 136.54688    | 50.6246 |

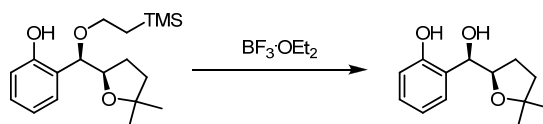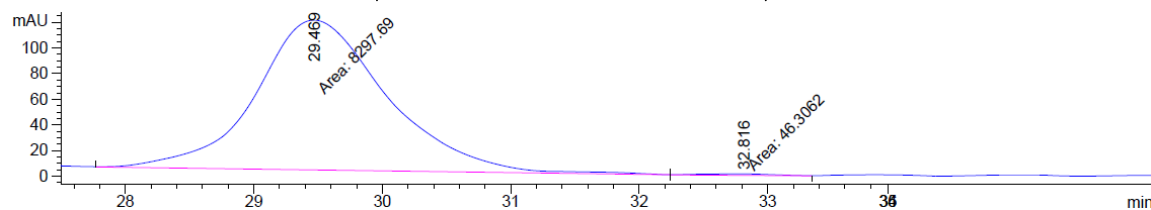

| Peak # | RetTime [min] | Type | Width [min] | Area [mAU*s] | Height [mAU] | Area %  |
|--------|---------------|------|-------------|--------------|--------------|---------|
| 1      | 29.469        | MM   | 1.1841      | 8297.69043   | 116.79210    | 99.4450 |
| 2      | 32.816        | MM   | 0.6802      | 46.30616     | 1.13460      | 0.5550  |

**Table 3, Entry 8 (3i):**

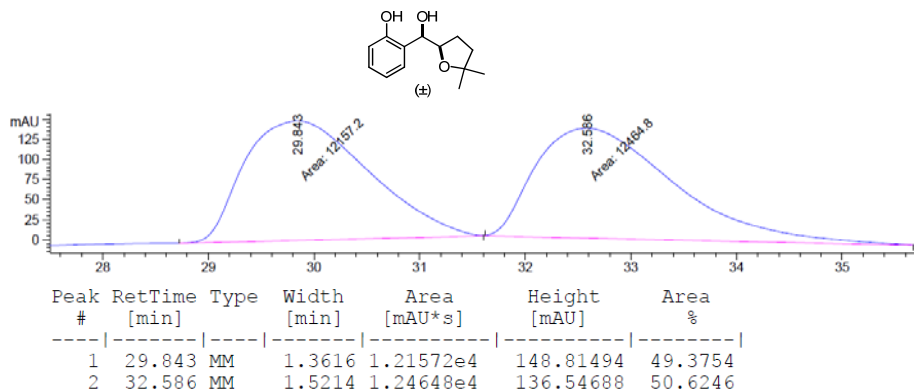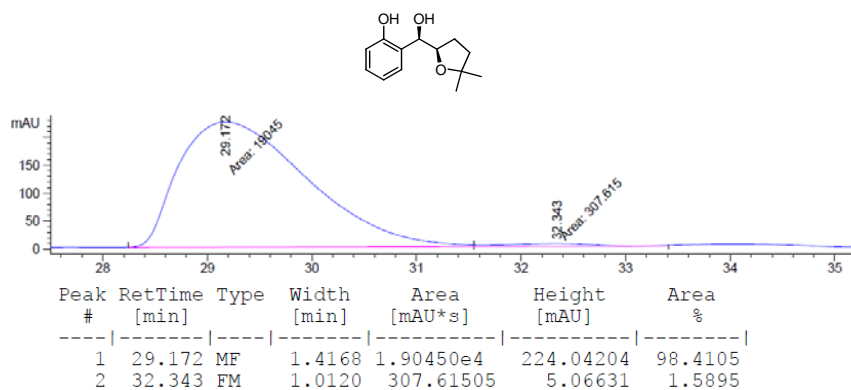

**Table 3, Entry 9 (3j):**

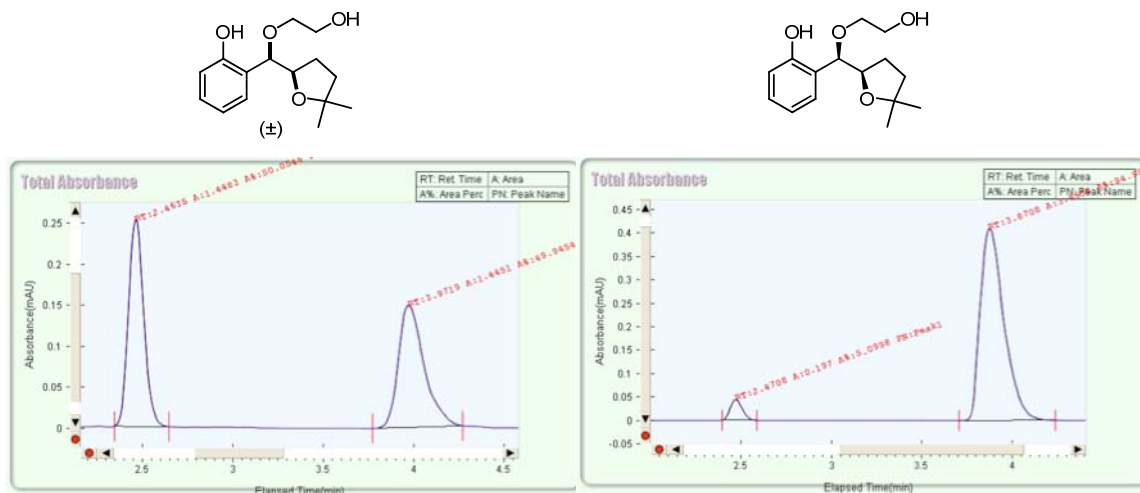

| % Peak Area | Retention Time | % Peak Area | Retention Time |
|-------------|----------------|-------------|----------------|
| 50.0546     | 2.4635 min     | 5.0998      | 2.4708 min     |
| 49.9454     | 3.9719 min     | 94.9002     | 3.8708 min     |

**Table 3, Entry 10 (3k):**

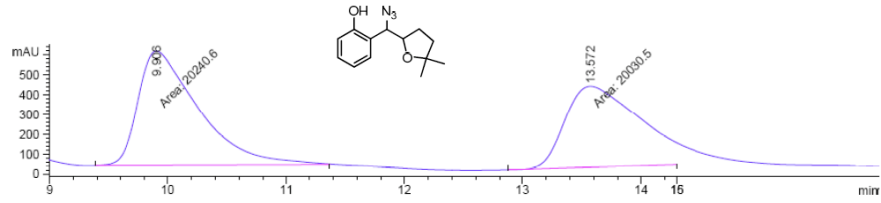

Signal 2: DAD1 B, Sig=220,8 Ref=off

| Peak # | RetTime [min] | Type | Width [min] | Area [mAU*s] | Height [mAU] | Area %  |
|--------|---------------|------|-------------|--------------|--------------|---------|
| 1      | 9.906         | MM   | 0.5878      | 2.02406e4    | 573.88910    | 50.2609 |
| 2      | 13.572        | MM   | 0.8089      | 2.00305e4    | 412.73068    | 49.7391 |

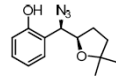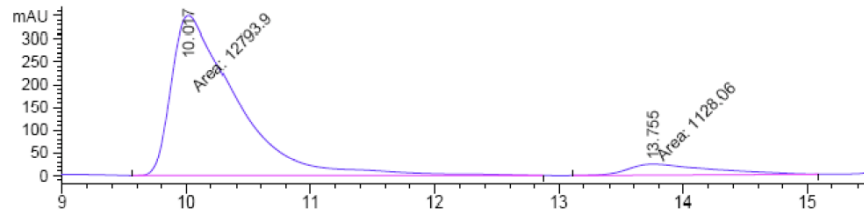

Signal 2: DAD1 B, Sig=220,8 Ref=off

| Peak # | RetTime [min] | Type | Width [min] | Area [mAU*s] | Height [mAU] | Area %  |
|--------|---------------|------|-------------|--------------|--------------|---------|
| 1      | 10.017        | MM   | 0.6099      | 1.27939e4    | 349.59860    | 91.8973 |
| 2      | 13.755        | MM   | 0.7735      | 1128.05811   | 24.30574     | 8.1027  |

**Table 3, Entry 11 (3l):**

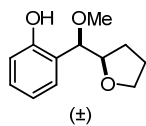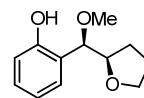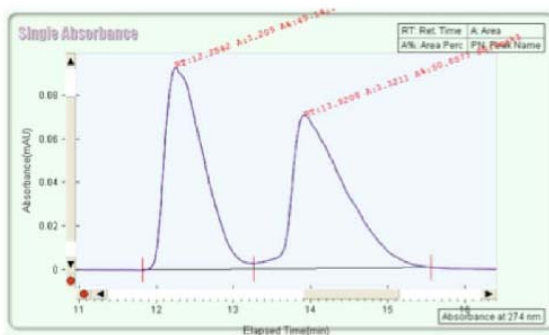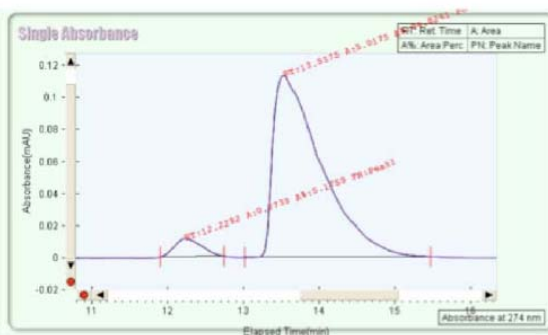

| % Peak Area | Retention Time | % Peak Area | Retention Time |
|-------------|----------------|-------------|----------------|
| 49.1423     | 12.2542 min    | 5.1759      | 12.2292 min    |
| 50.8577     | 13.9208 min    | 94.8241     | 13.5375 min    |

**Table 3, Entry 12 (3m):**

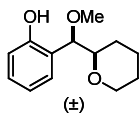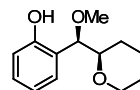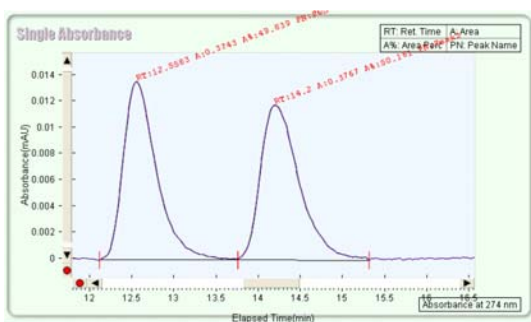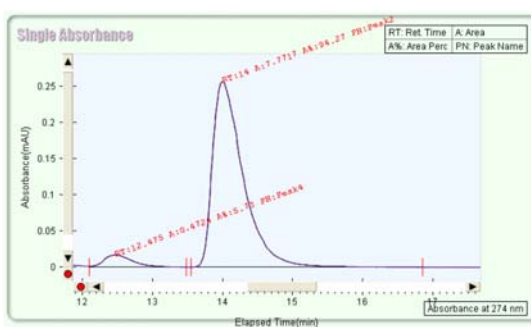

| % Peak Area | Retention Time | % Peak Area | Retention Time |
|-------------|----------------|-------------|----------------|
| 49.839      | 12.5583 min    | 5.73        | 12.475 min     |
| 50.161      | 14.2 min       | 94.27       | 14 min         |

**Table 3, Entry 13 (3n):**

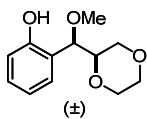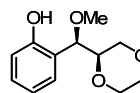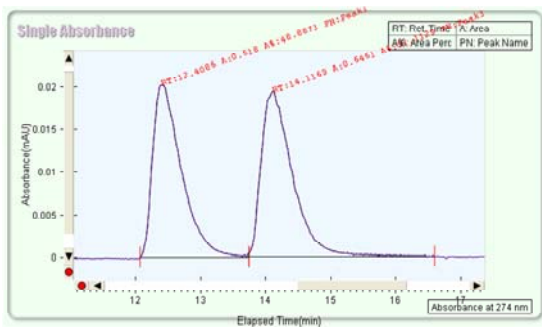

| % Peak Area | Retention Time |
|-------------|----------------|
| 48.8871     | 12.4086 min    |
| 51.1129     | 14.1169 min    |

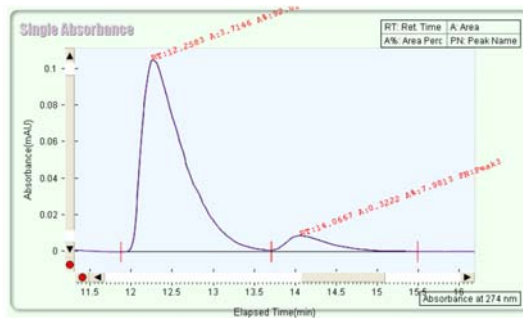

| % Peak Area | Retention Time |
|-------------|----------------|
| 92.0187     | 12.2583 min    |
| 7.9813      | 14.0667 min    |

**Table 3, Entry 14 (5a):**

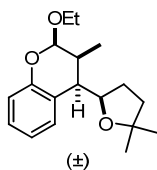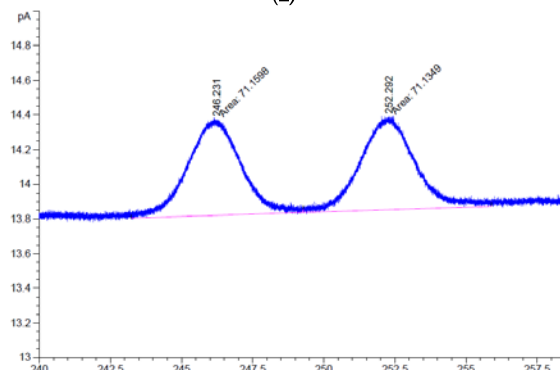

| Peak # | RetTime [min] | Type | Width [min] | Area [pA*s] | Height [pA] | Area %  |
|--------|---------------|------|-------------|-------------|-------------|---------|
| 1      | 246.231       | MF   | 2.1337      | 71.15984    | 5.55828e-1  | 50.0088 |
| 2      | 252.292       | FM   | 2.1977      | 71.13490    | 5.39465e-1  | 49.9912 |

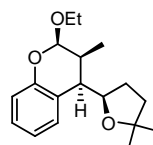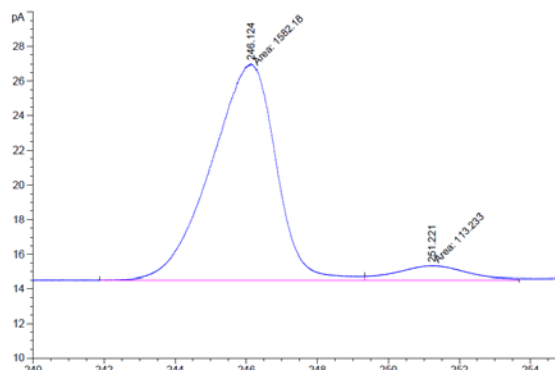

| Peak # | RetTime [min] | Type | Width [min] | Area [pA*s] | Height [pA] | Area %  |
|--------|---------------|------|-------------|-------------|-------------|---------|
| 1      | 246.124       | MF   | 2.1049      | 1582.18030  | 12.52771    | 93.3212 |
| 2      | 251.221       | FM   | 2.1976      | 113.23334   | 8.58775e-1  | 6.6788  |

**Table 3, Entry 15 (5b):**

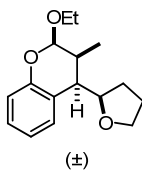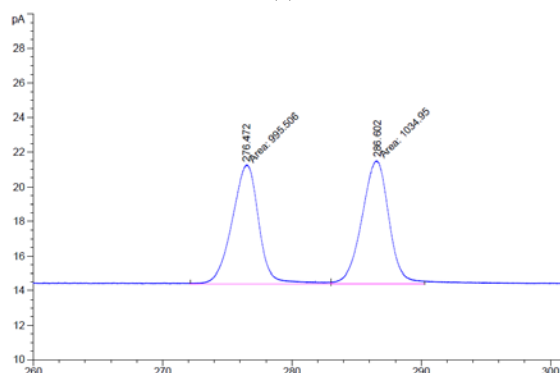

| Peak # | RetTime [min] | Type | Width [min] | Area [pA*s] | Height [pA] | Area %  |
|--------|---------------|------|-------------|-------------|-------------|---------|
| 1      | 276.472       | MF   | 2.3999      | 995.50623   | 6.91358     | 49.0286 |
| 2      | 286.602       | FM   | 2.4124      | 1034.95374  | 7.15010     | 50.9714 |

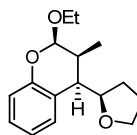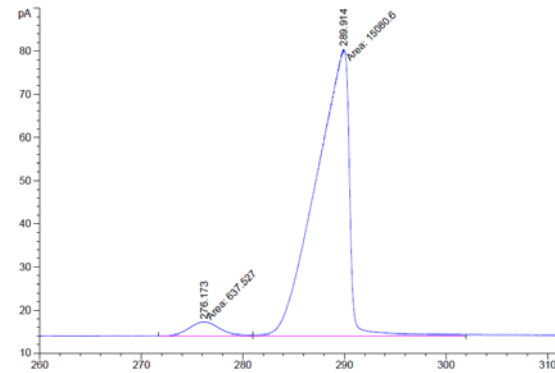

| Peak # | RetTime [min] | Type | Width [min] | Area [pA*s] | Height [pA] | Area %  |
|--------|---------------|------|-------------|-------------|-------------|---------|
| 1      | 276.173       | MF   | 3.3129      | 637.52747   | 3.20726     | 4.0560  |
| 2      | 289.914       | FM   | 3.7839      | 15080.6e4   | 66.42497    | 95.9440 |

## Dearomatization of Phenol:<sup>8</sup>

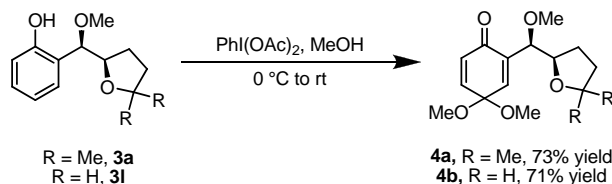

To an oven-dried 50 mL round bottom flask equipped with a stir bar was added 240.0 mg of **3a** (1.010 mmol, 1.000 equiv.) in 7.5 mL MeOH. To the reaction mixture cooled to 0 °C in an ice bath, 720.0 mg of PhI(OAc)<sub>2</sub> (2.230 mmol, 2.200 equiv.) in 5 mL of MeOH was added dropwise and warmed to room temperature. After stirring for 90 min, the reaction mixture was then cooled to 0 °C and solution of sat. Na<sub>2</sub>CO<sub>3</sub> was added until precipitate was observed. To this 20 mL of EtOAc and 5 mL of water was added. The organic layer was separated and washed with water (5 mL) followed by brine (10 mL). The organic layer was dried over Na<sub>2</sub>SO<sub>4</sub> and concentrated *in vacuo*. The product was purified with flash silica-gel column chromatography with 10% to 30% EtOAc/Hexanes as eluent to give 215.5 mg of product (73% yield, average of two reactions).

### 2-((*R*)-((*R*)-5,5-dimethyltetrahydrofuran-2-yl)(methoxy)methyl)-4,4-dimethoxycyclohexa-2,5-dienone (**4a**):

$R_f = 0.4$  w/ 33% EtOAc/Hexane, colorless liquid,  $[\alpha]_D^{20} = -42.3^\circ$  ( $c = 6.3$ , CHCl<sub>3</sub>), <sup>1</sup>H-NMR (500 MHz, CDCl<sub>3</sub>):  $\delta$  6.83 (dd,  $J = 3.29$  Hz, 0.9 Hz, 1 H), 6.76 (dd,  $J = 10.2$  Hz, 3.3 Hz, 1 H), 6.23 (d,  $J = 10.2$  Hz, 1 H), 4.24 (dd,  $J = 6.2$ , 0.8 Hz, 1 H), 3.90 (q,  $J = 6.5$  Hz, 1 H), 3.35 (s, 3 H), 3.33 (s, 3 H), 3.22 (s, 3 H), 1.70 (m, 4 H), 1.20 (s, 3 H), 1.16 (s, 3 H). <sup>13</sup>C-NMR (125 MHz, CDCl<sub>3</sub>):  $\delta$  185.0, 143.1, 140.6, 137.8, 130.0, 93.0, 81.6, 81.0, 79.1, 57.4, 50.5, 50.4, 38.3, 28.8, 28.2, 28.0, IR: 2967, 2936, 1678, 1644, 1458, 1364, 1109, 1038, 962, 843 cm<sup>-1</sup>. HRMS C<sub>16</sub>H<sub>24</sub>O<sub>5</sub> (M+Na)<sup>+</sup> calcd. 319.1521, obsvd. 319.1526.

### 4,4-dimethoxy-2-((*R*)-methoxy((*R*)-tetrahydrofuran-2-yl)methyl)cyclohexa-2,5-dienone (**4b**):

Same procedure as **4a**. 192.4 mg of product (71% yield, average of two reactions).  $R_f = 0.45$  w/ 33% EtOAc/Hexane, colorless liquid,  $[\alpha]_D^{20} = -57.3^\circ$  ( $c = 1.4$ , CHCl<sub>3</sub>), <sup>1</sup>H-NMR (500 MHz, CDCl<sub>3</sub>):  $\delta$  6.92 (dd,  $J = 3.2$  Hz, 0.8 Hz, 1 H), 6.82 (dd,  $J = 10.3$  Hz, 3.3 Hz, 1 H), 6.27 (d,  $J = 10.2$  Hz, 1 H), 4.30 (dd,  $J = 5.1$  Hz, 0.9 Hz, 1 H), 3.87 (m, 2 H), 3.35 (ddd,  $J = 4.2$  Hz, 1 H), 3.40 (s, 3 H), 3.37 (s, 3 H), 3.30 (s, 3 H), 1.80 (m, 4 H). <sup>13</sup>C-NMR (125 MHz, CDCl<sub>3</sub>):  $\delta$  185.2, 143.4, 140.5, 137.6, 130.1, 93.2, 80.9, 78.3, 68.7, 57.8, 50.7, 50.5, 27.6, 26.0, IR: 2940, 2830, 1678, 1644, 1461, 1375, 1116, 962, 843 cm<sup>-1</sup>. HRMS C<sub>14</sub>H<sub>20</sub>O<sub>5</sub> (M+Na)<sup>+</sup> calcd. 291.1208, obsvd. 291.1202.



## Determination of absolute configuration by Mosher ester analysis:<sup>9</sup>

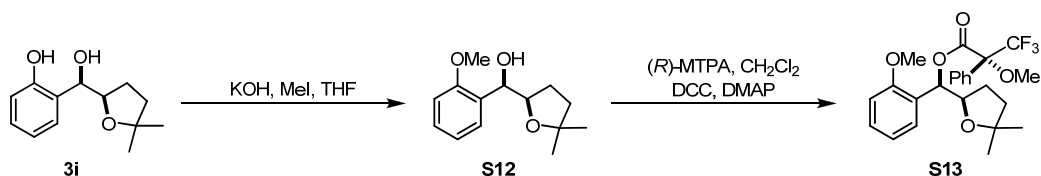

To an oven dried 5 mL round bottom flask equipped with a stir bar was added 38.0 mg of **3i** (0.170 mmol, 1.00 equiv.) in 1.7 mL THF. To the reaction mixture, 10.0 mg of KOH (0.170 mmol, 1.00 equiv.) and 21  $\mu$ L of MeI (0.34 mmol, 2.0 equiv.) were added at room temperature. After 2 h the solution was diluted with EtOAc and washed with water (2 x 5 mL). The organic layer was dried over Na<sub>2</sub>SO<sub>4</sub> and concentrated *in vacuo*. The product was used without further purification.

To an oven dried 5 mL round bottom flask equipped with a stir bar was added 20.2 mg of compound **S12** (0.085 mmol, 2.0 equiv.) in 400  $\mu$ L CH<sub>2</sub>Cl<sub>2</sub>. To the reaction mixture, a 19.2 mg of DCC (0.0920 mmol, 2.20 equiv.) 1.5 mg of DMAP (0.3 equiv.) and 10 mg of (R)-MTPA (0.043 mmol, 1.0 equiv.) was added at room temperature. After 2 days, the solution was diluted with EtOAc and washed with solution of sat. NH<sub>4</sub>Cl (2 mL) followed by water (2 x 5 mL). The organic layer was dried over Na<sub>2</sub>SO<sub>4</sub> and concentrated *in vacuo*. The product was purified with flash silica-gel column chromatography with EtOAc/Hexanes as eluent to give the product in 40% yield.

### **(R)-((R)-((R)-5,5-dimethyltetrahydrofuran-2-yl)(2-methoxyphenyl)methyl) 3,3,3-trifluoro-2-methoxy-2-phenylpropanoate (S13):**

(R)-enantiomer of Mosher ester: <sup>1</sup>H-NMR (500 MHz, CDCl<sub>3</sub>):  $\delta$  7.56 (d, 2 H), 7.40-7.31 (m, 4 H), 7.05 (dd,  $J = 7.6$  Hz,  $J = 1.6$  Hz, 1 H), 6.90-6.84 (m, 2 H), 6.32 (d,  $J = 8.5$  Hz, 1 H), 4.32-4.28 (m, 1 H), 3.87 (s, 3 H), 3.63 (s, 3 H), 1.83-1.67 (m, 4 H), 1.30 (s, 3 H), 1.23 (s, 3 H).

### **(S)-((R)-((R)-5,5-dimethyltetrahydrofuran-2-yl)(2-methoxyphenyl)methyl) 3,3,3-trifluoro-2-methoxy-2-phenylpropanoate (S14)**

(S)- Enantiomer of Mosher ester: <sup>1</sup>H-NMR (500 MHz, CDCl<sub>3</sub>):  $\delta$  7.56 (m, 2 H), 7.40-7.27 (m, 4 H), 6.93 (td,  $J = 7.5$  Hz,  $J = 1.0$  Hz, 1 H), 6.89 (dd,  $J = 8.3$  Hz, 0.9 Hz, 1 H), 6.44 (d,  $J = 7.3$  Hz, 1 H), 4.26 (ddd,  $J = 7.2$  Hz, 6.0 Hz, 1 H), 3.86 (s, 3 H), 3.51 (s, 3 H), 1.82-1.57 (m, 4 H), 1.26 (s, 3 H), 1.14 (s, 3 H).

The Mosher ester analysis revealed that absolute configuration of major diastereomer at benzylic position is *R*.

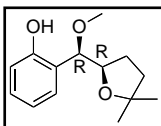

## Derivatization of Diels-Alder product via Jones oxidation:<sup>10</sup>

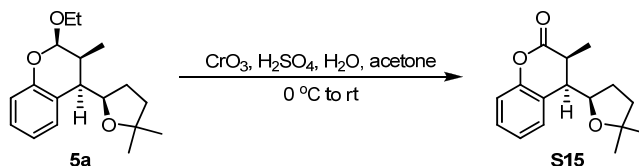

### Synthesis of (3*S*,4*R*)-4-((*R*)-5,5-dimethyltetrahydrofuran-2-yl)-3-methylchroman-2-one (**S15**):

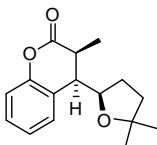

The Jones Reagent was prepared by addition of 2.5 mL of conc.  $\text{H}_2\text{SO}_4$  to 2.5 g of  $\text{CrO}_3$ . The solution was cooled to  $0\text{ }^\circ\text{C}$  and 7.5 mL of cold  $\text{H}_2\text{O}$  was added slowly with rapid stirring. 132 mg of **5a** in a 100 mL round bottom flask was dissolved in 5 mL of acetone under an atmosphere of nitrogen. The reaction flask was cooled to  $0\text{ }^\circ\text{C}$  and 800  $\mu\text{L}$  of Jones Reagent (2.0 mmol, 4.0 equiv.) was added dropwise. The reaction mixture was slowly warmed to rt and stirred for 3 h. The reaction was quenched by the dropwise addition of isopropanol until the reaction mixture turned from orange to green. Approximately 10 mL of brine was added, and the mixture was extracted with EtOAc (3 x 10 mL). The combined organic phase was washed with brine, dried over  $\text{Na}_2\text{SO}_4$ , filtered, and concentrated *in vacuo*, then purified by flash silica-gel column chromatography with 4% EtOAc/hexanes to 10% EtOAc/hexanes as eluent to give 69 mg of product (53% yield).  $R_f = 0.40$  w/ 1:4 EtOAc:hexanes, colorless solid, MP =  $79\text{--}86\text{ }^\circ\text{C}$ .  $[\alpha]_D^{20} = +43.5^\circ$  ( $c = 0.45$ ,  $\text{CHCl}_3$ ),  $^1\text{H-NMR}$  (300 MHz,  $\text{CDCl}_3$ )  $\delta$  7.30-7.24 (m, 2 H), 7.08 (ddd,  $J = 7.5\text{ Hz}$ ,  $J = 7.5\text{ Hz}$ ,  $J = 1.3\text{ Hz}$ , 1 H), 7.04 (dd,  $J = 8.4\text{ Hz}$ ,  $J = 1.5\text{ Hz}$ , 1 H), 4.22 (ddd,  $J = 9.4\text{ Hz}$ ,  $J = 5.5\text{ Hz}$ ,  $J = 4.9\text{ Hz}$ , 1 H), 3.27 (dd,  $J = 6.4\text{ Hz}$ ,  $J = 5.0\text{ Hz}$ , 1 H), 3.04 (dq,  $J = 6.9\text{ Hz}$ ,  $J = 6.9\text{ Hz}$ , 1 H), 1.80-1.71 (m, 1 H), 1.68-1.59 (m, 1 H), 1.49 (dd,  $J = 7.8\text{ Hz}$ ,  $J = 3.0\text{ Hz}$ , 1 H), 1.41 (d,  $J = 7.0\text{ Hz}$ , 3 H), 1.44-1.34 (m, 1 H), 1.22 (s, 3 H), 0.89 (m, 1 H).  $^{13}\text{C-NMR}$  { $^1\text{H}$ } (75 MHz,  $\text{CDCl}_3$ )  $\delta$  171.9, 152.0, 130.9, 128.8, 124.1, 123.9, 116.6, 80.6, 77.4, 44.4, 38.7, 37.1, 28.7, 28.6, 27.8, 12.8. IR 2968, 2871, 1767, 1487, 1457, 1379, 1215, 1142, 1083, 1056,  $757\text{ cm}^{-1}$ . HRMS  $\text{C}_{16}\text{H}_{20}\text{O}_3$  ( $\text{M}+\text{Na}$ )<sup>+</sup> calcd. 283.1310, obsvd. 283.1315. X-ray quality single crystals were obtained by recrystallization from cold pentane (see page S42).

**Synthesis of Pd((S)-*i*-PrQuinox)Cl<sub>2</sub>:** To an oven dried 100 mL round bottom flask equipped with stir bar was added 380.9 mg of Pd(MeCN)<sub>2</sub>Cl<sub>2</sub> (1.470 mmol, 1.000 equiv.), 300 mg of (S)-*i*-PrQuinox ligand (1.47 mmol, 1.00 equiv.) and 80 mL of DCE under a nitrogen atmosphere. The reaction mixture was heated at reflux for 10 h. The reaction mixture was then allowed to cool to room temperature and concentrated to ca. 2 mL. To this mixture, 3 mL of CH<sub>2</sub>Cl<sub>2</sub> was added, and precipitation was observed. The remaining solvent was removed *in vacuo* and dried overnight under vacuum to give the desired complex in quantitative yield (680 mg).  $[\alpha]_{\text{D}}^{20} = -57^{\circ}$  (c = 0.19, CHCl<sub>3</sub>), <sup>1</sup>H-NMR (400 MHz, CDCl<sub>3</sub>) δ 9.59 (d, *J* = 8.7 Hz, 1 H), 8.39 (d, *J* = 8.0 Hz, 1 H), 7.83 (d, *J* = 8.4 Hz, 1 H), 7.71 (d, *J* = 8.4 Hz, 1 H), 7.56 (m, 2 H), 5.07 (t, *J* = 10.6 Hz, 1 H), 4.76-4.71 (m, 2 H), 2.89-2.74 (m, 1 H), 0.95 (d, *J* = 6.9 Hz, 3 H), 0.81 (d, *J* = 6.6 Hz, 3 H). <sup>13</sup>C-NMR (100 MHz, CDCl<sub>3</sub>): δ 169.9, 148.7, 145.9, 141.6, 132.3, 131.3, 129.8, 129.5, 127.9, 120.7, 72.1, 67.7, 29.3, 18.8, 14.5. IR: 2958, 1651, 1589, 1371, 923, 839 cm<sup>-1</sup>.

**Synthesis of Cu((S)-*i*-PrQuinox)Cl<sub>2</sub>:** To an oven dried 50 mL round bottom flask equipped with stir bar was added 45.3 mg of CuCl<sub>2</sub> (0.340 mmol, 1.00 equiv.), 81 mg of (S)-*i*-PrQuinox ligand (0.34 mmol, 1.00 equiv.) and 16 mL of MeOH under a nitrogen atmosphere. The reaction mixture was heated at reflux for 10 h. The reaction mixture was then allowed to cool to room temperature and concentrated to ca. 2 mL. 3 mL of CH<sub>2</sub>Cl<sub>2</sub> was added, and precipitation was observed. The remaining solvent was removed *in vacuo* and dried overnight under vacuum to give complex in quantitative yield (126.3 mg).  $[\alpha]_{\text{D}}^{20} = +229^{\circ}$  (c = 0.17, CHCl<sub>3</sub>), IR: 1651, 1590, 1510, 1254, 1165, 758 cm<sup>-1</sup>, HRMS C<sub>16</sub>H<sub>24</sub>O<sub>5</sub> (M+Na)<sup>+</sup> calcd. 338.0247, obsvd. 338.0249.

## X-Ray crystal structure data for dialkoxylation product 3a:

### Crystal Structure Report

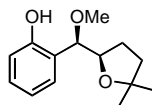

### Experimental:

A colorless prism shaped crystal 0.35 x 0.33 x 0.20 mm in size was mounted on a glass fiber with traces of viscous oil and then transferred to a Nonius KappaCCD diffractometer equipped with Mo K $\alpha$  radiation ( $\lambda = 0.71073 \text{ \AA}$ ). Ten frames of data were collected at 105(1)K with an oscillation range of 1 deg/frame and an exposure time of 20 sec/frame. [REF1] Indexing and unit cell refinement based on all observed reflection from those ten frames, indicated a hexagonal *P* lattice. A total of 3395 reflections ( $\Theta_{\max} = 27.45^\circ$ ) were indexed, integrated and corrected for Lorentz, polarization and absorption effects using DENZO-SMN and SCALEPAC. [REF 2] Post refinement of the unit cell gave  $a = 16.7018(5) \text{ \AA}$ ,  $b = 16.7018(5) \text{ \AA}$ ,  $c = 9.6419(2) \text{ \AA}$ , and  $V = 2329.27(11) \text{ \AA}^3$ . Axial photographs and systematic absences were consistent with the compound having crystallized in the hexagonal space group *P6*<sub>2</sub>.

The structure was solved by a combination of direct methods and heavy atom using SIR 97. [REF 3]

All of the non-hydrogen atoms were refined with anisotropic displacement coefficients. Hydrogen atoms were either located, refined isotropically or assigned isotropic displacement coefficients  $U(\text{H}) = 1.2U(\text{C})$  or  $1.5U(\text{C}_{\text{methyl}})$ , and their coordinates were allowed to ride on their respective carbons using SHELXL97. [REF 4] The five-member ring carbon atoms (C10, C11) exhibit orientation disorder 50:50. There are also disordered hexanes solvent molecules in the lattice. The weighting scheme employed was  $w = 1/[\sigma^2(F_o^2) + (0.0992P)^2 + 1.0242P]$  where  $P = (F_o^2 + 2F_c^2)/3$ . The refinement converged to  $R1 = 0.0635$ ,  $wR2 = 0.1640$ , and  $S = 1.036$  for 2676 reflections with  $1 > 2\sigma(I)$ , and  $R1 = 0.0861$ ,  $wR2 = 0.1819$ , and  $S = 1.036$  for 3395 unique reflections and 257 parameters. [REF 5] The maximum  $\Delta/\sigma$  in the final cycle of the least-squares was 0, and the residual peaks on the final difference-Fourier map ranged from -0.196 to 0.393 e/ $\text{\AA}^3$ . Scattering factors were taken from the International Tables for Crystallography, Volume C. [REF 6, REF 7]

REF 1 COLLECT Data Collection Software. Nonius B.V. 1998.

REF 2 Otwinowski, Z.; Minor, W., "Processing of X-ray Diffraction Data Collected in Oscillation Mode", *Methods Enzymol.* 1997, 276, 307-326.

REF 3 SIR97 (Release 1.02) - A program for automatic solution and refinement of crystal structure. A. Altomare, M.C. Burla, M. Camalli, G. Cascarano, C. Giacovazzo, A. Guagliardi, A.G. G. Molitani, G. Polidori, and R. Spagna.

REF 4 SHELX97 [Includes SHELXS97, SHELXL97, CIFTAB ] - Sheldrick, G. M. (1997). *Programs for Crystal Structure Analysis (Release 97-2)*. University of Göttingen, Germany.

REF 5  $R1 = \Sigma( |F_o| - |F_c| ) / \Sigma |F_o|$ ,  $wR2 = [ \Sigma(w(F_o^2 - F_c^2)^2) / \Sigma(F_o^2)^2 ]^{1/2}$ , and  $S =$  Goodness-of-fit on  $F^2 = [ \Sigma( w(F_o^2 - F_c^2)^2 / (n-p) ) ]^{1/2}$ , where n is the number of reflections and p is the number of parameters refined.

REF 6 Maslen, E. N.; Fox, A. G.; O'Keefe, M. A., International Tables for Crystallography: Mathematical, Physical and Chemical Tables, Vol. C, Chapter 6, Wilson, A. J. C., Ed.; Kluwer, Dordrecht, The Netherlands, 1992; pp. 476-516.

REF 7 Creagh, D. C.; McAuley, W. J., International Tables for Crystallography: mathematical, Physical and Chemical tables, Vol. C, Chapter 4 Wilson, A. J. C., Ed.; Kluwer, Dordrecht, The Netherlands, 1992; pp. 206-222.

REF8 ORTEP3 for Windows - L. J. Farrugia, *J. Appl. Crystallogr.* **1997**, *30*, 565.

REF9 WinGX A Windows Program for Crystal Structure Analysis. L. J. Farrugia, University of Glasgow, Glasgow, 1998.

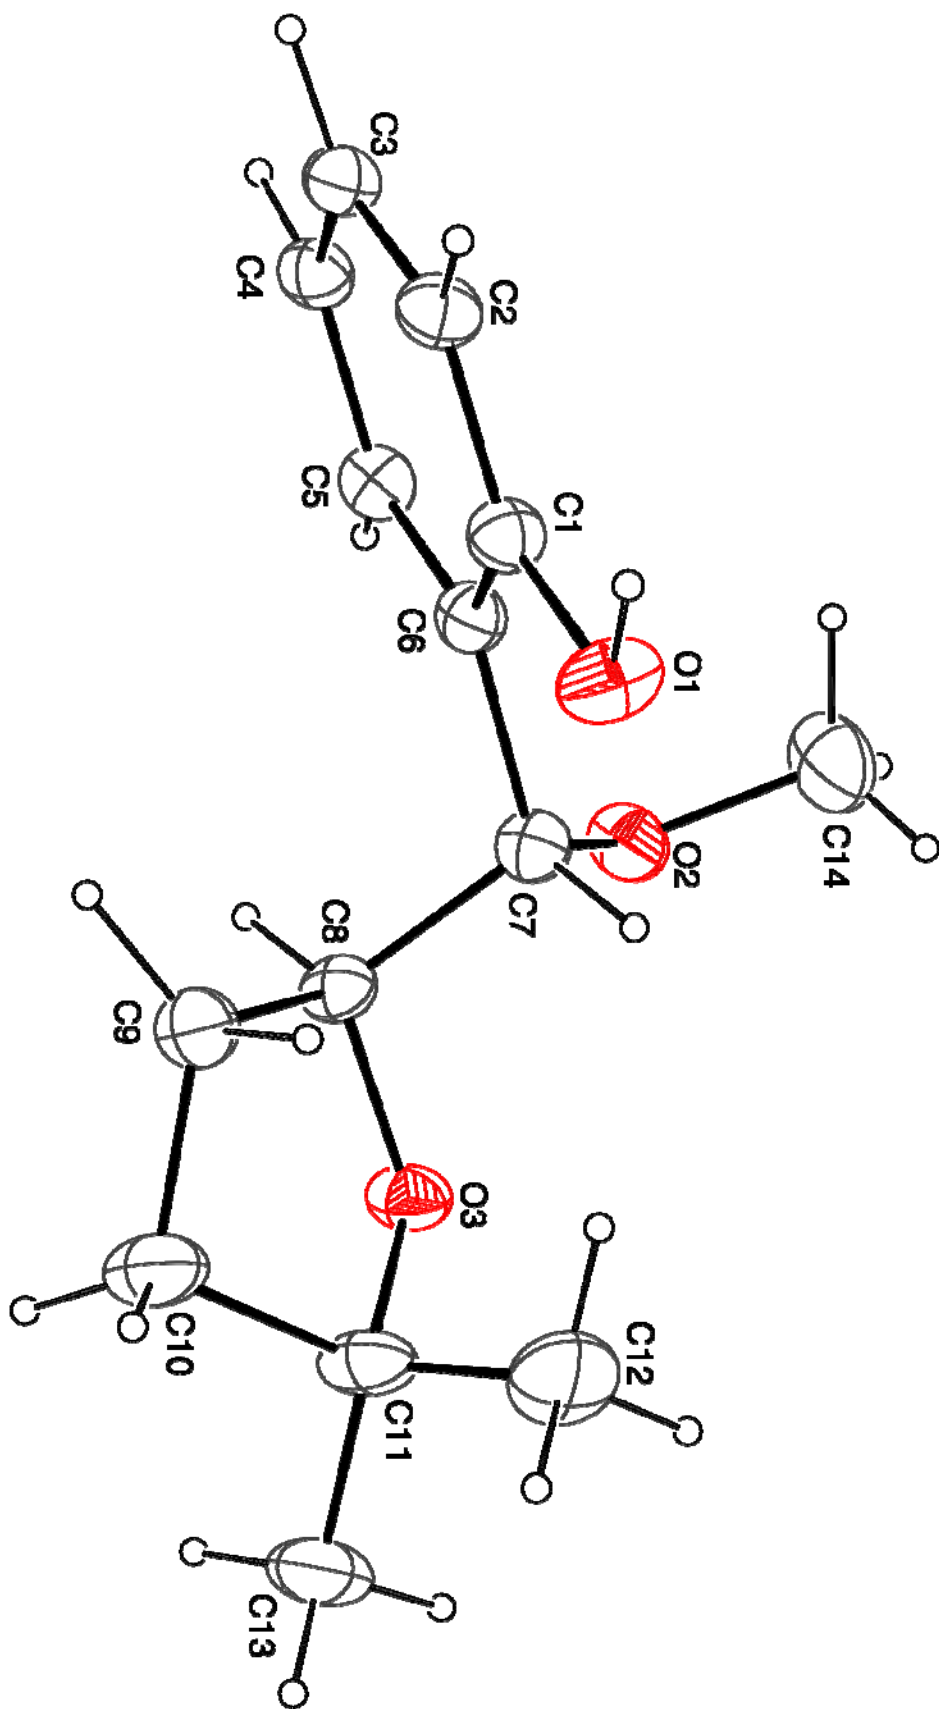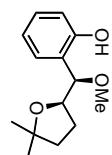

Table 1. Crystal data and structure refinement for mss032.

|                                   |                                             |           |
|-----------------------------------|---------------------------------------------|-----------|
| Identification code               | mss032                                      |           |
| Empirical formula                 | C15.50 H23.50 O3                            |           |
| Formula weight                    | 257.84                                      |           |
| Temperature                       | 105(1) K                                    |           |
| Wavelength                        | 0.71069 Å                                   |           |
| Crystal system                    | Hexagonal                                   |           |
| Space group                       | <b><i>P</i>6<sub>2</sub></b>                |           |
| Unit cell dimensions              | a = 16.7018(5) Å                            | ∠ = 90°.  |
|                                   | b = 16.7018(5) Å                            | ∠ = 90°.  |
|                                   | c = 9.6419(2) Å                             | ∠ = 120°. |
| Volume                            | 2329.27(11) Å <sup>3</sup>                  |           |
| Z                                 | 6                                           |           |
| Density (calculated)              | 1.103 Mg/m <sup>3</sup>                     |           |
| Absorption coefficient            | 0.075 mm <sup>-1</sup>                      |           |
| F(000)                            | 843                                         |           |
| Crystal size                      | 0.35 x 0.33 x 0.20 mm <sup>3</sup>          |           |
| Theta range for data collection   | 2.54 to 27.45°.                             |           |
| Index ranges                      | -21 ≤ h ≤ 21, -18 ≤ k ≤ 18, -10 ≤ l ≤ 12    |           |
| Reflections collected             | 3395                                        |           |
| Independent reflections           | 3395 [R(int) = 0.0000]                      |           |
| Completeness to theta = 27.45°    | 99.7 %                                      |           |
| Absorption correction             | Multi-scan                                  |           |
| Max. and min. transmission        | 0.9852 and 0.9743                           |           |
| Refinement method                 | Full-matrix least-squares on F <sup>2</sup> |           |
| Data / restraints / parameters    | 3395 / 4 / 257                              |           |
| Goodness-of-fit on F <sup>2</sup> | 1.029                                       |           |
| Final R indices [I > 2σ(I)]       | R1 = 0.0635, wR2 = 0.1640                   |           |
| R indices (all data)              | R1 = 0.0861, wR2 = 0.1819                   |           |
| Absolute structure parameter      | 0.1(18)                                     |           |
| Extinction coefficient            | 0.018(5)                                    |           |
| Largest diff. peak and hole       | 0.393 and -0.196 e.Å <sup>-3</sup>          |           |

Table 2. Atomic coordinates ( $\times 10^4$ ) and equivalent isotropic displacement parameters ( $\text{\AA}^2 \times 10^3$ ) for mss032.  $U(\text{eq})$  is defined as one third of the trace of the orthogonalized  $U^{ij}$  tensor.

|        | x        | y        | z         | $U(\text{eq})$ |
|--------|----------|----------|-----------|----------------|
| O(1)   | 3818(2)  | 1488(1)  | -421(3)   | 48(1)          |
| O(2)   | 3603(2)  | 3777(2)  | 3(2)      | 45(1)          |
| O(3)   | 3815(2)  | 3556(2)  | 2783(2)   | 42(1)          |
| C(1)   | 4476(2)  | 2268(2)  | -1069(3)  | 35(1)          |
| C(2)   | 5068(2)  | 2238(2)  | -2068(3)  | 37(1)          |
| C(3)   | 5726(2)  | 3040(2)  | -2714(3)  | 37(1)          |
| C(4)   | 5794(2)  | 3883(2)  | -2361(3)  | 37(1)          |
| C(5)   | 5213(2)  | 3909(2)  | -1359(3)  | 36(1)          |
| C(6)   | 4550(2)  | 3112(2)  | -700(3)   | 34(1)          |
| C(7)   | 3929(2)  | 3162(2)  | 411(3)    | 35(1)          |
| C(8)   | 4447(2)  | 3552(2)  | 1756(3)   | 35(1)          |
| C(9)   | 4842(2)  | 2994(2)  | 2412(3)   | 43(1)          |
| C(10)  | 4577(8)  | 2857(9)  | 3884(10)  | 57(3)          |
| C(11)  | 3645(6)  | 2830(7)  | 3865(8)   | 47(2)          |
| C(12)  | 2862(6)  | 1955(6)  | 3442(10)  | 66(3)          |
| C(13)  | 3481(9)  | 3168(11) | 5216(10)  | 69(3)          |
| C(10') | 4954(7)  | 3399(8)  | 3907(9)   | 53(2)          |
| C(11') | 4102(6)  | 3501(6)  | 4147(7)   | 47(2)          |
| C(12') | 4348(6)  | 4403(6)  | 4877(8)   | 69(2)          |
| C(13') | 3337(9)  | 2687(8)  | 4838(14)  | 72(3)          |
| C(14)  | 2924(3)  | 3409(4)  | -1044(5)  | 68(1)          |
| C(15)  | 1666(4)  | 845(4)   | 2063(8)   | 53(2)          |
| C(16)  | 1338(4)  | 743(5)   | 480(7)    | 51(2)          |
| C(17)  | 1546(17) | 434(14)  | -1036(15) | 49(5)          |
| C(18)  | 1573(7)  | 951(6)   | -2456(9)  | 43(2)          |



Table 3. Bond lengths [ $\text{\AA}$ ] and angles [ $^\circ$ ] for mss032.

|                   |           |
|-------------------|-----------|
| O(1)-C(1)         | 1.365(4)  |
| O(2)-C(14)        | 1.410(4)  |
| O(2)-C(7)         | 1.436(3)  |
| O(3)-C(11')       | 1.419(7)  |
| O(3)-C(8)         | 1.450(3)  |
| O(3)-C(11)        | 1.515(7)  |
| C(1)-C(6)         | 1.398(4)  |
| C(1)-C(2)         | 1.399(4)  |
| C(2)-C(3)         | 1.385(4)  |
| C(3)-C(4)         | 1.398(4)  |
| C(4)-C(5)         | 1.385(4)  |
| C(5)-C(6)         | 1.390(4)  |
| C(6)-C(7)         | 1.522(4)  |
| C(7)-C(8)         | 1.514(4)  |
| C(8)-C(9)         | 1.522(4)  |
| C(9)-C(10)        | 1.471(10) |
| C(9)-C(10')       | 1.563(9)  |
| C(10)-C(11)       | 1.535(12) |
| C(11)-C(12)       | 1.449(14) |
| C(11)-C(13)       | 1.498(14) |
| C(10')-C(11')     | 1.533(10) |
| C(11')-C(13')     | 1.478(14) |
| C(11')-C(12')     | 1.522(11) |
| C(15)-C(16)       | 1.602(10) |
| C(16)-C(17)       | 1.645(15) |
| C(17)-C(18)       | 1.607(15) |
|                   |           |
| C(14)-O(2)-C(7)   | 113.3(3)  |
| C(11')-O(3)-C(8)  | 111.2(3)  |
| C(11')-O(3)-C(11) | 40.8(4)   |
| C(8)-O(3)-C(11)   | 108.2(3)  |
| O(1)-C(1)-C(6)    | 117.9(2)  |
| O(1)-C(1)-C(2)    | 121.8(2)  |
| C(6)-C(1)-C(2)    | 120.3(3)  |
| C(3)-C(2)-C(1)    | 120.5(3)  |

|                      |           |
|----------------------|-----------|
| C(2)-C(3)-C(4)       | 119.4(3)  |
| C(5)-C(4)-C(3)       | 119.8(3)  |
| C(4)-C(5)-C(6)       | 121.6(3)  |
| C(5)-C(6)-C(1)       | 118.4(3)  |
| C(5)-C(6)-C(7)       | 120.5(2)  |
| C(1)-C(6)-C(7)       | 121.1(2)  |
| O(2)-C(7)-C(8)       | 105.5(2)  |
| O(2)-C(7)-C(6)       | 111.1(2)  |
| C(8)-C(7)-C(6)       | 111.6(2)  |
| O(3)-C(8)-C(7)       | 109.0(2)  |
| O(3)-C(8)-C(9)       | 105.0(2)  |
| C(7)-C(8)-C(9)       | 115.0(2)  |
| C(10)-C(9)-C(8)      | 107.9(5)  |
| C(10)-C(9)-C(10')    | 30.5(4)   |
| C(8)-C(9)-C(10')     | 96.5(4)   |
| C(9)-C(10)-C(11)     | 102.4(7)  |
| C(12)-C(11)-C(13)    | 112.5(9)  |
| C(12)-C(11)-O(3)     | 109.0(6)  |
| C(13)-C(11)-O(3)     | 107.1(8)  |
| C(12)-C(11)-C(10)    | 115.0(8)  |
| C(13)-C(11)-C(10)    | 110.7(8)  |
| O(3)-C(11)-C(10)     | 101.7(6)  |
| C(11')-C(10')-C(9)   | 105.7(6)  |
| O(3)-C(11')-C(13')   | 108.2(8)  |
| O(3)-C(11')-C(12')   | 107.3(5)  |
| C(13')-C(11')-C(12') | 112.5(8)  |
| O(3)-C(11')-C(10')   | 103.3(5)  |
| C(13')-C(11')-C(10') | 112.9(7)  |
| C(12')-C(11')-C(10') | 111.9(7)  |
| C(16)-C(15)-C(17)#1  | 86.0(6)   |
| C(15)-C(16)-C(17)    | 140.0(9)  |
| C(18)-C(17)-C(16)    | 122.8(12) |
| C(18)-C(17)-C(15)#2  | 109.9(11) |
| C(16)-C(17)-C(15)#2  | 110.7(10) |

---

Symmetry transformations used to generate equivalent atoms:

#1  $x-y, x, z+1/3$  #2  $y, -x+y, z-1/3$

Table 4. Anisotropic displacement parameters ( $\text{\AA}^2 \times 10^3$ ) for mss032. The anisotropic displacement factor exponent takes the form:  $-2\sigma^2 [ h^2 a^{*2} U^{11} + \dots + 2 h k a^* b^* U^{12} ]$

|        | U <sup>11</sup> | U <sup>22</sup> | U <sup>33</sup> | U <sup>23</sup> | U <sup>13</sup> | U <sup>12</sup> |
|--------|-----------------|-----------------|-----------------|-----------------|-----------------|-----------------|
| O(1)   | 52(1)           | 30(1)           | 56(1)           | 2(1)            | 17(1)           | 17(1)           |
| O(2)   | 52(1)           | 59(1)           | 40(1)           | -5(1)           | -5(1)           | 41(1)           |
| O(3)   | 50(1)           | 56(1)           | 32(1)           | 3(1)            | 7(1)            | 37(1)           |
| C(1)   | 37(2)           | 33(1)           | 35(2)           | -2(1)           | 1(1)            | 17(1)           |
| C(2)   | 44(2)           | 34(2)           | 35(2)           | -4(1)           | 1(1)            | 21(1)           |
| C(3)   | 39(2)           | 45(2)           | 31(1)           | -4(1)           | 0(1)            | 23(1)           |
| C(4)   | 41(2)           | 40(2)           | 30(1)           | 4(1)            | 0(1)            | 22(1)           |
| C(5)   | 43(2)           | 33(1)           | 37(2)           | -1(1)           | -2(1)           | 24(1)           |
| C(6)   | 36(1)           | 38(2)           | 33(2)           | -1(1)           | -2(1)           | 22(1)           |
| C(7)   | 38(2)           | 36(2)           | 37(2)           | 0(1)            | 1(1)            | 24(1)           |
| C(8)   | 37(2)           | 40(2)           | 36(1)           | 4(1)            | 6(1)            | 26(1)           |
| C(9)   | 46(2)           | 51(2)           | 42(2)           | 7(1)            | 2(1)            | 30(2)           |
| C(10)  | 64(6)           | 85(7)           | 43(4)           | 22(6)           | 18(4)           | 51(6)           |
| C(11)  | 60(5)           | 61(6)           | 34(4)           | 21(4)           | 16(3)           | 41(4)           |
| C(12)  | 67(5)           | 55(5)           | 63(5)           | 28(4)           | 14(4)           | 22(4)           |
| C(13)  | 77(7)           | 107(10)         | 32(5)           | 17(5)           | 13(4)           | 53(8)           |
| C(10') | 67(6)           | 85(6)           | 35(3)           | 0(4)            | -1(4)           | 58(5)           |
| C(11') | 67(4)           | 59(5)           | 37(3)           | 10(3)           | 6(3)            | 48(4)           |
| C(12') | 97(6)           | 85(6)           | 50(4)           | -22(4)          | -20(4)          | 66(5)           |
| C(13') | 88(7)           | 75(7)           | 75(8)           | 22(6)           | 11(6)           | 57(7)           |
| C(14)  | 66(2)           | 101(3)          | 64(2)           | -20(2)          | -19(2)          | 61(2)           |
| C(15)  | 42(3)           | 23(3)           | 91(5)           | -5(3)           | 27(3)           | 15(2)           |
| C(16)  | 34(3)           | 42(3)           | 62(4)           | -23(3)          | 8(3)            | 8(3)            |
| C(18)  | 56(5)           | 36(4)           | 39(5)           | -13(3)          | 8(4)            | 23(4)           |

Table 5. Hydrogen coordinates ( $\times 10^4$ ) and isotropic displacement parameters ( $\text{\AA}^2 \times 10^3$ ) for mss032.

|        | x        | y        | z         | U(eq)  |
|--------|----------|----------|-----------|--------|
| H(10A) | 5036     | 3375     | 4459      | 69     |
| H(10B) | 4509     | 2269     | 4237      | 69     |
| H(12A) | 2979     | 1791     | 2518      | 98     |
| H(12B) | 2305     | 2010     | 3415      | 98     |
| H(12C) | 2774     | 1474     | 4106      | 98     |
| H(13A) | 4031     | 3754     | 5466      | 103    |
| H(13B) | 3355     | 2709     | 5941      | 103    |
| H(13C) | 2949     | 3262     | 5125      | 103    |
| H(10C) | 4979     | 2975     | 4600      | 64     |
| H(10D) | 5527     | 4006     | 3978      | 64     |
| H(12D) | 4835     | 4923     | 4356      | 103    |
| H(12E) | 4568     | 4397     | 5816      | 103    |
| H(12F) | 3799     | 4472     | 4927      | 103    |
| H(13D) | 3202     | 2126     | 4329      | 108    |
| H(13E) | 2785     | 2751     | 4853      | 108    |
| H(13F) | 3517     | 2645     | 5791      | 108    |
| H(14A) | 2729     | 3858     | -1276     | 103    |
| H(14B) | 2389     | 2836     | -712      | 103    |
| H(14C) | 3180     | 3278     | -1871     | 103    |
| H(15A) | 2345     | 1188     | 2191      | 63     |
| H(15B) | 1373     | 258      | 2592      | 63     |
| H(16A) | 1432     | 1366     | 280       | 61     |
| H(16B) | 660      | 341      | 564       | 61     |
| H(17A) | 2191     | 546      | -943      | 59     |
| H(18A) | 1719     | 665      | -3230     | 65     |
| H(18B) | 2048     | 1605     | -2390     | 65     |
| H(18C) | 969      | 898      | -2615     | 65     |
| H(1)   | 3870(30) | 940(30)  | -840(60)  | 83(15) |
| H(2)   | 5040(30) | 1680(30) | -2330(50) | 55(10) |
| H(3)   | 6140(20) | 2990(20) | -3360(40) | 33(8)  |
| H(4)   | 6260(30) | 4450(30) | -2920(50) | 70(12) |

|       |          |          |           |       |
|-------|----------|----------|-----------|-------|
| H(5)  | 5230(20) | 4460(20) | -1130(30) | 30(7) |
| H(7)  | 3380(20) | 2540(20) | 670(40)   | 41(9) |
| H(8)  | 4990(20) | 4260(20) | 1540(30)  | 30(7) |
| H(9A) | 5470(20) | 3110(20) | 1950(30)  | 36    |
| H(9B) | 4360(20) | 2290(20) | 2220(40)  | 36    |

Table 6. Torsion angles [°] for mss032.

|                       |           |
|-----------------------|-----------|
| O(1)-C(1)-C(2)-C(3)   | 179.7(3)  |
| C(6)-C(1)-C(2)-C(3)   | -0.7(4)   |
| C(1)-C(2)-C(3)-C(4)   | -0.2(4)   |
| C(2)-C(3)-C(4)-C(5)   | 0.9(4)    |
| C(3)-C(4)-C(5)-C(6)   | -0.8(4)   |
| C(4)-C(5)-C(6)-C(1)   | 0.0(4)    |
| C(4)-C(5)-C(6)-C(7)   | 179.2(3)  |
| O(1)-C(1)-C(6)-C(5)   | -179.6(3) |
| C(2)-C(1)-C(6)-C(5)   | 0.7(4)    |
| O(1)-C(1)-C(6)-C(7)   | 1.2(4)    |
| C(2)-C(1)-C(6)-C(7)   | -178.5(3) |
| C(14)-O(2)-C(7)-C(8)  | -165.8(3) |
| C(14)-O(2)-C(7)-C(6)  | 73.2(3)   |
| C(5)-C(6)-C(7)-O(2)   | 43.1(3)   |
| C(1)-C(6)-C(7)-O(2)   | -137.7(3) |
| C(5)-C(6)-C(7)-C(8)   | -74.3(3)  |
| C(1)-C(6)-C(7)-C(8)   | 104.9(3)  |
| C(11')-O(3)-C(8)-C(7) | 153.3(4)  |
| C(11)-O(3)-C(8)-C(7)  | 109.9(5)  |
| C(11')-O(3)-C(8)-C(9) | 29.7(5)   |
| C(11)-O(3)-C(8)-C(9)  | -13.7(5)  |
| O(2)-C(7)-C(8)-O(3)   | 61.1(3)   |
| C(6)-C(7)-C(8)-O(3)   | -178.2(2) |
| O(2)-C(7)-C(8)-C(9)   | 178.6(2)  |
| C(6)-C(7)-C(8)-C(9)   | -60.7(3)  |
| O(3)-C(8)-C(9)-C(10)  | -11.4(6)  |
| C(7)-C(8)-C(9)-C(10)  | -131.1(6) |
| O(3)-C(8)-C(9)-C(10') | -40.4(5)  |
| C(7)-C(8)-C(9)-C(10') | -160.1(5) |

|                           |            |
|---------------------------|------------|
| C(8)-C(9)-C(10)-C(11)     | 31.0(9)    |
| C(10')-C(9)-C(10)-C(11)   | 102.6(13)  |
| C(11')-O(3)-C(11)-C(12)   | 168.7(9)   |
| C(8)-O(3)-C(11)-C(12)     | -89.6(6)   |
| C(11')-O(3)-C(11)-C(13)   | 46.8(8)    |
| C(8)-O(3)-C(11)-C(13)     | 148.5(7)   |
| C(11')-O(3)-C(11)-C(10)   | -69.3(8)   |
| C(8)-O(3)-C(11)-C(10)     | 32.4(7)    |
| C(9)-C(10)-C(11)-C(12)    | 79.8(9)    |
| C(9)-C(10)-C(11)-C(13)    | -151.4(10) |
| C(9)-C(10)-C(11)-O(3)     | -37.9(9)   |
| C(10)-C(9)-C(10')-C(11')  | -75.9(12)  |
| C(8)-C(9)-C(10')-C(11')   | 38.7(7)    |
| C(8)-O(3)-C(11')-C(13')   | -123.3(6)  |
| C(11)-O(3)-C(11')-C(13')  | -29.8(7)   |
| C(8)-O(3)-C(11')-C(12')   | 115.0(5)   |
| C(11)-O(3)-C(11')-C(12')  | -151.4(9)  |
| C(8)-O(3)-C(11')-C(10')   | -3.4(7)    |
| C(11)-O(3)-C(11')-C(10')  | 90.2(7)    |
| C(9)-C(10')-C(11')-O(3)   | -23.3(8)   |
| C(9)-C(10')-C(11')-C(13') | 93.3(10)   |
| C(9)-C(10')-C(11')-C(12') | -138.4(7)  |
| C(17)#1-C(15)-C(16)-C(17) | 164.1(17)  |
| C(15)-C(16)-C(17)-C(18)   | -141.6(12) |
| C(15)-C(16)-C(17)-C(15)#2 | 85.8(17)   |

---

Symmetry transformations used to generate equivalent atoms:

#1  $x-y, x, z+1/3$  #2  $y, -x+y, z-1/3$

## X-Ray crystal structure data for Jones oxidation product S15:

### Crystal Structure Report

#### Experimental:

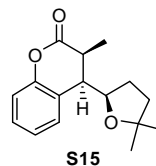

A colorless prism shaped crystal 0.33 x 0.33 x 0.30 mm in size was mounted on a glass fiber with traces of viscous oil and then transferred to a Nonius KappaCCD diffractometer equipped with Mo K $\alpha$  radiation ( $\lambda = 0.71073 \text{ \AA}$ ). Ten frames of data were collected at 150(1) K with an oscillation range of 1 deg/frame and an exposure time of 20 sec/frame. [REF 1] Indexing and unit cell refinement based on all observed reflection from those ten frames, indicated a monoclinic *C* lattice. A total of 11462 reflections ( $\Theta_{\max} = 27.5^\circ$ ) were indexed, integrated and corrected for Lorentz, polarization and absorption effects using DENZO-SMN and SCALEPAC. [REF 2] Post refinement of the unit cell gave  $a = 21.3641(6) \text{ \AA}$ ,  $b = 10.9638(4) \text{ \AA}$ ,  $c = 23.4509(5) \text{ \AA}$ ,  $\beta = 90.8210(17)$ , and  $V = 5492.4(3) \text{ \AA}^3$ . Axial photographs and systematic absences were consistent with the compound having crystallized in the monoclinic space group *C* 2/*c*.

The structure was solved by a combination of direct methods and heavy atom using SIR 97. [REF 3]

All of the non-hydrogen atoms were refined with anisotropic displacement coefficients. Hydrogen atoms were located and refined isotropically using SHELXL97. [REF 4] The weighting scheme employed was  $w = 1/[\sigma^2(F_o^2) + (0.0576P)^2 + 1.7804P]$  where  $P = (F_o^2 + 2F_c^2)/3$ . The refinement converged to  $R1 = 0.0473$ ,  $wR2 = 0.1037$ , and  $S = 1.0150$  for 4096 reflections with  $1 > 2\sigma(I)$ , and  $R1 = 0.0902$ ,  $wR2 = 0.1225$ , and  $S = 1.0150$  for 6287 unique reflections and 503 parameters. [REF 5] The maximum  $\Delta/\sigma$  in the final cycle of the least-squares was 0, and the residual peaks on the final difference-Fourier map ranged from -0.234 to 0.187 e/ $\text{\AA}^3$ . Scattering factors were taken from the International Tables for Crystallography, Volume C. [REF 6, REF 7]

REF 1 COLLECT Data Collection Software. Nonius B.V. 1998.

REF 2 Otwinowski, Z.; Minor, W., "Processing of X-ray Diffraction Data Collected in Oscillation Mode", *Methods Enzymol.* 1997, 276, 307-326.

REF 3 SIR97 (Release 1.02) - A program for automatic solution and refinement of crystal structure. A. Altomare, M.C. Burla, M. Camalli, G. Cascarano, C. Giacovazzo, A. Guagliardi, A.G. G. Molitani, G. Polidori, and R. Spagna.

REF 4 SHELX97 [Includes SHELXS97, SHELXL97, CIFTAB ] - Sheldrick, G. M. (1997). Programs for Crystal Structure Analysis (Release 97-2). University of Göttingen, Germany.

REF 5  $R1 = \Sigma ( |F_o| - |F_c| ) / \Sigma |F_o|$ ,  $wR2 = [ \Sigma (w(F_o^2 - F_c^2))^2 / \Sigma (F_o^2)^2 ]^{1/2}$ , and  $S = \text{Goodness-of-fit on } F^2 = [ \Sigma (w(F_o^2 - F_c^2))^2 / (n-p) ]^{1/2}$ , where  $n$  is the number of reflections and  $p$  is the number of parameters refined.

REF 6 Maslen, E. N.; Fox, A. G.; O'Keefe, M. A., International Tables for Crystallography: Mathematical, Physical and Chemical Tables, Vol. C, Chapter 6, Wilson, A. J. C., Ed.; Kluwer, Dordrecht, The Netherlands, 1992; pp. 476-516.

REF 7 Creagh, D. C.; McAuley, W. J., International Tables for Crystallography: mathematical, Physical and Chemical tables, Vol. C, Chapter 4 Wilson, A. J. C., Ed.; Kluwer, Dordrecht, The Netherlands, 1992; pp. 206-222.

REF8 ORTEP3 for Windows - L. J. Farrugia, *J. Appl. Crystallogr.* **1997**, *30*, 565.

REF9 WinGX A Windows Program for Crystal Structure Analysis. L. J. Farrugia, University of Glasgow, Glasgow, 1998.



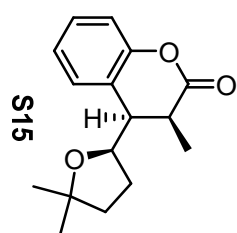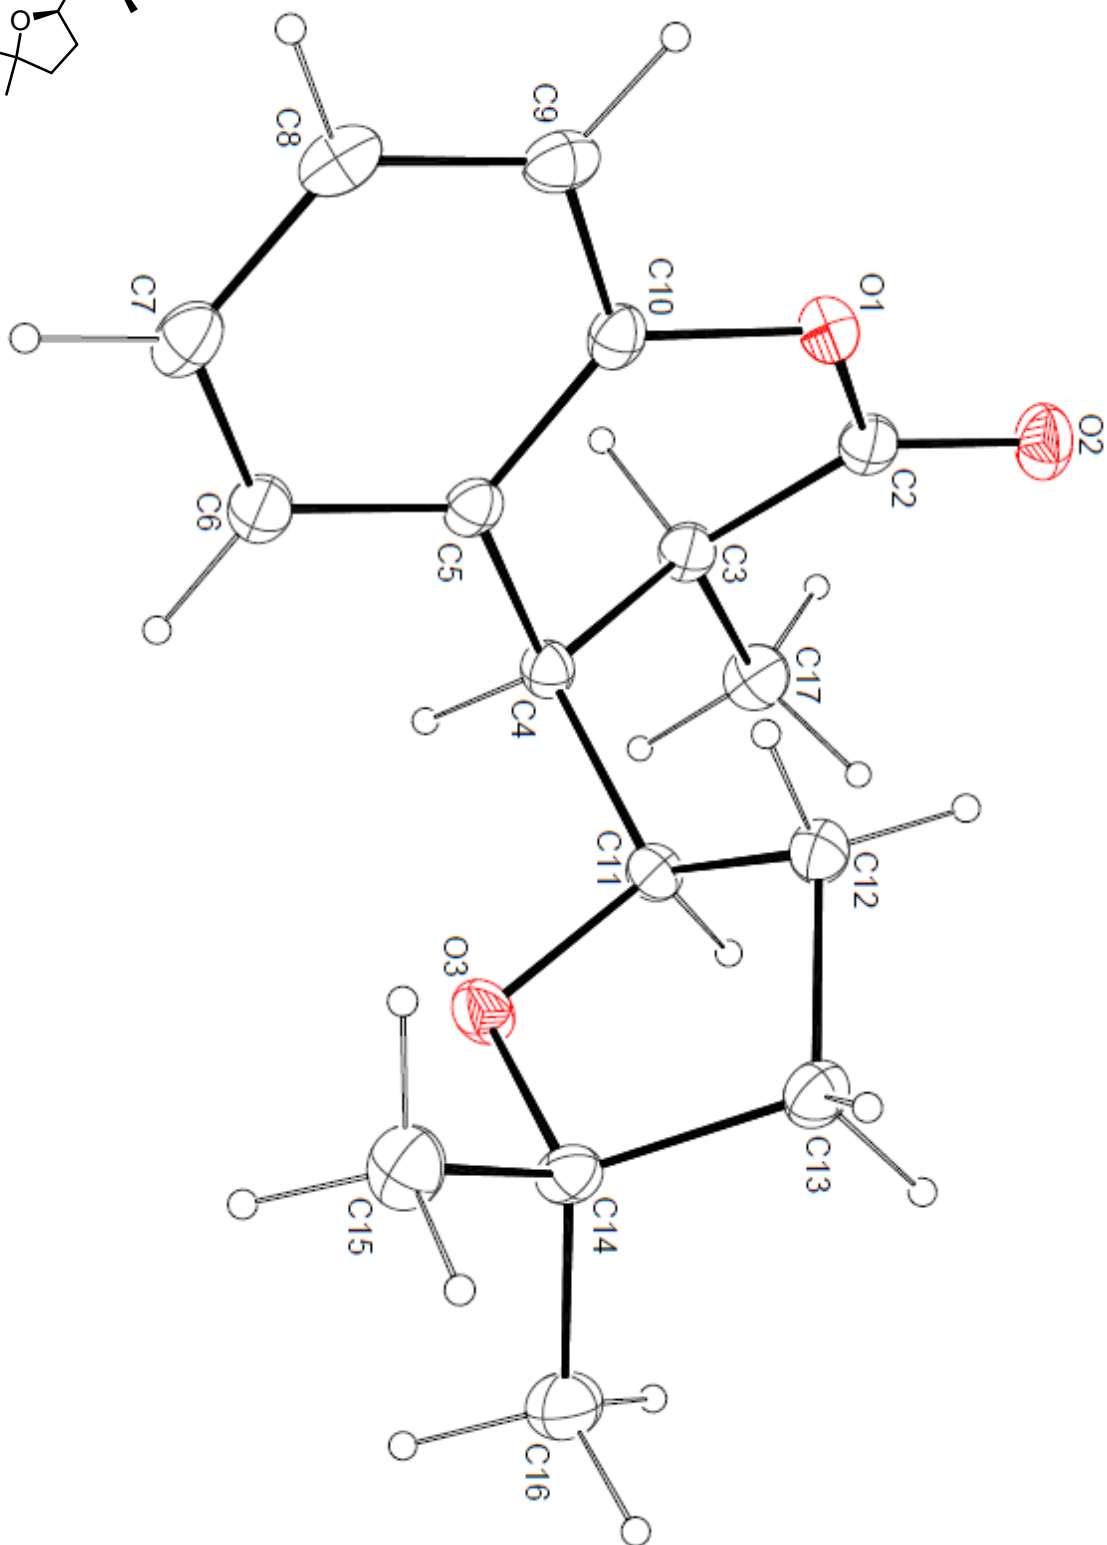

Table 1. Crystal data and structure refinement for mss034.

|                                   |                                                |                   |
|-----------------------------------|------------------------------------------------|-------------------|
| Identification code               | mss034                                         |                   |
| Empirical formula                 | C <sub>16</sub> H <sub>20</sub> O <sub>3</sub> |                   |
| Formula weight                    | 260.32                                         |                   |
| Temperature                       | 150(1) K                                       |                   |
| Wavelength                        | 0.71073 Å                                      |                   |
| Crystal system                    | Monoclinic                                     |                   |
| Space group                       | C 2/c                                          |                   |
| Unit cell dimensions              | a = 21.3641(6) Å                               | α = 90°.          |
|                                   | b = 10.9638(4) Å                               | β = 90.8210(17)°. |
|                                   | c = 23.4509(5) Å                               | γ = 90°.          |
| Volume                            | 5492.4(3) Å <sup>3</sup>                       |                   |
| Z                                 | 16                                             |                   |
| Density (calculated)              | 1.259 Mg/m <sup>3</sup>                        |                   |
| Absorption coefficient            | 0.086 mm <sup>-1</sup>                         |                   |
| F(000)                            | 2240                                           |                   |
| Crystal size                      | 0.33 x 0.33 x 0.30 mm <sup>3</sup>             |                   |
| Theta range for data collection   | 1.91 to 27.50°.                                |                   |
| Index ranges                      | -27 ≤ h ≤ 27, -14 ≤ k ≤ 14, -30 ≤ l ≤ 30       |                   |
| Reflections collected             | 11462                                          |                   |
| Independent reflections           | 6287 [R(int) = 0.0366]                         |                   |
| Completeness to theta = 27.50°    | 99.3 %                                         |                   |
| Absorption correction             | Multi-scan                                     |                   |
| Max. and min. transmission        | 0.9748 and 0.9723                              |                   |
| Refinement method                 | Full-matrix least-squares on F <sup>2</sup>    |                   |
| Data / restraints / parameters    | 6287 / 0 / 503                                 |                   |
| Goodness-of-fit on F <sup>2</sup> | 1.015                                          |                   |
| Final R indices [I > 2σ(I)]       | R1 = 0.0473, wR2 = 0.1037                      |                   |
| R indices (all data)              | R1 = 0.0902, wR2 = 0.1225                      |                   |
| Largest diff. peak and hole       | 0.187 and -0.234 e.Å <sup>-3</sup>             |                   |

Table 2. Atomic coordinates ( $\times 10^4$ ) and equivalent isotropic displacement parameters ( $\text{\AA}^2 \times 10^3$ ) for mss034.  $U(\text{eq})$  is defined as one third of the trace of the orthogonalized  $U^{ij}$  tensor.

|        | x       | y        | z       | $U(\text{eq})$ |
|--------|---------|----------|---------|----------------|
| C(2)   | 152(1)  | 1308(2)  | 1829(1) | 26(1)          |
| C(2A)  | 2639(1) | -1115(2) | 1928(1) | 26(1)          |
| C(3)   | 711(1)  | 477(2)   | 1798(1) | 25(1)          |
| C(3A)  | 3172(1) | -1996(1) | 1875(1) | 23(1)          |
| C(4)   | 1168(1) | 931(1)   | 1342(1) | 22(1)          |
| C(4A)  | 3629(1) | -1579(1) | 1408(1) | 22(1)          |
| C(5)   | 1331(1) | 2231(1)  | 1486(1) | 23(1)          |
| C(5A)  | 3825(1) | -295(1)  | 1546(1) | 22(1)          |
| C(6)   | 1918(1) | 2740(2)  | 1398(1) | 28(1)          |
| C(6A)  | 4416(1) | 174(2)   | 1430(1) | 27(1)          |
| C(7)   | 2041(1) | 3947(2)  | 1543(1) | 31(1)          |
| C(7A)  | 4574(1) | 1361(2)  | 1584(1) | 33(1)          |
| C(8)   | 1577(1) | 4660(2)  | 1781(1) | 31(1)          |
| C(8A)  | 4143(1) | 2099(2)  | 1854(1) | 34(1)          |
| C(9)   | 990(1)  | 4170(2)  | 1879(1) | 29(1)          |
| C(9A)  | 3550(1) | 1658(2)  | 1970(1) | 30(1)          |
| C(10)  | 879(1)  | 2966(1)  | 1731(1) | 24(1)          |
| C(10A) | 3403(1) | 476(1)   | 1813(1) | 24(1)          |
| C(11)  | 917(1)  | 779(2)   | 726(1)  | 22(1)          |
| C(11A) | 3370(1) | -1719(1) | 796(1)  | 23(1)          |
| C(12)  | 463(1)  | 1726(2)  | 491(1)  | 26(1)          |
| C(12A) | 2936(1) | -737(2)  | 562(1)  | 26(1)          |
| C(13)  | 552(1)  | 1581(2)  | -151(1) | 28(1)          |
| C(13A) | 3027(1) | -873(2)  | -81(1)  | 29(1)          |
| C(14)  | 1242(1) | 1212(1)  | -211(1) | 24(1)          |
| C(14A) | 3709(1) | -1287(1) | -138(1) | 25(1)          |
| C(15)  | 1660(1) | 2265(2)  | -376(1) | 35(1)          |
| C(15A) | 4150(1) | -258(2)  | -291(1) | 37(1)          |
| C(16)  | 1322(1) | 143(2)   | -614(1) | 36(1)          |
| C(16A) | 3776(1) | -2345(2) | -552(1) | 38(1)          |
| C(17)  | 517(1)  | -853(2)  | 1742(1) | 32(1)          |

|        |         |          |         |       |
|--------|---------|----------|---------|-------|
| C(17A) | 2948(1) | -3307(2) | 1823(1) | 32(1) |
| O(1)   | 269(1)  | 2537(1)  | 1818(1) | 28(1) |
| O(1A)  | 2787(1) | 101(1)   | 1918(1) | 27(1) |
| O(2)   | -385(1) | 995(1)   | 1871(1) | 34(1) |
| O(2A)  | 2096(1) | -1373(1) | 1991(1) | 38(1) |
| O(3)   | 1444(1) | 844(1)   | 358(1)  | 28(1) |
| O(3A)  | 3899(1) | -1701(1) | 427(1)  | 29(1) |

---

Table 3. Bond lengths [ $\text{\AA}$ ] and angles [ $^\circ$ ] for mss034.

---

|              |            |
|--------------|------------|
| C(2)-O(2)    | 1.2016(18) |
| C(2)-O(1)    | 1.371(2)   |
| C(2)-C(3)    | 1.506(2)   |
| C(2A)-O(2A)  | 1.2032(18) |
| C(2A)-O(1A)  | 1.3705(19) |
| C(2A)-C(3A)  | 1.501(2)   |
| C(3)-C(17)   | 1.521(2)   |
| C(3)-C(4)    | 1.5406(19) |
| C(3)-H(3)    | 0.993(15)  |
| C(3A)-C(17A) | 1.520(2)   |
| C(3A)-C(4A)  | 1.547(2)   |
| C(3A)-H(3A)  | 1.007(16)  |
| C(4)-C(5)    | 1.504(2)   |
| C(4)-C(11)   | 1.541(2)   |
| C(4)-H(4)    | 1.003(16)  |
| C(4A)-C(5A)  | 1.502(2)   |
| C(4A)-C(11A) | 1.538(2)   |
| C(4A)-H(4A)  | 0.985(15)  |
| C(5)-C(10)   | 1.388(2)   |
| C(5)-C(6)    | 1.392(2)   |
| C(5A)-C(10A) | 1.392(2)   |
| C(5A)-C(6A)  | 1.394(2)   |
| C(6)-C(7)    | 1.390(2)   |
| C(6)-H(6)    | 0.991(17)  |
| C(6A)-C(7A)  | 1.391(2)   |
| C(6A)-H(6A)  | 1.013(17)  |
| C(7)-C(8)    | 1.387(2)   |
| C(7)-H(7)    | 0.978(17)  |
| C(7A)-C(8A)  | 1.386(2)   |
| C(7A)-H(7A)  | 0.981(18)  |
| C(8)-C(9)    | 1.385(2)   |
| C(8)-H(8)    | 0.992(19)  |
| C(8A)-C(9A)  | 1.386(2)   |
| C(8A)-H(8A)  | 1.002(19)  |

|               |            |
|---------------|------------|
| C(9)-C(10)    | 1.385(2)   |
| C(9)-H(9)     | 0.983(17)  |
| C(9A)-C(10A)  | 1.383(2)   |
| C(9A)-H(9A)   | 0.953(17)  |
| C(10)-O(1)    | 1.4020(18) |
| C(10A)-O(1A)  | 1.4046(18) |
| C(11)-O(3)    | 1.4304(16) |
| C(11)-C(12)   | 1.519(2)   |
| C(11)-H(11)   | 1.041(16)  |
| C(11A)-O(3A)  | 1.4323(17) |
| C(11A)-C(12A) | 1.519(2)   |
| C(11A)-H(11A) | 1.029(16)  |
| C(12)-C(13)   | 1.527(2)   |
| C(12)-H(12A)  | 1.032(18)  |
| C(12)-H(12B)  | 0.968(17)  |
| C(12A)-C(13A) | 1.529(2)   |
| C(12A)-H(12C) | 1.008(17)  |
| C(12A)-H(12D) | 0.984(16)  |
| C(13)-C(14)   | 1.538(2)   |
| C(13)-H(13A)  | 0.994(18)  |
| C(13)-H(13B)  | 1.003(17)  |
| C(13A)-C(14A) | 1.533(2)   |
| C(13A)-H(13C) | 0.987(19)  |
| C(13A)-H(13D) | 1.004(18)  |
| C(14)-O(3)    | 1.4535(17) |
| C(14)-C(15)   | 1.513(2)   |
| C(14)-C(16)   | 1.518(2)   |
| C(14A)-O(3A)  | 1.4516(17) |
| C(14A)-C(15A) | 1.516(2)   |
| C(14A)-C(16A) | 1.521(2)   |
| C(15)-H(15A)  | 1.00(2)    |
| C(15)-H(15B)  | 0.992(19)  |
| C(15)-H(15C)  | 0.99(2)    |
| C(15A)-H(15D) | 1.01(2)    |
| C(15A)-H(15E) | 0.99(2)    |
| C(15A)-H(15F) | 1.01(2)    |

|                    |            |
|--------------------|------------|
| C(16)-H(16A)       | 1.02(2)    |
| C(16)-H(16B)       | 1.00(2)    |
| C(16)-H(16C)       | 1.022(19)  |
| C(16A)-H(16D)      | 1.00(2)    |
| C(16A)-H(16E)      | 1.042(19)  |
| C(16A)-H(16F)      | 0.99(2)    |
| C(17)-H(17A)       | 1.006(18)  |
| C(17)-H(17B)       | 0.972(17)  |
| C(17)-H(17C)       | 1.021(19)  |
| C(17A)-H(17D)      | 0.990(18)  |
| C(17A)-H(17E)      | 1.013(17)  |
| C(17A)-H(17F)      | 1.037(19)  |
| O(2)-C(2)-O(1)     | 117.23(14) |
| O(2)-C(2)-C(3)     | 126.16(15) |
| O(1)-C(2)-C(3)     | 116.60(13) |
| O(2A)-C(2A)-O(1A)  | 116.97(14) |
| O(2A)-C(2A)-C(3A)  | 126.36(15) |
| O(1A)-C(2A)-C(3A)  | 116.65(13) |
| C(2)-C(3)-C(17)    | 111.66(14) |
| C(2)-C(3)-C(4)     | 110.46(12) |
| C(17)-C(3)-C(4)    | 115.18(13) |
| C(2)-C(3)-H(3)     | 105.2(9)   |
| C(17)-C(3)-H(3)    | 107.9(9)   |
| C(4)-C(3)-H(3)     | 105.7(8)   |
| C(2A)-C(3A)-C(17A) | 112.15(14) |
| C(2A)-C(3A)-C(4A)  | 110.90(12) |
| C(17A)-C(3A)-C(4A) | 115.13(13) |
| C(2A)-C(3A)-H(3A)  | 105.3(9)   |
| C(17A)-C(3A)-H(3A) | 107.8(9)   |
| C(4A)-C(3A)-H(3A)  | 104.8(9)   |
| C(5)-C(4)-C(3)     | 107.28(12) |
| C(5)-C(4)-C(11)    | 112.93(12) |
| C(3)-C(4)-C(11)    | 113.55(12) |
| C(5)-C(4)-H(4)     | 110.4(9)   |
| C(3)-C(4)-H(4)     | 106.6(8)   |

|                    |            |
|--------------------|------------|
| C(11)-C(4)-H(4)    | 105.9(9)   |
| C(5A)-C(4A)-C(11A) | 112.98(12) |
| C(5A)-C(4A)-C(3A)  | 107.53(12) |
| C(11A)-C(4A)-C(3A) | 114.12(12) |
| C(5A)-C(4A)-H(4A)  | 108.0(9)   |
| C(11A)-C(4A)-H(4A) | 106.7(8)   |
| C(3A)-C(4A)-H(4A)  | 107.3(8)   |
| C(10)-C(5)-C(6)    | 117.54(15) |
| C(10)-C(5)-C(4)    | 118.88(13) |
| C(6)-C(5)-C(4)     | 123.57(14) |
| C(10A)-C(5A)-C(6A) | 117.30(15) |
| C(10A)-C(5A)-C(4A) | 119.06(13) |
| C(6A)-C(5A)-C(4A)  | 123.64(14) |
| C(7)-C(6)-C(5)     | 120.91(16) |
| C(7)-C(6)-H(6)     | 119.9(10)  |
| C(5)-C(6)-H(6)     | 119.2(10)  |
| C(7A)-C(6A)-C(5A)  | 120.81(16) |
| C(7A)-C(6A)-H(6A)  | 121.0(10)  |
| C(5A)-C(6A)-H(6A)  | 118.1(10)  |
| C(8)-C(7)-C(6)     | 120.06(16) |
| C(8)-C(7)-H(7)     | 119.5(10)  |
| C(6)-C(7)-H(7)     | 120.5(10)  |
| C(8A)-C(7A)-C(6A)  | 120.25(16) |
| C(8A)-C(7A)-H(7A)  | 121.7(11)  |
| C(6A)-C(7A)-H(7A)  | 118.0(11)  |
| C(9)-C(8)-C(7)     | 120.13(16) |
| C(9)-C(8)-H(8)     | 119.6(10)  |
| C(7)-C(8)-H(8)     | 120.2(10)  |
| C(7A)-C(8A)-C(9A)  | 120.13(16) |
| C(7A)-C(8A)-H(8A)  | 118.6(10)  |
| C(9A)-C(8A)-H(8A)  | 121.2(10)  |
| C(10)-C(9)-C(8)    | 118.75(16) |
| C(10)-C(9)-H(9)    | 118.3(10)  |
| C(8)-C(9)-H(9)     | 122.9(10)  |
| C(10A)-C(9A)-C(8A) | 118.62(16) |
| C(10A)-C(9A)-H(9A) | 118.9(10)  |



|                      |            |
|----------------------|------------|
| C(8A)-C(9A)-H(9A)    | 122.5(10)  |
| C(9)-C(10)-C(5)      | 122.61(15) |
| C(9)-C(10)-O(1)      | 116.10(14) |
| C(5)-C(10)-O(1)      | 121.22(14) |
| C(9A)-C(10A)-C(5A)   | 122.89(15) |
| C(9A)-C(10A)-O(1A)   | 115.99(14) |
| C(5A)-C(10A)-O(1A)   | 121.08(14) |
| O(3)-C(11)-C(12)     | 104.46(12) |
| O(3)-C(11)-C(4)      | 107.07(12) |
| C(12)-C(11)-C(4)     | 118.57(13) |
| O(3)-C(11)-H(11)     | 107.4(8)   |
| C(12)-C(11)-H(11)    | 108.5(9)   |
| C(4)-C(11)-H(11)     | 110.2(8)   |
| O(3A)-C(11A)-C(12A)  | 104.71(12) |
| O(3A)-C(11A)-C(4A)   | 106.65(12) |
| C(12A)-C(11A)-C(4A)  | 118.44(13) |
| O(3A)-C(11A)-H(11A)  | 107.7(8)   |
| C(12A)-C(11A)-H(11A) | 108.8(9)   |
| C(4A)-C(11A)-H(11A)  | 109.9(8)   |
| C(11)-C(12)-C(13)    | 101.56(12) |
| C(11)-C(12)-H(12A)   | 111.5(9)   |
| C(13)-C(12)-H(12A)   | 109.5(9)   |
| C(11)-C(12)-H(12B)   | 113.3(10)  |
| C(13)-C(12)-H(12B)   | 112.5(10)  |
| H(12A)-C(12)-H(12B)  | 108.3(14)  |
| C(11A)-C(12A)-C(13A) | 101.62(13) |
| C(11A)-C(12A)-H(12C) | 109.5(9)   |
| C(13A)-C(12A)-H(12C) | 110.4(9)   |
| C(11A)-C(12A)-H(12D) | 112.6(10)  |
| C(13A)-C(12A)-H(12D) | 113.7(9)   |
| H(12C)-C(12A)-H(12D) | 108.8(14)  |
| C(12)-C(13)-C(14)    | 104.45(12) |
| C(12)-C(13)-H(13A)   | 113.1(10)  |
| C(14)-C(13)-H(13A)   | 113.1(10)  |
| C(12)-C(13)-H(13B)   | 110.2(9)   |
| C(14)-C(13)-H(13B)   | 109.3(9)   |

|                      |            |
|----------------------|------------|
| H(13A)-C(13)-H(13B)  | 106.7(13)  |
| C(12A)-C(13A)-C(14A) | 104.45(12) |
| C(12A)-C(13A)-H(13C) | 111.8(11)  |
| C(14A)-C(13A)-H(13C) | 113.5(10)  |
| C(12A)-C(13A)-H(13D) | 109.4(10)  |
| C(14A)-C(13A)-H(13D) | 110.4(10)  |
| H(13C)-C(13A)-H(13D) | 107.3(14)  |
| O(3)-C(14)-C(15)     | 106.18(13) |
| O(3)-C(14)-C(16)     | 108.84(13) |
| C(15)-C(14)-C(16)    | 110.93(14) |
| O(3)-C(14)-C(13)     | 105.17(11) |
| C(15)-C(14)-C(13)    | 113.16(14) |
| C(16)-C(14)-C(13)    | 112.13(13) |
| O(3A)-C(14A)-C(15A)  | 106.42(13) |
| O(3A)-C(14A)-C(16A)  | 108.46(13) |
| C(15A)-C(14A)-C(16A) | 110.55(14) |
| O(3A)-C(14A)-C(13A)  | 105.43(11) |
| C(15A)-C(14A)-C(13A) | 113.25(15) |
| C(16A)-C(14A)-C(13A) | 112.33(14) |
| C(14)-C(15)-H(15A)   | 110.4(11)  |
| C(14)-C(15)-H(15B)   | 110.4(11)  |
| H(15A)-C(15)-H(15B)  | 106.8(15)  |
| C(14)-C(15)-H(15C)   | 108.6(11)  |
| H(15A)-C(15)-H(15C)  | 110.7(16)  |
| H(15B)-C(15)-H(15C)  | 109.9(15)  |
| C(14A)-C(15A)-H(15D) | 111.9(11)  |
| C(14A)-C(15A)-H(15E) | 108.7(12)  |
| H(15D)-C(15A)-H(15E) | 108.1(15)  |
| C(14A)-C(15A)-H(15F) | 111.5(11)  |
| H(15D)-C(15A)-H(15F) | 108.6(16)  |
| H(15E)-C(15A)-H(15F) | 107.9(15)  |
| C(14)-C(16)-H(16A)   | 110.0(12)  |
| C(14)-C(16)-H(16B)   | 110.5(11)  |
| H(16A)-C(16)-H(16B)  | 107.0(16)  |
| C(14)-C(16)-H(16C)   | 109.1(10)  |
| H(16A)-C(16)-H(16C)  | 110.5(15)  |

|                      |            |
|----------------------|------------|
| H(16B)-C(16)-H(16C)  | 109.7(15)  |
| C(14A)-C(16A)-H(16D) | 110.5(11)  |
| C(14A)-C(16A)-H(16E) | 109.7(10)  |
| H(16D)-C(16A)-H(16E) | 110.6(15)  |
| C(14A)-C(16A)-H(16F) | 111.0(12)  |
| H(16D)-C(16A)-H(16F) | 108.2(16)  |
| H(16E)-C(16A)-H(16F) | 106.9(15)  |
| C(3)-C(17)-H(17A)    | 108.7(10)  |
| C(3)-C(17)-H(17B)    | 111.9(10)  |
| H(17A)-C(17)-H(17B)  | 106.7(14)  |
| C(3)-C(17)-H(17C)    | 110.0(11)  |
| H(17A)-C(17)-H(17C)  | 110.5(14)  |
| H(17B)-C(17)-H(17C)  | 109.1(14)  |
| C(3A)-C(17A)-H(17D)  | 110.7(11)  |
| C(3A)-C(17A)-H(17E)  | 110.7(10)  |
| H(17D)-C(17A)-H(17E) | 108.5(14)  |
| C(3A)-C(17A)-H(17F)  | 109.4(10)  |
| H(17D)-C(17A)-H(17F) | 107.4(14)  |
| H(17E)-C(17A)-H(17F) | 110.1(14)  |
| C(2)-O(1)-C(10)      | 120.22(12) |
| C(2A)-O(1A)-C(10A)   | 120.36(12) |
| C(11)-O(3)-C(14)     | 110.01(11) |
| C(11A)-O(3A)-C(14A)  | 110.10(11) |

---

Symmetry transformations used to generate equivalent atoms:

Table 4. Anisotropic displacement parameters ( $\text{\AA}^2 \times 10^3$ ) for mss034. The anisotropic displacement factor exponent takes the form:  $-2\pi^2 [ h^2 a^{*2} U^{11} + \dots + 2 h k a^* b^* U^{12} ]$

|        | U <sup>11</sup> | U <sup>22</sup> | U <sup>33</sup> | U <sup>23</sup> | U <sup>13</sup> | U <sup>12</sup> |
|--------|-----------------|-----------------|-----------------|-----------------|-----------------|-----------------|
| C(2)   | 25(1)           | 36(1)           | 18(1)           | 3(1)            | 1(1)            | -3(1)           |
| C(2A)  | 27(1)           | 29(1)           | 23(1)           | 3(1)            | 1(1)            | -3(1)           |
| C(3)   | 24(1)           | 30(1)           | 20(1)           | 3(1)            | 1(1)            | -2(1)           |
| C(3A)  | 26(1)           | 22(1)           | 23(1)           | 2(1)            | -1(1)           | -2(1)           |
| C(4)   | 20(1)           | 24(1)           | 21(1)           | 2(1)            | 1(1)            | -1(1)           |
| C(4A)  | 21(1)           | 21(1)           | 23(1)           | 2(1)            | 0(1)            | 0(1)            |
| C(5)   | 24(1)           | 26(1)           | 18(1)           | 1(1)            | -2(1)           | -2(1)           |
| C(5A)  | 23(1)           | 23(1)           | 20(1)           | 1(1)            | -2(1)           | -1(1)           |
| C(6)   | 27(1)           | 34(1)           | 23(1)           | 3(1)            | 0(1)            | -4(1)           |
| C(6A)  | 25(1)           | 29(1)           | 28(1)           | 1(1)            | -2(1)           | -2(1)           |
| C(7)   | 32(1)           | 34(1)           | 27(1)           | 2(1)            | -3(1)           | -12(1)          |
| C(7A)  | 29(1)           | 34(1)           | 35(1)           | 2(1)            | -4(1)           | -10(1)          |
| C(8)   | 41(1)           | 26(1)           | 25(1)           | 1(1)            | -7(1)           | -6(1)           |
| C(8A)  | 42(1)           | 26(1)           | 34(1)           | -1(1)           | -5(1)           | -9(1)           |
| C(9)   | 36(1)           | 28(1)           | 22(1)           | -2(1)           | -5(1)           | 3(1)            |
| C(9A)  | 40(1)           | 25(1)           | 25(1)           | -2(1)           | 0(1)            | 2(1)            |
| C(10)  | 23(1)           | 29(1)           | 20(1)           | 3(1)            | -3(1)           | -2(1)           |
| C(10A) | 24(1)           | 27(1)           | 21(1)           | 3(1)            | -1(1)           | -2(1)           |
| C(11)  | 21(1)           | 25(1)           | 21(1)           | 0(1)            | 2(1)            | -2(1)           |
| C(11A) | 23(1)           | 22(1)           | 24(1)           | -1(1)           | 1(1)            | -3(1)           |
| C(12)  | 22(1)           | 32(1)           | 24(1)           | 0(1)            | -1(1)           | 1(1)            |
| C(12A) | 23(1)           | 31(1)           | 26(1)           | -1(1)           | -3(1)           | 0(1)            |
| C(13)  | 27(1)           | 33(1)           | 24(1)           | 1(1)            | -4(1)           | -1(1)           |
| C(13A) | 31(1)           | 31(1)           | 25(1)           | 1(1)            | -5(1)           | 0(1)            |
| C(14)  | 28(1)           | 26(1)           | 18(1)           | 1(1)            | -1(1)           | -2(1)           |
| C(14A) | 28(1)           | 29(1)           | 20(1)           | 0(1)            | -3(1)           | -1(1)           |
| C(15)  | 35(1)           | 36(1)           | 34(1)           | 6(1)            | 1(1)            | -6(1)           |
| C(15A) | 35(1)           | 38(1)           | 37(1)           | 5(1)            | -1(1)           | -8(1)           |
| C(16)  | 38(1)           | 38(1)           | 34(1)           | -9(1)           | -3(1)           | 5(1)            |
| C(16A) | 44(1)           | 39(1)           | 32(1)           | -9(1)           | -3(1)           | 2(1)            |
| C(17)  | 34(1)           | 31(1)           | 30(1)           | 4(1)            | 2(1)            | -7(1)           |

|        |       |       |       |       |      |       |
|--------|-------|-------|-------|-------|------|-------|
| C(17A) | 36(1) | 25(1) | 34(1) | 2(1)  | 3(1) | -7(1) |
| O(1)   | 23(1) | 31(1) | 30(1) | -1(1) | 2(1) | 2(1)  |
| O(1A)  | 26(1) | 25(1) | 31(1) | 1(1)  | 4(1) | 0(1)  |
| O(2)   | 23(1) | 48(1) | 32(1) | 6(1)  | 2(1) | -4(1) |
| O(2A)  | 25(1) | 40(1) | 49(1) | 9(1)  | 4(1) | -3(1) |
| O(3)   | 24(1) | 41(1) | 20(1) | 4(1)  | 2(1) | 5(1)  |
| O(3A)  | 26(1) | 40(1) | 21(1) | 3(1)  | 2(1) | 7(1)  |

---

Table 5. Hydrogen coordinates ( $\times 10^4$ ) and isotropic displacement parameters ( $\text{\AA}^2 \times 10^3$ ) for mss034.

|        | x        | y         | z        | U(eq) |
|--------|----------|-----------|----------|-------|
| H(3)   | 935(7)   | 577(14)   | 2169(6)  | 21(4) |
| H(3A)  | 3418(7)  | -1921(15) | 2242(7)  | 28(4) |
| H(4)   | 1549(7)  | 401(15)   | 1371(6)  | 25(4) |
| H(4A)  | 4002(7)  | -2103(14) | 1437(6)  | 18(4) |
| H(6)   | 2247(8)  | 2239(16)  | 1218(7)  | 36(5) |
| H(6A)  | 4732(8)  | -385(16)  | 1246(7)  | 32(4) |
| H(7)   | 2456(8)  | 4297(15)  | 1482(6)  | 29(4) |
| H(7A)  | 5001(8)  | 1641(17)  | 1508(7)  | 39(5) |
| H(8)   | 1659(8)  | 5529(17)  | 1873(7)  | 39(5) |
| H(8A)  | 4267(8)  | 2955(18)  | 1954(7)  | 45(5) |
| H(9)   | 650(8)   | 4636(16)  | 2055(7)  | 33(5) |
| H(9A)  | 3242(8)  | 2138(16)  | 2156(7)  | 33(5) |
| H(11)  | 717(7)   | -80(15)   | 674(6)   | 25(4) |
| H(11A) | 3155(7)  | -2553(15) | 751(6)   | 24(4) |
| H(12A) | 591(8)   | 2597(16)  | 613(7)   | 33(4) |
| H(12B) | 35(8)    | 1590(16)  | 603(7)   | 33(5) |
| H(12C) | 3085(8)  | 88(16)    | 695(7)   | 31(4) |
| H(12D) | 2500(8)  | -851(16)  | 681(7)   | 34(5) |
| H(13A) | 441(8)   | 2328(17)  | -370(7)  | 36(5) |
| H(13B) | 277(7)   | 909(15)   | -302(7)  | 30(4) |
| H(13C) | 2932(8)  | -109(18)  | -286(8)  | 44(5) |
| H(13D) | 2735(8)  | -1515(16) | -233(7)  | 39(5) |
| H(15A) | 1620(8)  | 2947(18)  | -97(8)   | 46(5) |
| H(15B) | 2105(9)  | 2008(17)  | -367(7)  | 44(5) |
| H(15C) | 1540(8)  | 2536(18)  | -764(8)  | 49(5) |
| H(15D) | 4132(8)  | 432(19)   | -7(8)    | 51(6) |
| H(15E) | 4584(10) | -579(18)  | -291(8)  | 50(6) |
| H(15F) | 4053(9)  | 77(19)    | -683(9)  | 59(6) |
| H(16A) | 1157(9)  | 369(19)   | -1012(9) | 60(6) |
| H(16B) | 1073(9)  | -570(20)  | -484(8)  | 55(6) |

|        |         |           |         |       |
|--------|---------|-----------|---------|-------|
| H(16C) | 1785(9) | -85(17)   | -629(8) | 44(5) |
| H(16D) | 3512(9) | -3051(19) | -431(8) | 54(6) |
| H(16E) | 4245(9) | -2600(17) | -574(7) | 45(5) |
| H(16F) | 3643(9) | -2102(18) | -944(9) | 55(6) |
| H(17A) | 283(8)  | -1094(16) | 2094(8) | 46(5) |
| H(17B) | 235(8)  | -984(15)  | 1420(7) | 31(5) |
| H(17C) | 904(9)  | -1389(17) | 1696(8) | 48(5) |
| H(17D) | 2740(8) | -3570(17) | 2177(8) | 44(5) |
| H(17E) | 2641(8) | -3397(16) | 1493(7) | 35(5) |
| H(17F) | 3330(9) | -3876(17) | 1765(8) | 45(5) |

---

Table 6. Torsion angles [ $^{\circ}$ ] for mss034.

---

|                           |             |
|---------------------------|-------------|
| O(2)-C(2)-C(3)-C(17)      | 7.9(2)      |
| O(1)-C(2)-C(3)-C(17)      | -173.22(12) |
| O(2)-C(2)-C(3)-C(4)       | 137.43(15)  |
| O(1)-C(2)-C(3)-C(4)       | -43.67(17)  |
| O(2A)-C(2A)-C(3A)-C(17A)  | 8.1(2)      |
| O(1A)-C(2A)-C(3A)-C(17A)  | -173.45(13) |
| O(2A)-C(2A)-C(3A)-C(4A)   | 138.41(16)  |
| O(1A)-C(2A)-C(3A)-C(4A)   | -43.19(17)  |
| C(2)-C(3)-C(4)-C(5)       | 55.48(16)   |
| C(17)-C(3)-C(4)-C(5)      | -176.89(13) |
| C(2)-C(3)-C(4)-C(11)      | -70.01(17)  |
| C(17)-C(3)-C(4)-C(11)     | 57.62(18)   |
| C(2A)-C(3A)-C(4A)-C(5A)   | 54.41(16)   |
| C(17A)-C(3A)-C(4A)-C(5A)  | -176.91(13) |
| C(2A)-C(3A)-C(4A)-C(11A)  | -71.74(16)  |
| C(17A)-C(3A)-C(4A)-C(11A) | 56.93(18)   |
| C(3)-C(4)-C(5)-C(10)      | -33.88(17)  |
| C(11)-C(4)-C(5)-C(10)     | 91.99(15)   |
| C(3)-C(4)-C(5)-C(6)       | 144.80(14)  |
| C(11)-C(4)-C(5)-C(6)      | -89.33(17)  |
| C(11A)-C(4A)-C(5A)-C(10A) | 94.51(16)   |
| C(3A)-C(4A)-C(5A)-C(10A)  | -32.32(18)  |
| C(11A)-C(4A)-C(5A)-C(6A)  | -86.46(18)  |
| C(3A)-C(4A)-C(5A)-C(6A)   | 146.71(14)  |
| C(10)-C(5)-C(6)-C(7)      | -0.9(2)     |
| C(4)-C(5)-C(6)-C(7)       | -179.61(14) |
| C(10A)-C(5A)-C(6A)-C(7A)  | 0.9(2)      |
| C(4A)-C(5A)-C(6A)-C(7A)   | -178.16(14) |
| C(5)-C(6)-C(7)-C(8)       | 0.1(2)      |
| C(5A)-C(6A)-C(7A)-C(8A)   | -0.2(2)     |
| C(6)-C(7)-C(8)-C(9)       | 0.6(2)      |
| C(6A)-C(7A)-C(8A)-C(9A)   | -0.3(3)     |
| C(7)-C(8)-C(9)-C(10)      | -0.5(2)     |
| C(7A)-C(8A)-C(9A)-C(10A)  | 0.2(2)      |



|                             |             |
|-----------------------------|-------------|
| C(8)-C(9)-C(10)-C(5)        | -0.3(2)     |
| C(8)-C(9)-C(10)-O(1)        | -177.39(13) |
| C(6)-C(5)-C(10)-C(9)        | 1.0(2)      |
| C(4)-C(5)-C(10)-C(9)        | 179.78(13)  |
| C(6)-C(5)-C(10)-O(1)        | 177.94(12)  |
| C(4)-C(5)-C(10)-O(1)        | -3.3(2)     |
| C(8A)-C(9A)-C(10A)-C(5A)    | 0.6(2)      |
| C(8A)-C(9A)-C(10A)-O(1A)    | -177.14(13) |
| C(6A)-C(5A)-C(10A)-C(9A)    | -1.1(2)     |
| C(4A)-C(5A)-C(10A)-C(9A)    | 178.03(14)  |
| C(6A)-C(5A)-C(10A)-O(1A)    | 176.51(13)  |
| C(4A)-C(5A)-C(10A)-O(1A)    | -4.4(2)     |
| C(5)-C(4)-C(11)-O(3)        | 76.40(15)   |
| C(3)-C(4)-C(11)-O(3)        | -161.17(13) |
| C(5)-C(4)-C(11)-C(12)       | -41.29(18)  |
| C(3)-C(4)-C(11)-C(12)       | 81.14(17)   |
| C(5A)-C(4A)-C(11A)-O(3A)    | 75.94(15)   |
| C(3A)-C(4A)-C(11A)-O(3A)    | -160.81(12) |
| C(5A)-C(4A)-C(11A)-C(12A)   | -41.67(18)  |
| C(3A)-C(4A)-C(11A)-C(12A)   | 81.57(17)   |
| O(3)-C(11)-C(12)-C(13)      | 37.86(15)   |
| C(4)-C(11)-C(12)-C(13)      | 156.92(13)  |
| O(3A)-C(11A)-C(12A)-C(13A)  | 36.86(15)   |
| C(4A)-C(11A)-C(12A)-C(13A)  | 155.49(13)  |
| C(11)-C(12)-C(13)-C(14)     | -32.05(16)  |
| C(11A)-C(12A)-C(13A)-C(14A) | -31.97(16)  |
| C(12)-C(13)-C(14)-O(3)      | 15.36(16)   |
| C(12)-C(13)-C(14)-C(15)     | -100.11(15) |
| C(12)-C(13)-C(14)-C(16)     | 133.48(14)  |
| C(12A)-C(13A)-C(14A)-O(3A)  | 16.18(17)   |
| C(12A)-C(13A)-C(14A)-C(15A) | -99.77(16)  |
| C(12A)-C(13A)-C(14A)-C(16A) | 134.12(15)  |
| O(2)-C(2)-O(1)-C(10)        | -175.66(12) |
| C(3)-C(2)-O(1)-C(10)        | 5.34(18)    |
| C(9)-C(10)-O(1)-C(2)        | -162.93(13) |
| C(5)-C(10)-O(1)-C(2)        | 19.96(19)   |

|                            |             |
|----------------------------|-------------|
| O(2A)-C(2A)-O(1A)-C(10A)   | -176.20(13) |
| C(3A)-C(2A)-O(1A)-C(10A)   | 5.24(19)    |
| C(9A)-C(10A)-O(1A)-C(2A)   | -161.87(13) |
| C(5A)-C(10A)-O(1A)-C(2A)   | 20.4(2)     |
| C(12)-C(11)-O(3)-C(14)     | -29.86(16)  |
| C(4)-C(11)-O(3)-C(14)      | -156.43(12) |
| C(15)-C(14)-O(3)-C(11)     | 129.14(14)  |
| C(16)-C(14)-O(3)-C(11)     | -111.39(14) |
| C(13)-C(14)-O(3)-C(11)     | 8.94(16)    |
| C(12A)-C(11A)-O(3A)-C(14A) | -28.29(16)  |
| C(4A)-C(11A)-O(3A)-C(14A)  | -154.63(12) |
| C(15A)-C(14A)-O(3A)-C(11A) | 127.96(14)  |
| C(16A)-C(14A)-O(3A)-C(11A) | -113.09(15) |
| C(13A)-C(14A)-O(3A)-C(11A) | 7.42(16)    |

---

Symmetry transformations used to generate equivalent atoms:

## **References:**

- 1) Braddock, D. C.; Cansell, G.; Hermitage, S. A. *Chem. Commun.* **2006**, 2483.
- 2) Bianco, A.; Cavarischia, C.; Guiso M. *Nat. Prod. Res.*, **2006**, *20*, 93-97
- 3) Sharma, S.; Oehlschlager, C. A. *J.Org.Chem.* **1989**, *54*, 5064-5073.
- 4) Hahn, F. E.; von Fehren, T.; Wittenbecher, L.; Frohlich, R. *Z. Naturforsch. B* **2004**, *59*, 541-543
- 5) Harada, T.; Muramatsu, K.; Mizunashi, K.; Kitano, C.; Imaoka, D.; Fujiwara, T.; Kataoka, H. *J. Org. Chem.* **2008**, *73*, 249-258
- 6) Zhang, Y.; Sigman, M. S. *J. Am. Chem. Soc.* **2007**, *129*, 3076.
- 7) Arduini, A.; Bosi, A.; Pochini, A.; Ungaro, R. *Tetrahedron*, **1985**, *41*, 3095.
- 8) For a leading reference see: Yu, M.; Danishefsky, S. J.; *J. Am. Chem. Soc.* **2008**, *130*, 2783. For a review see: Magdziak, D.; Meek, S. J.; Pettus, T. R. R. *Chem. Rev.* **2004**, *104*, 1383.
- 9) Hoye, R. T.; Jefferey, H. C.; Shao, F. *Nature Protocols* **2007**, *2*, 2451-2458
- 10) Crimmins, M. T.; Jung, D. K.; Gray, J. L. *J. Am. Chem. Soc.* **1993**, *115*, 3146.

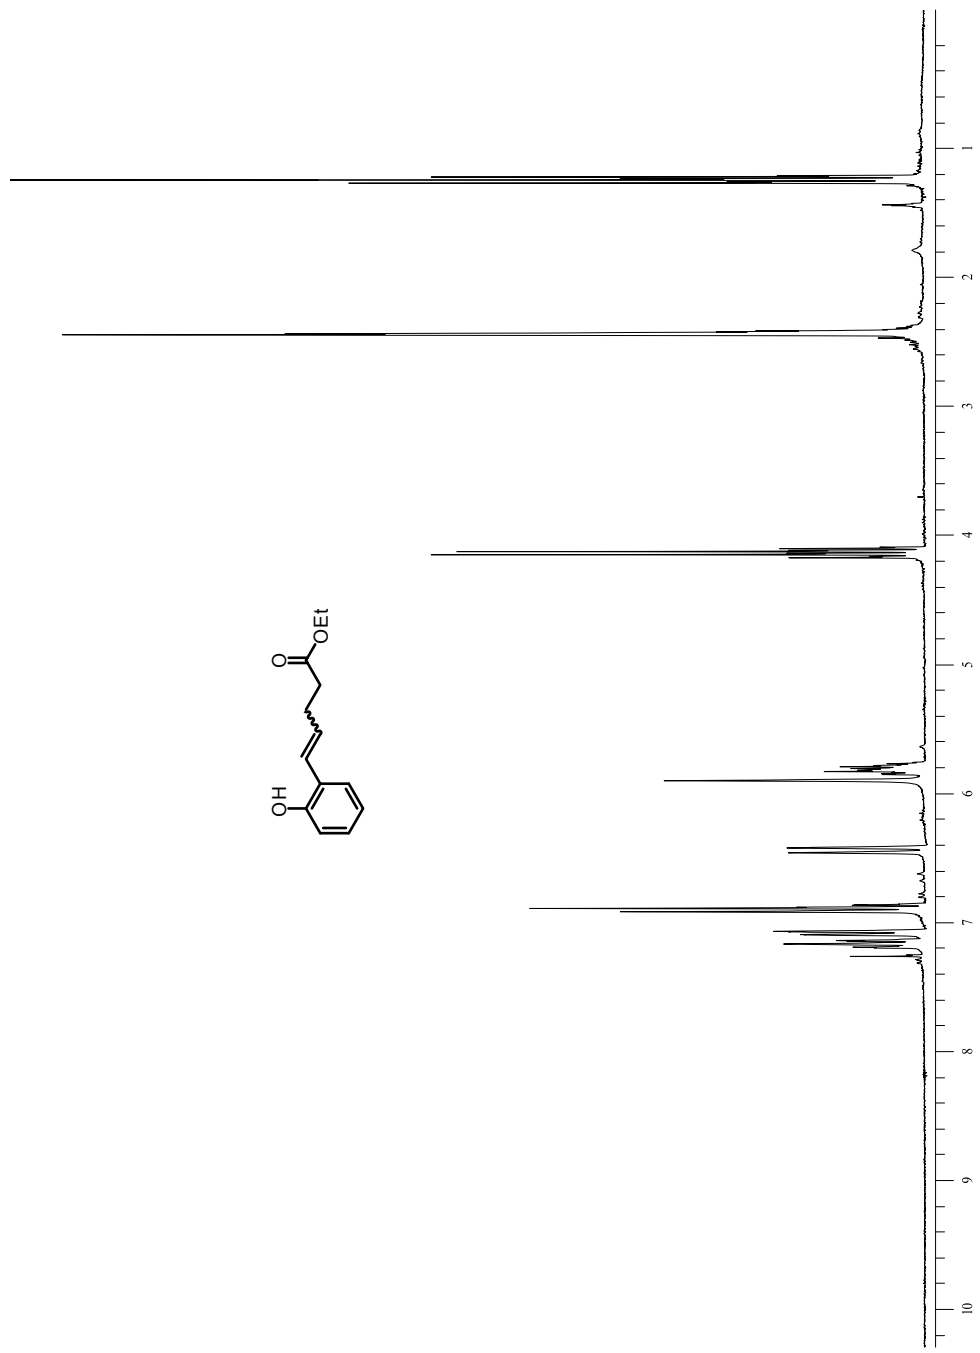

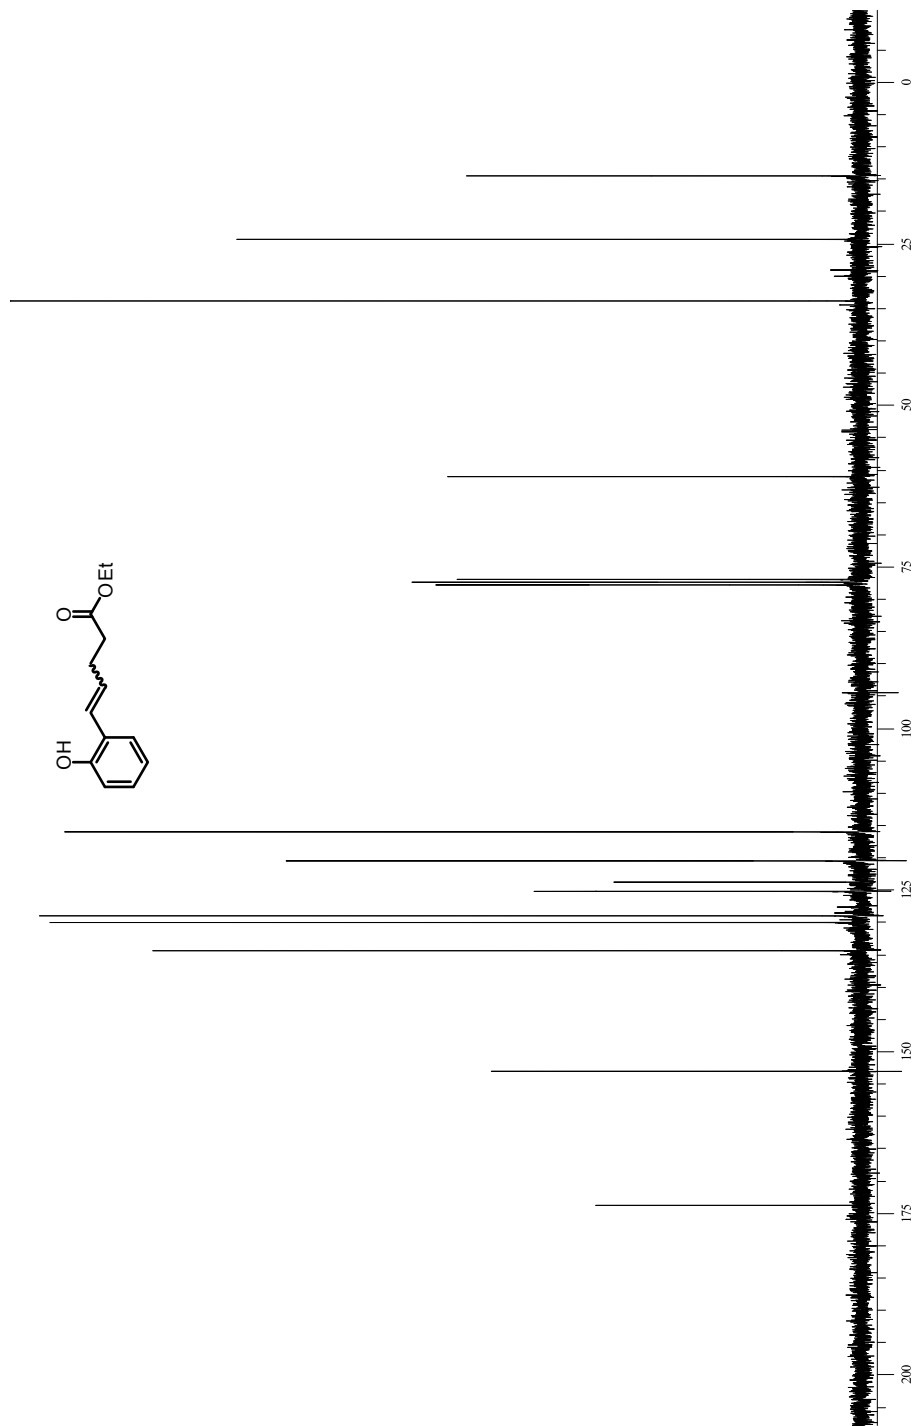

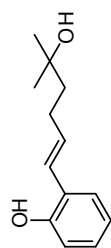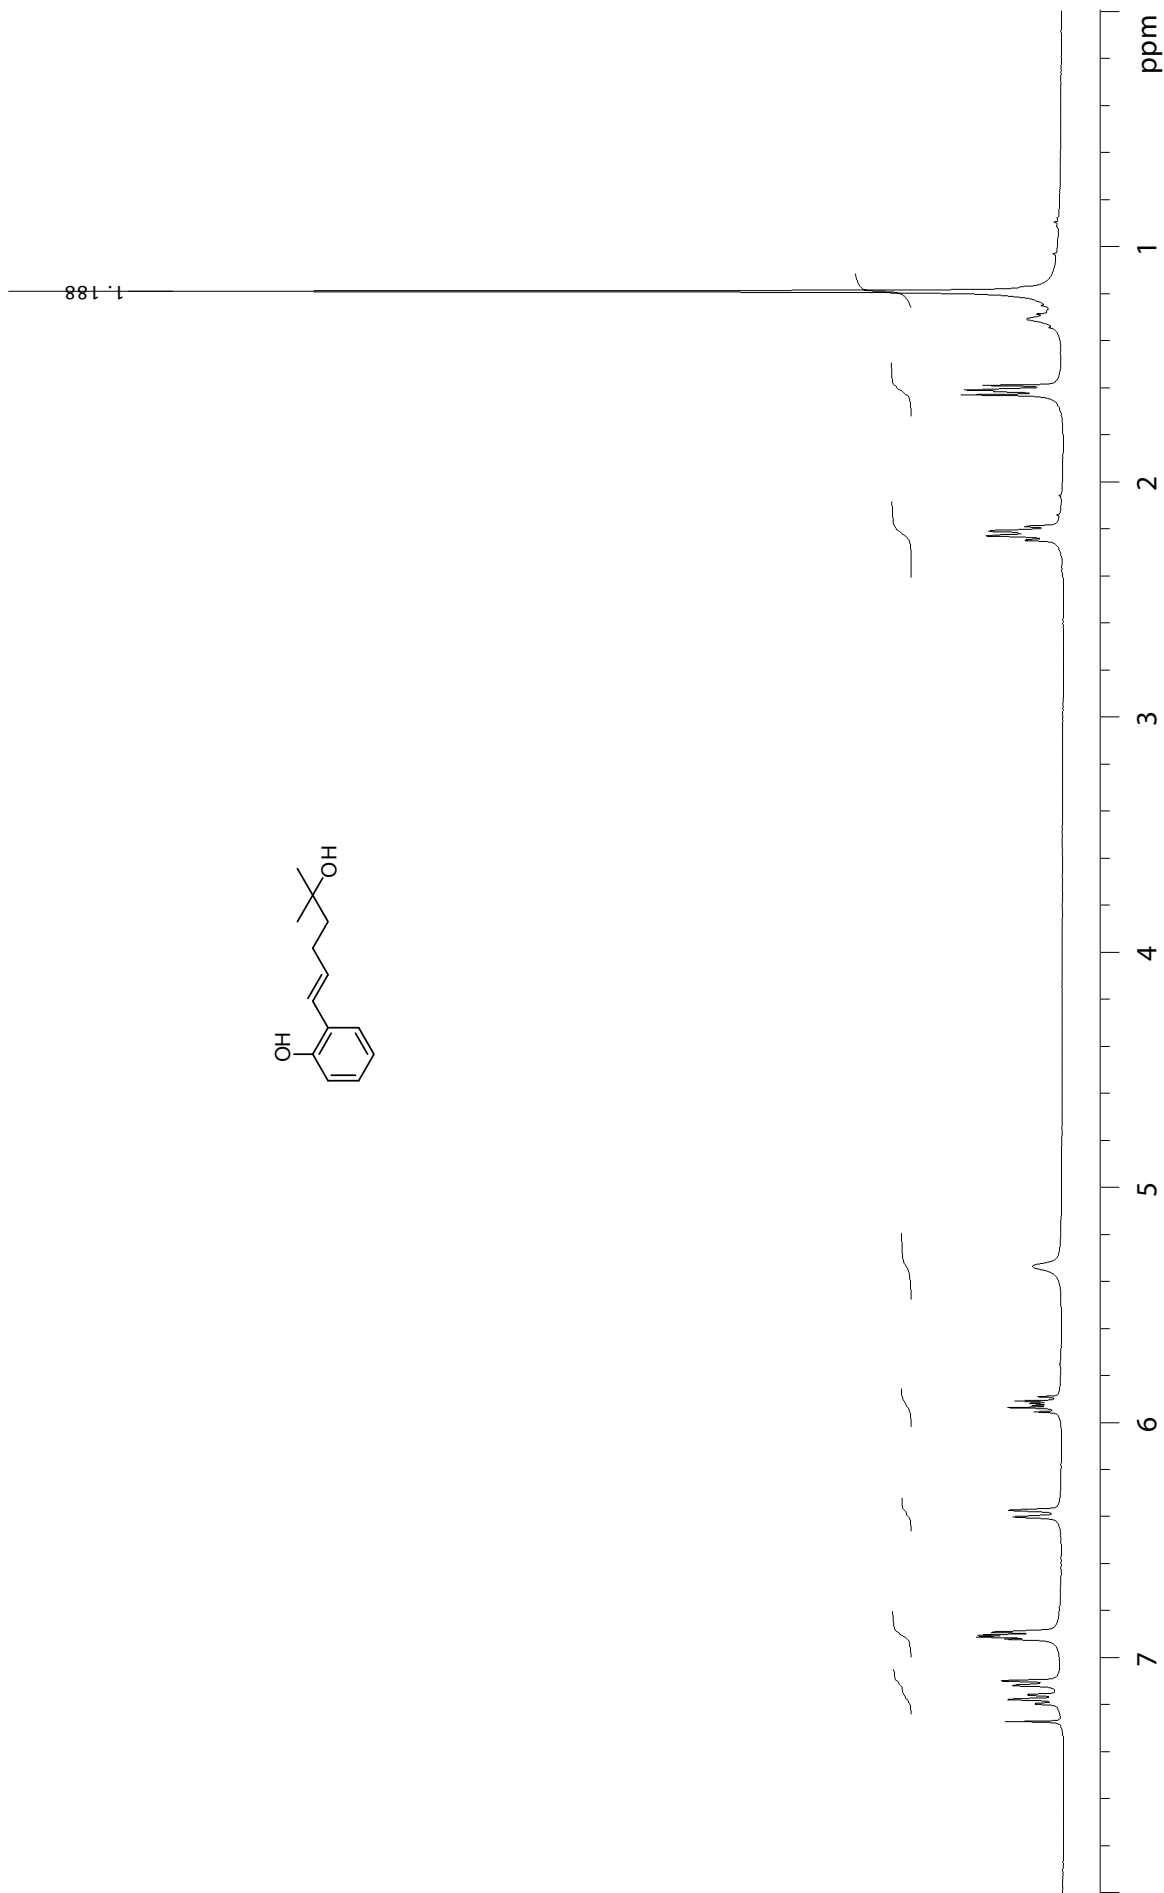

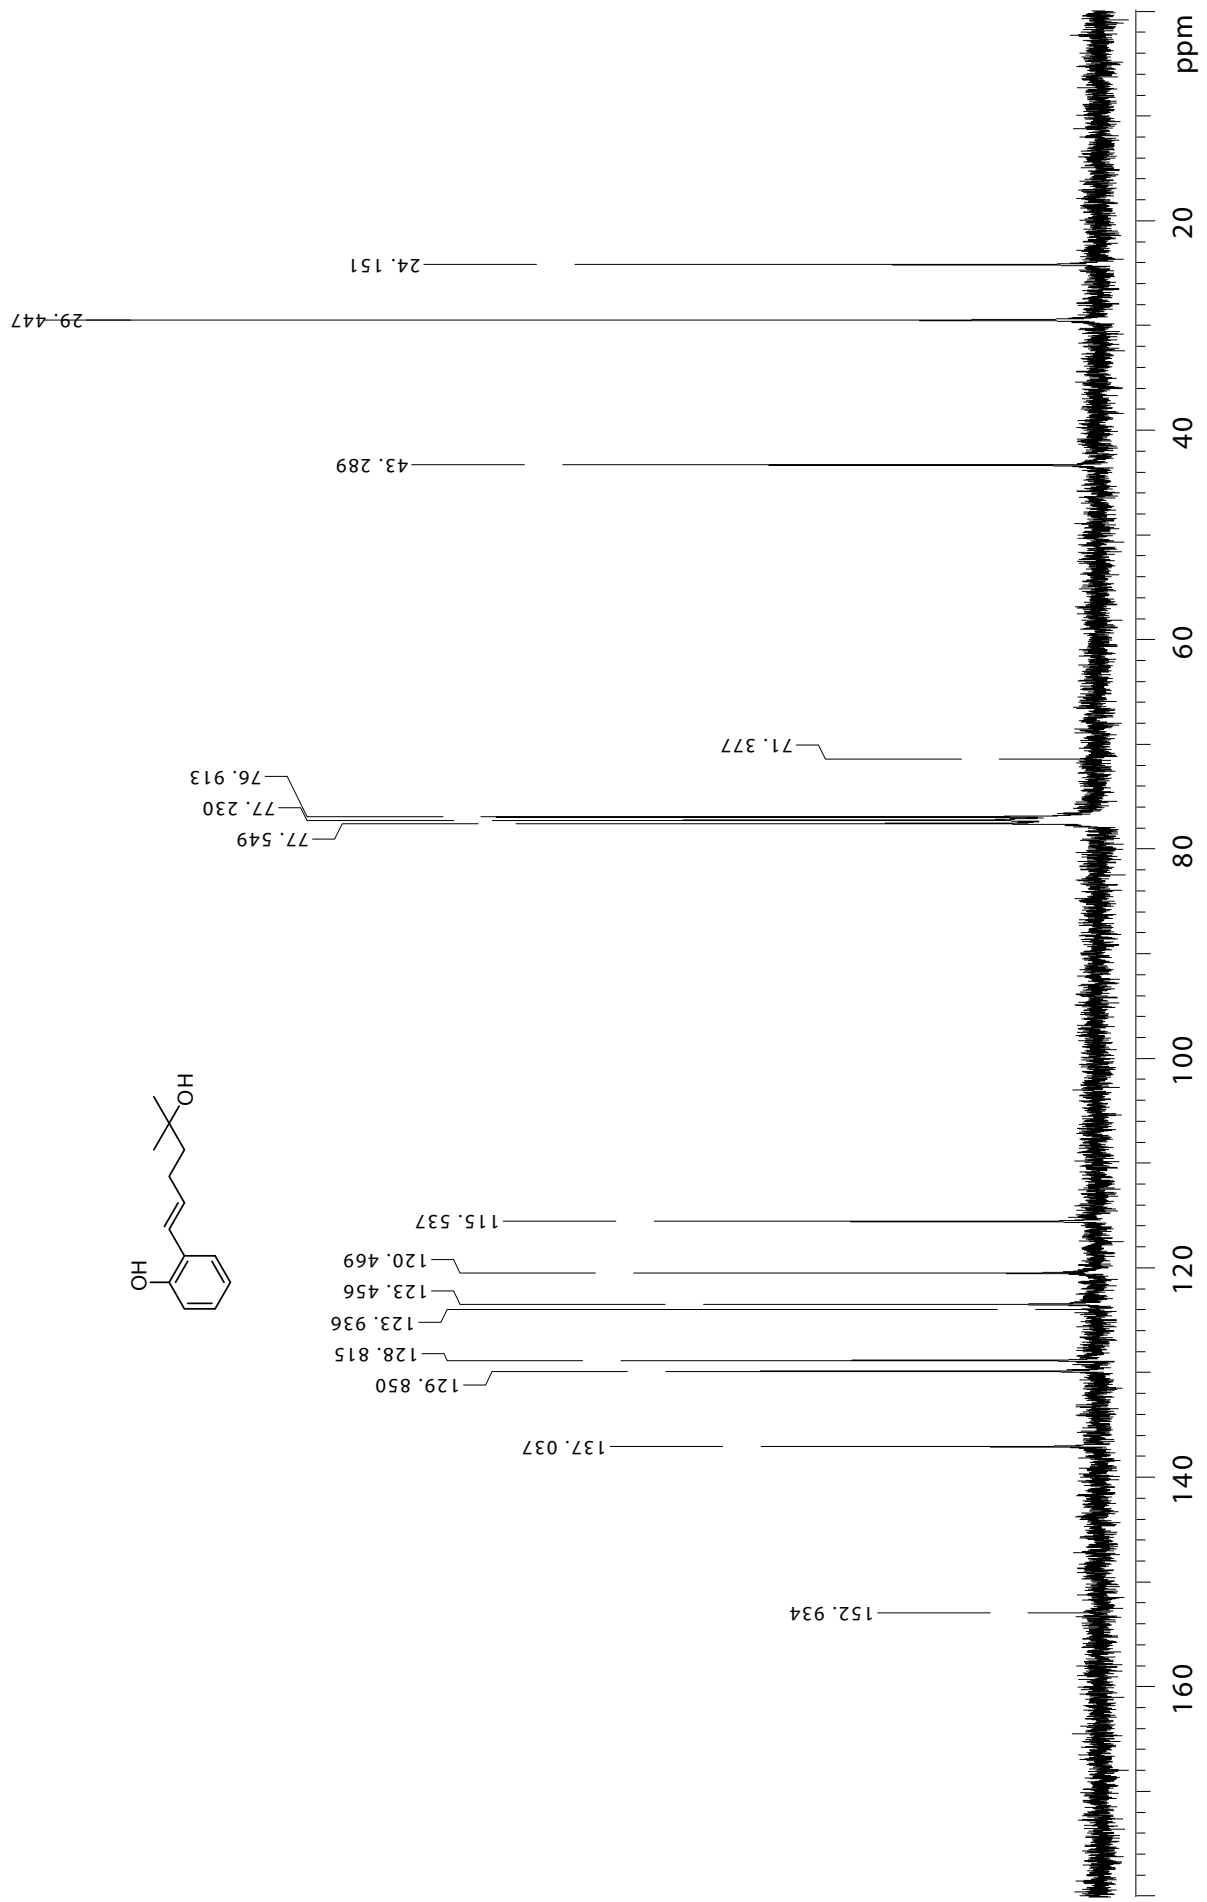

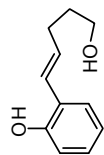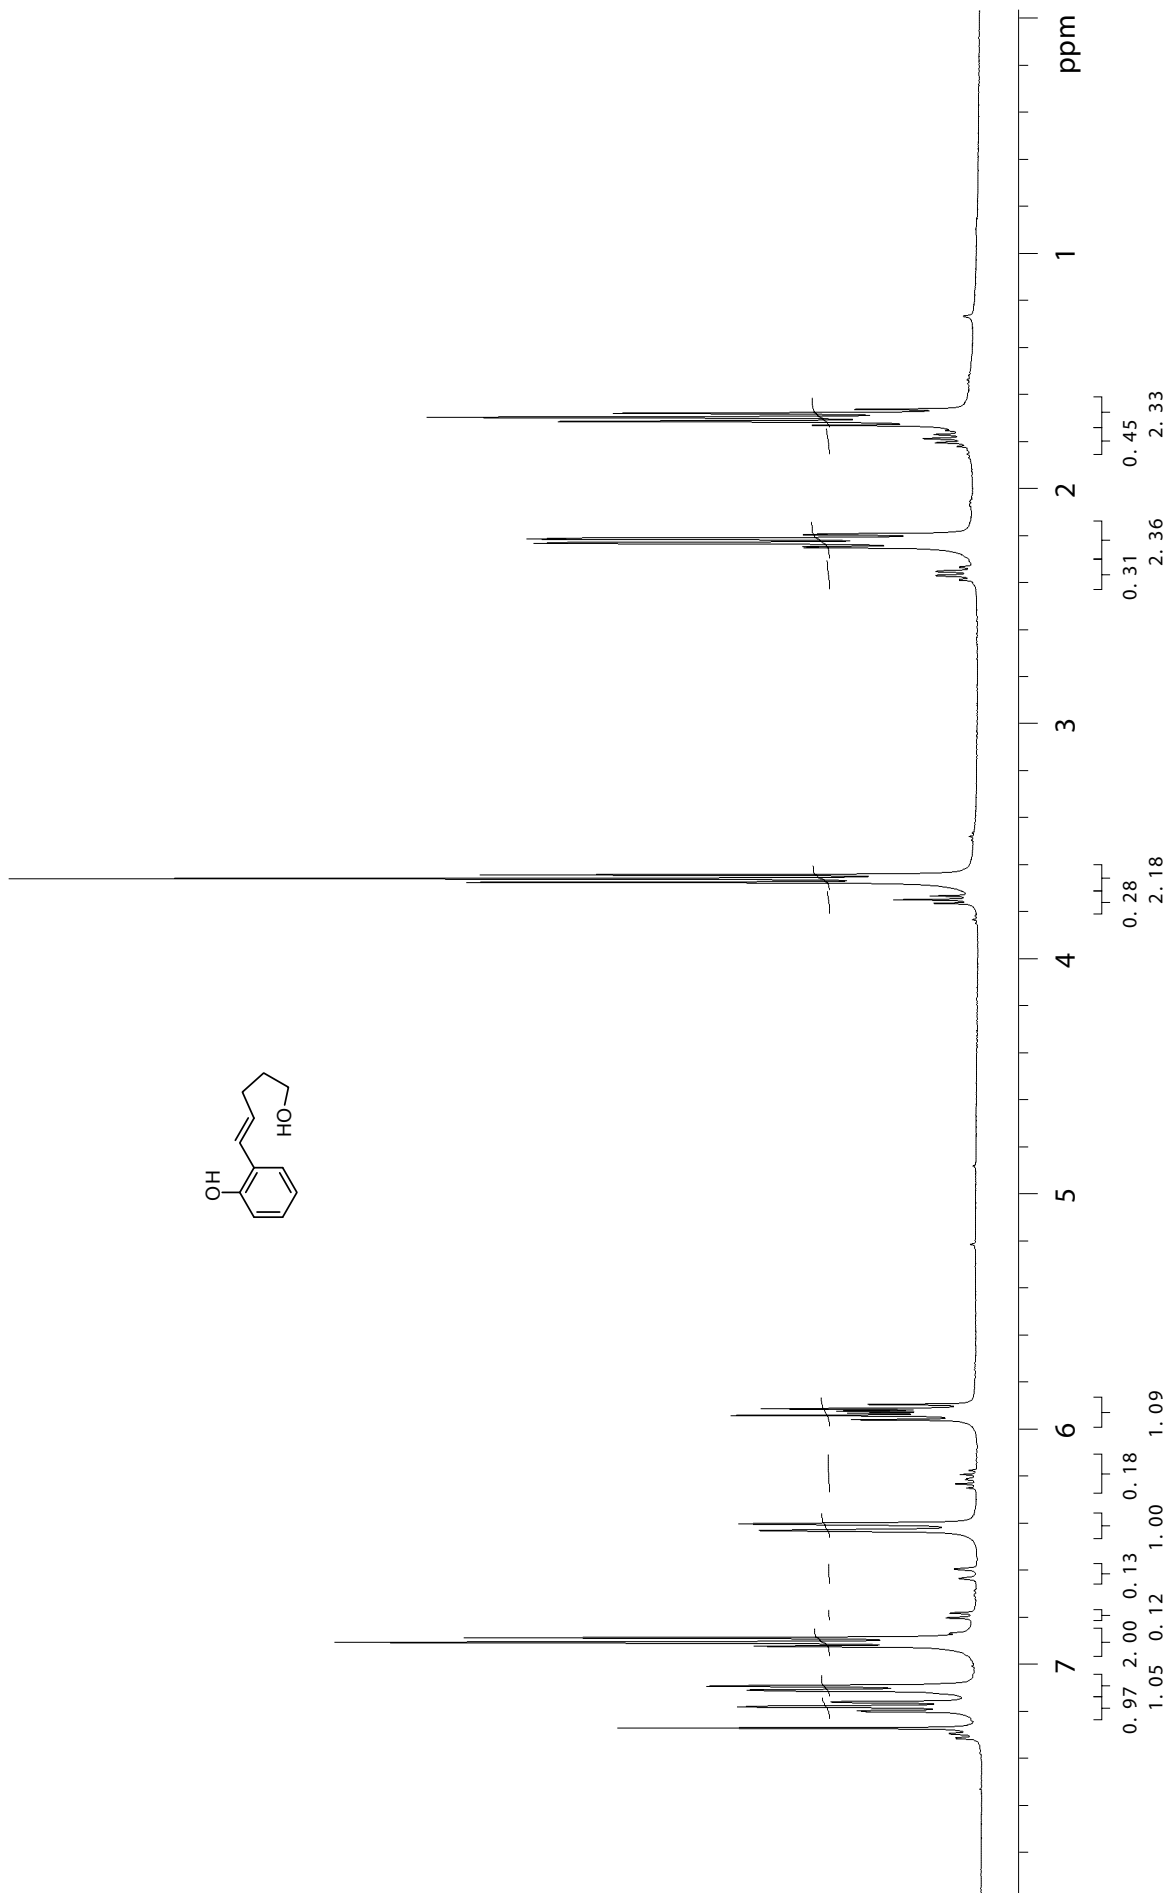



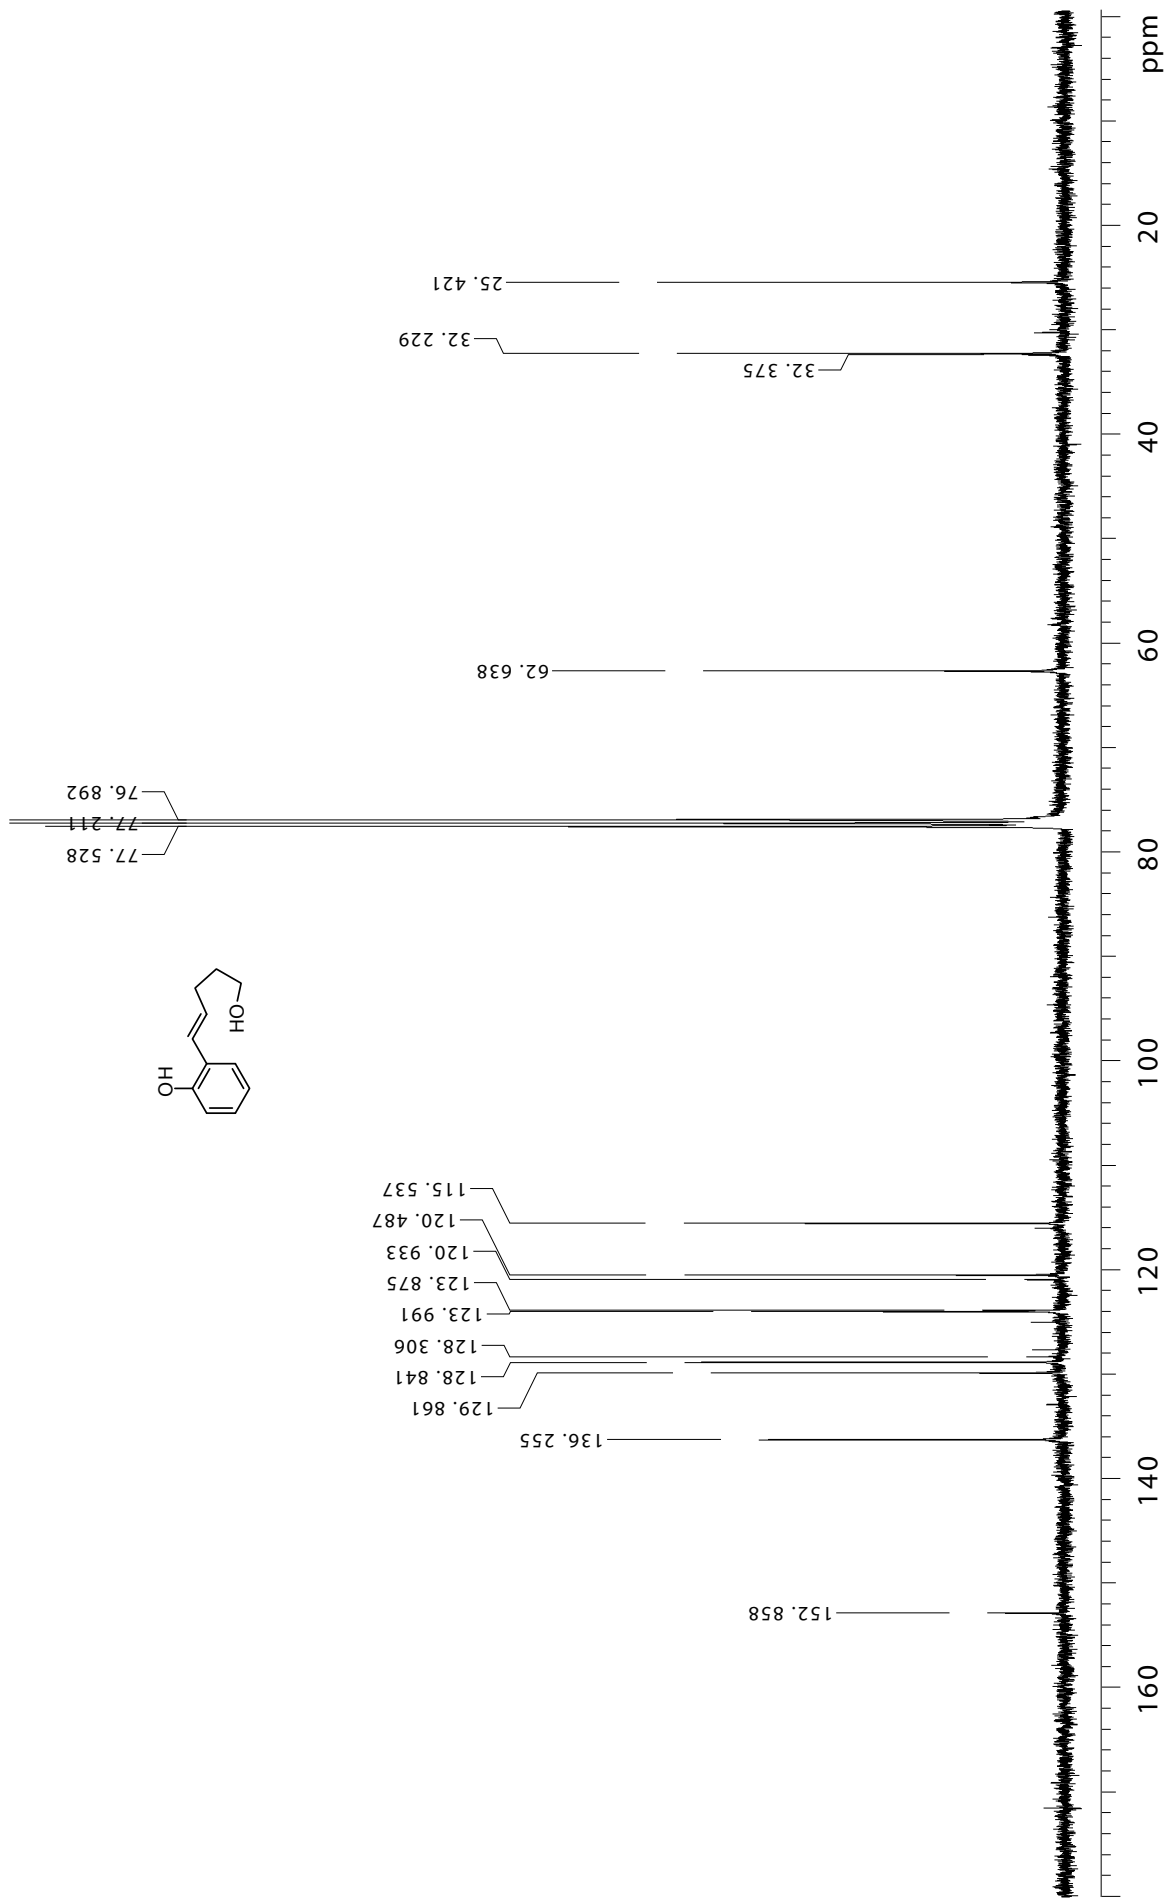

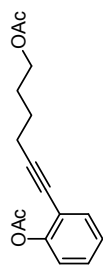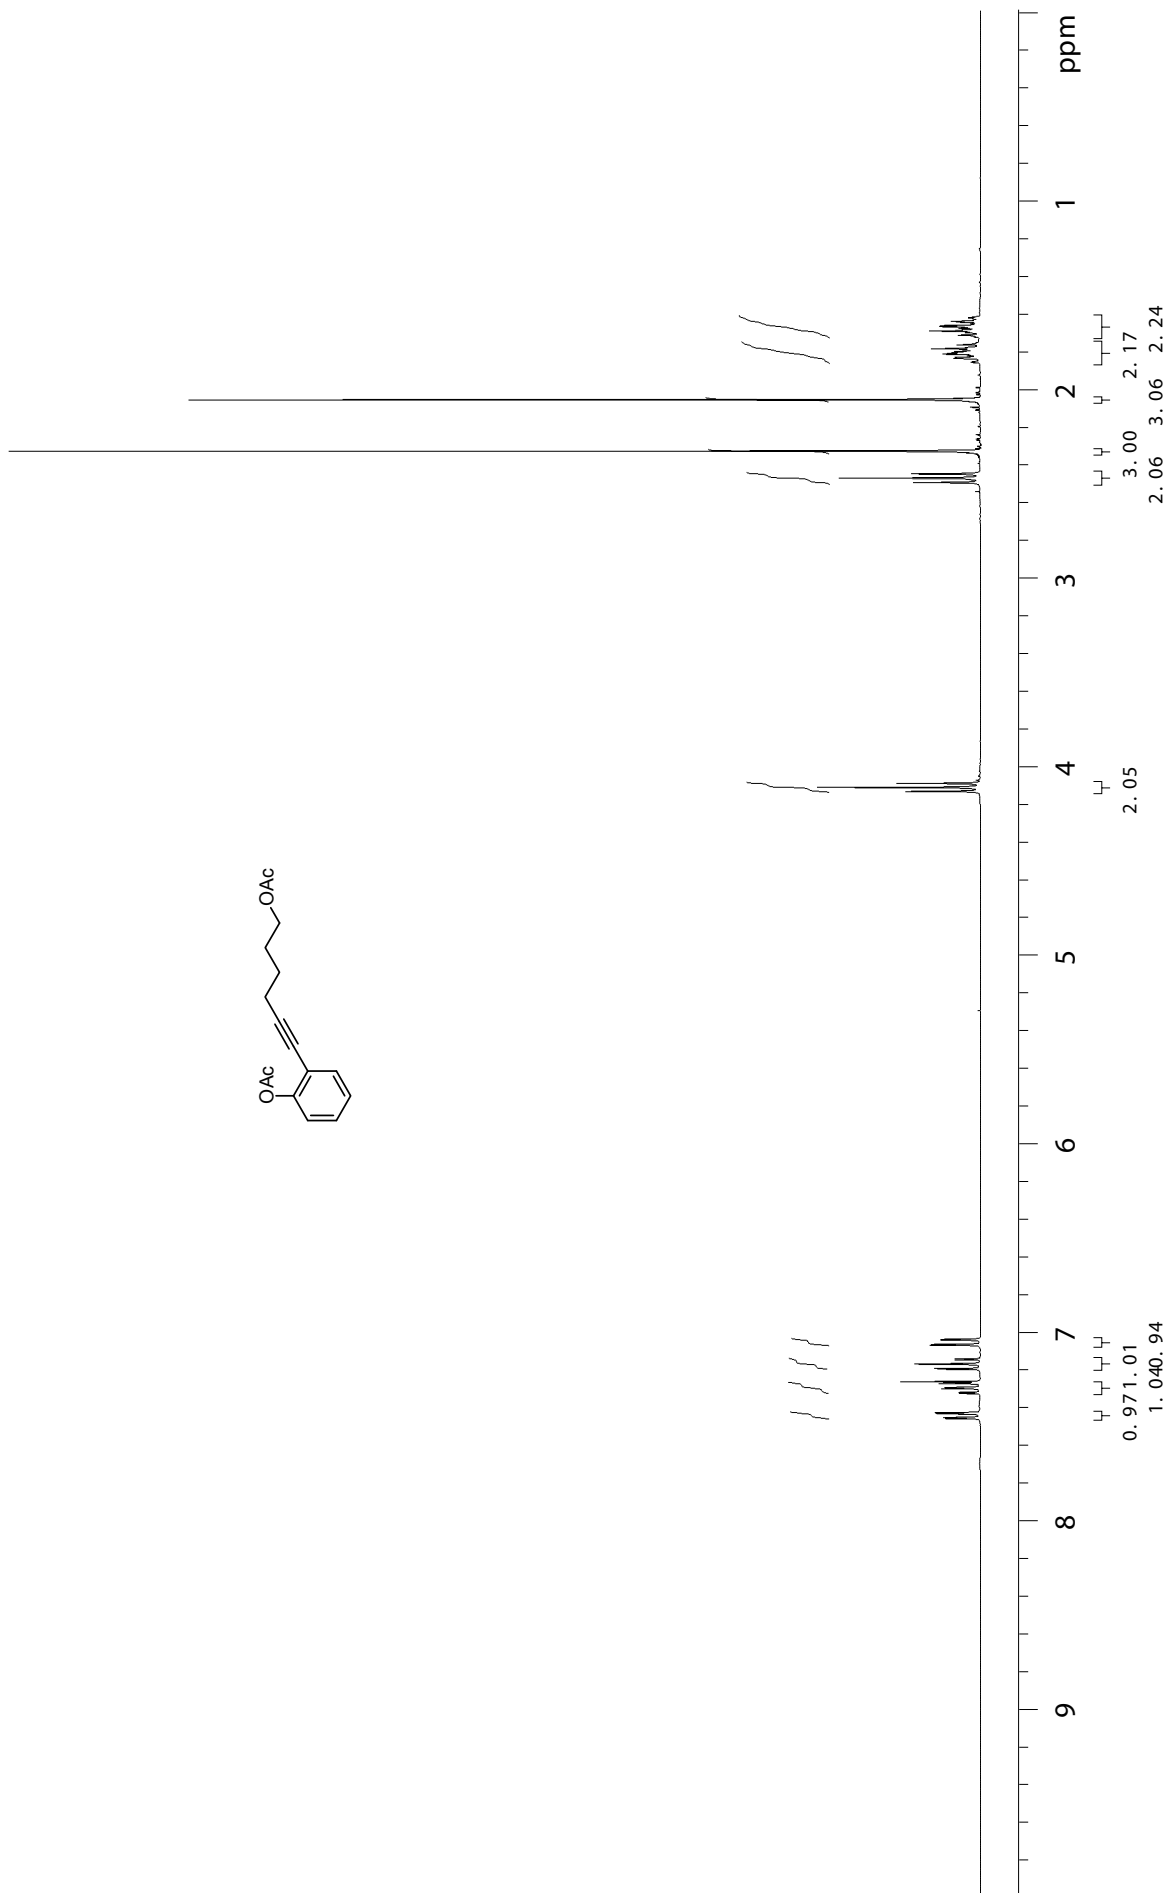

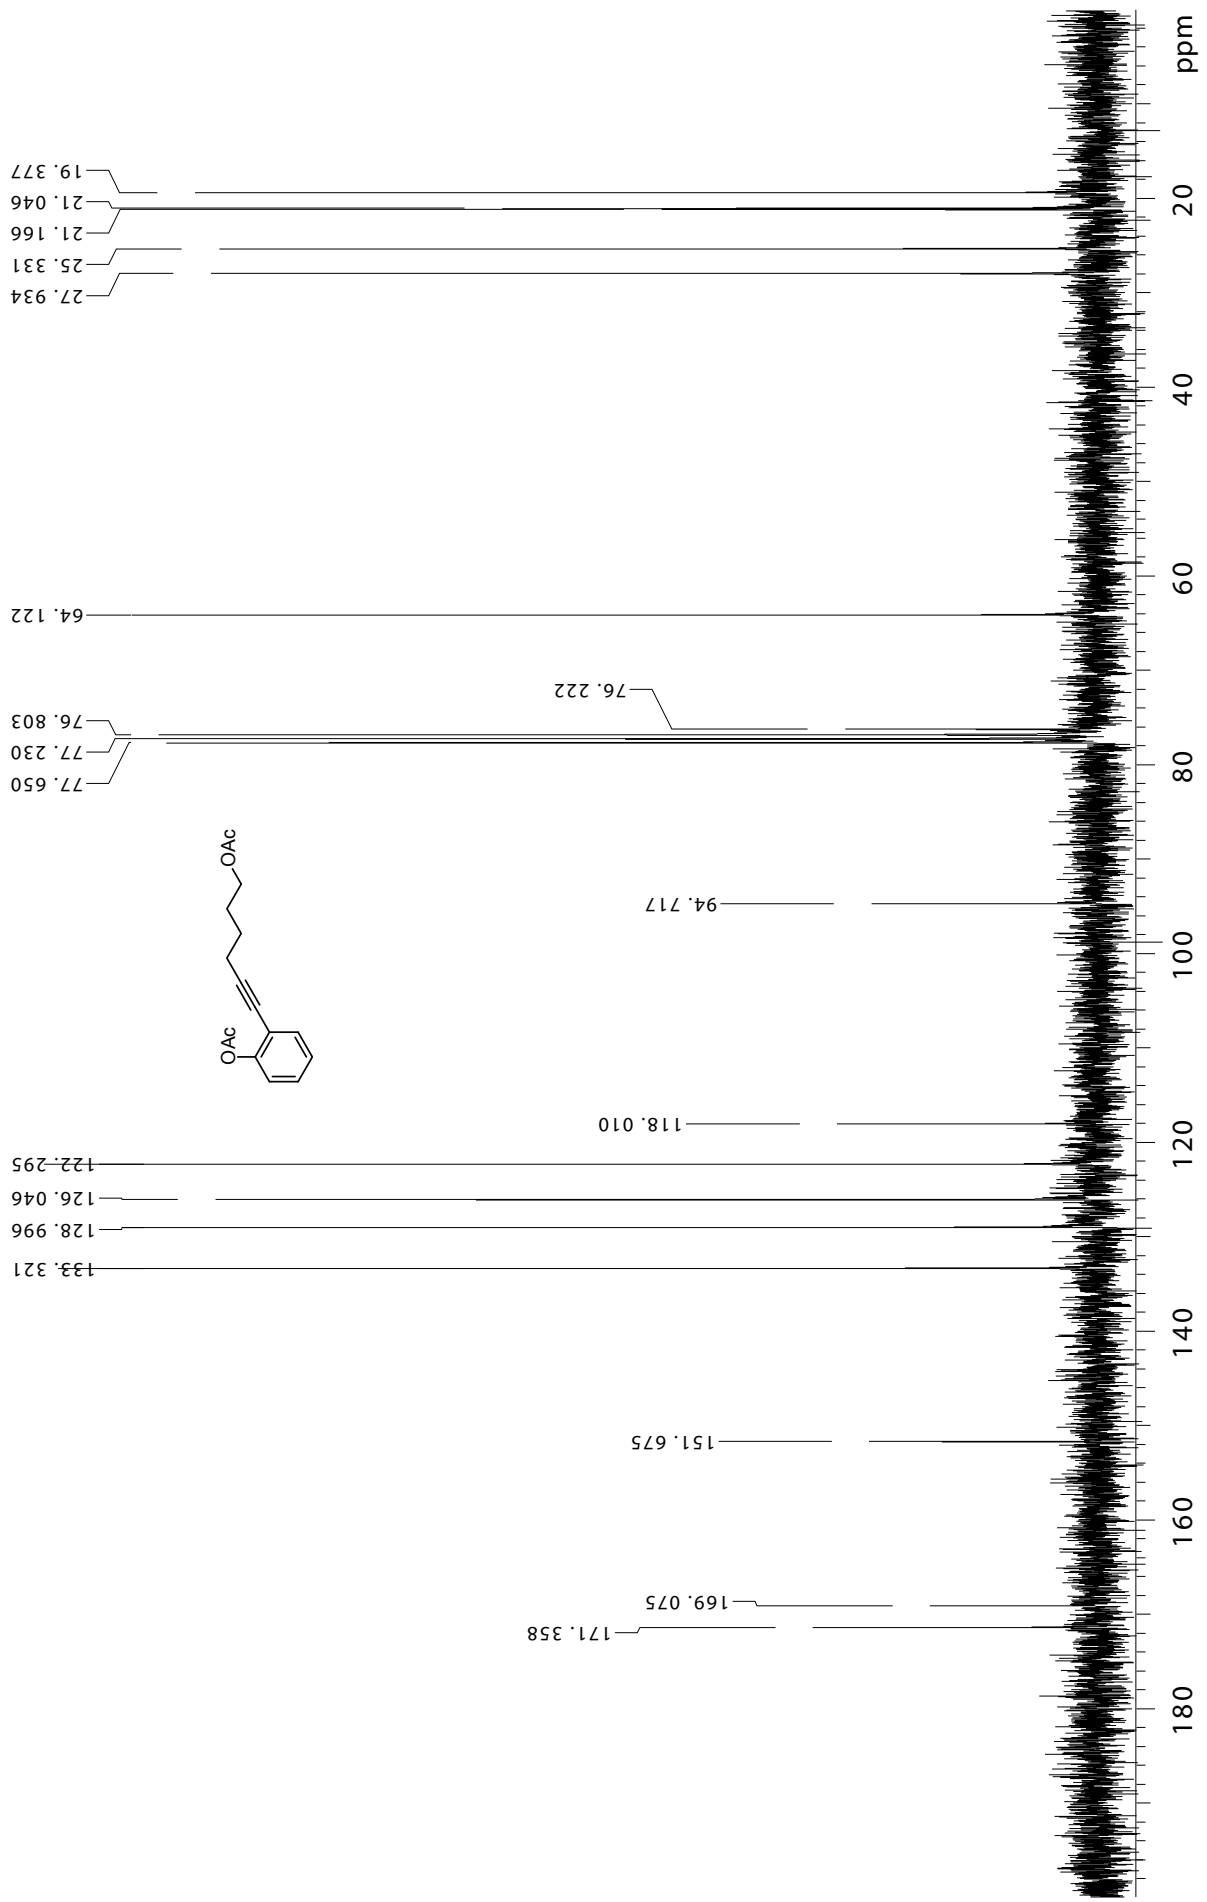

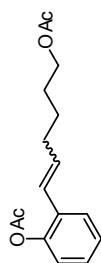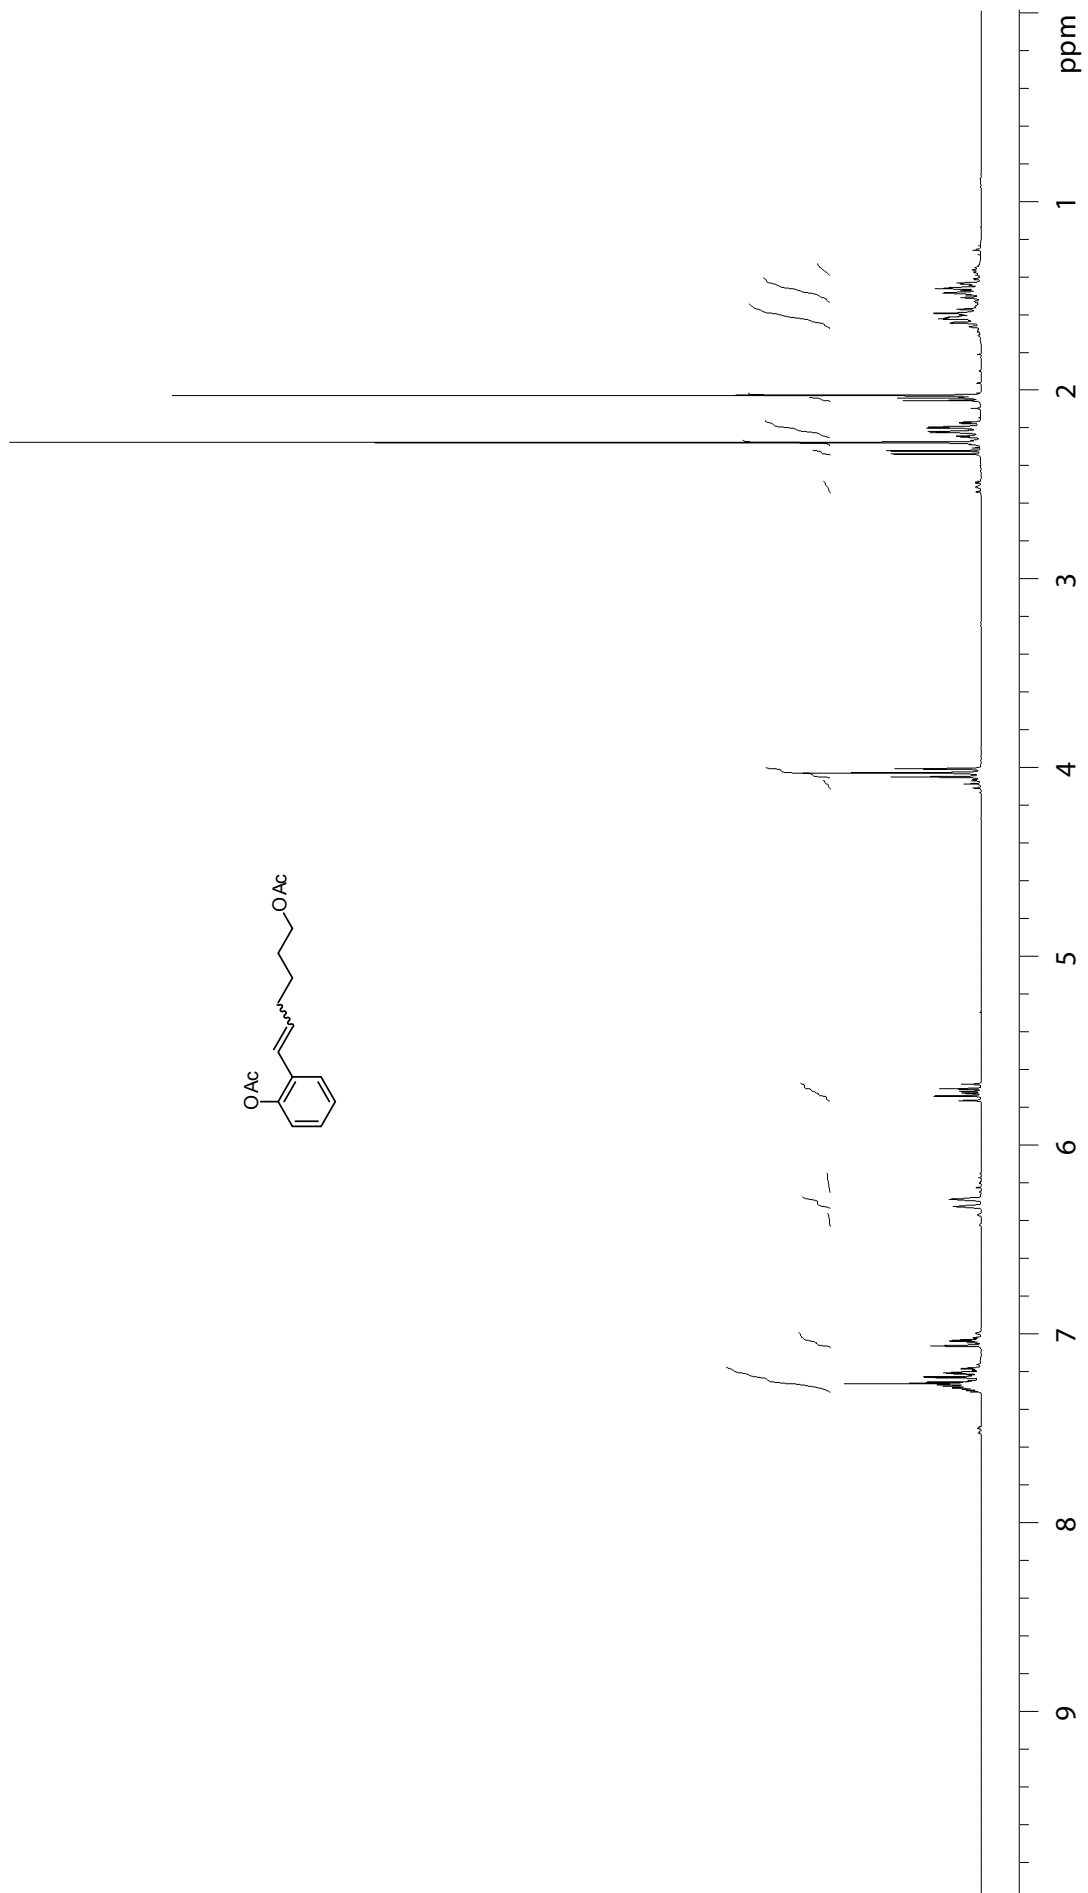

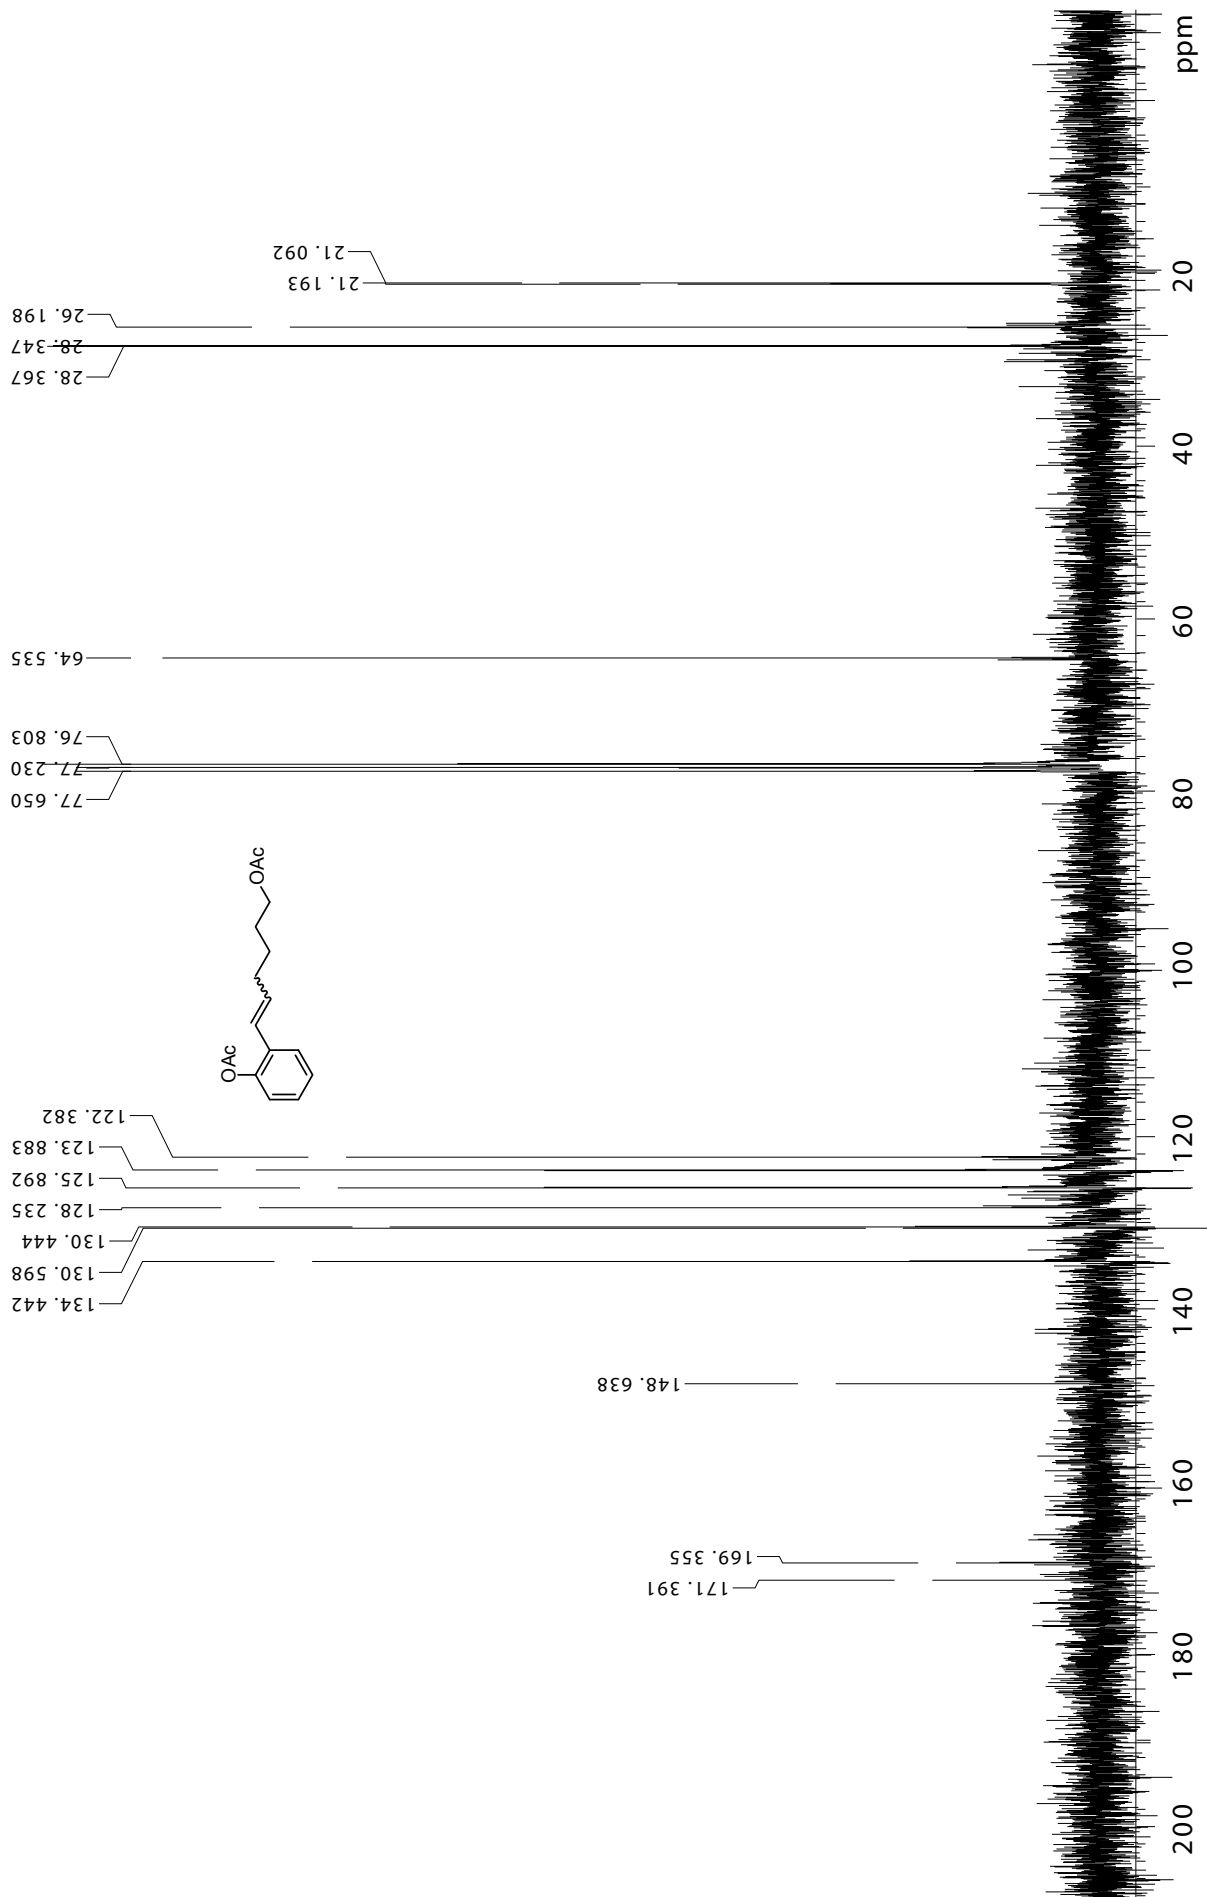

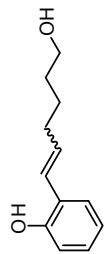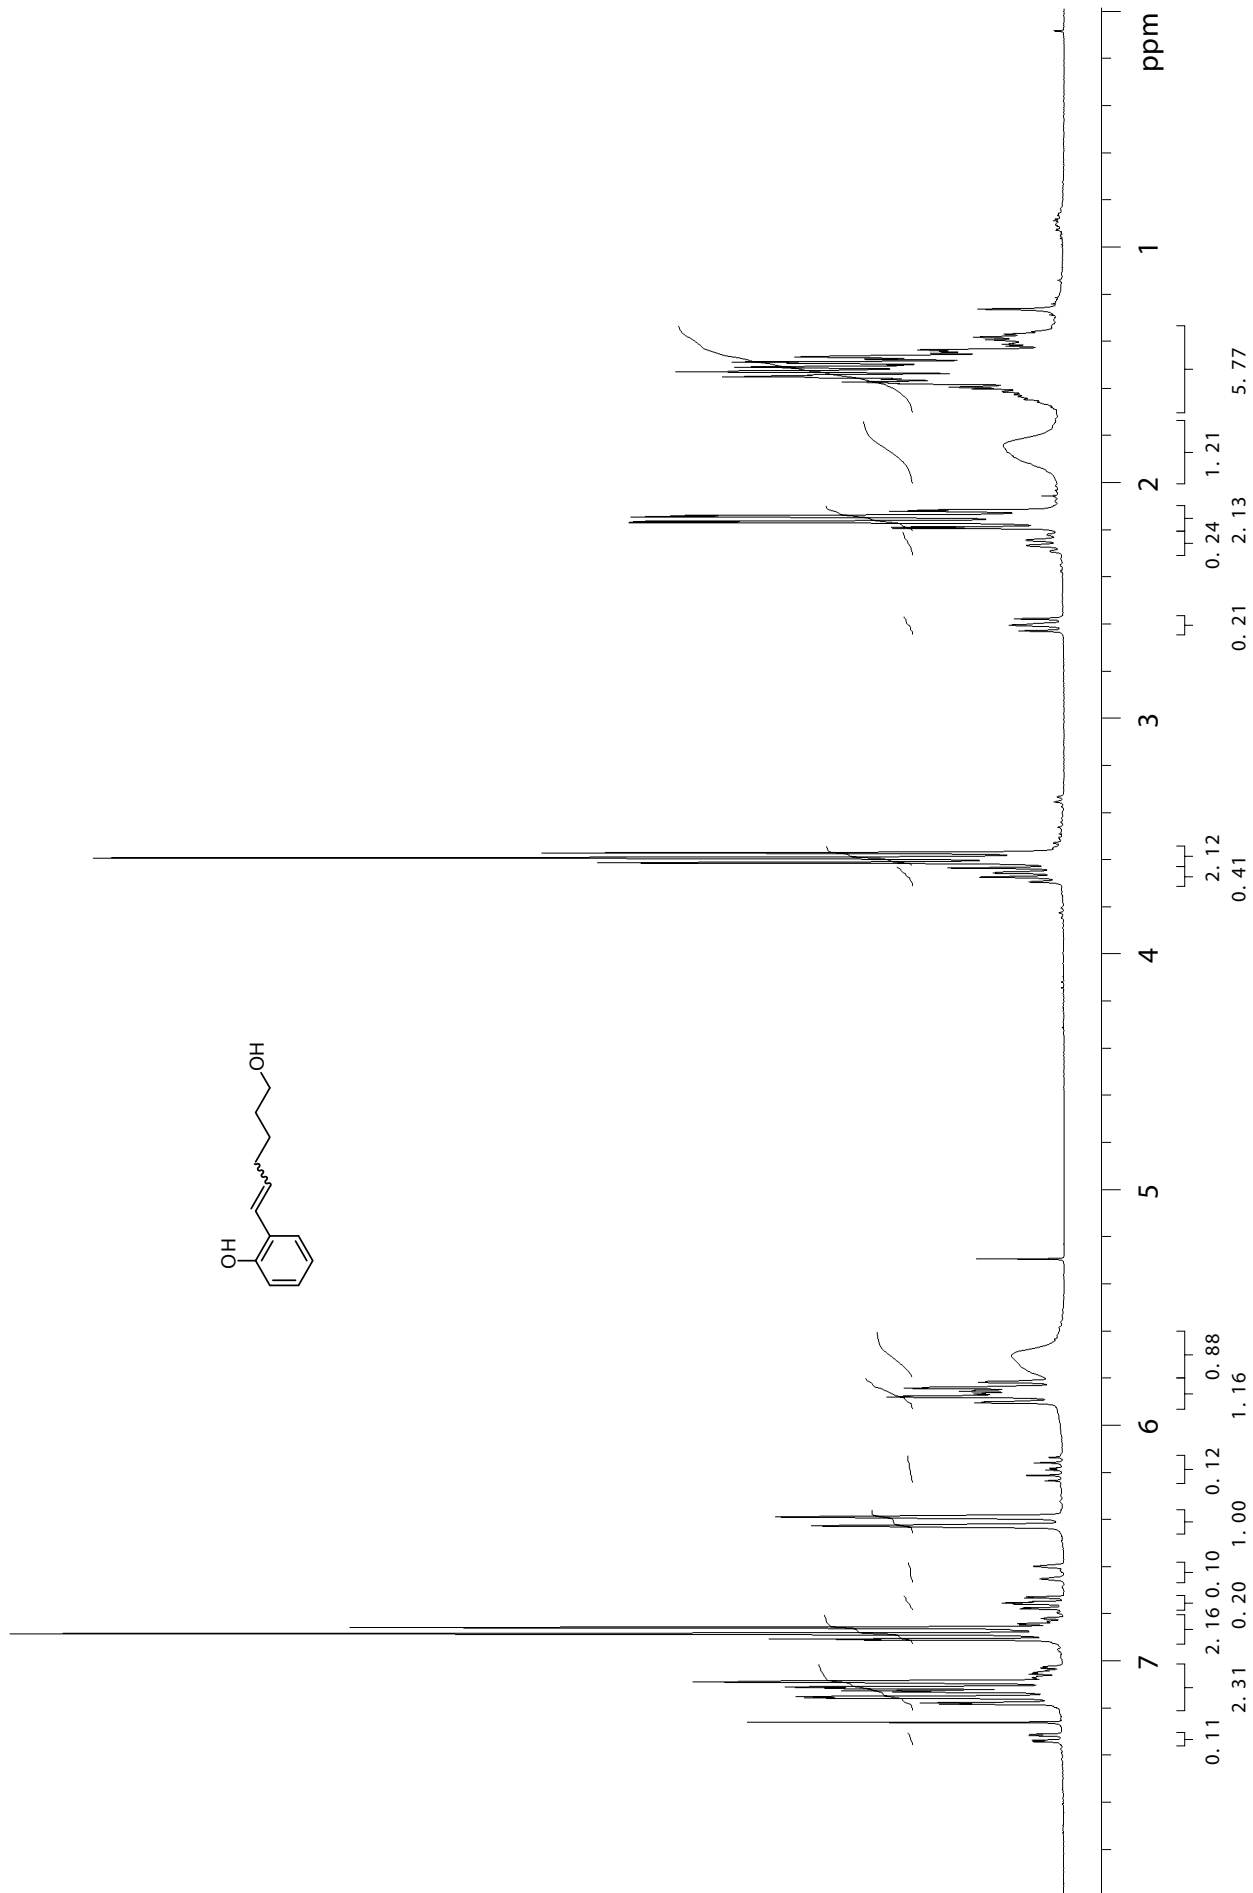

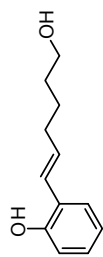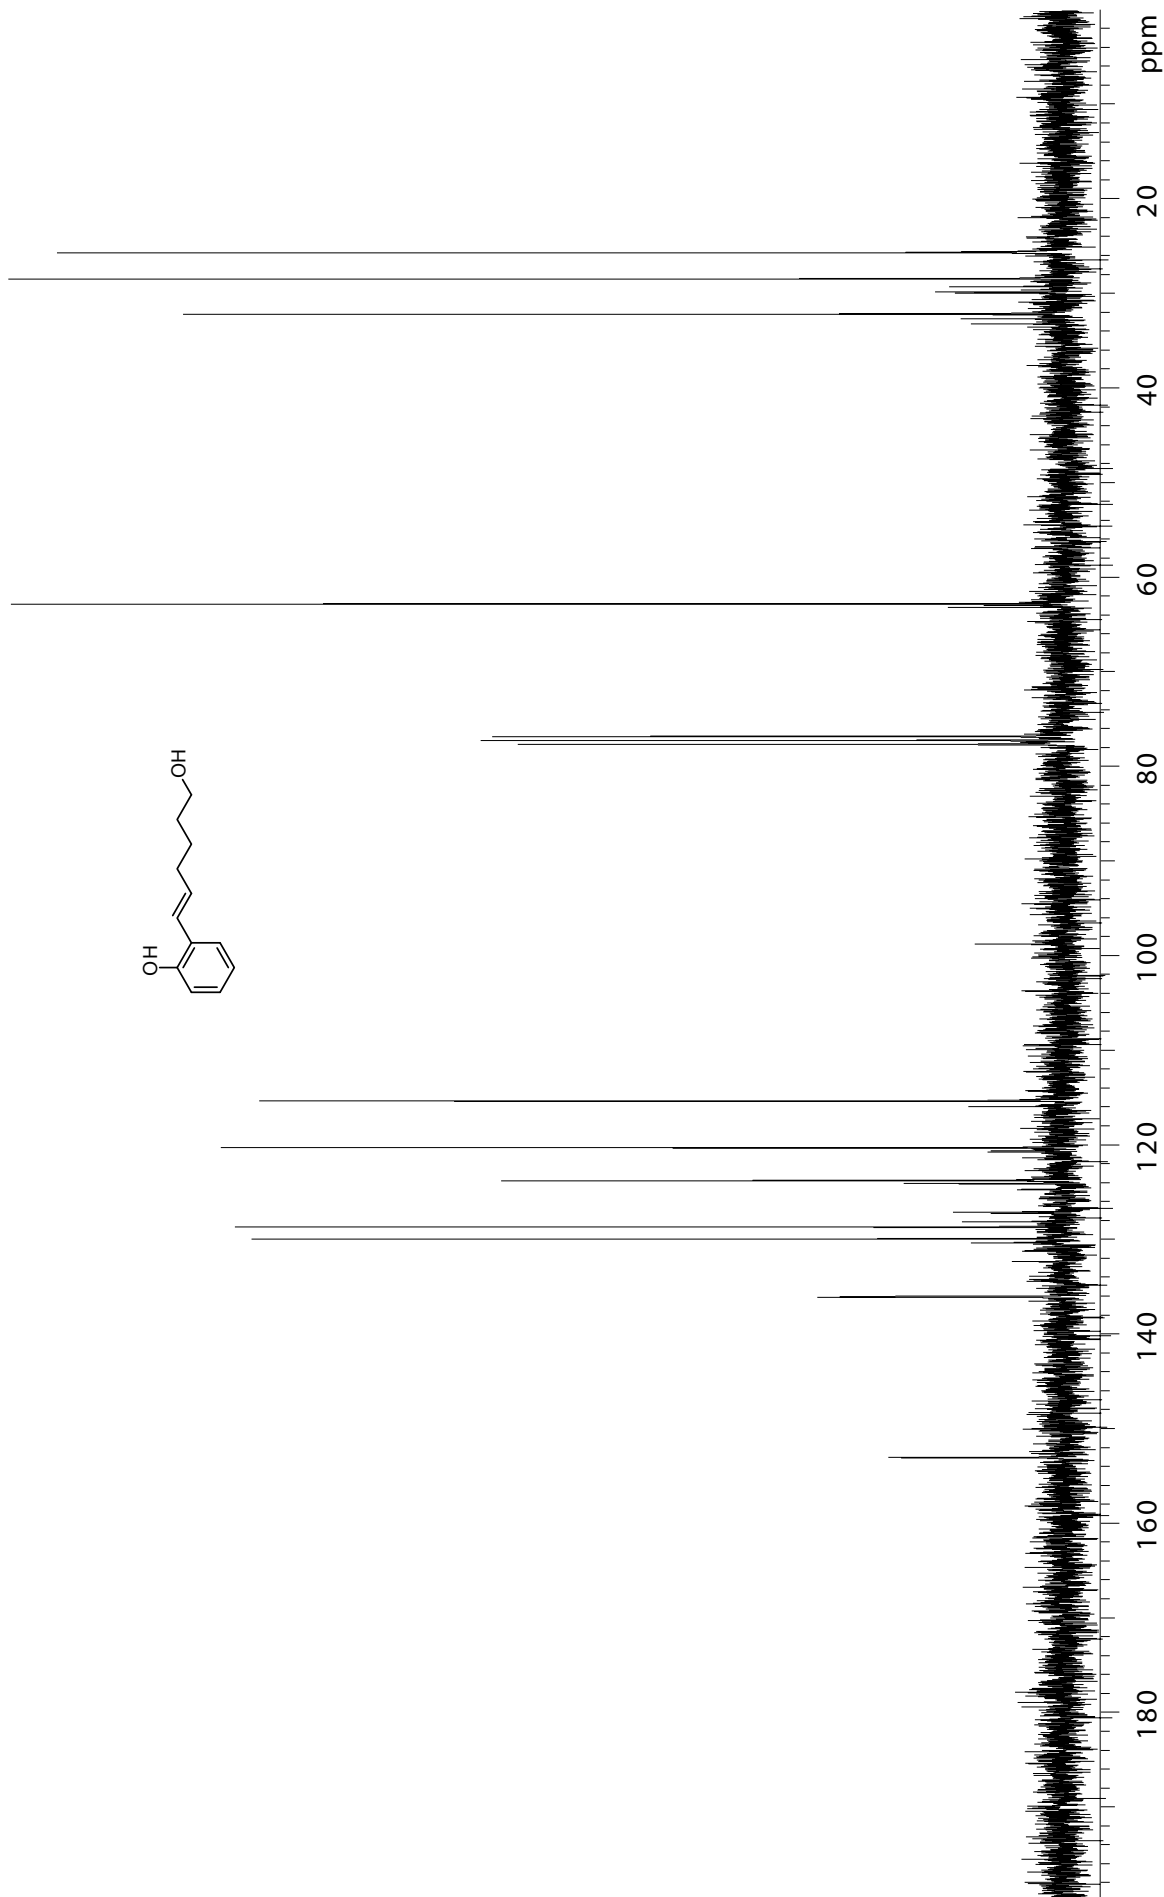

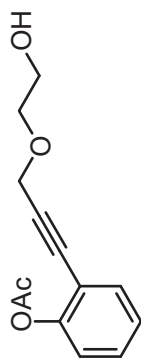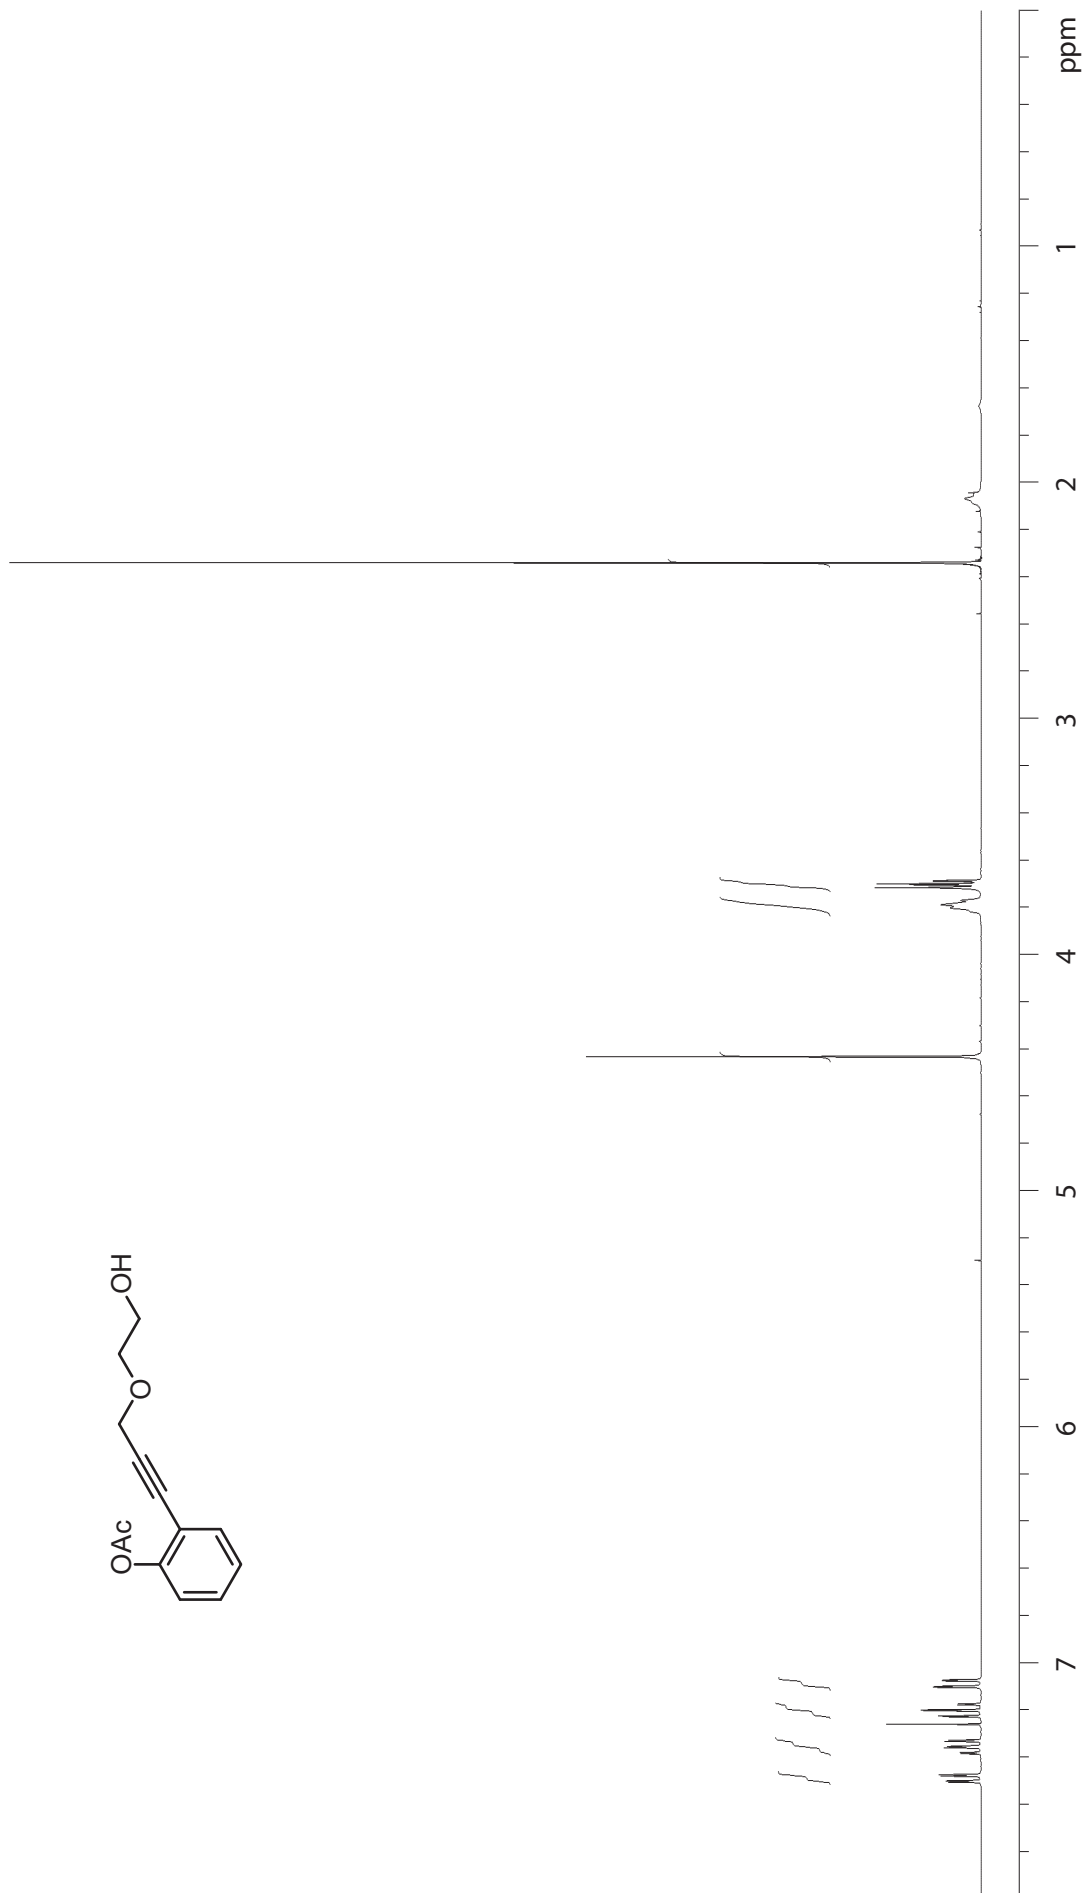



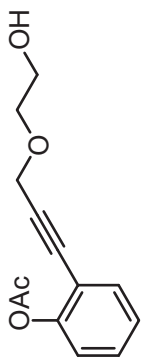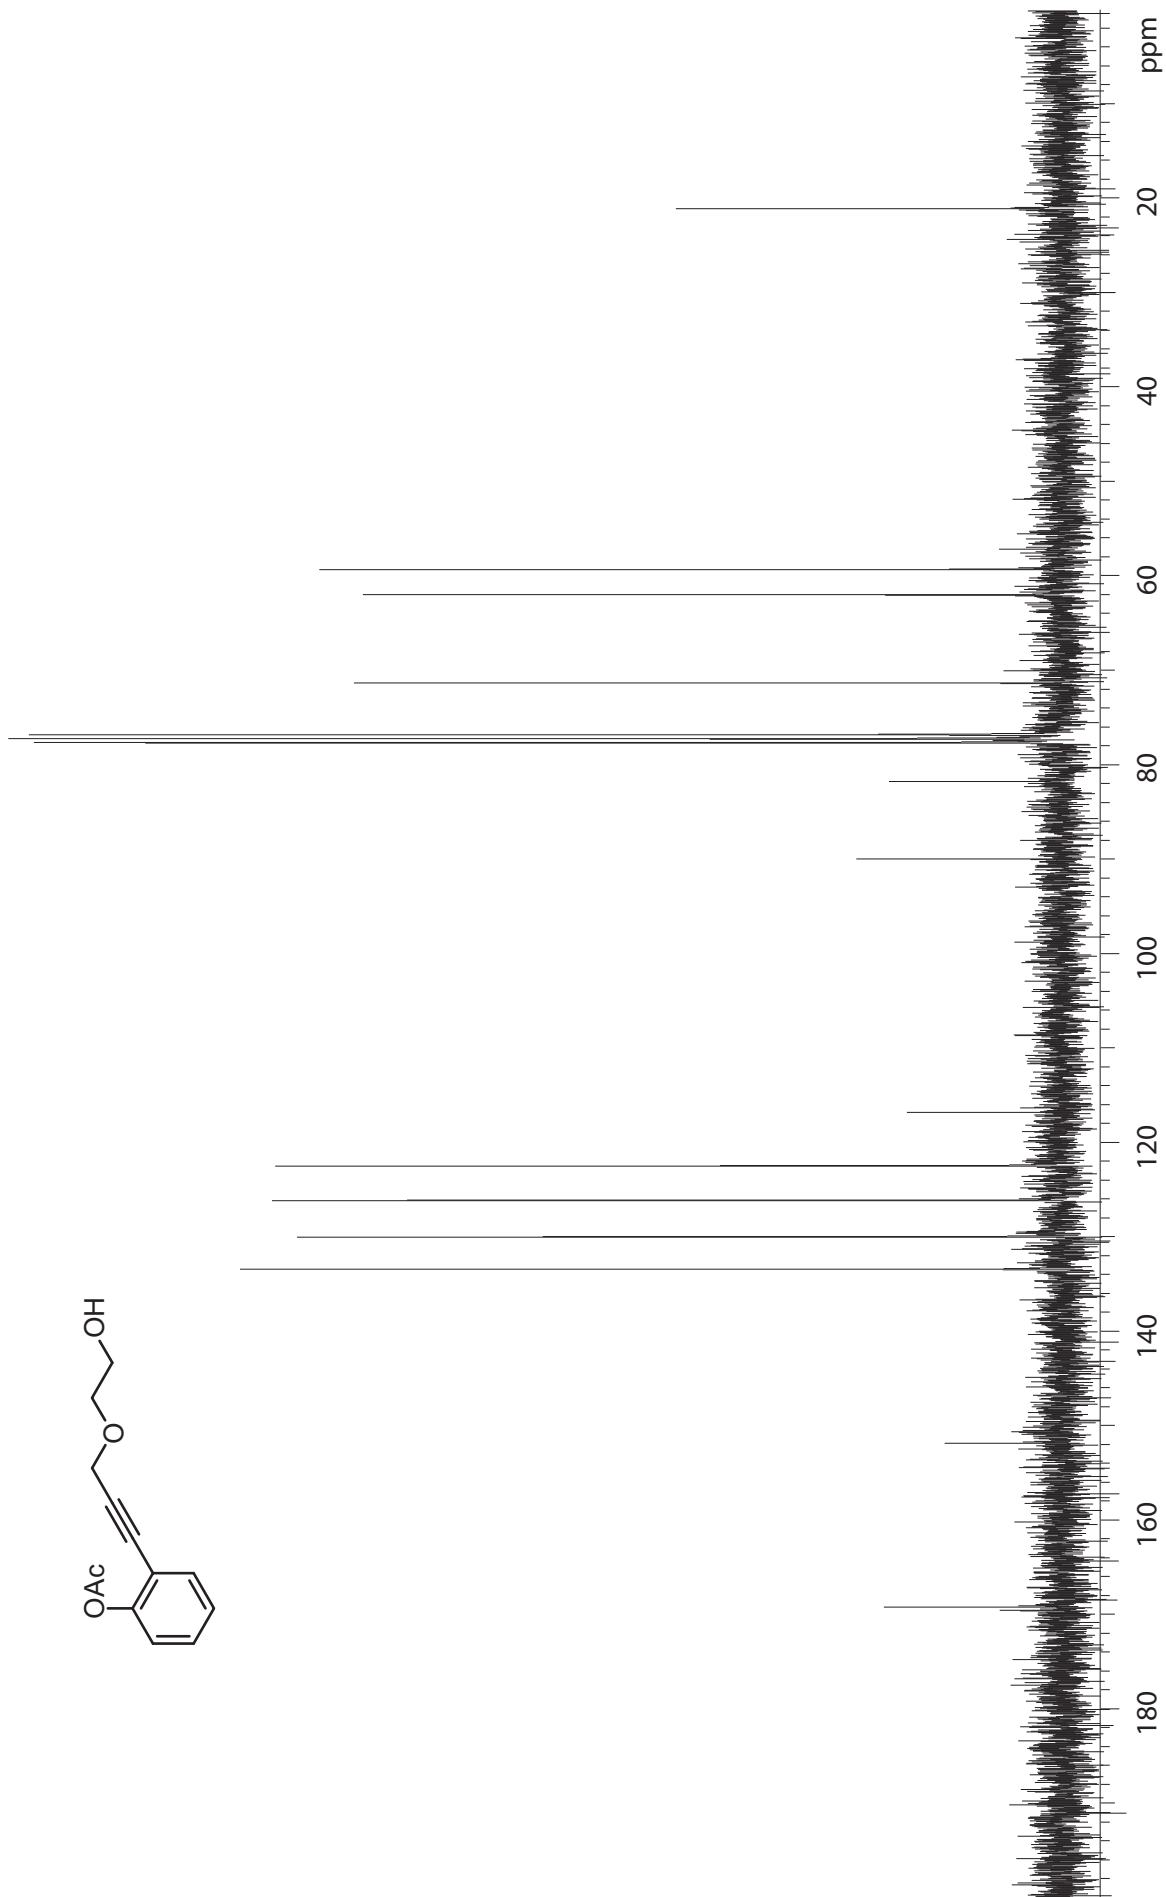

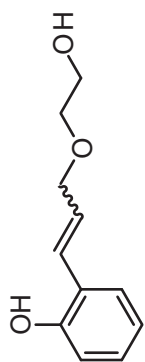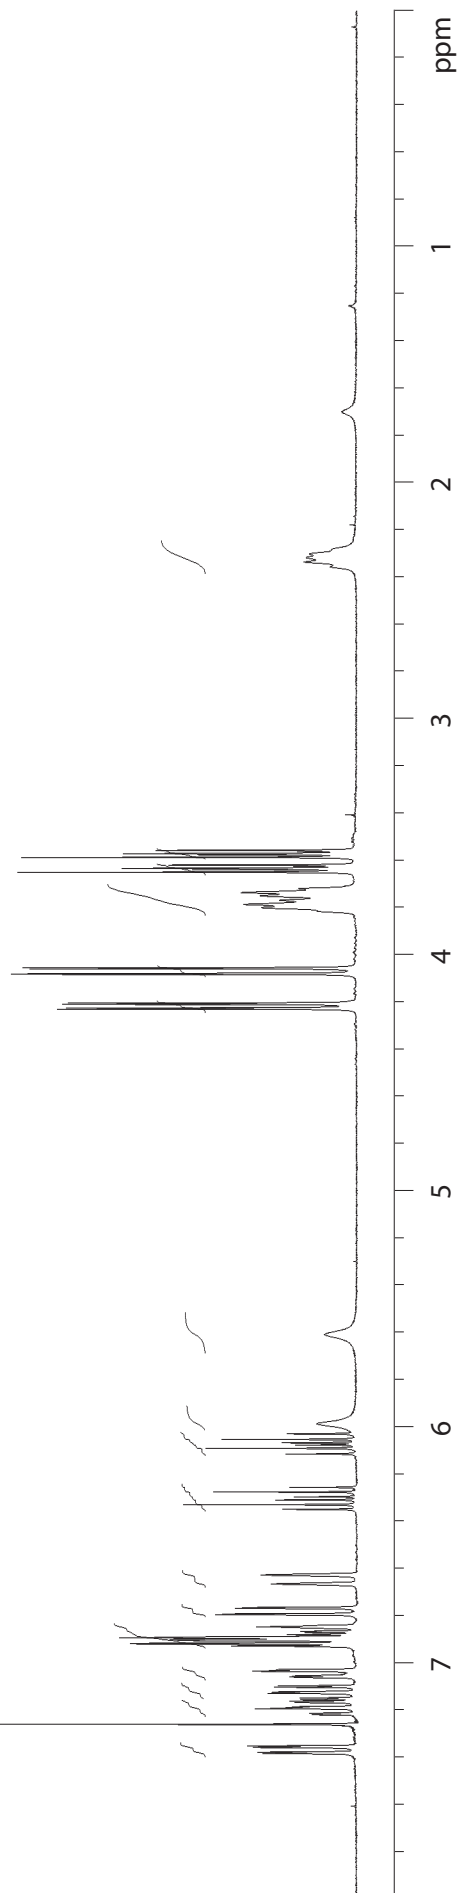



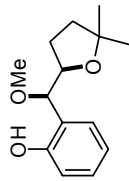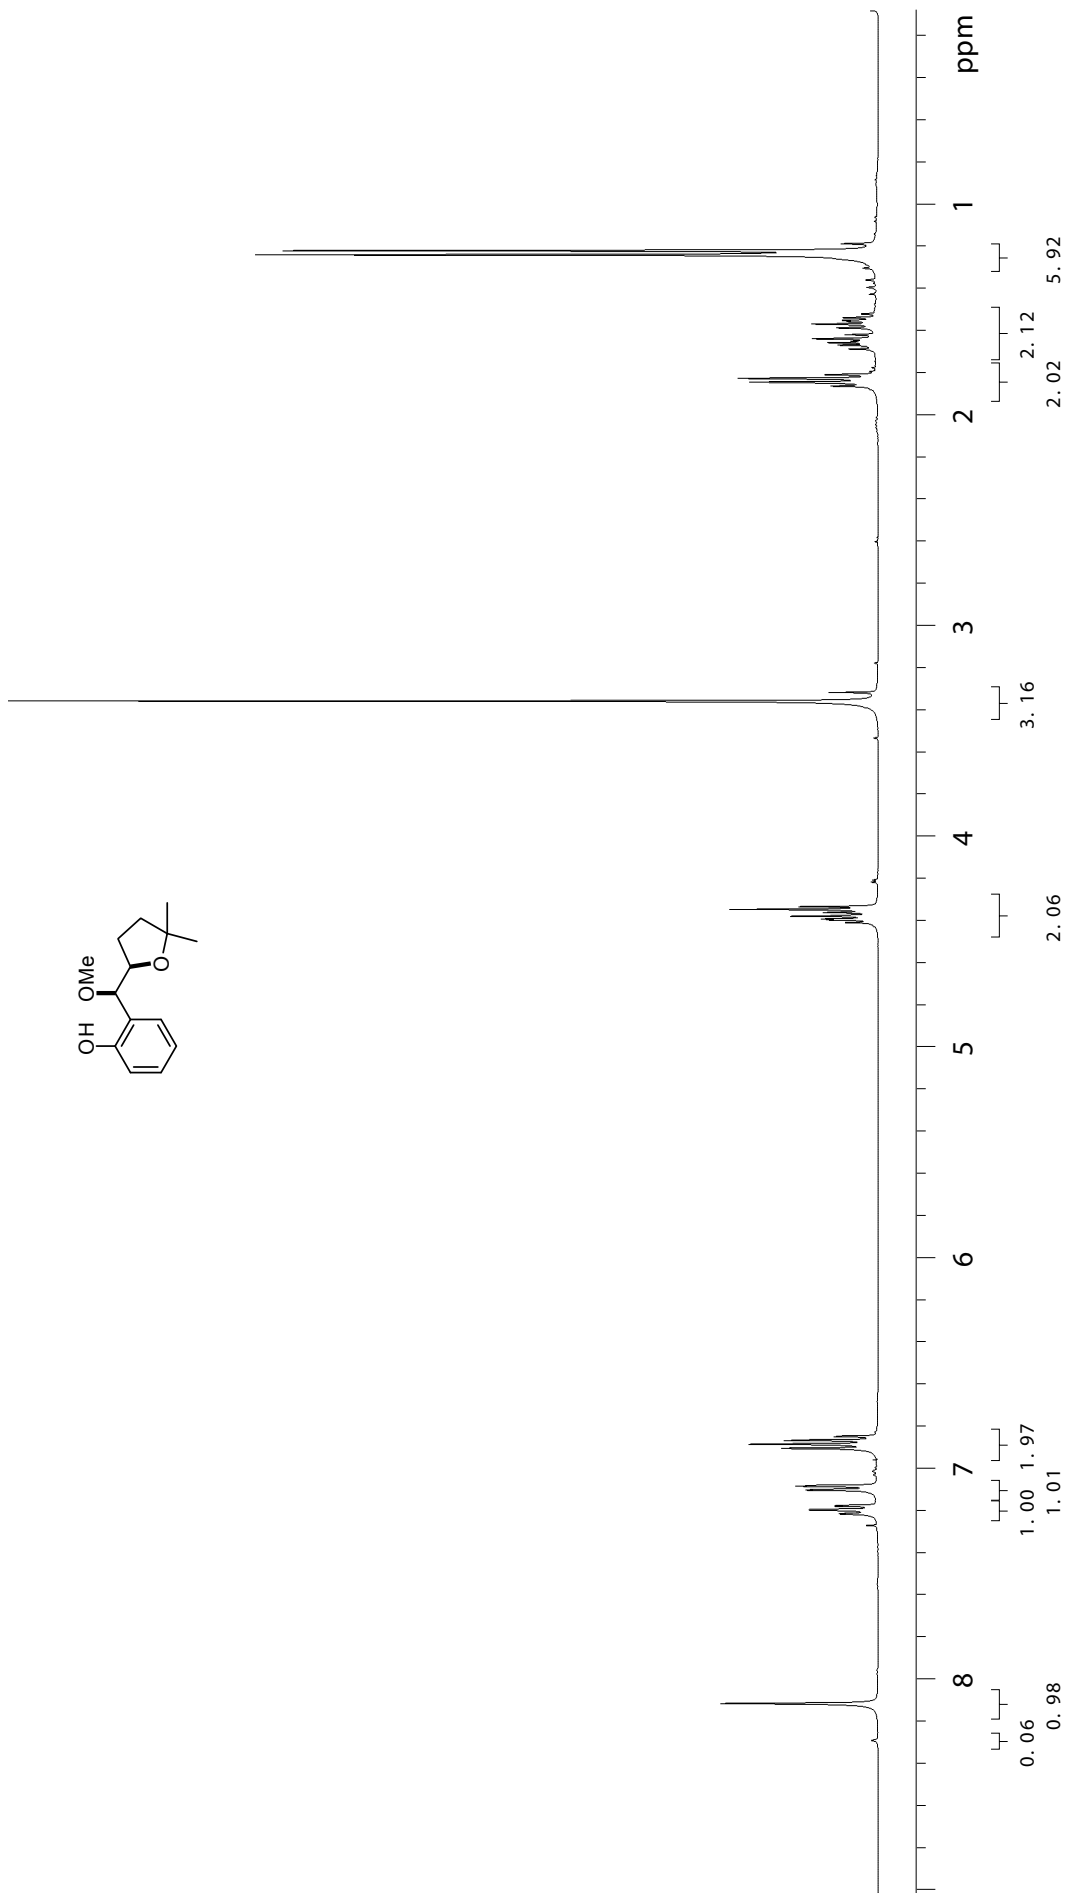

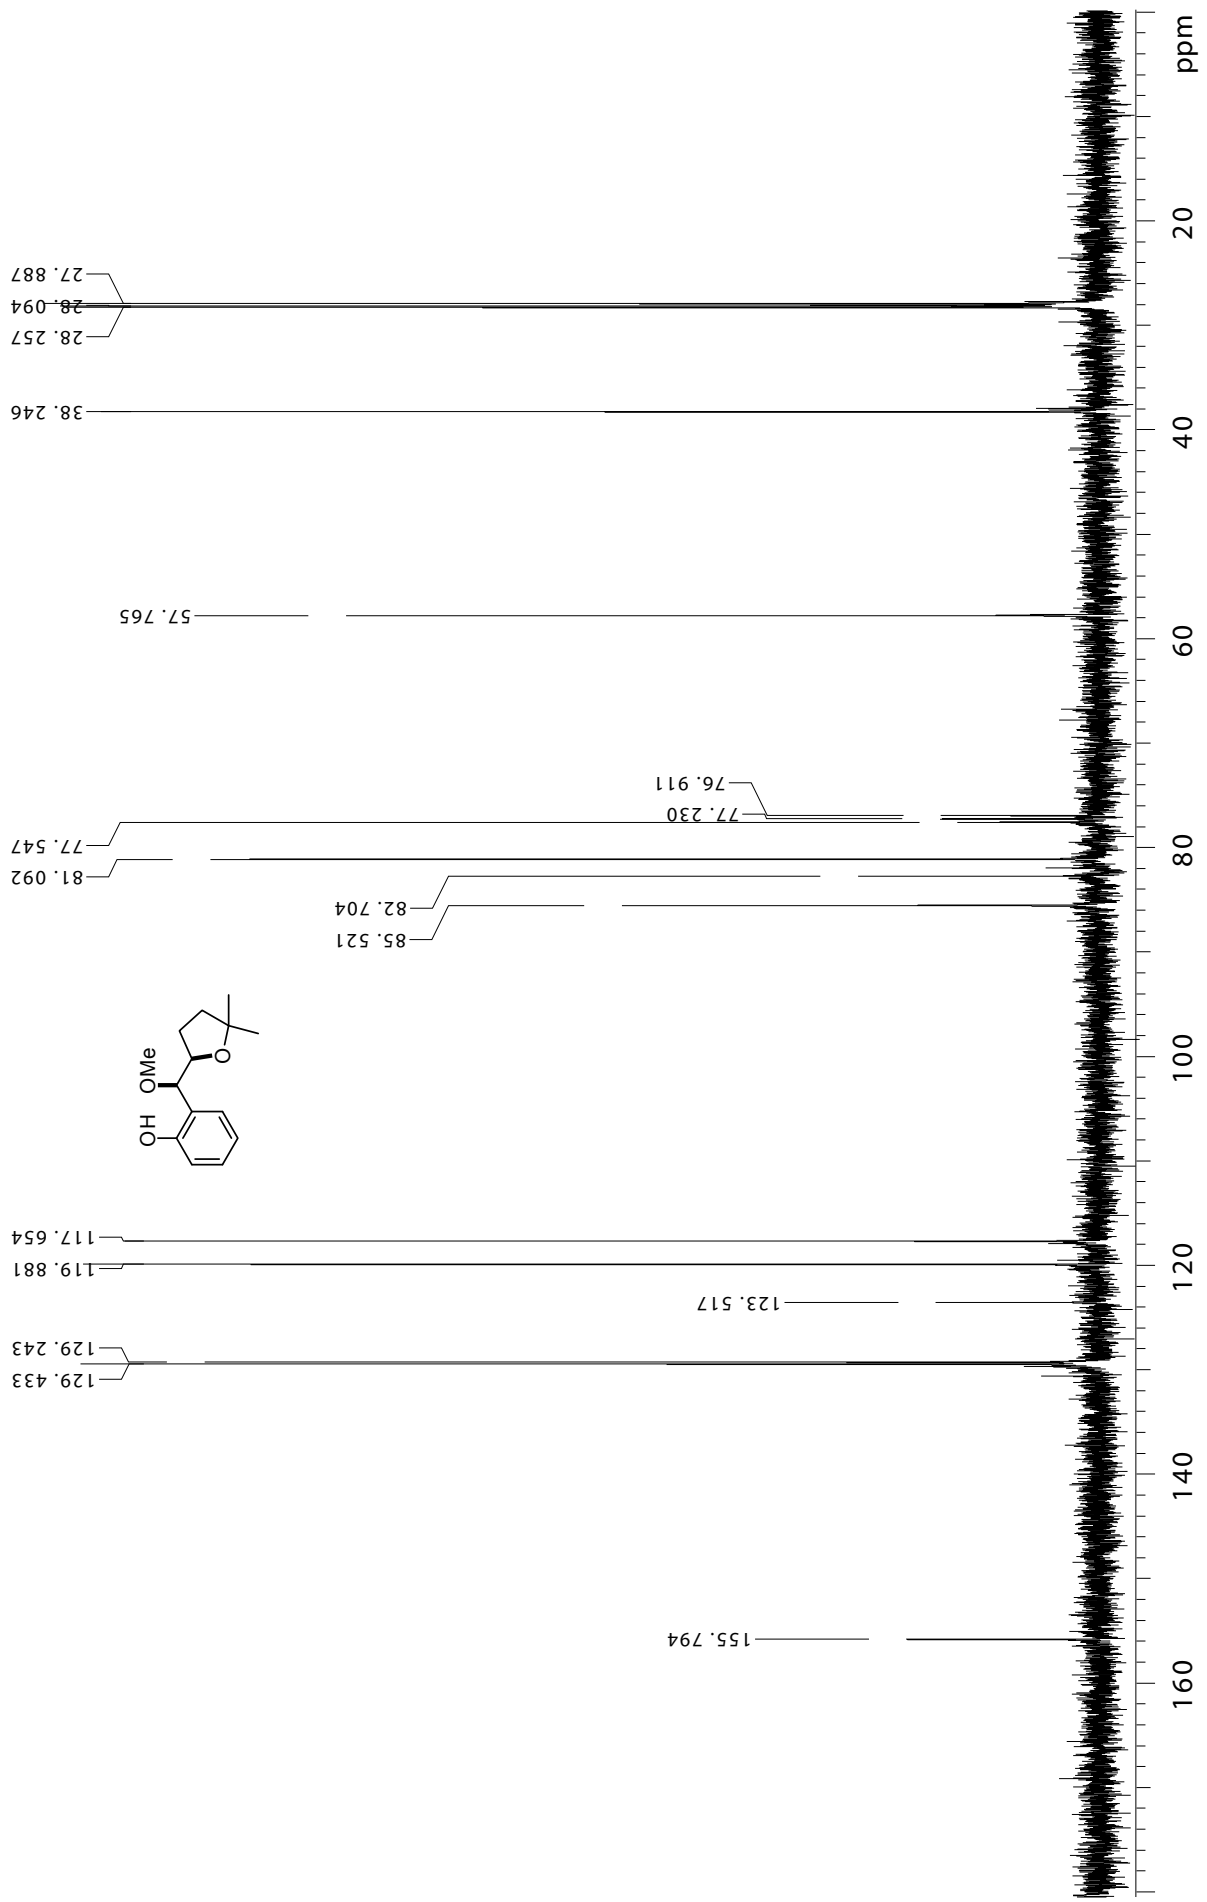

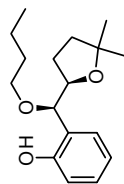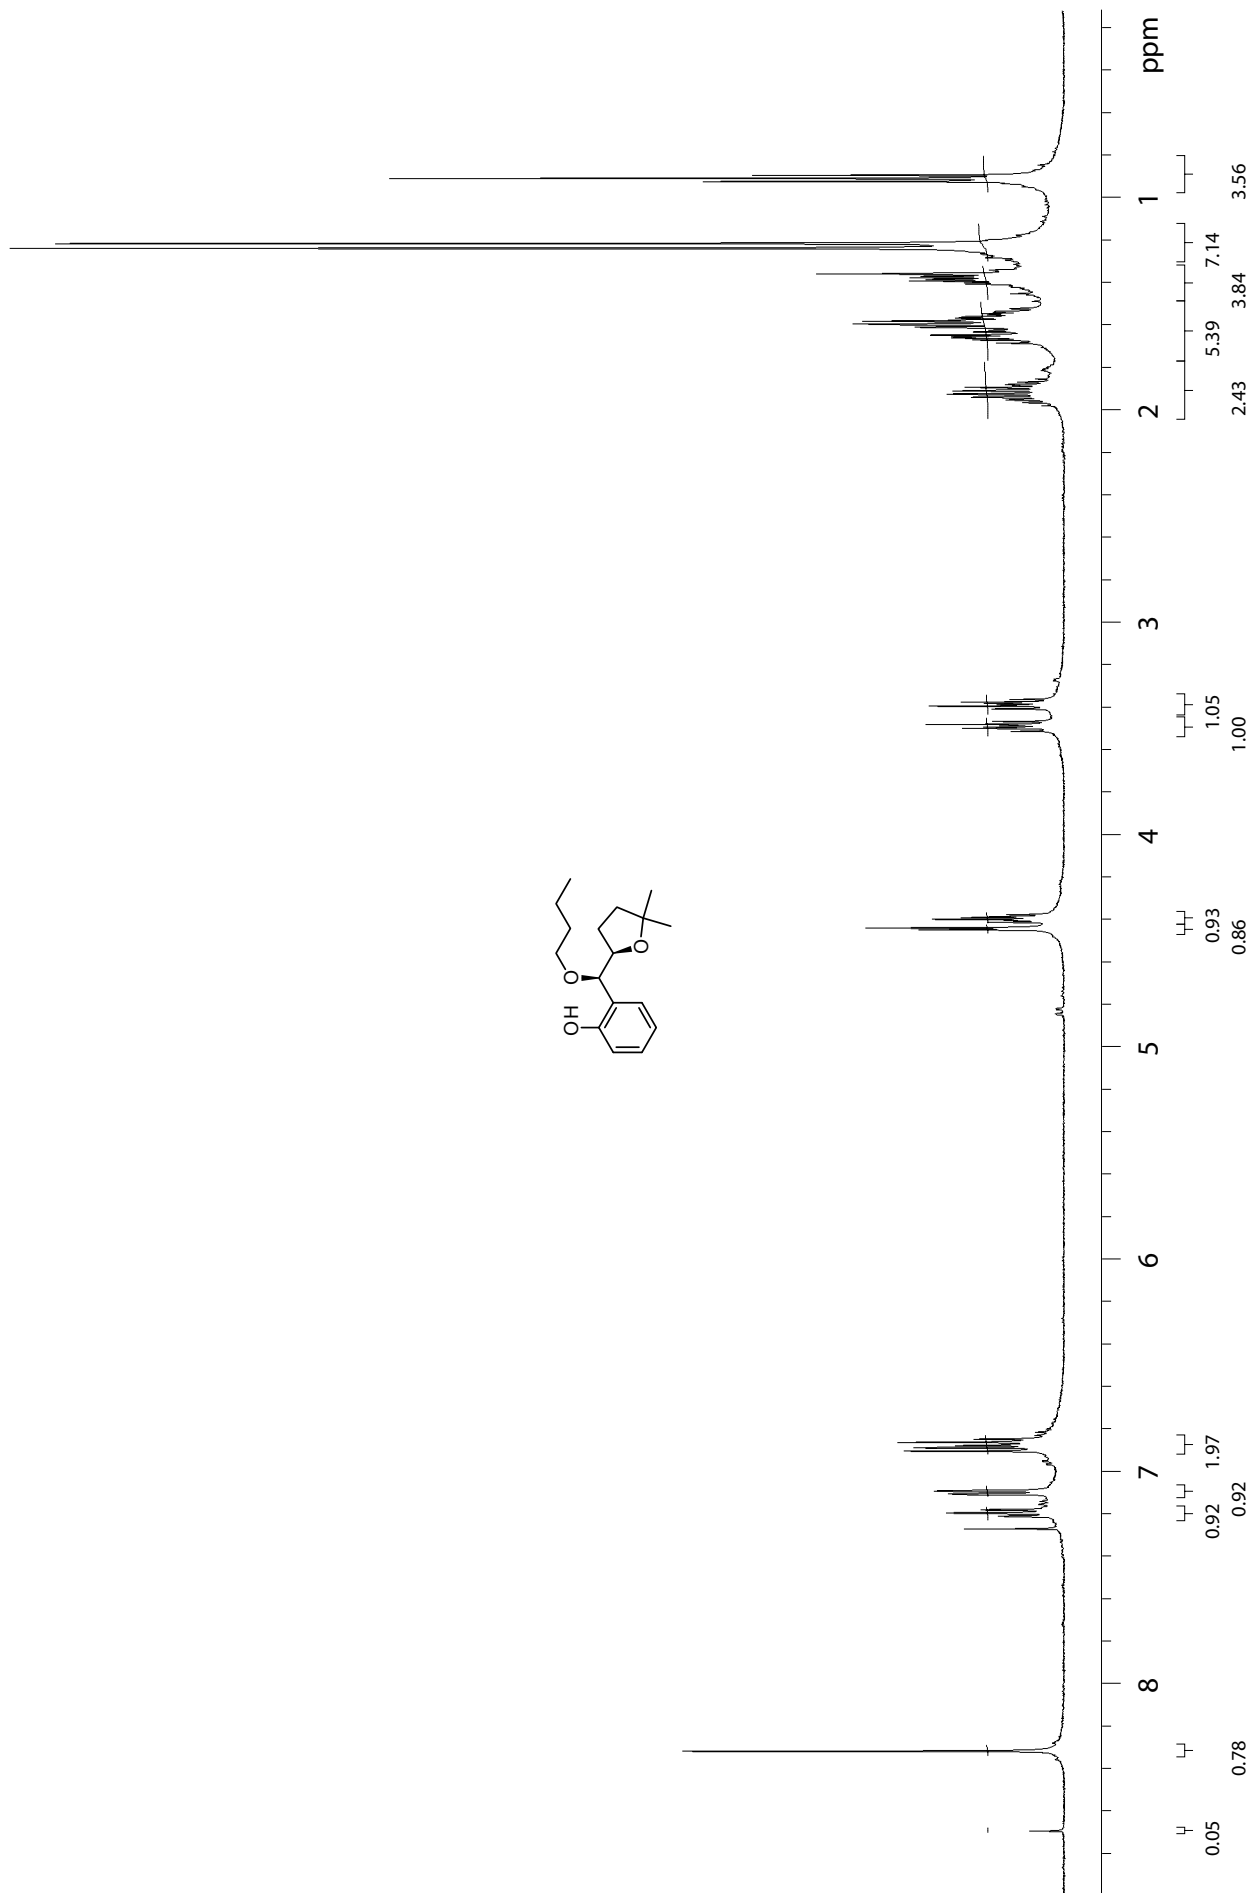

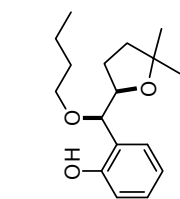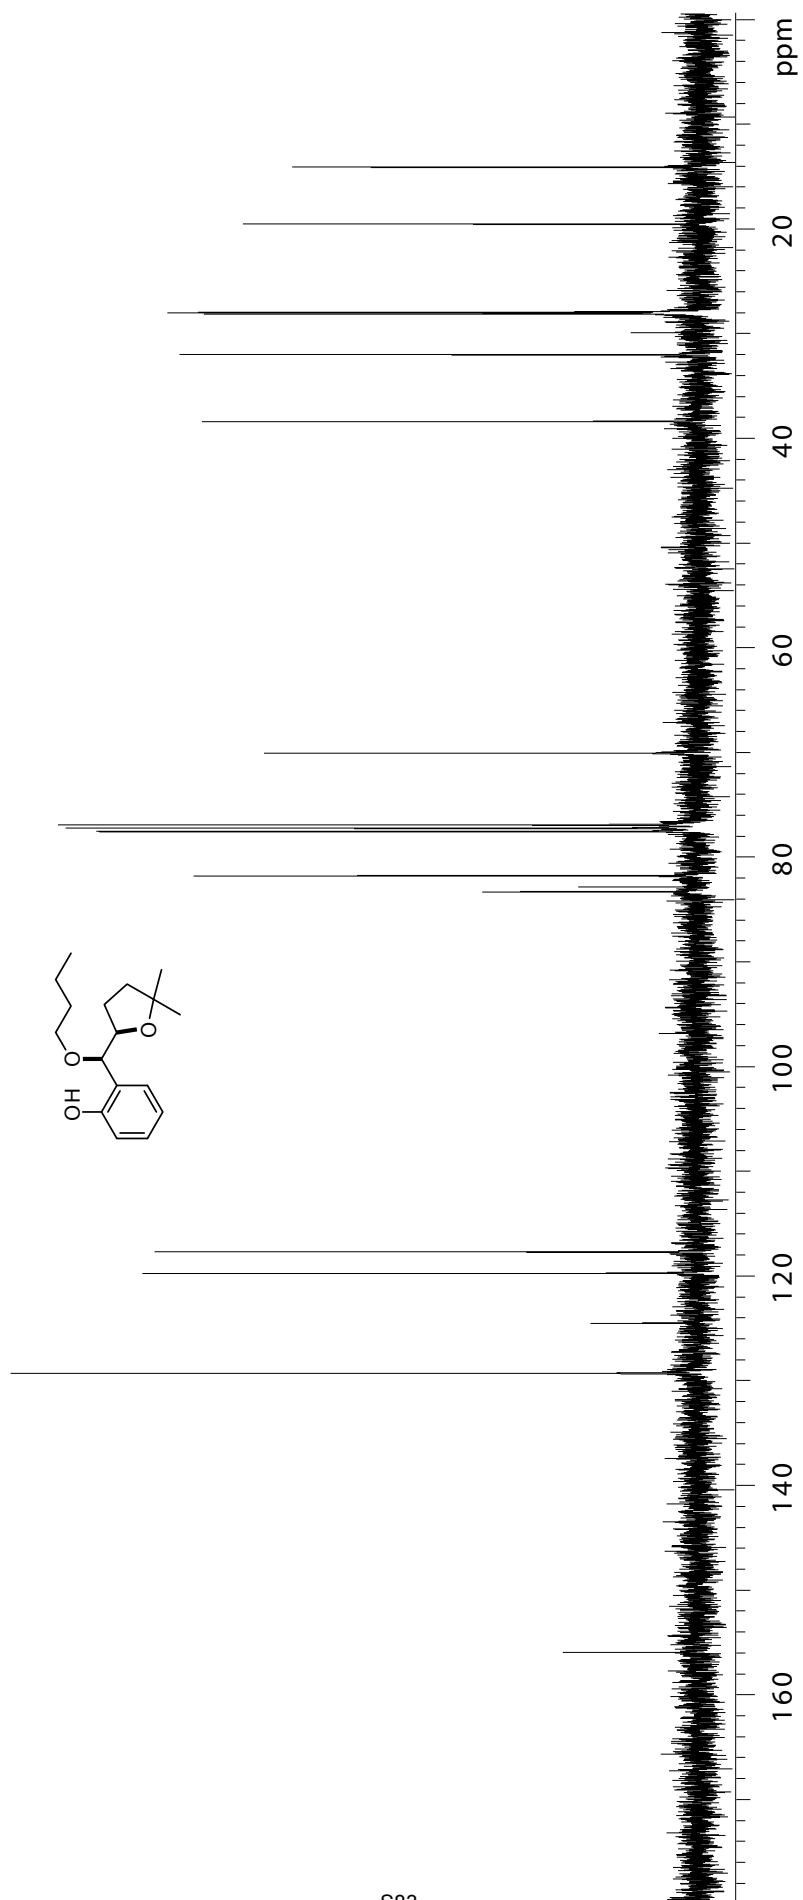

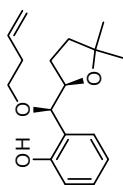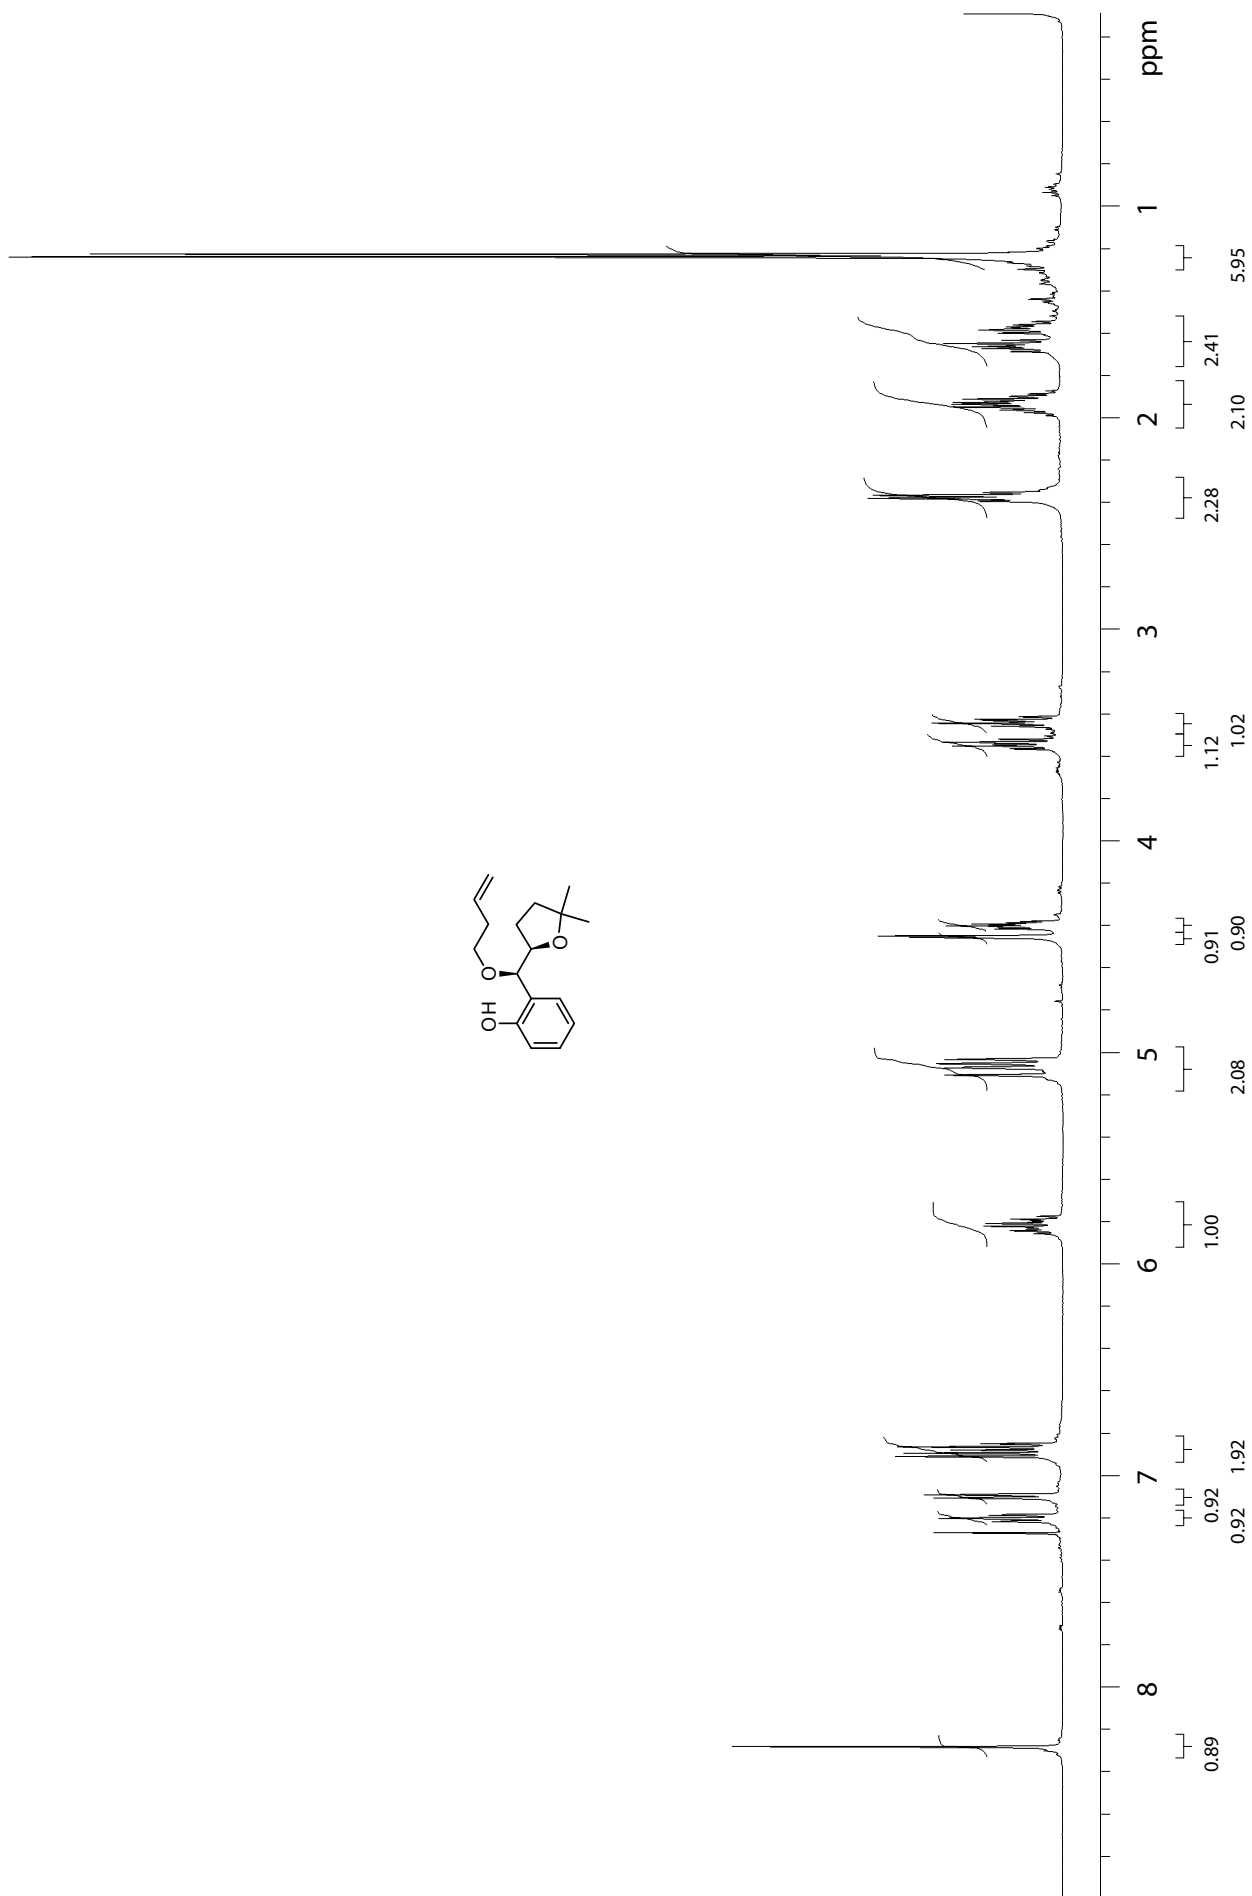



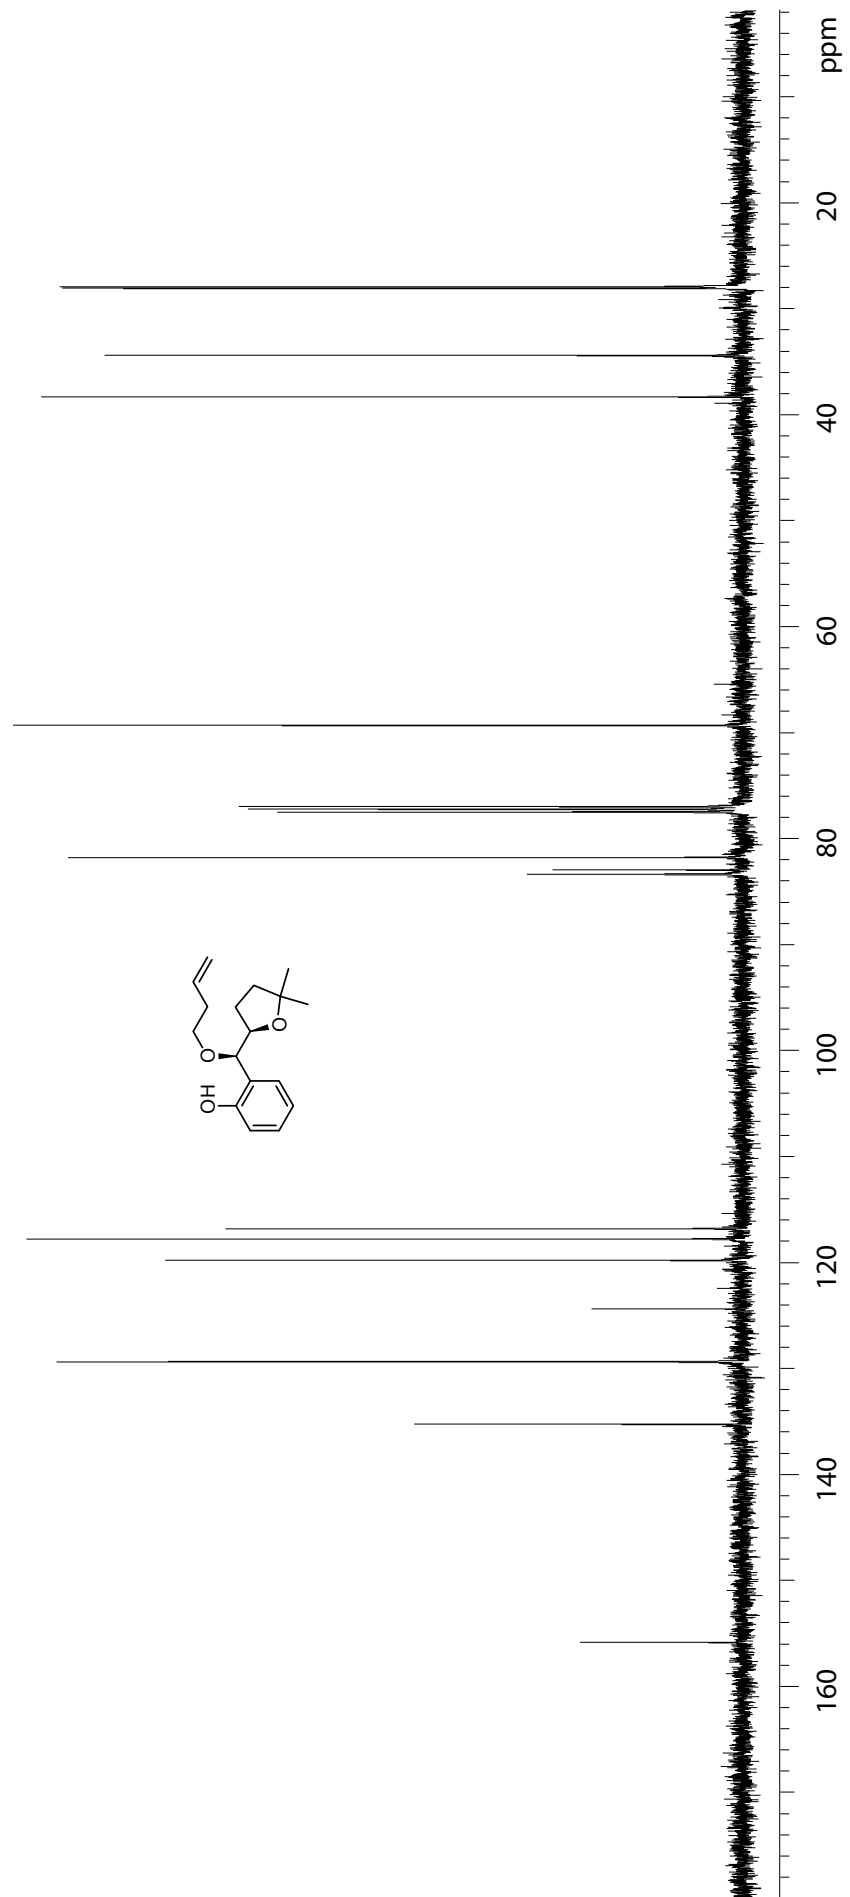

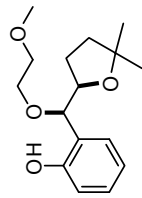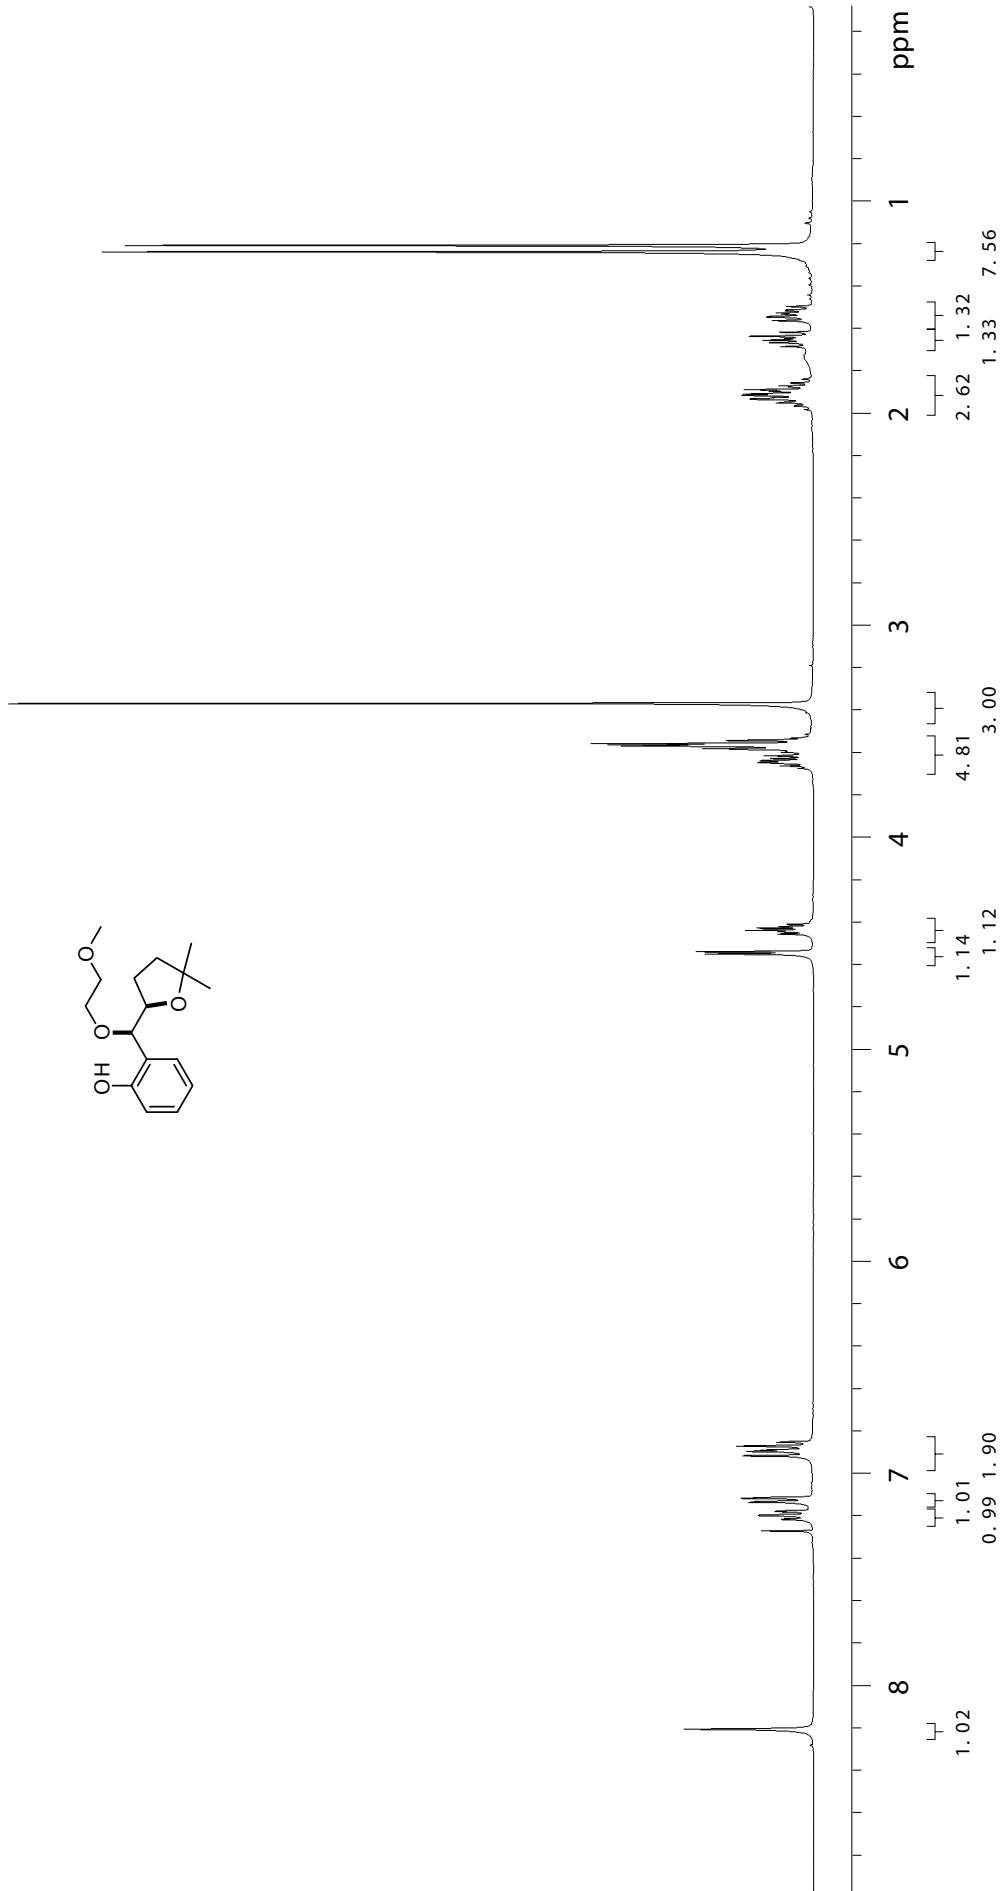

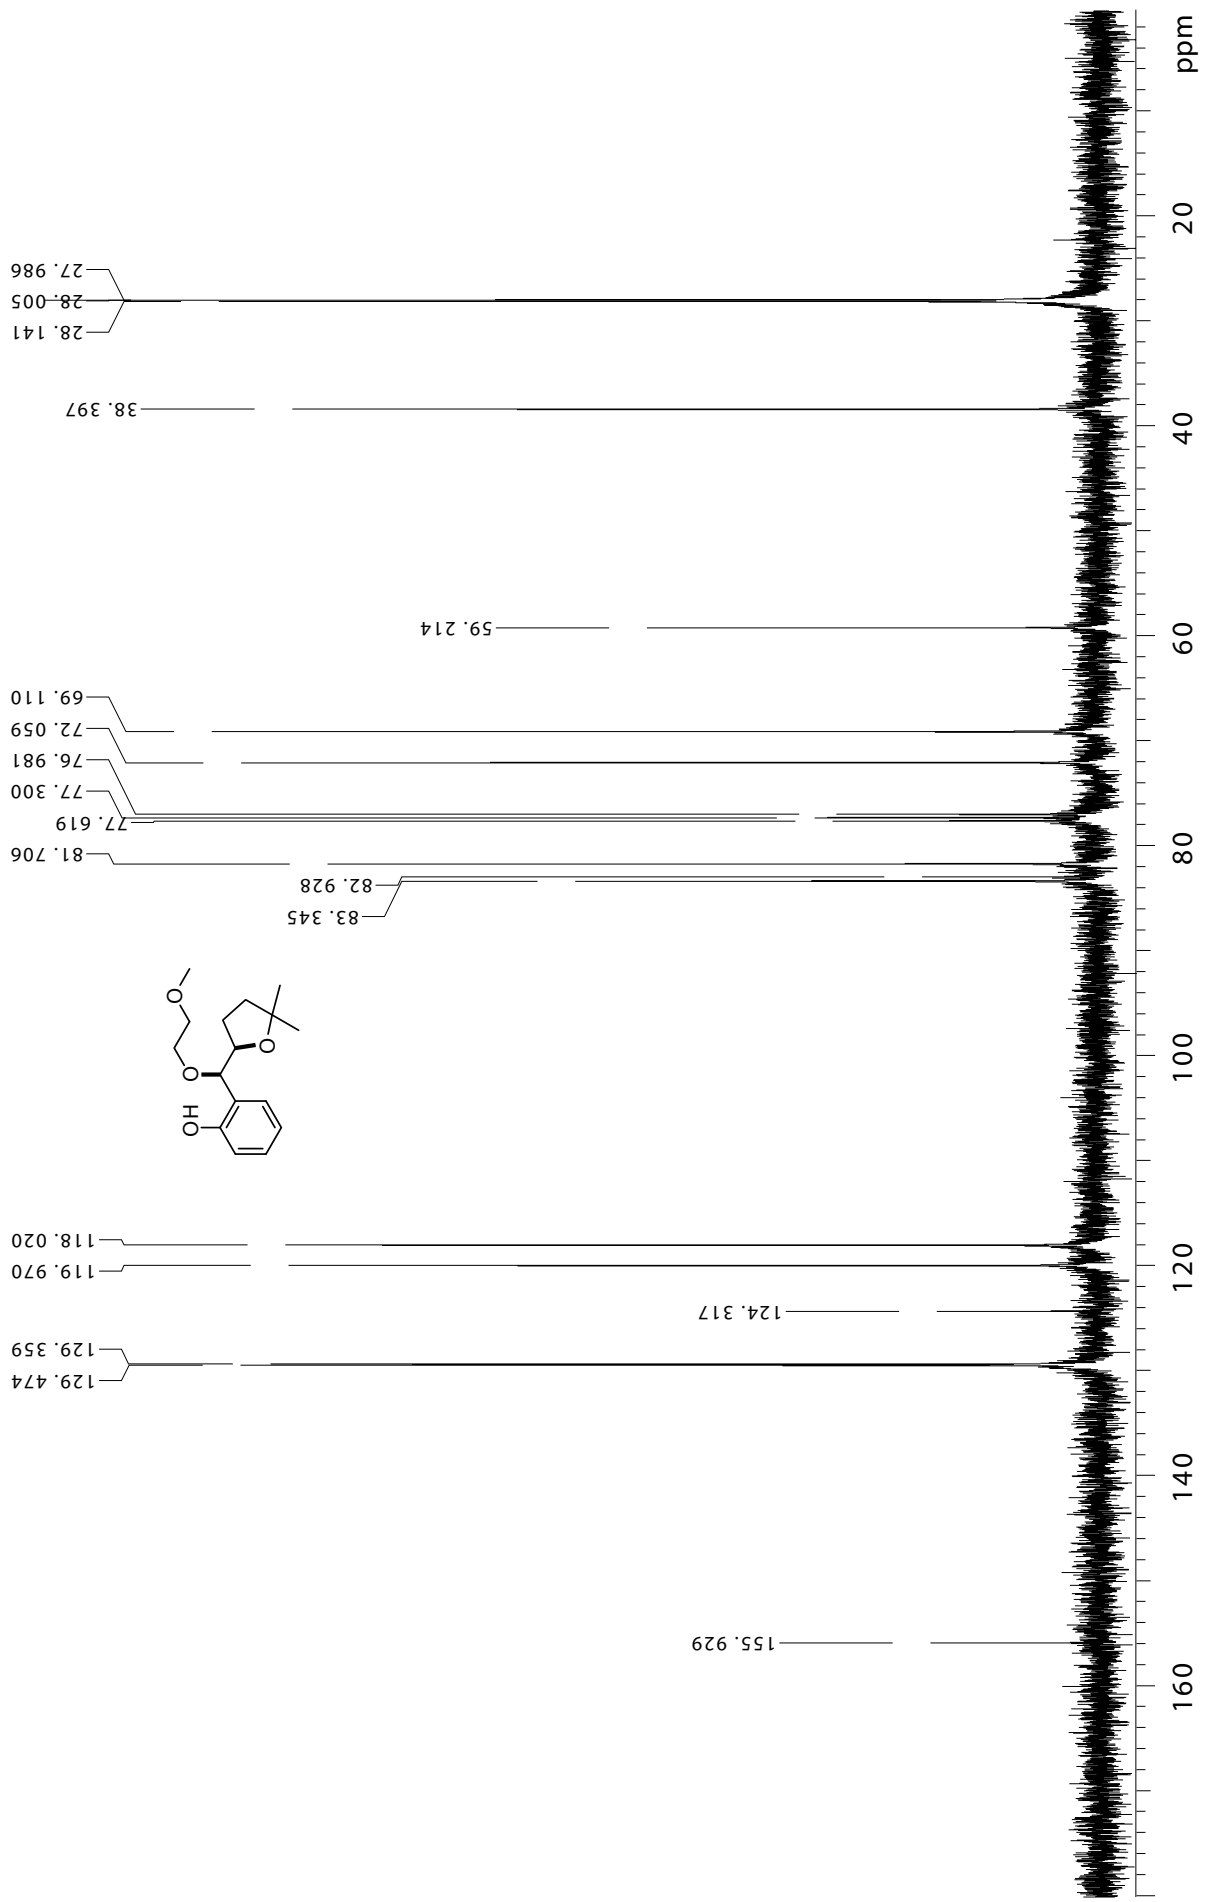

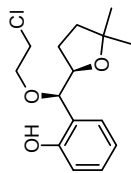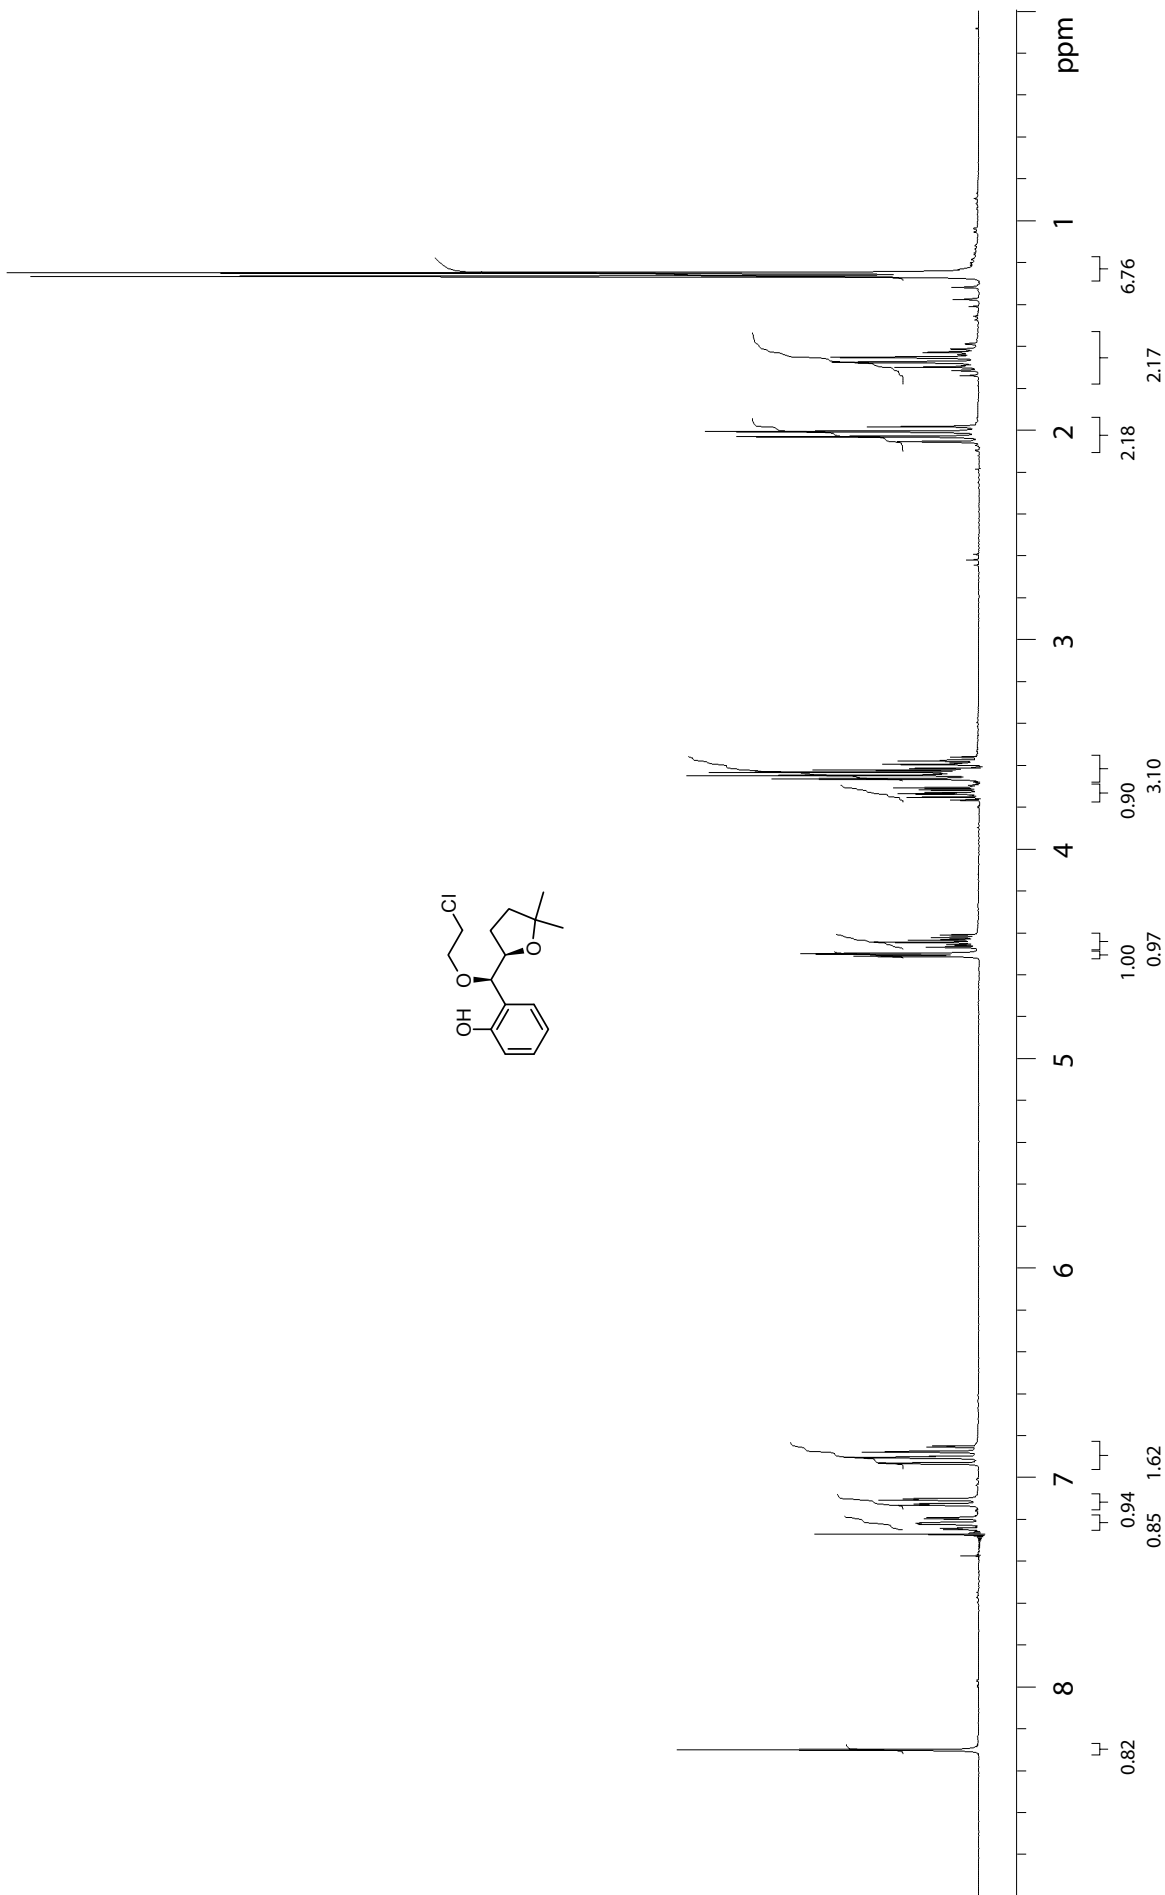

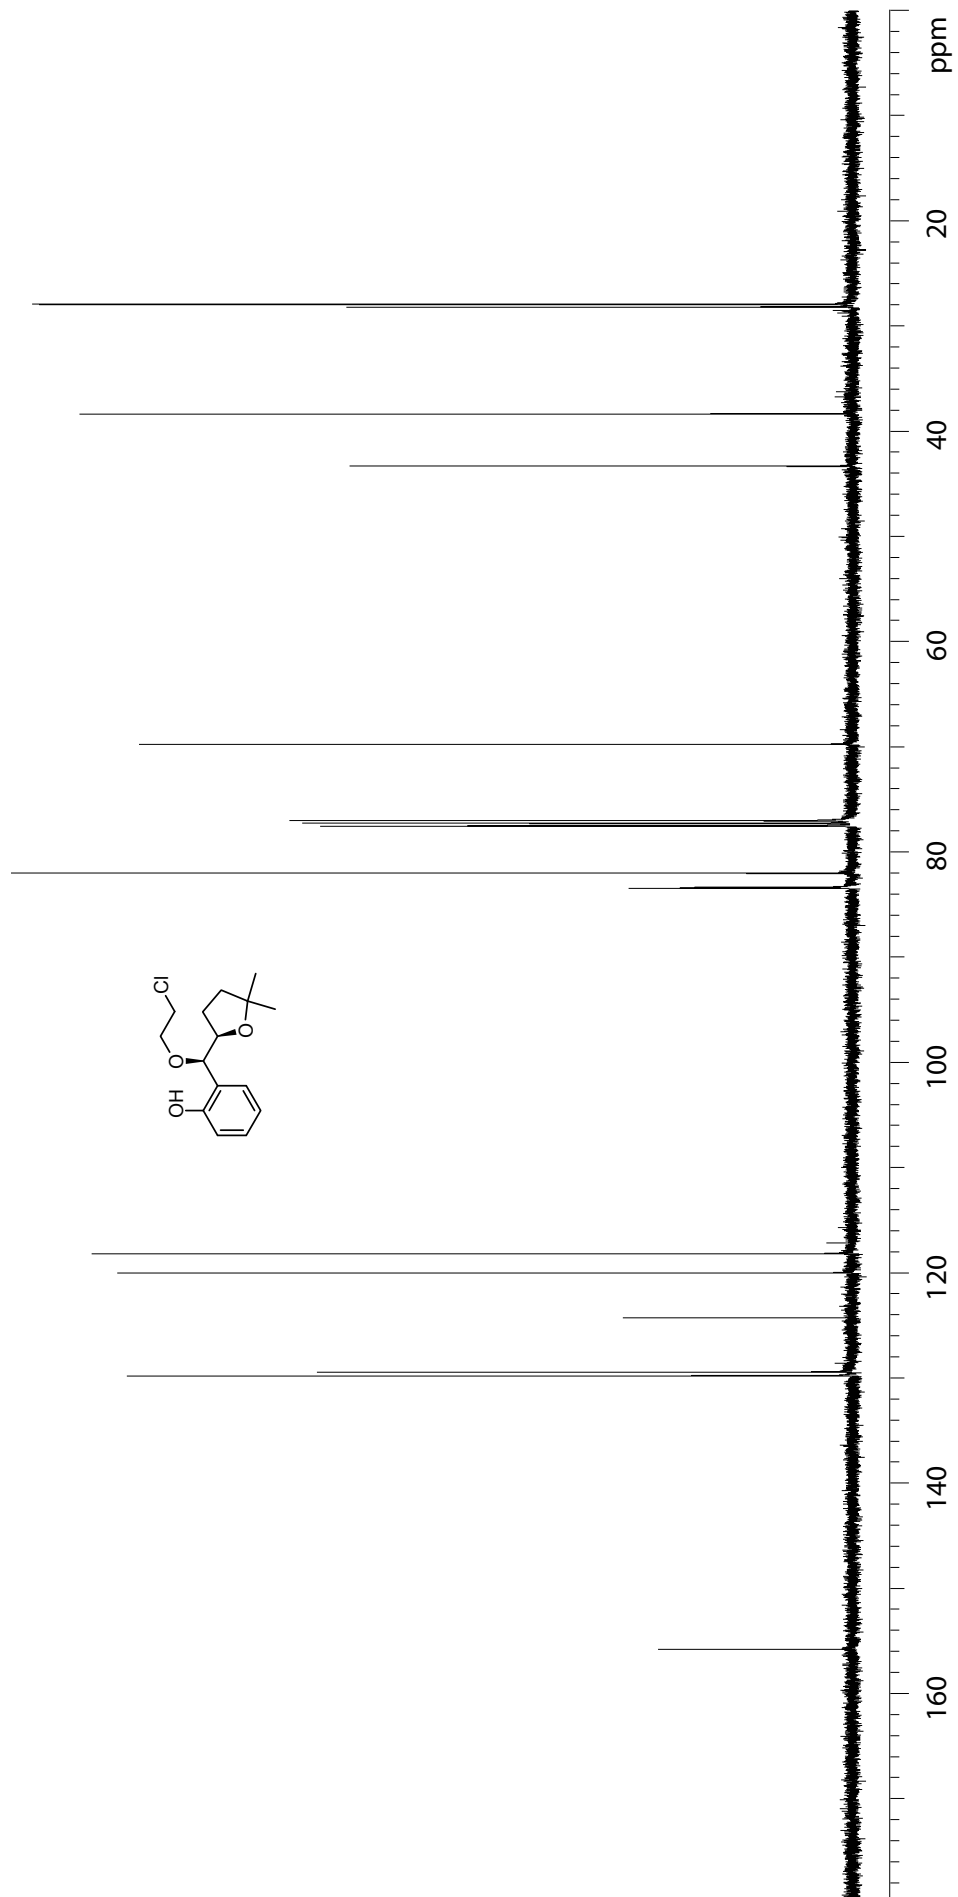

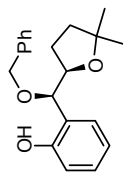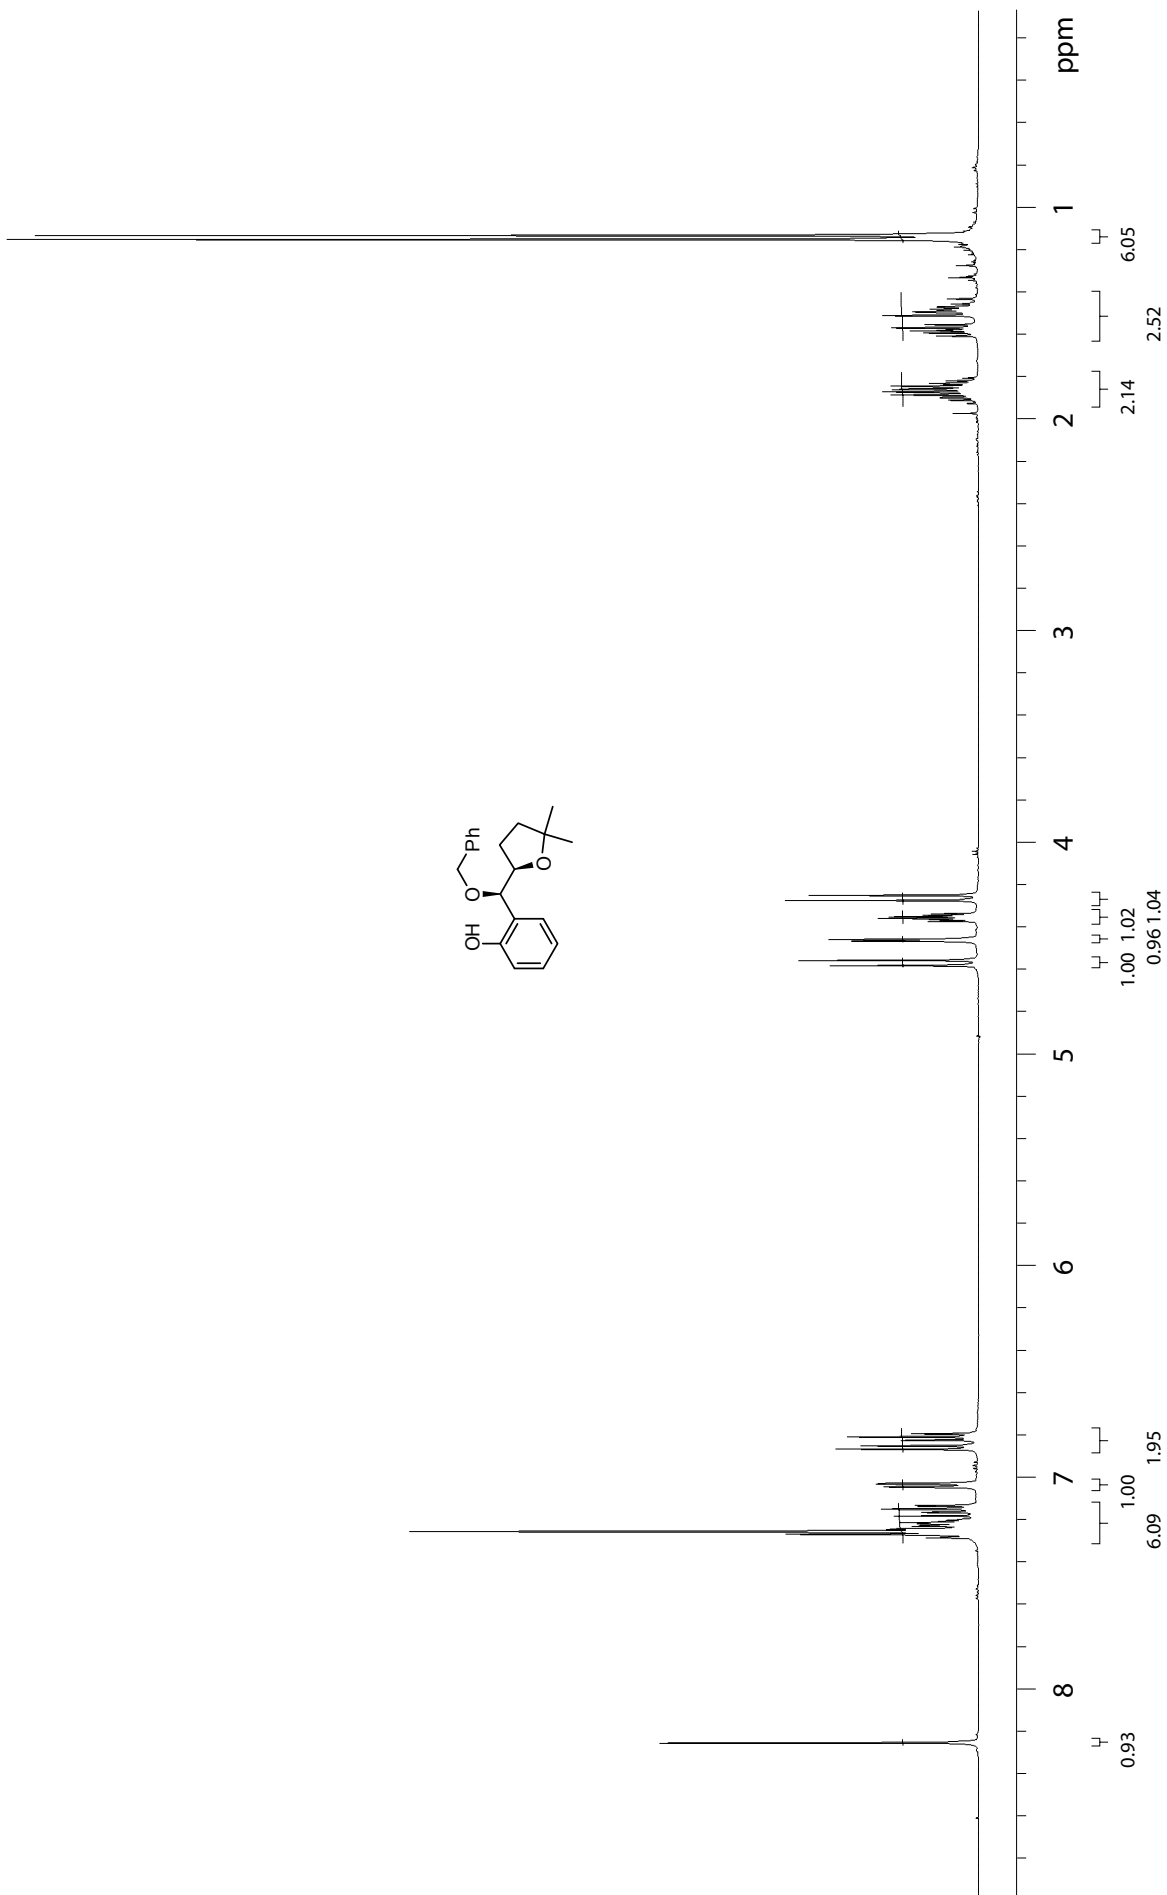

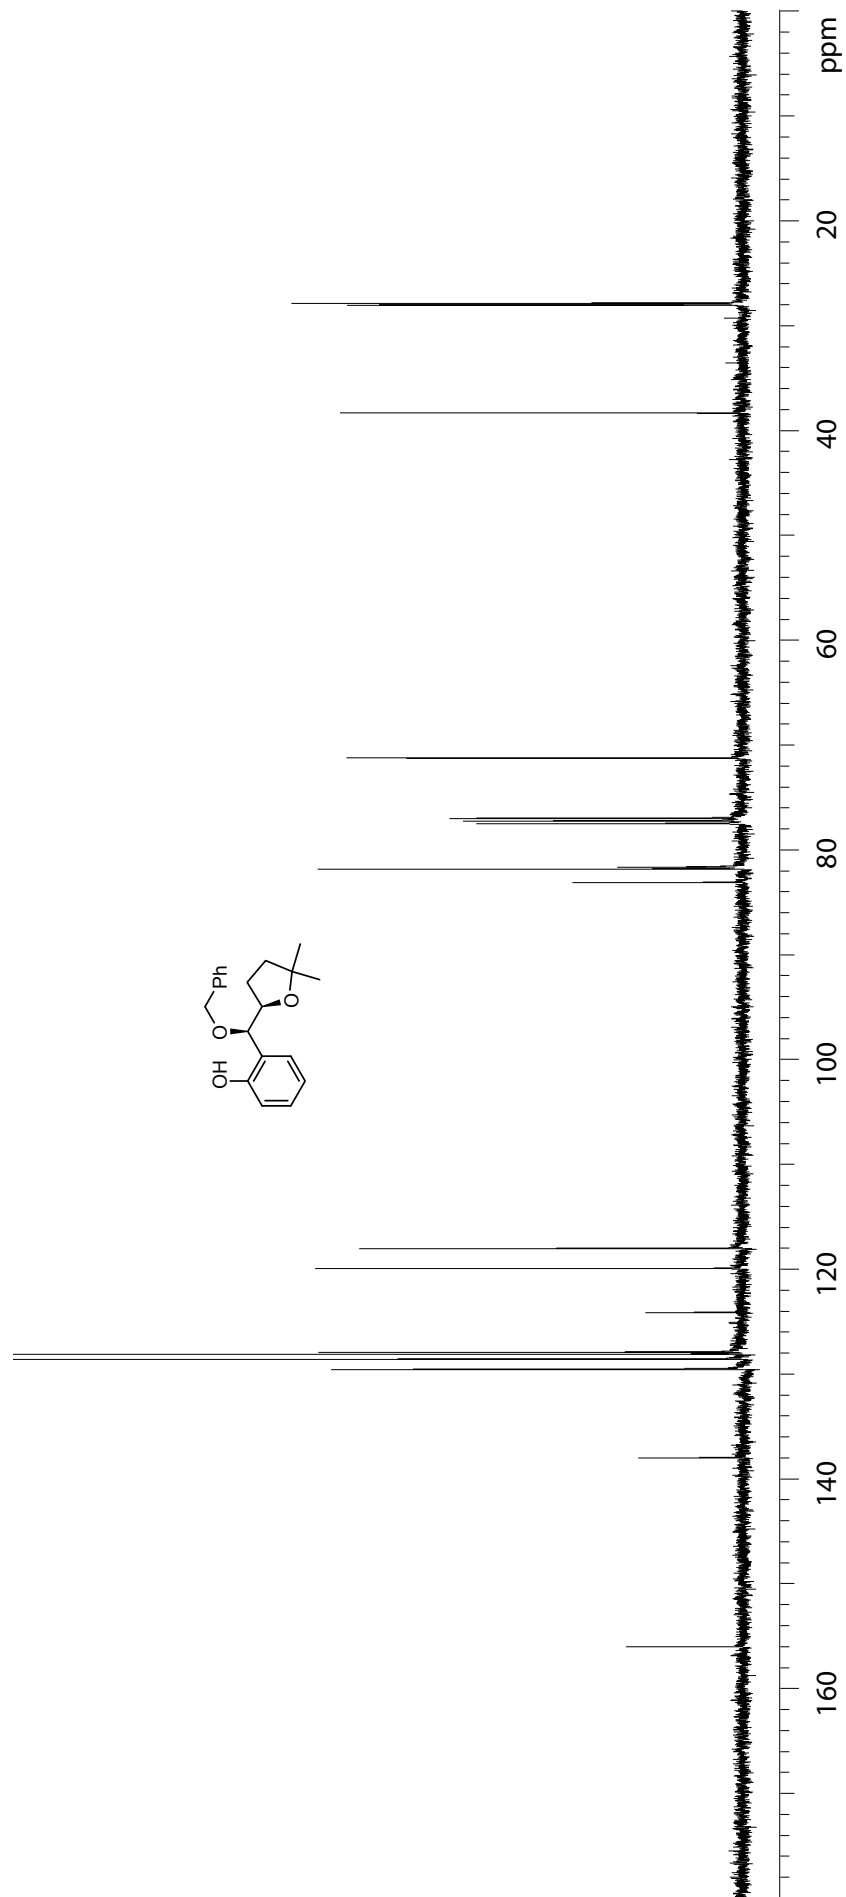

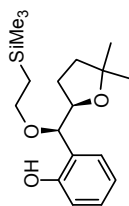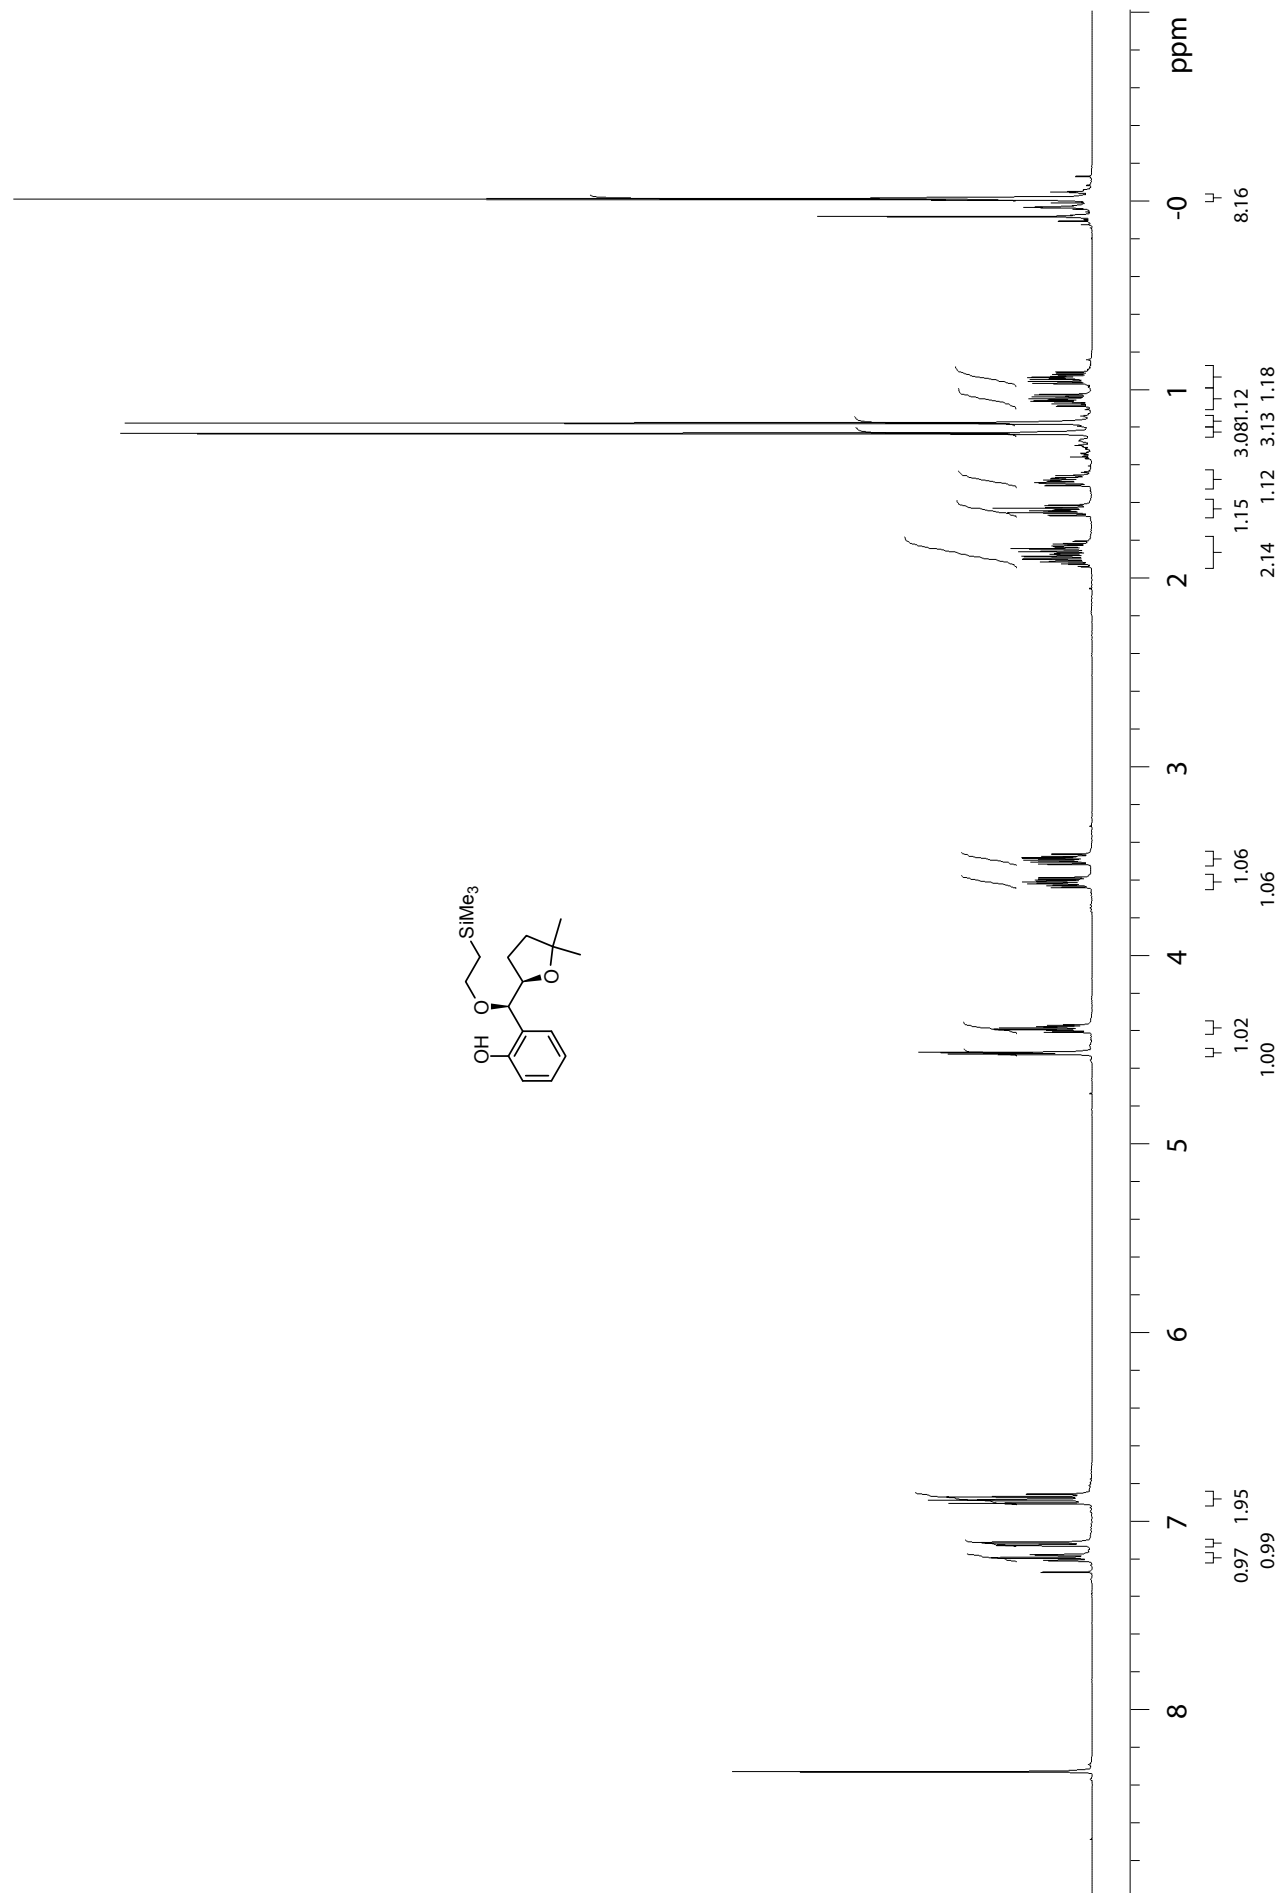



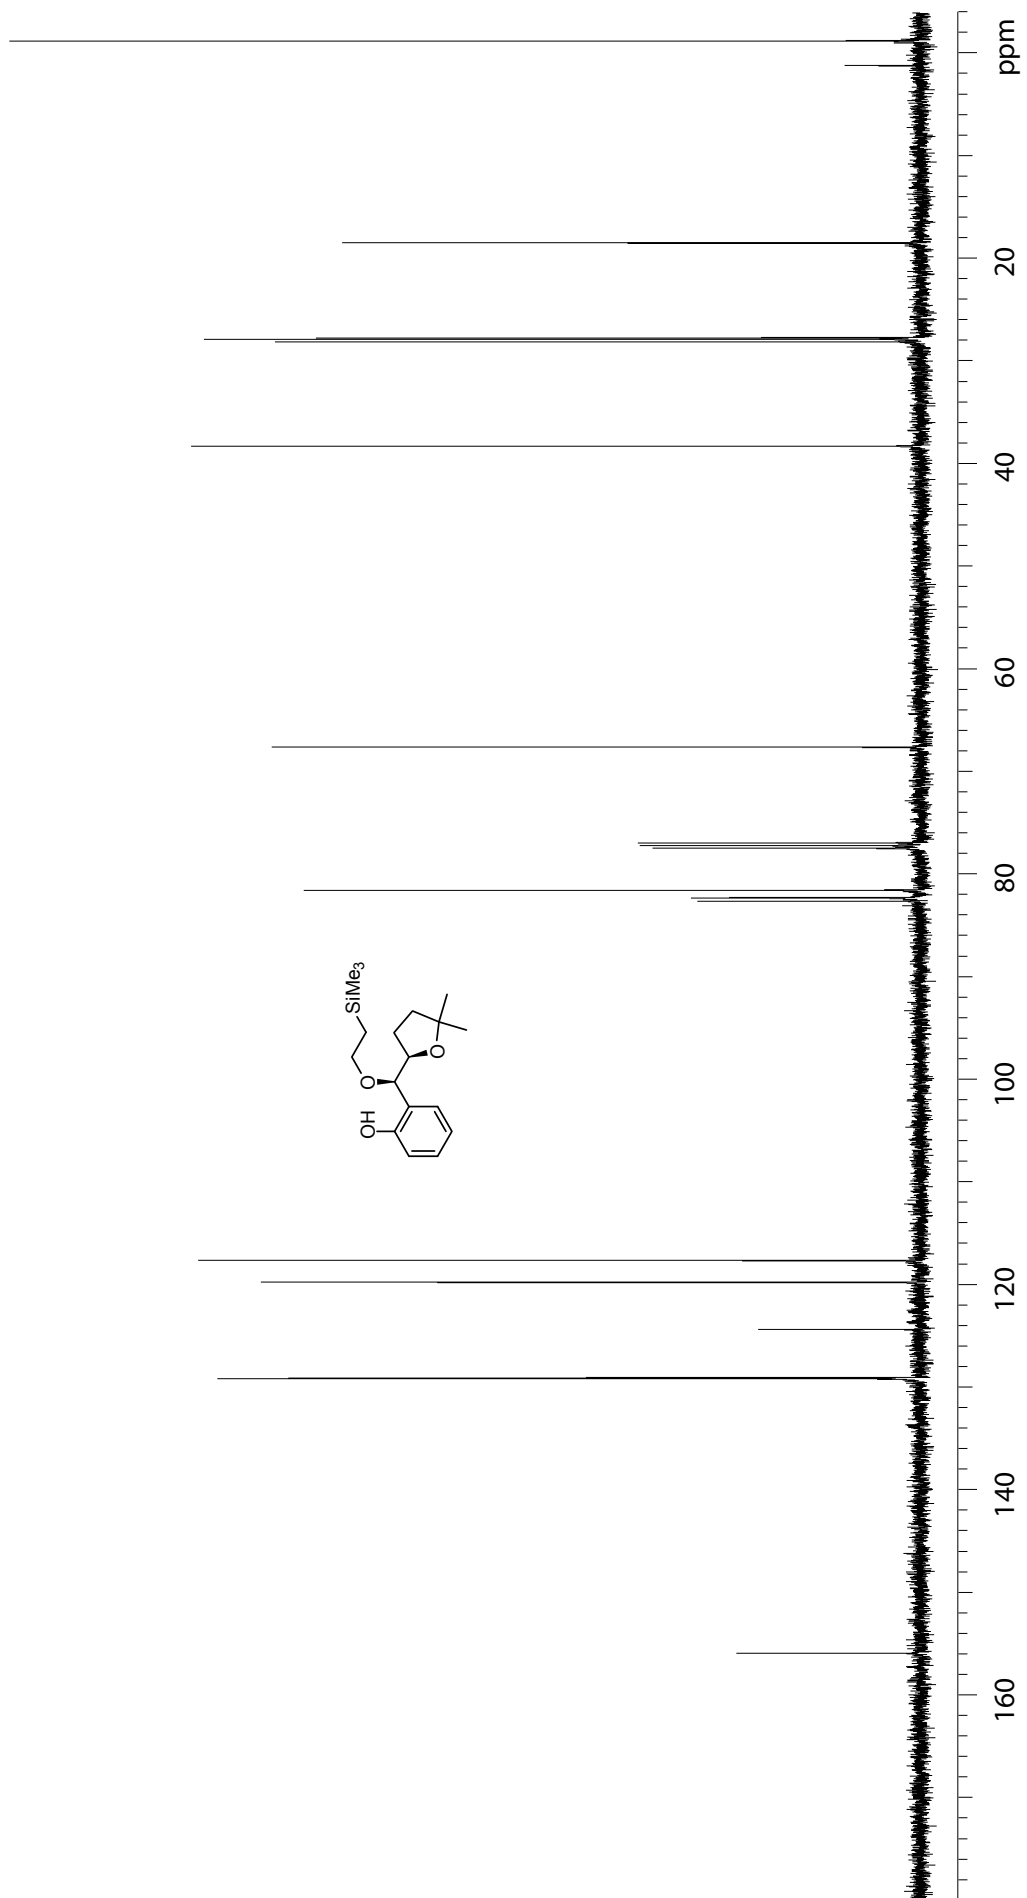

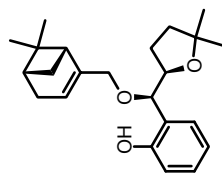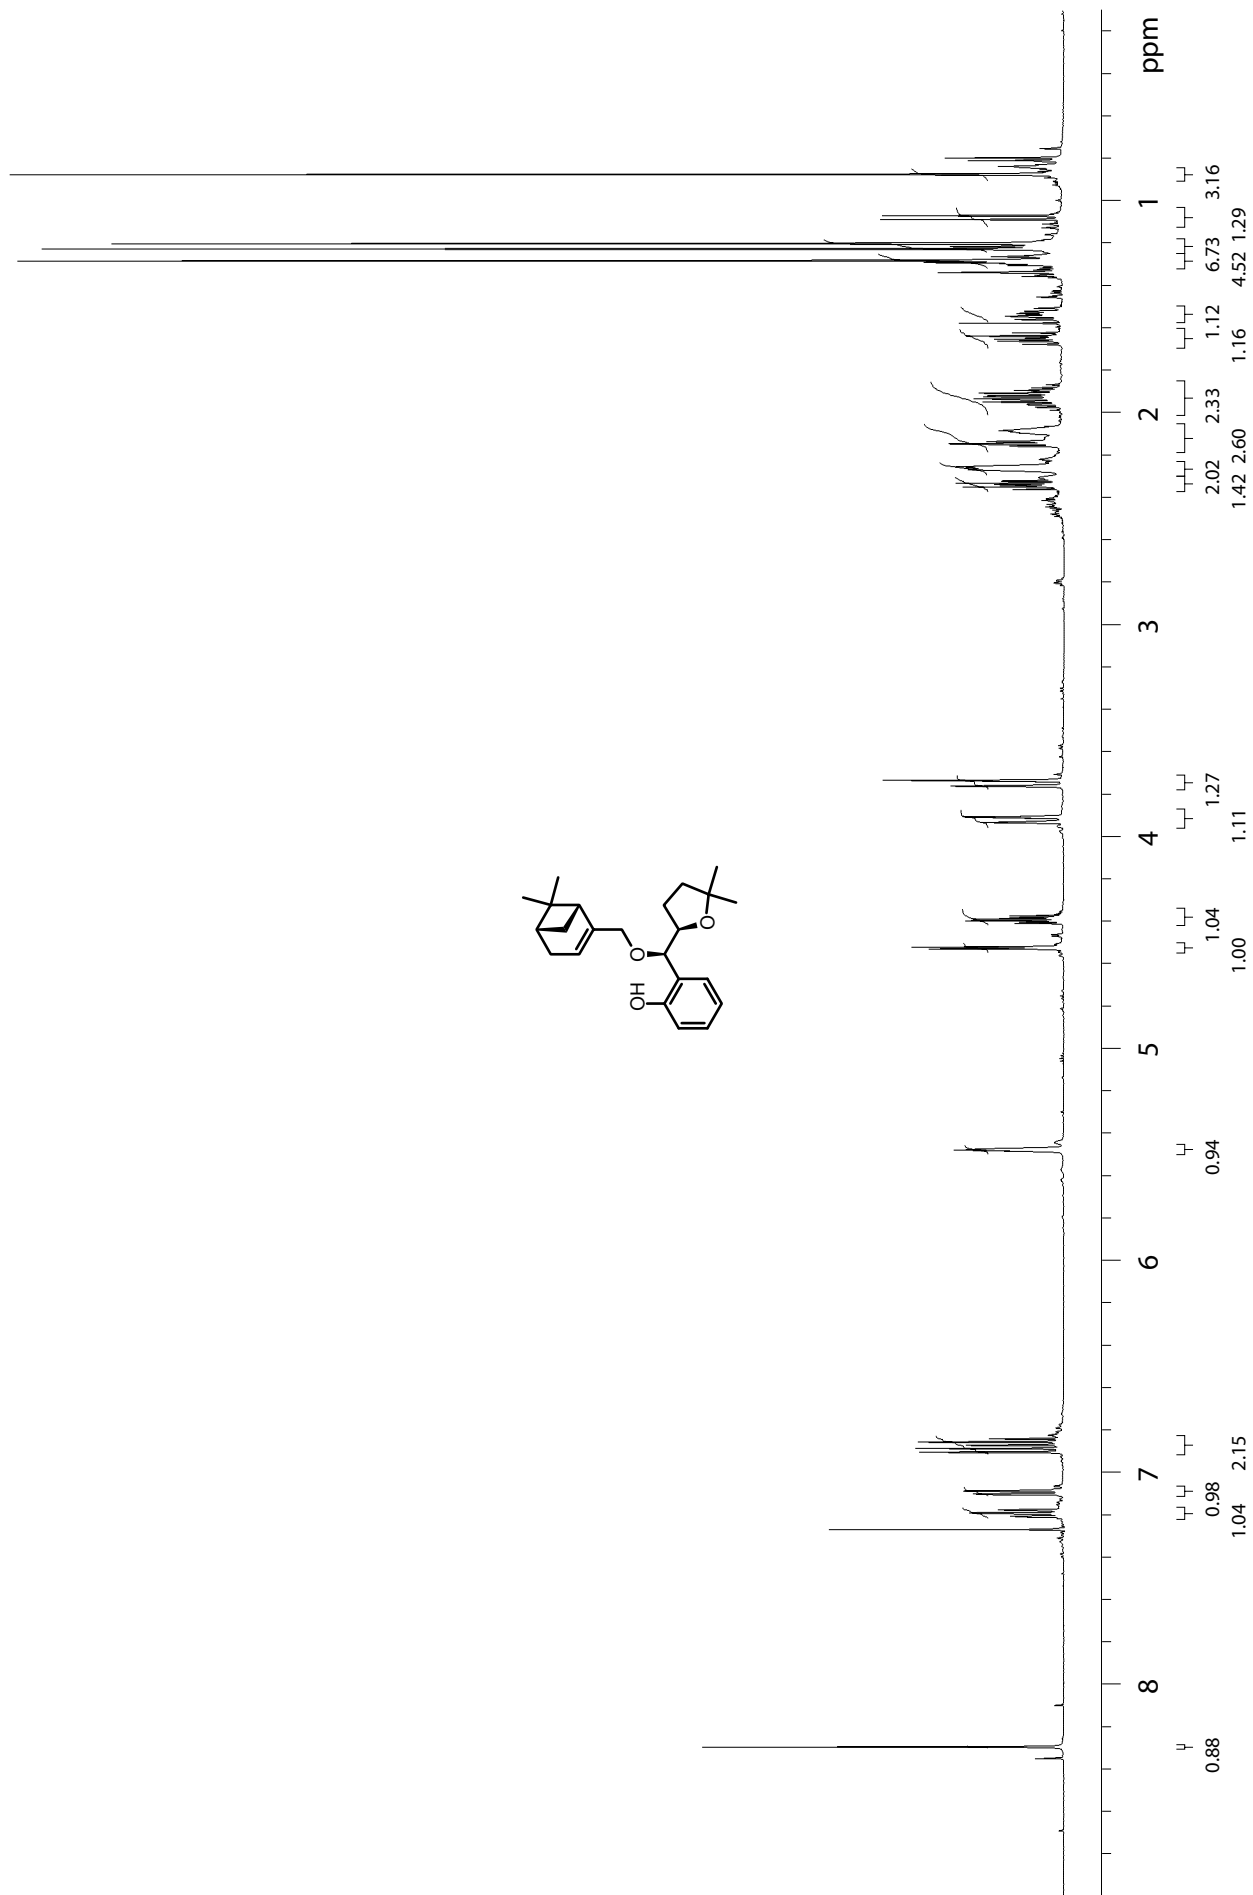

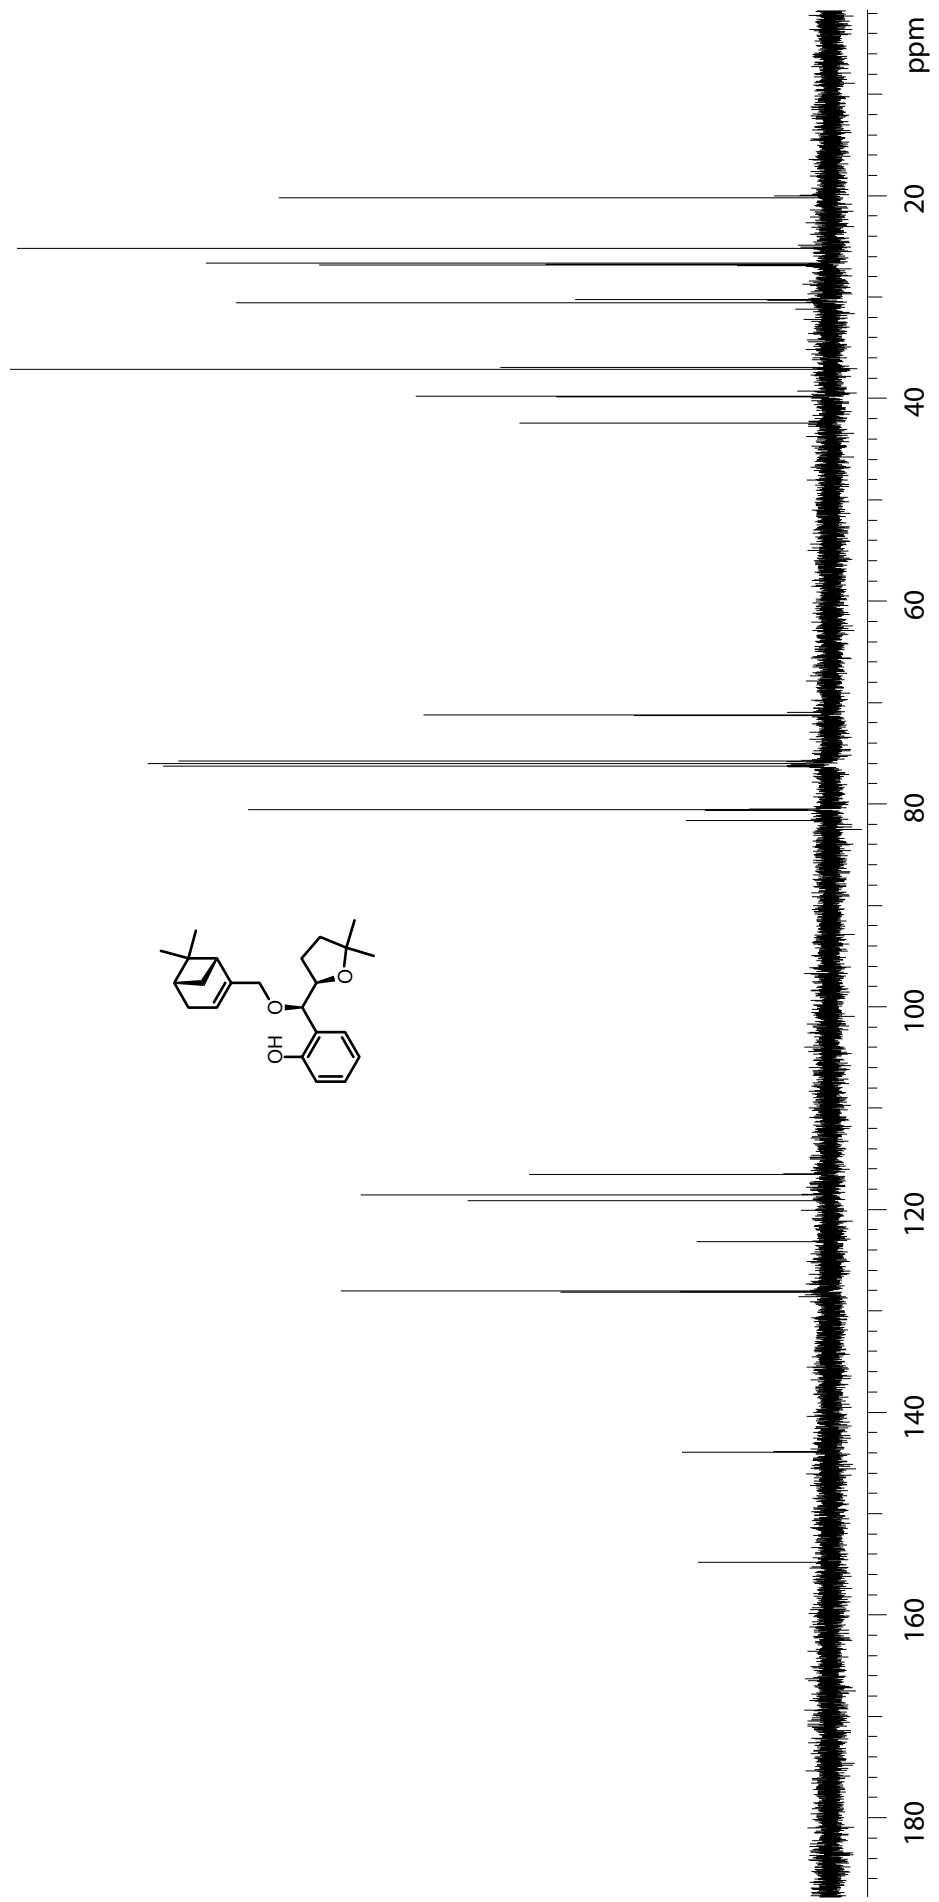

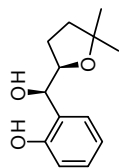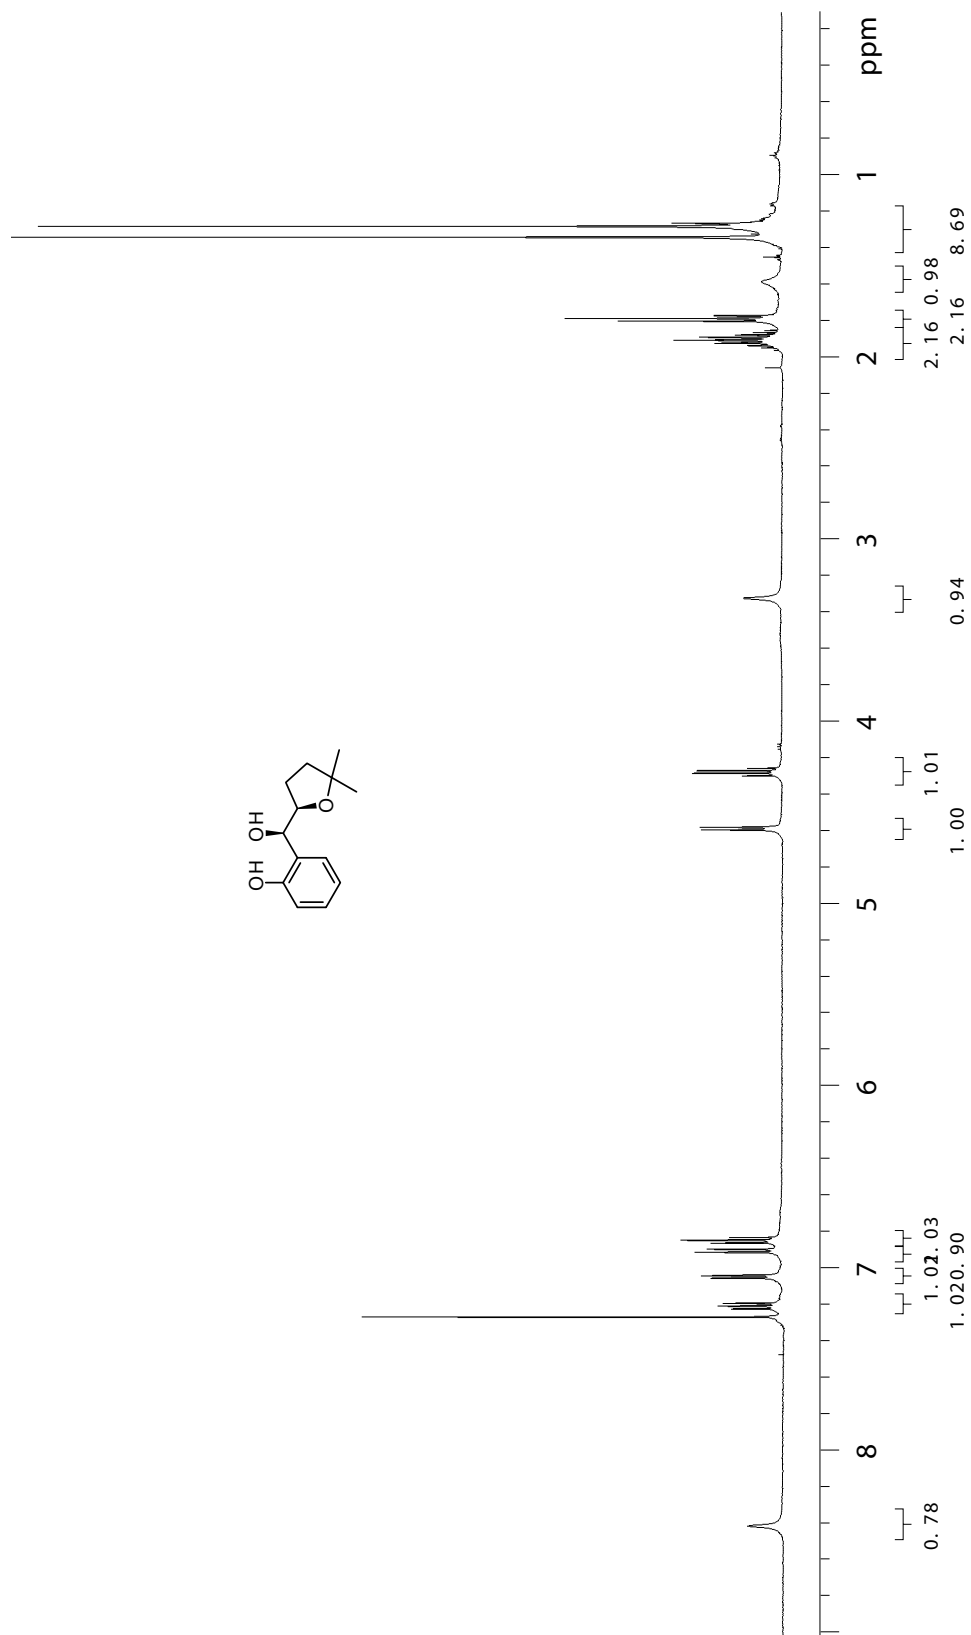

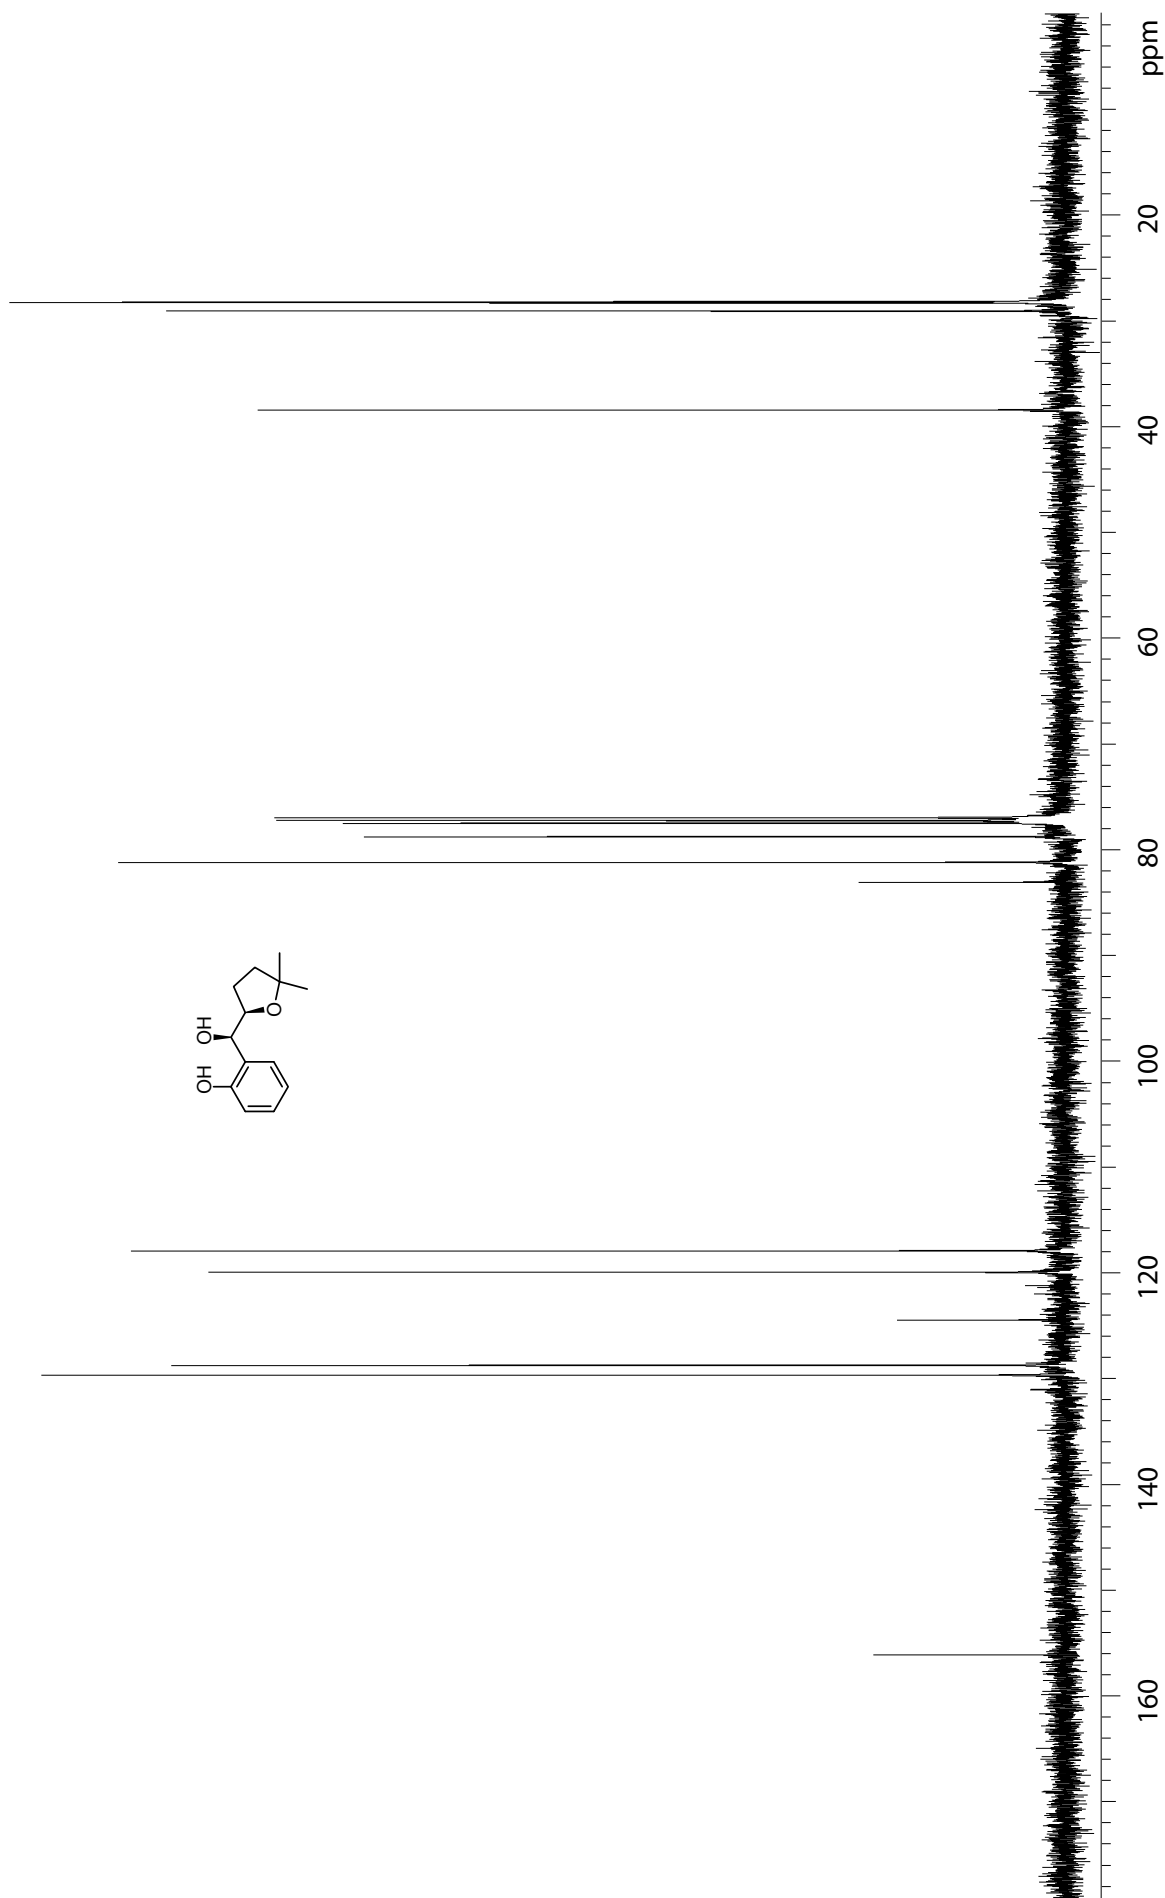

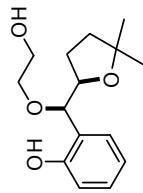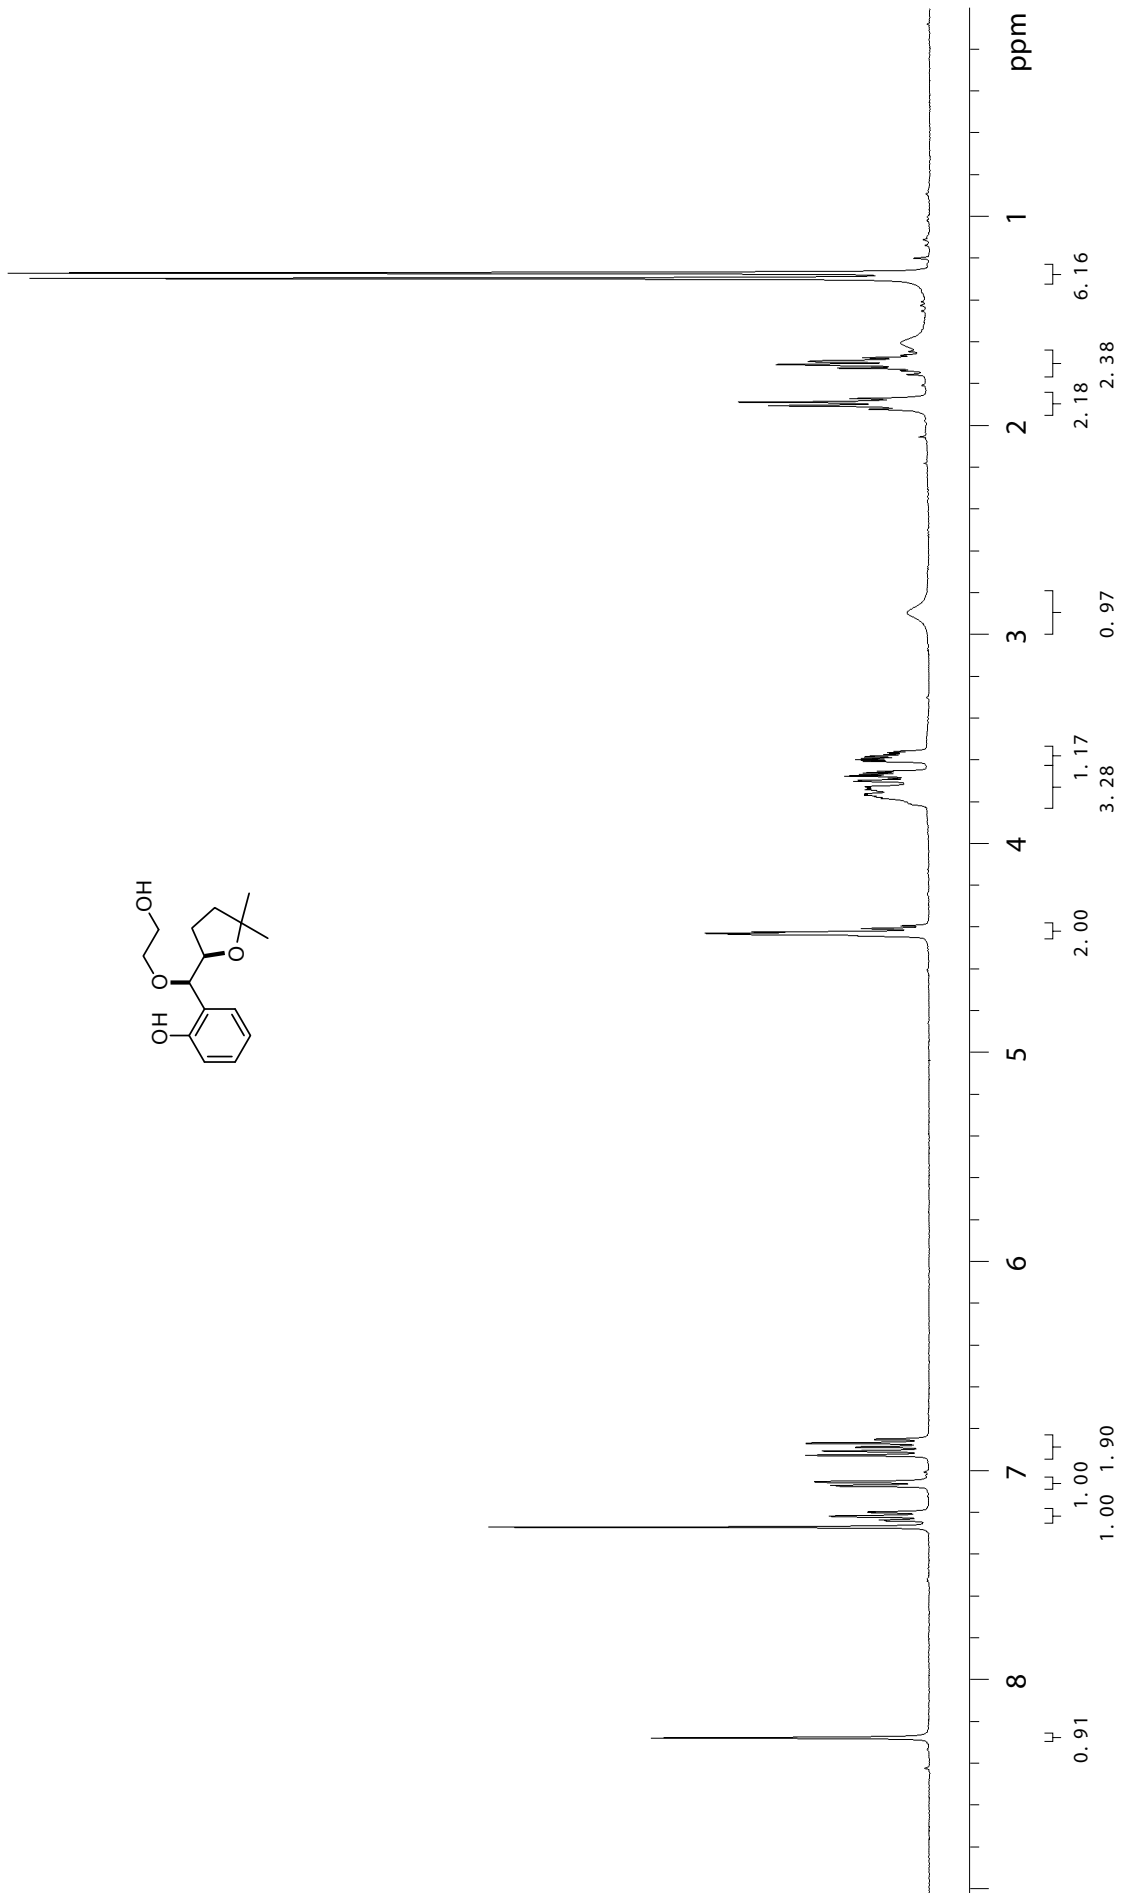

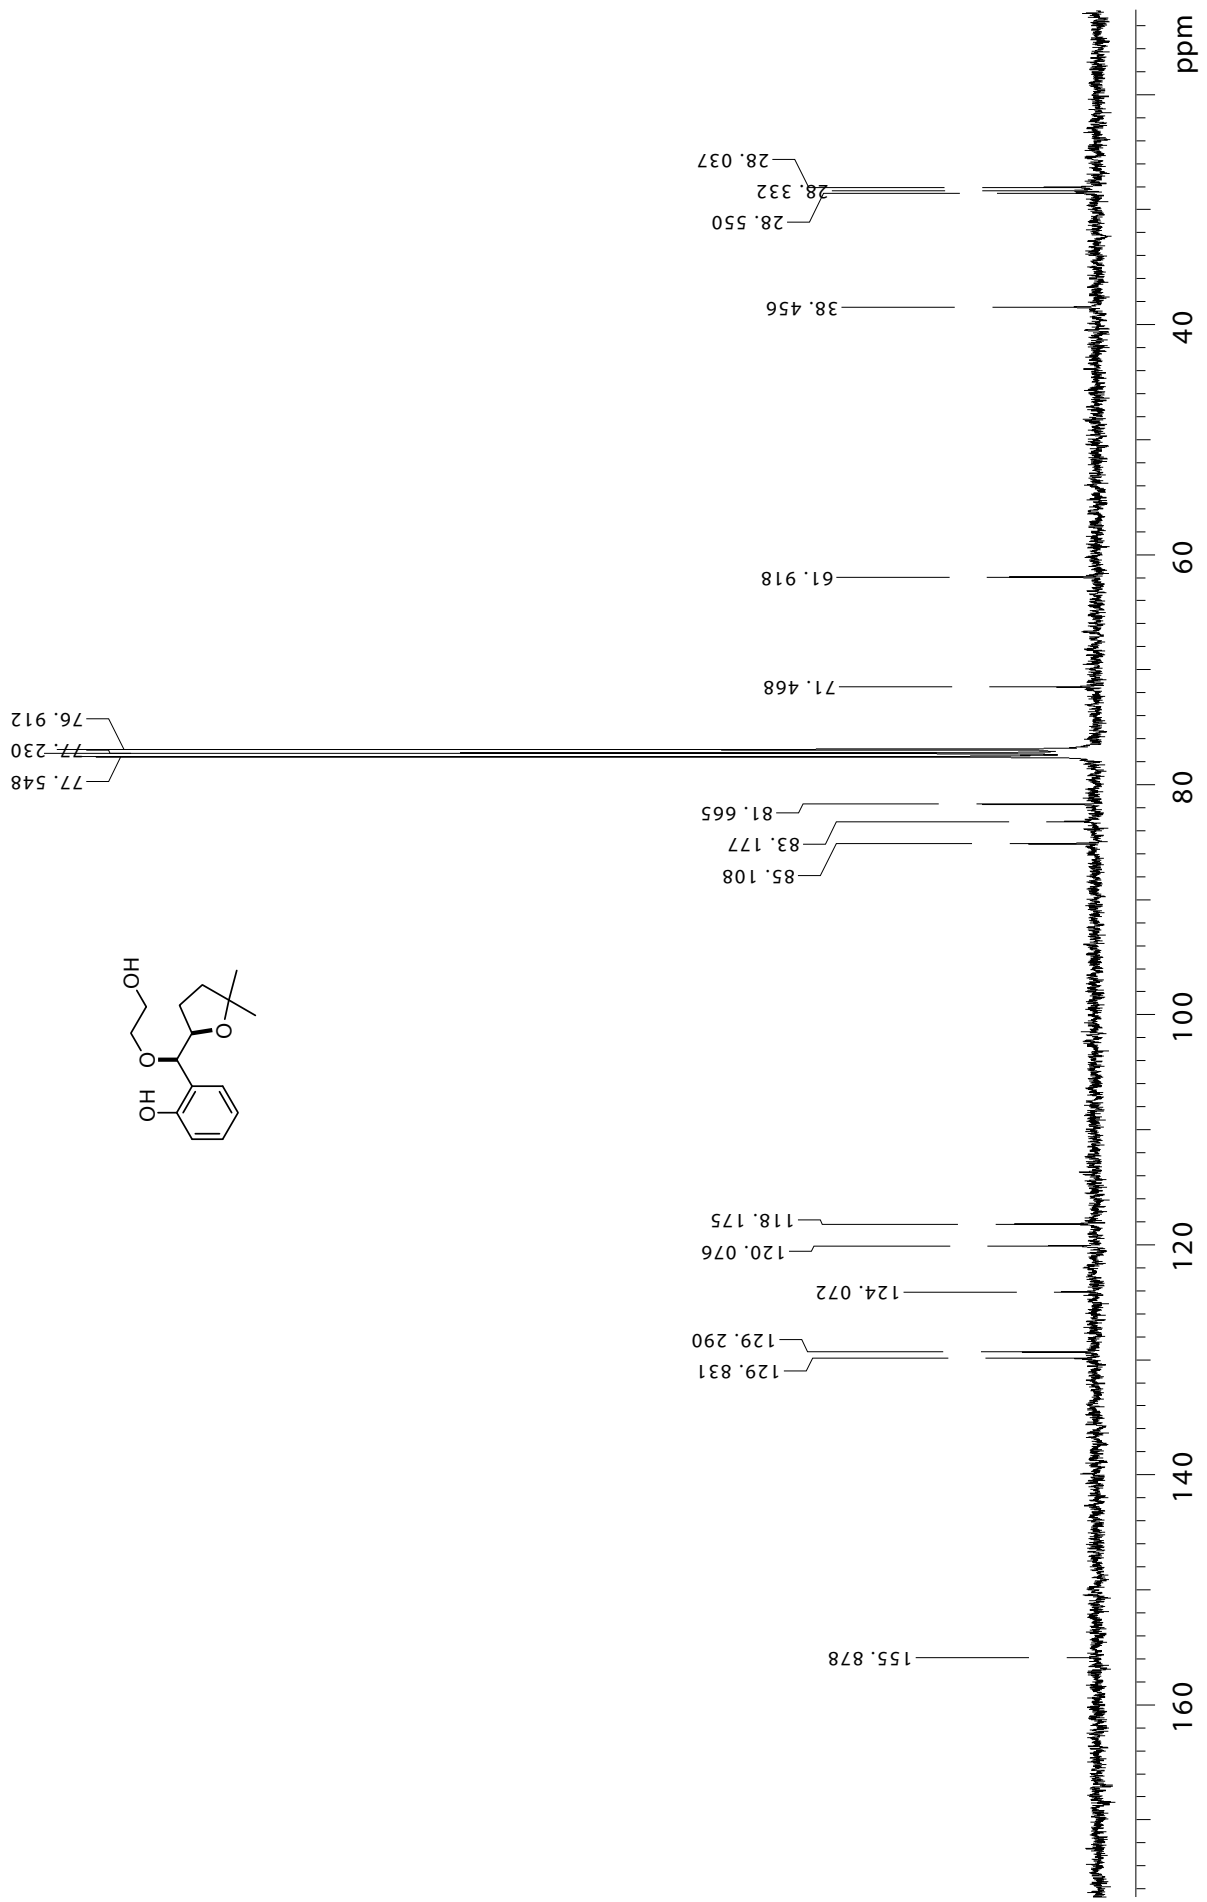

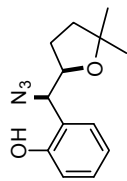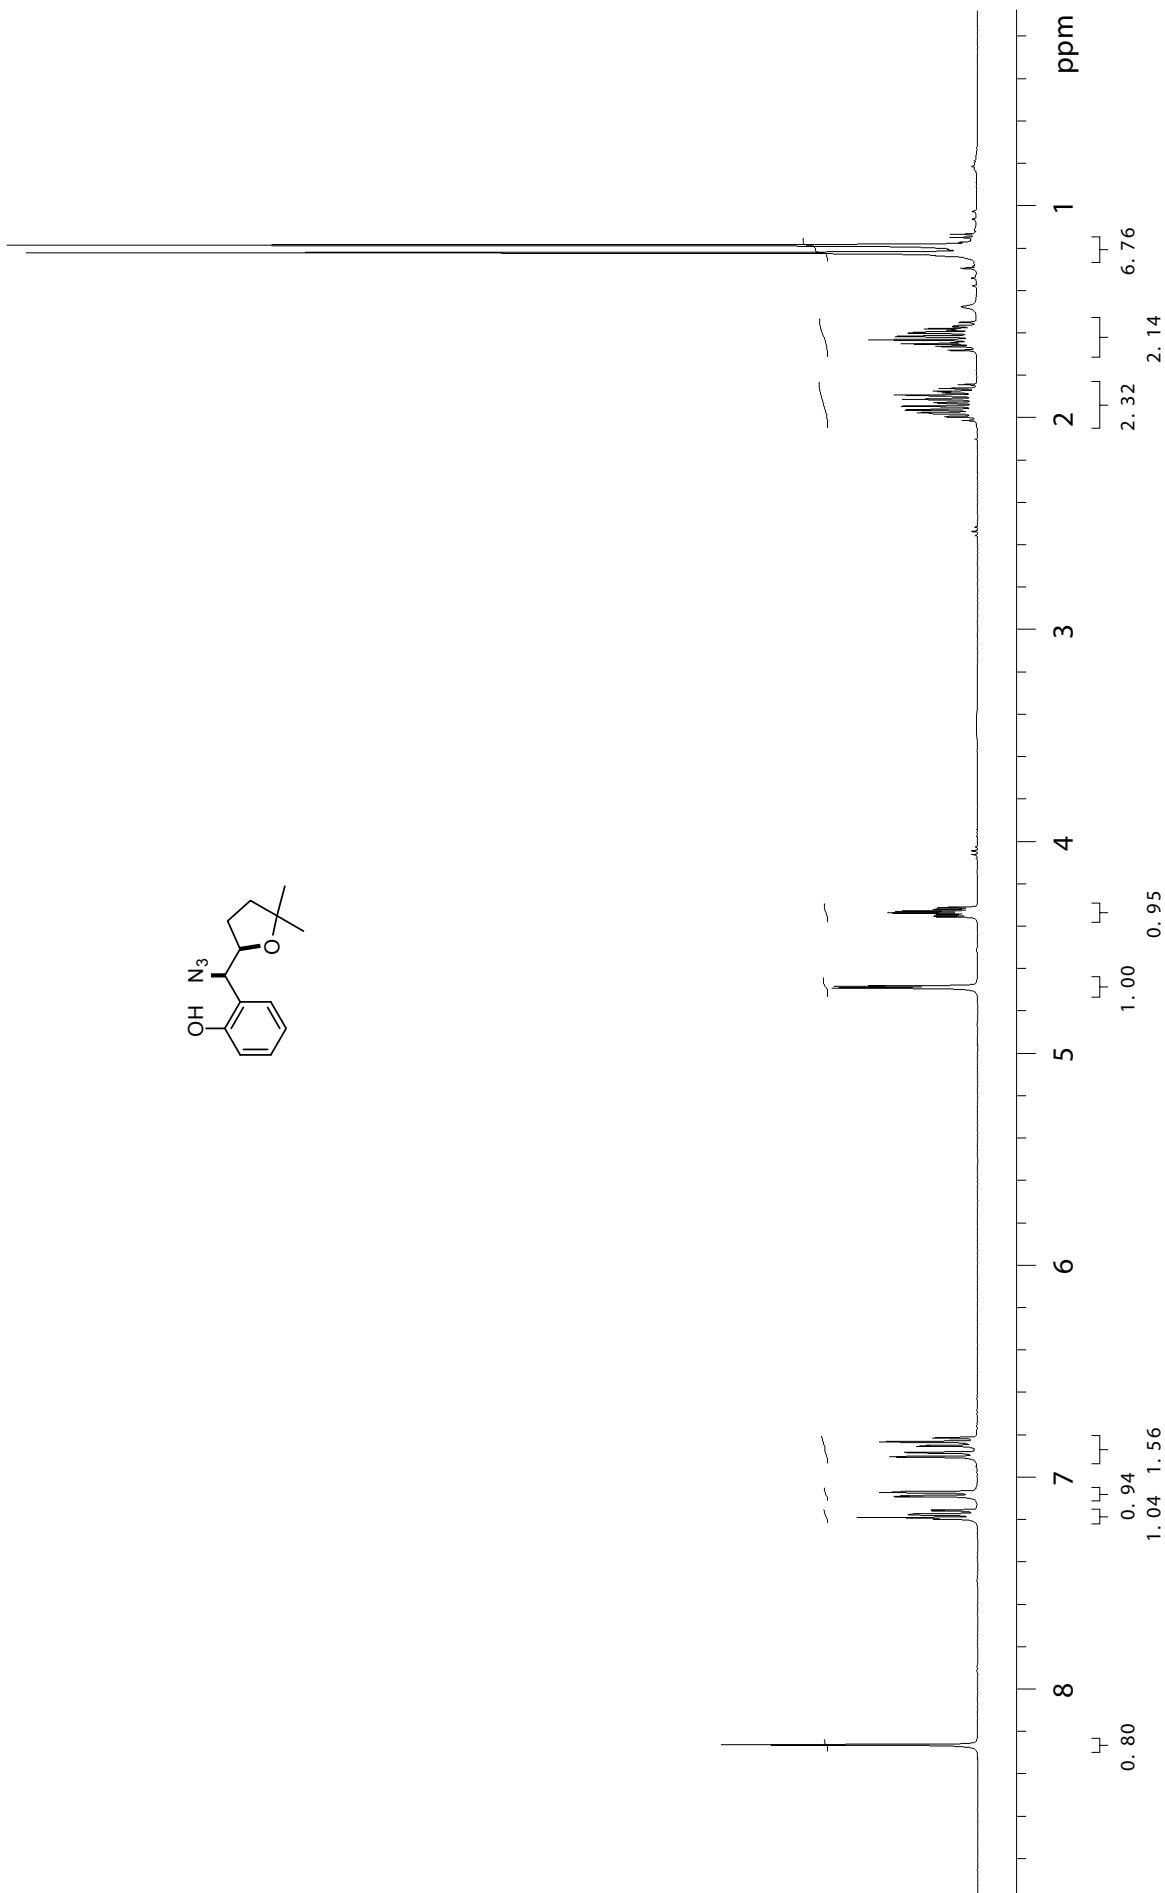



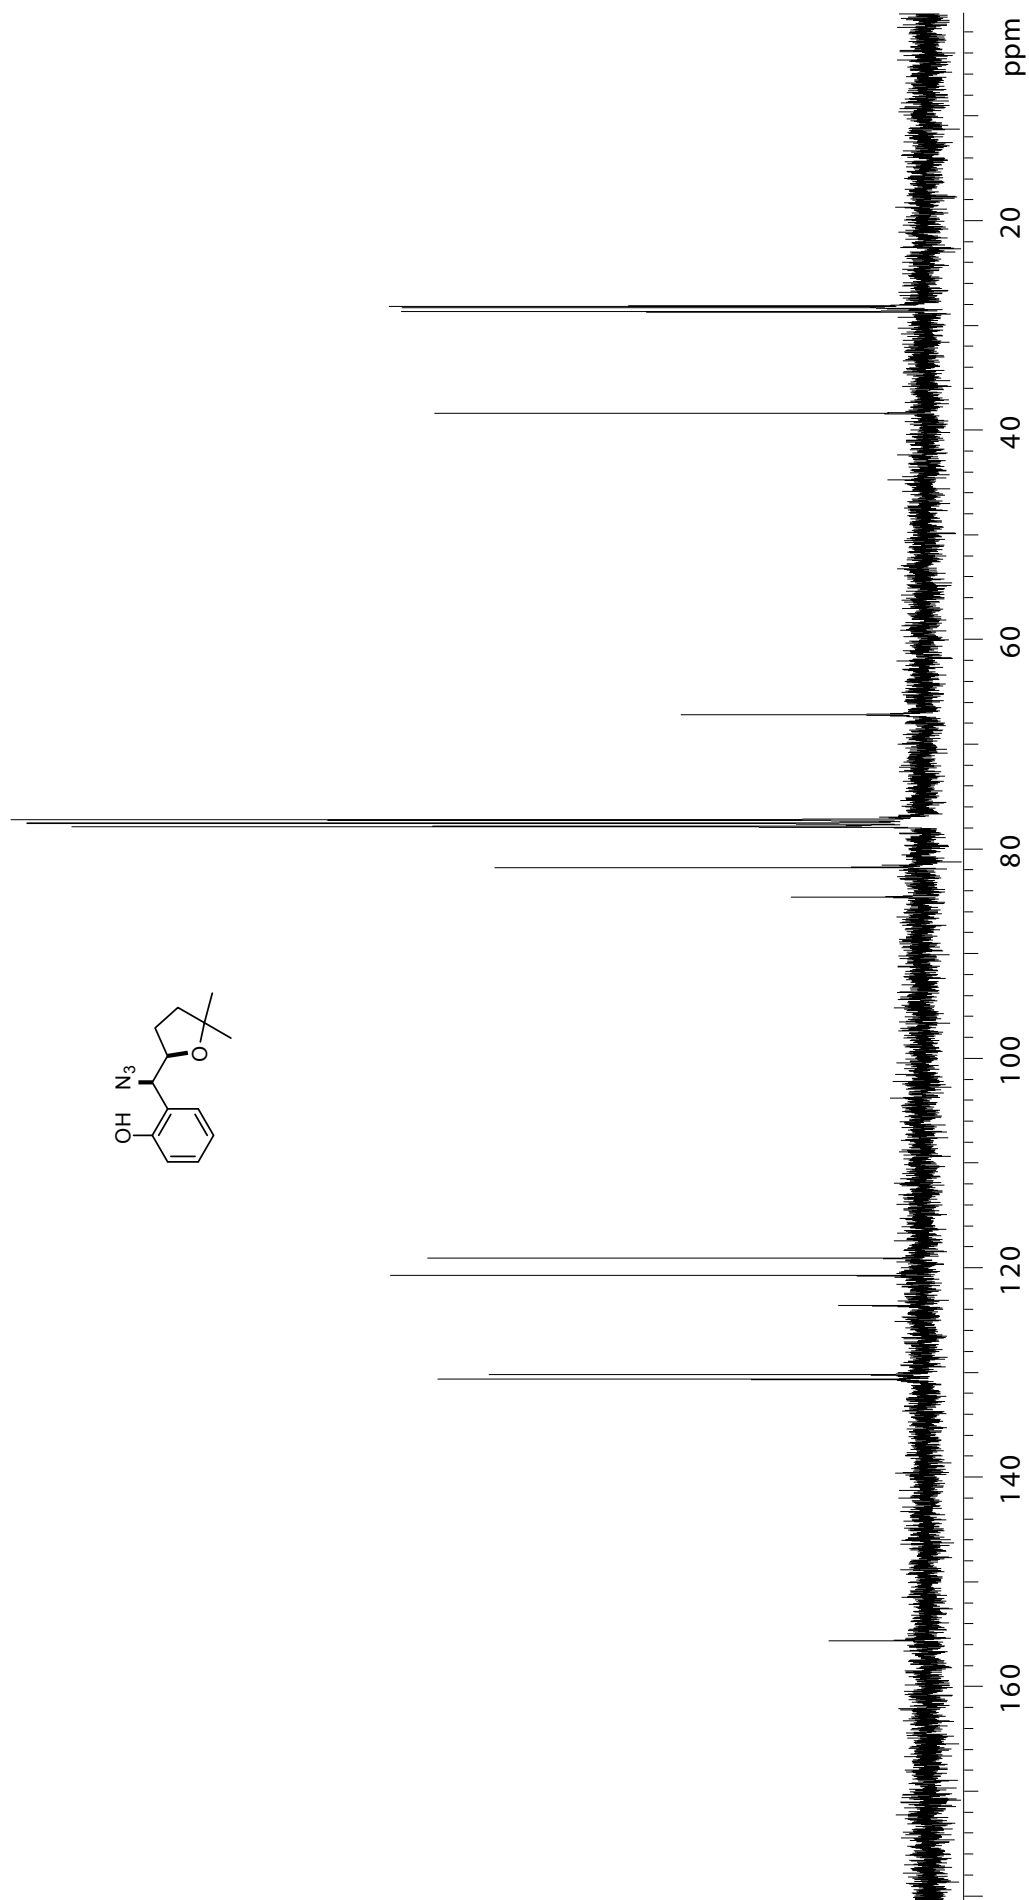

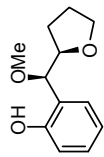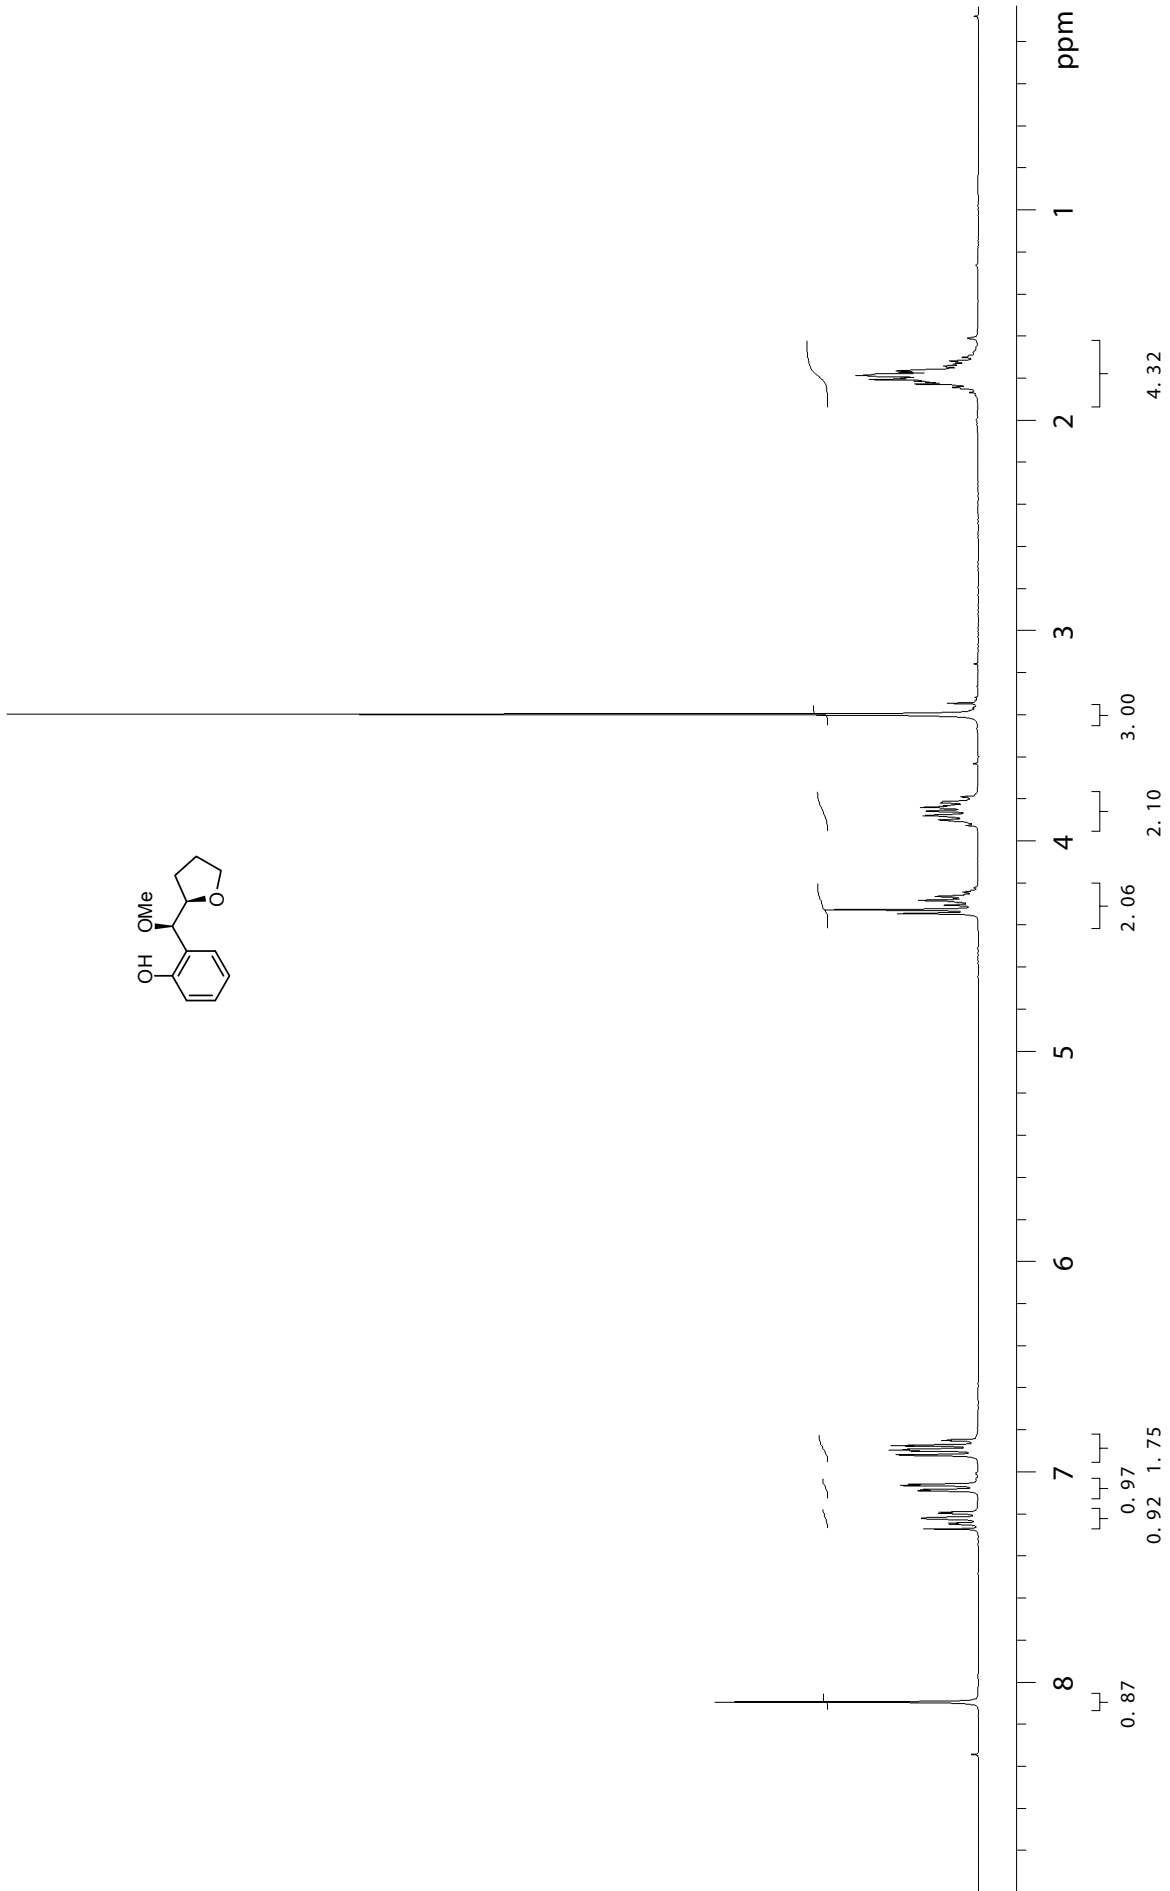

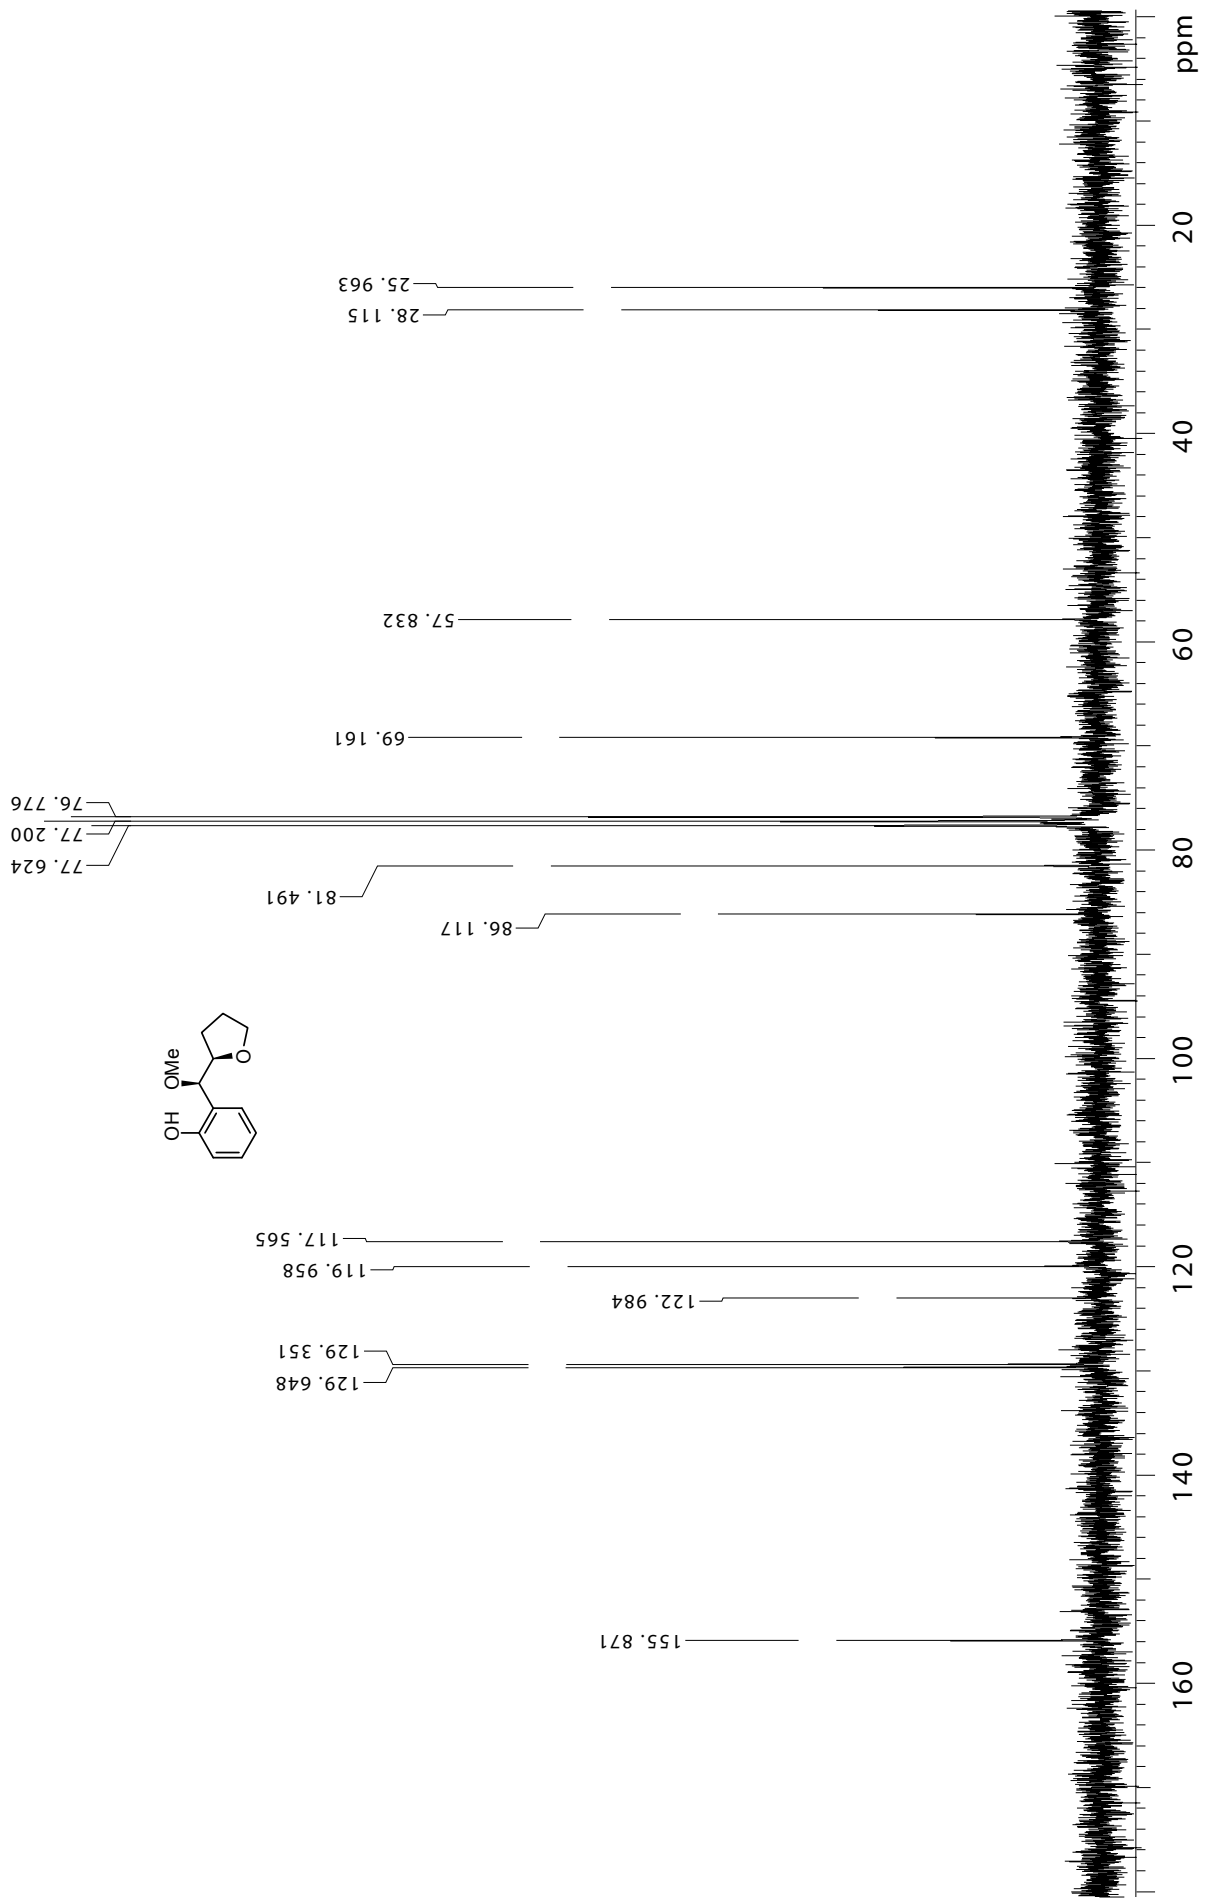

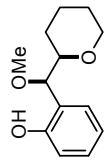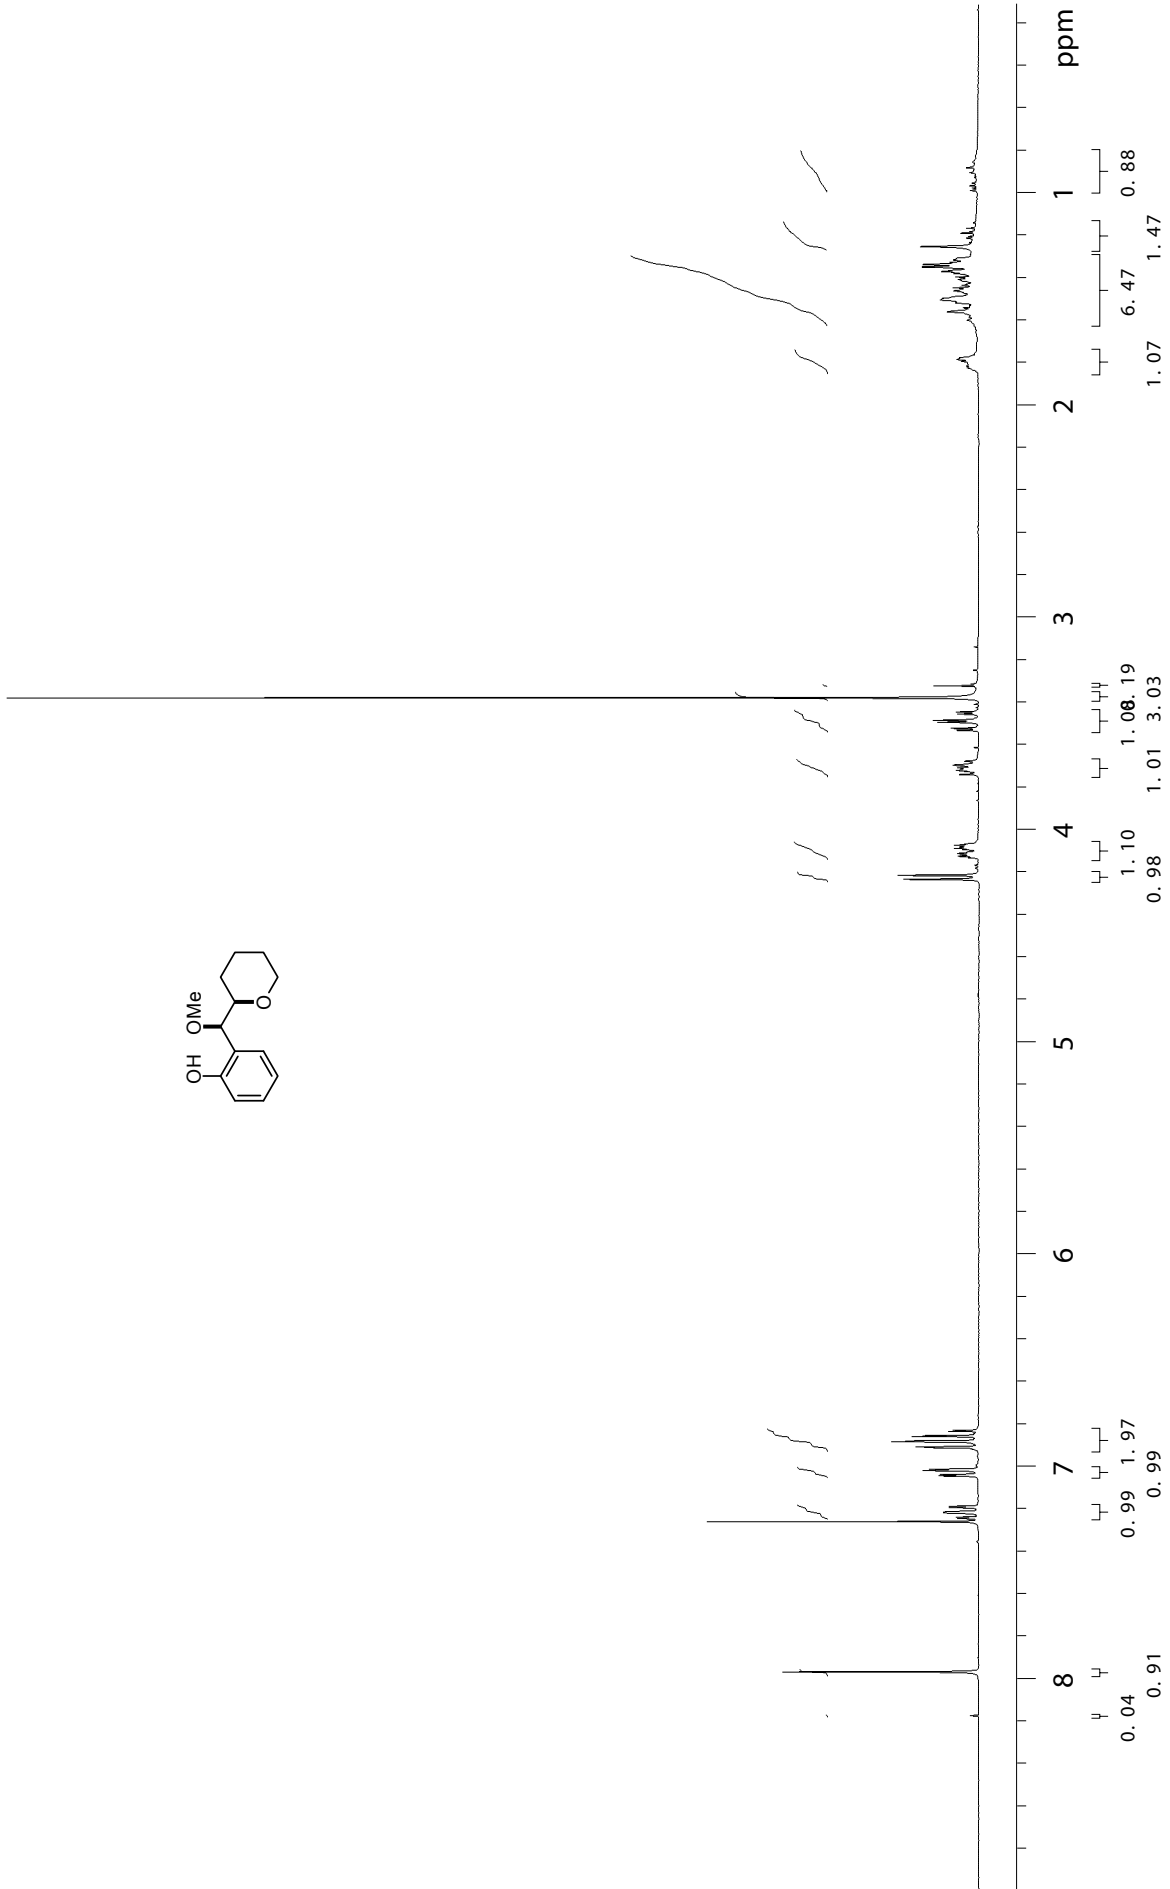

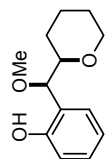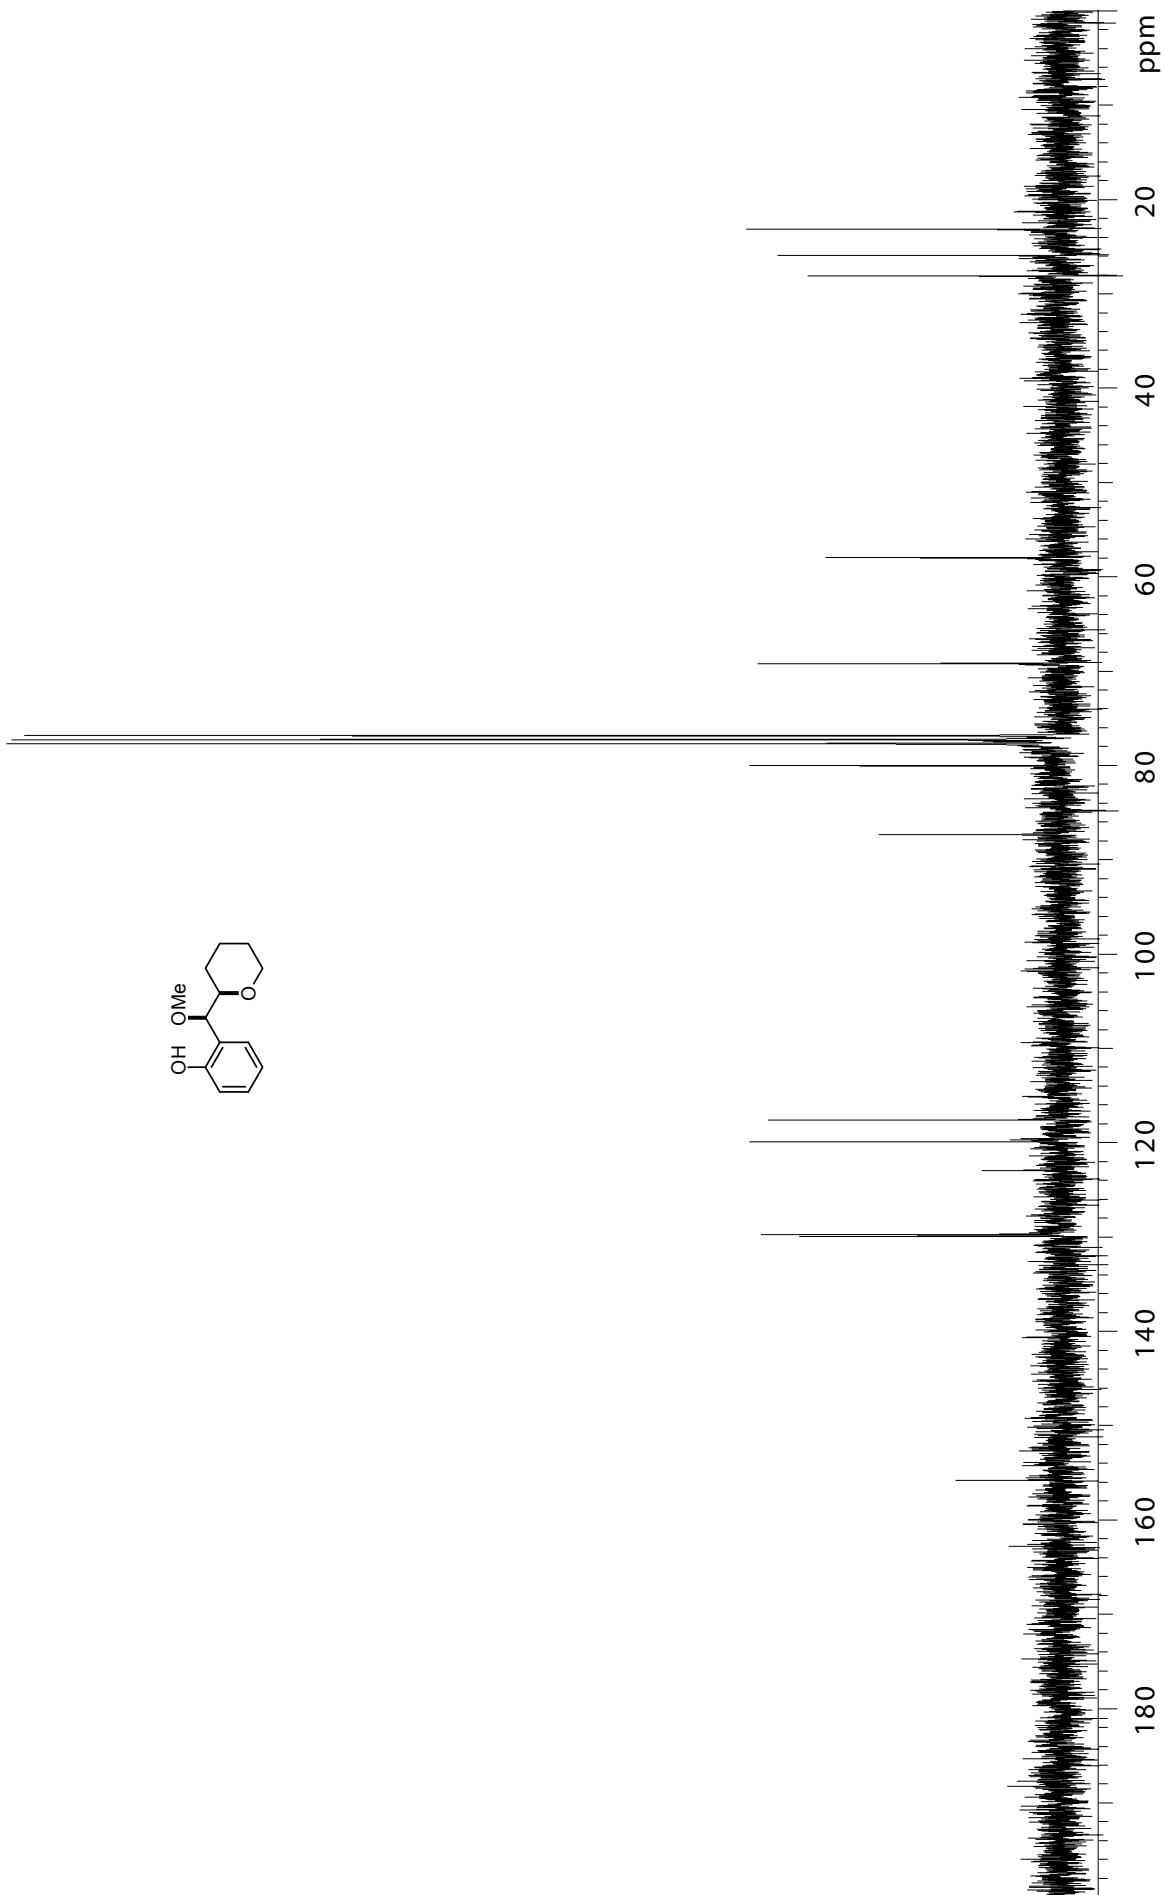

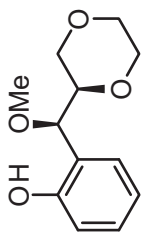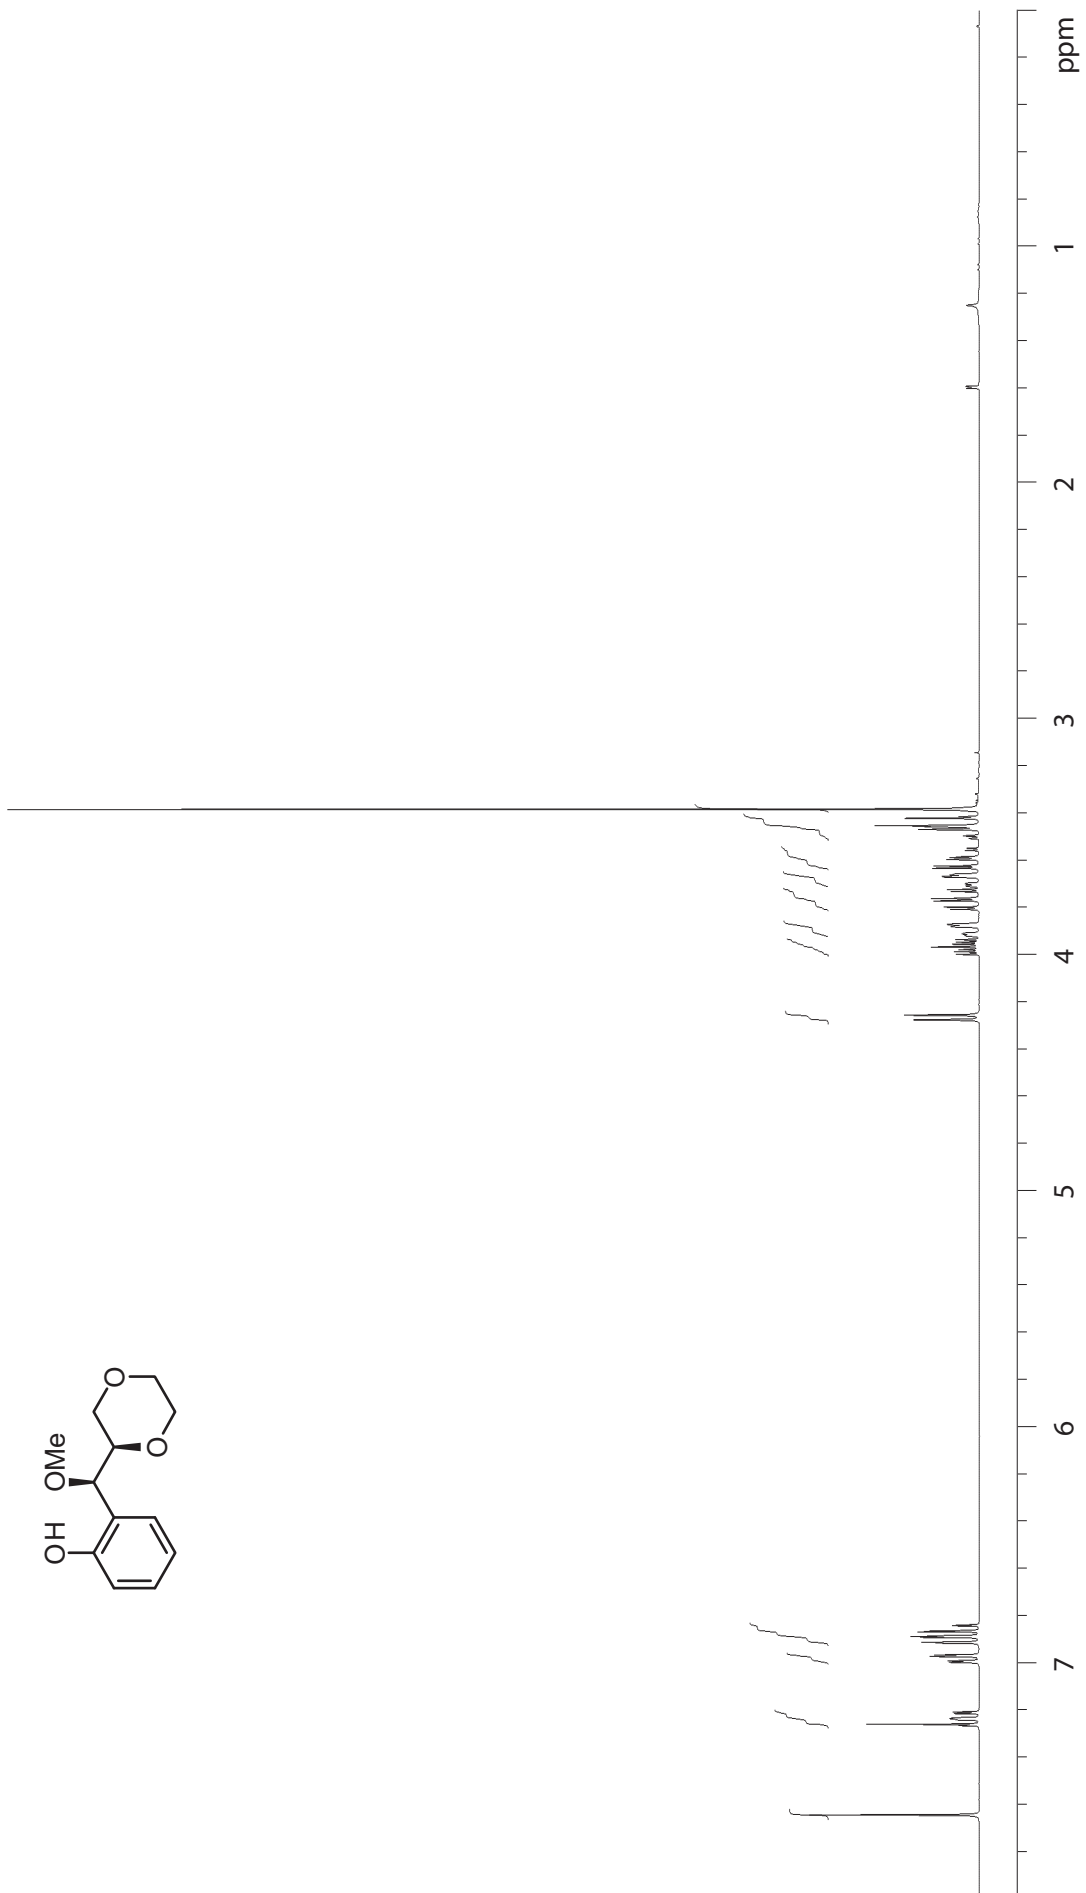

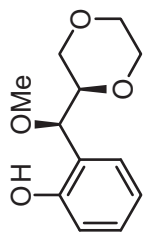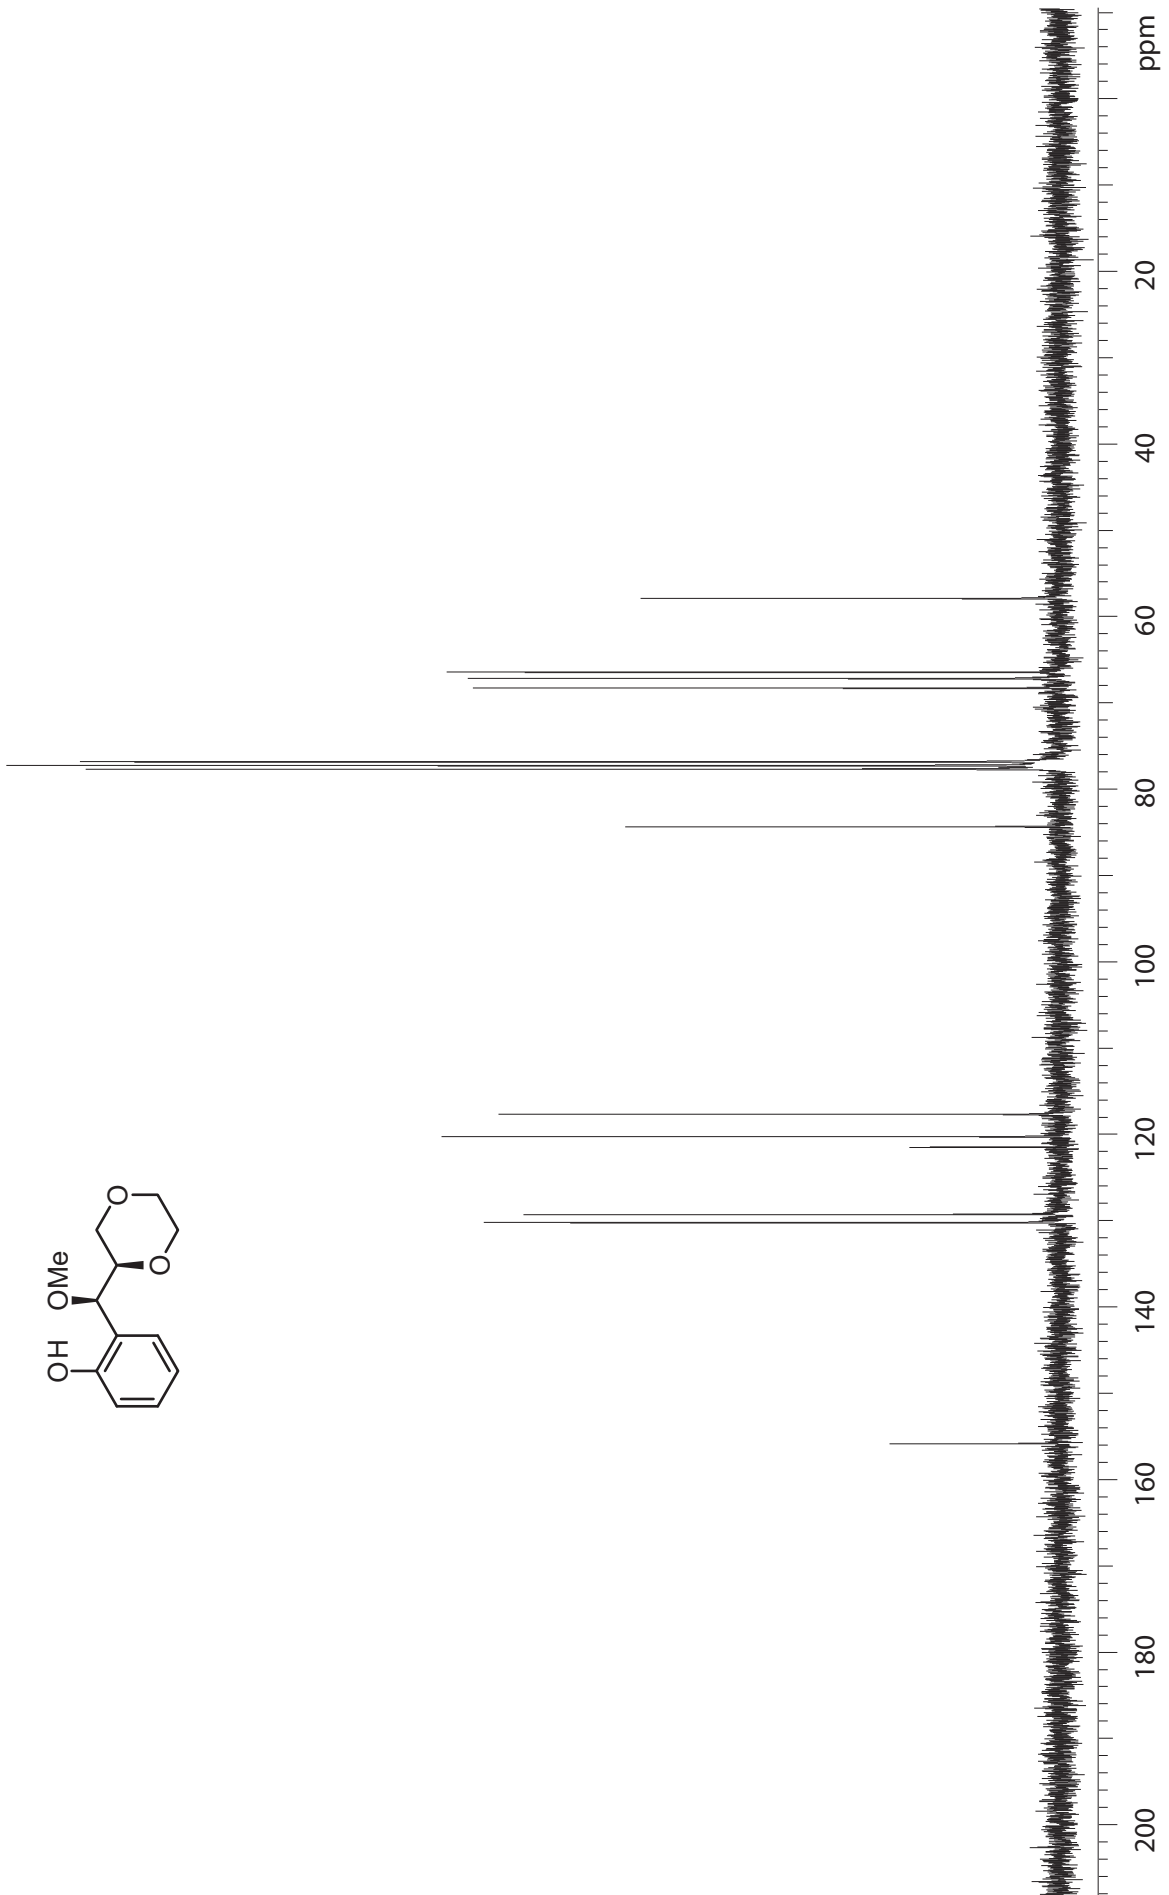

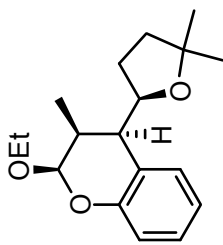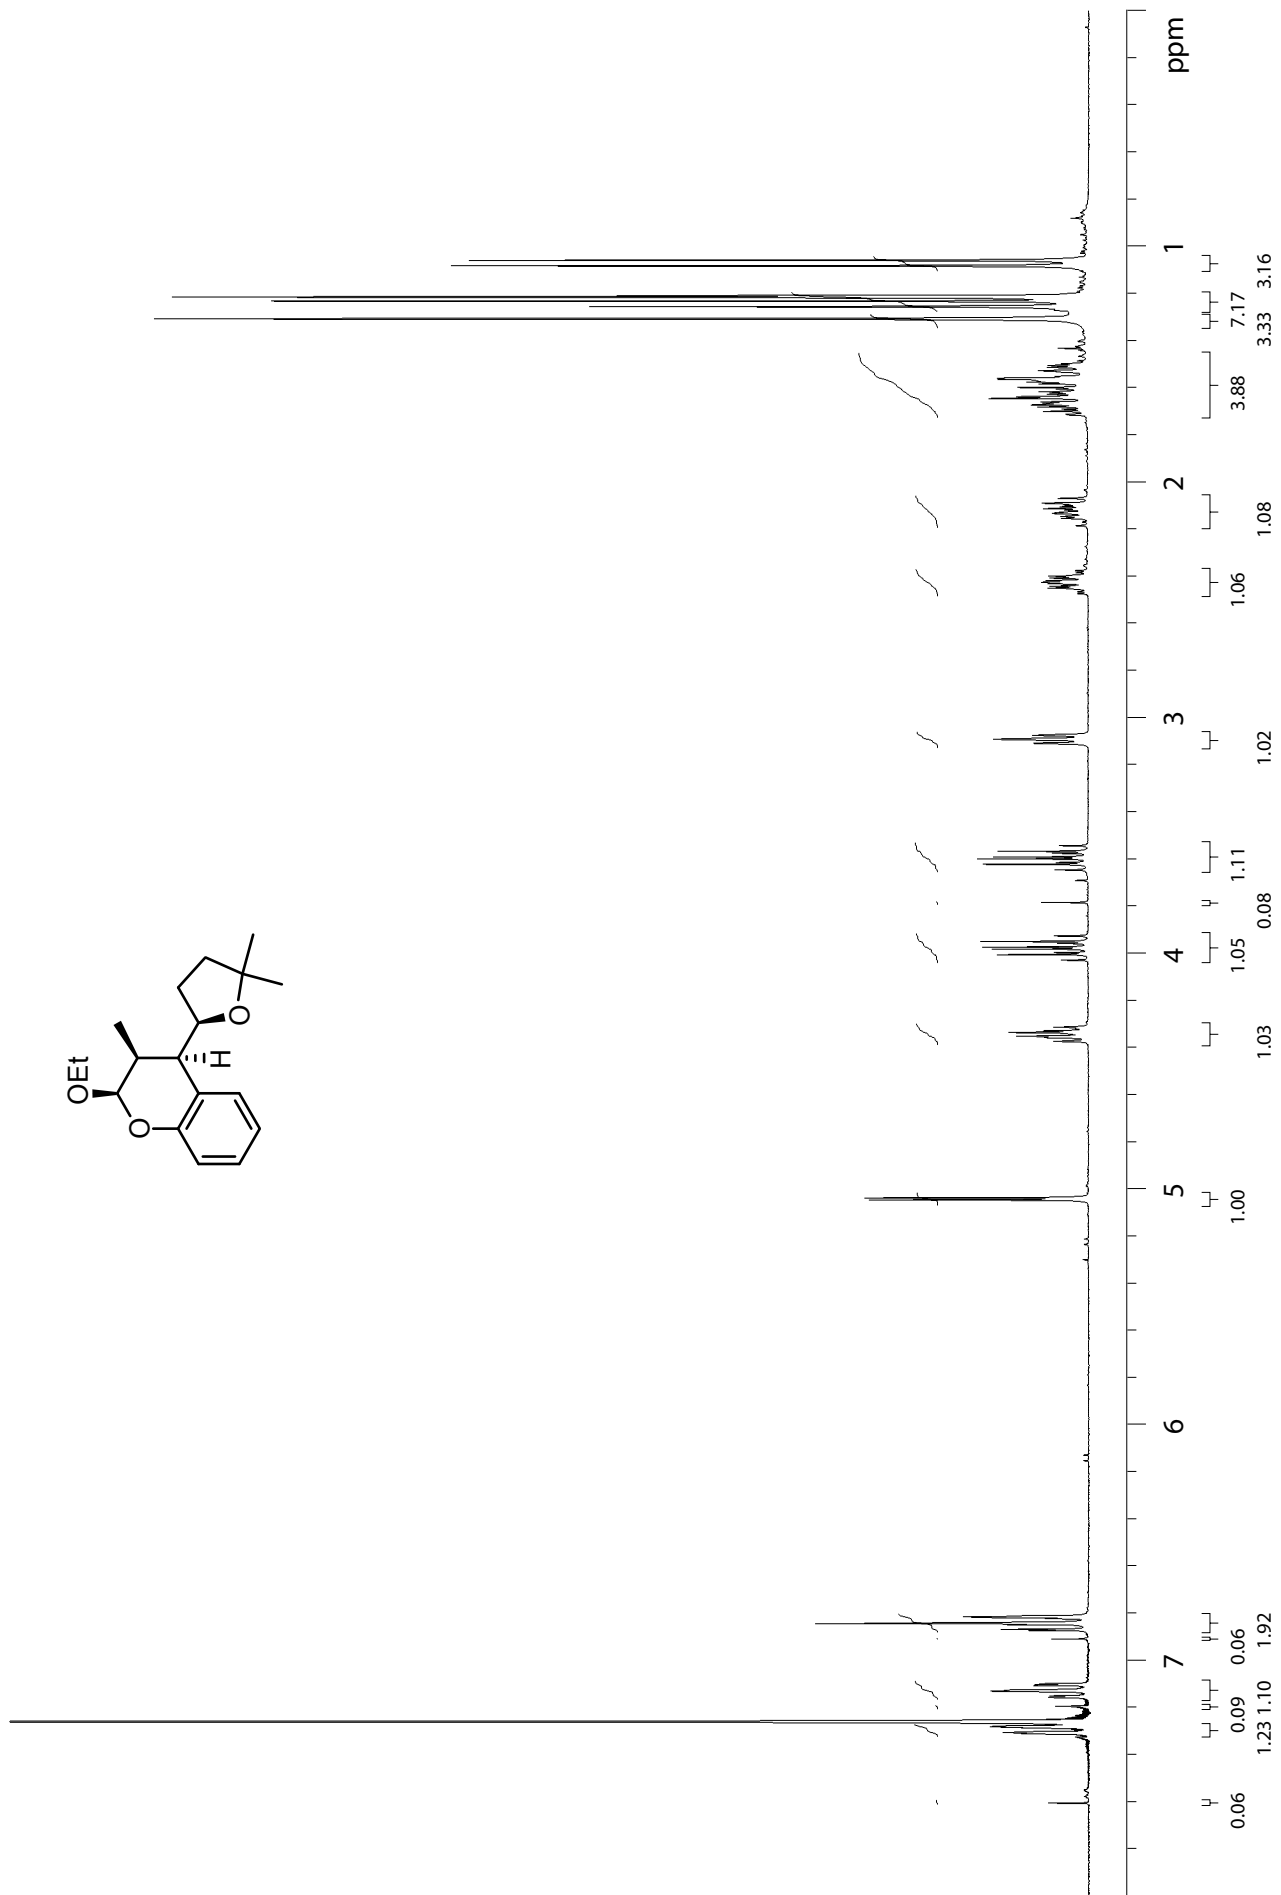



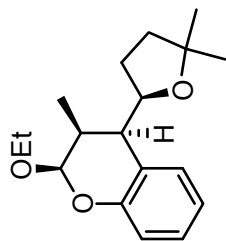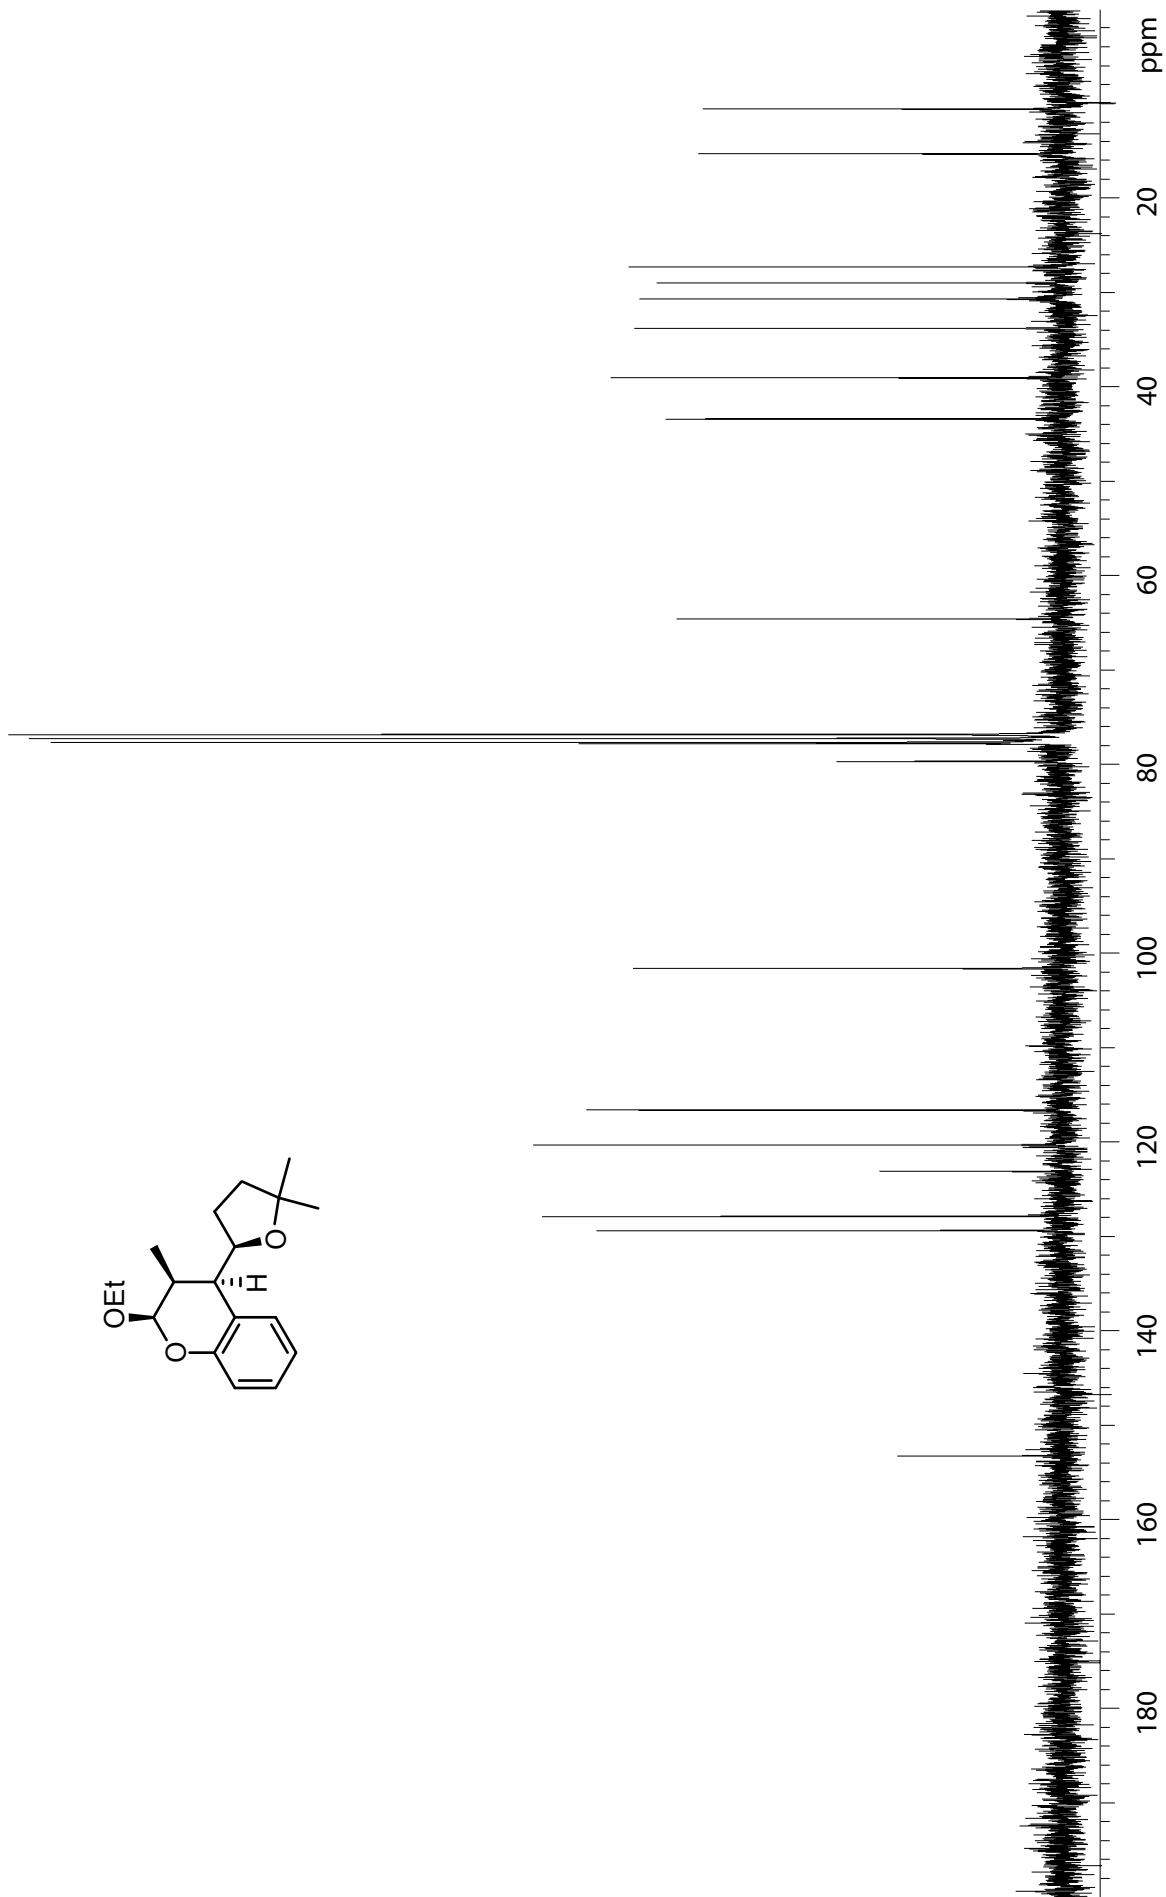

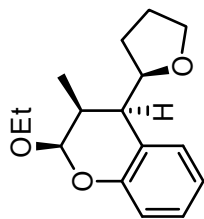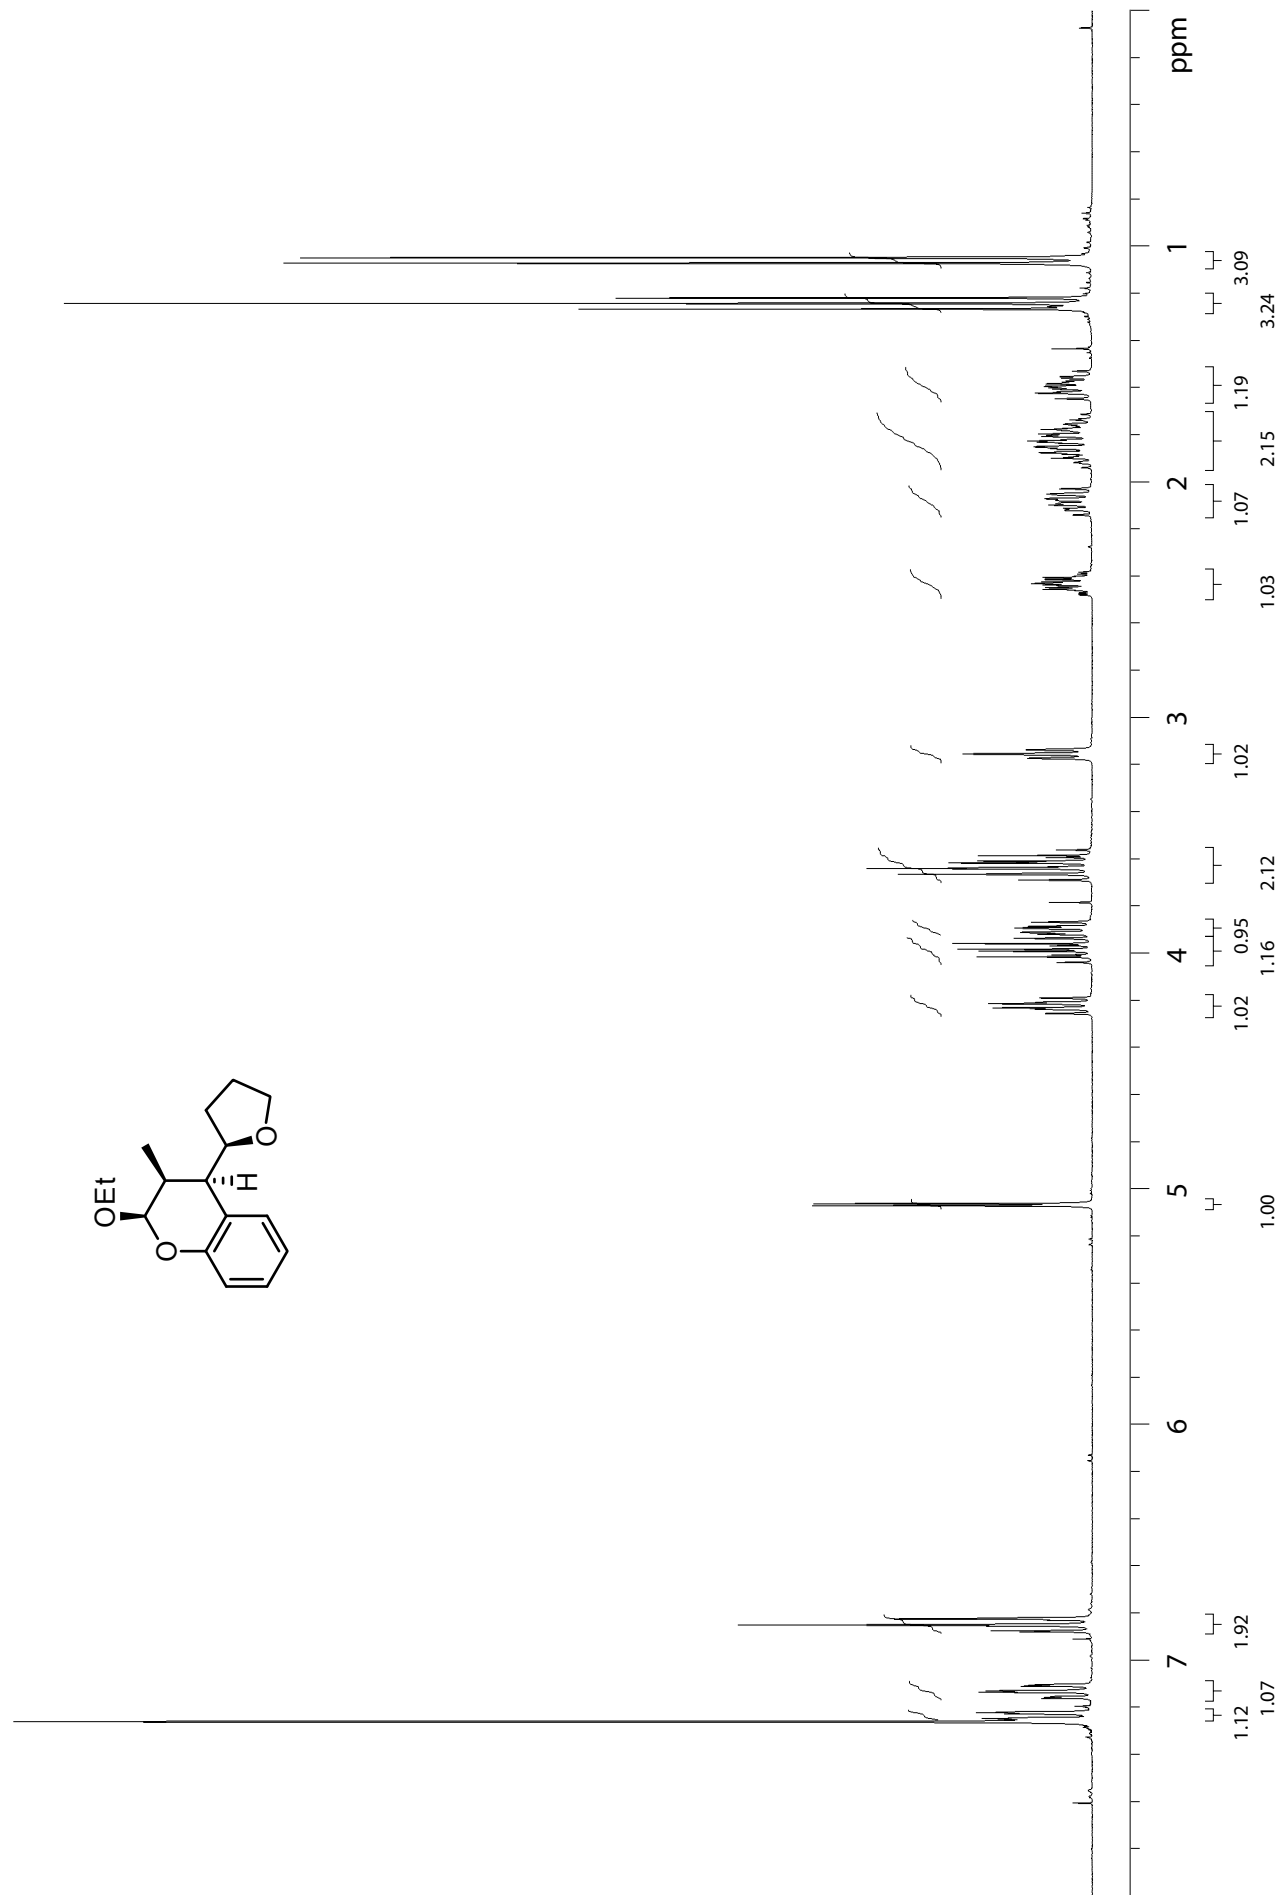

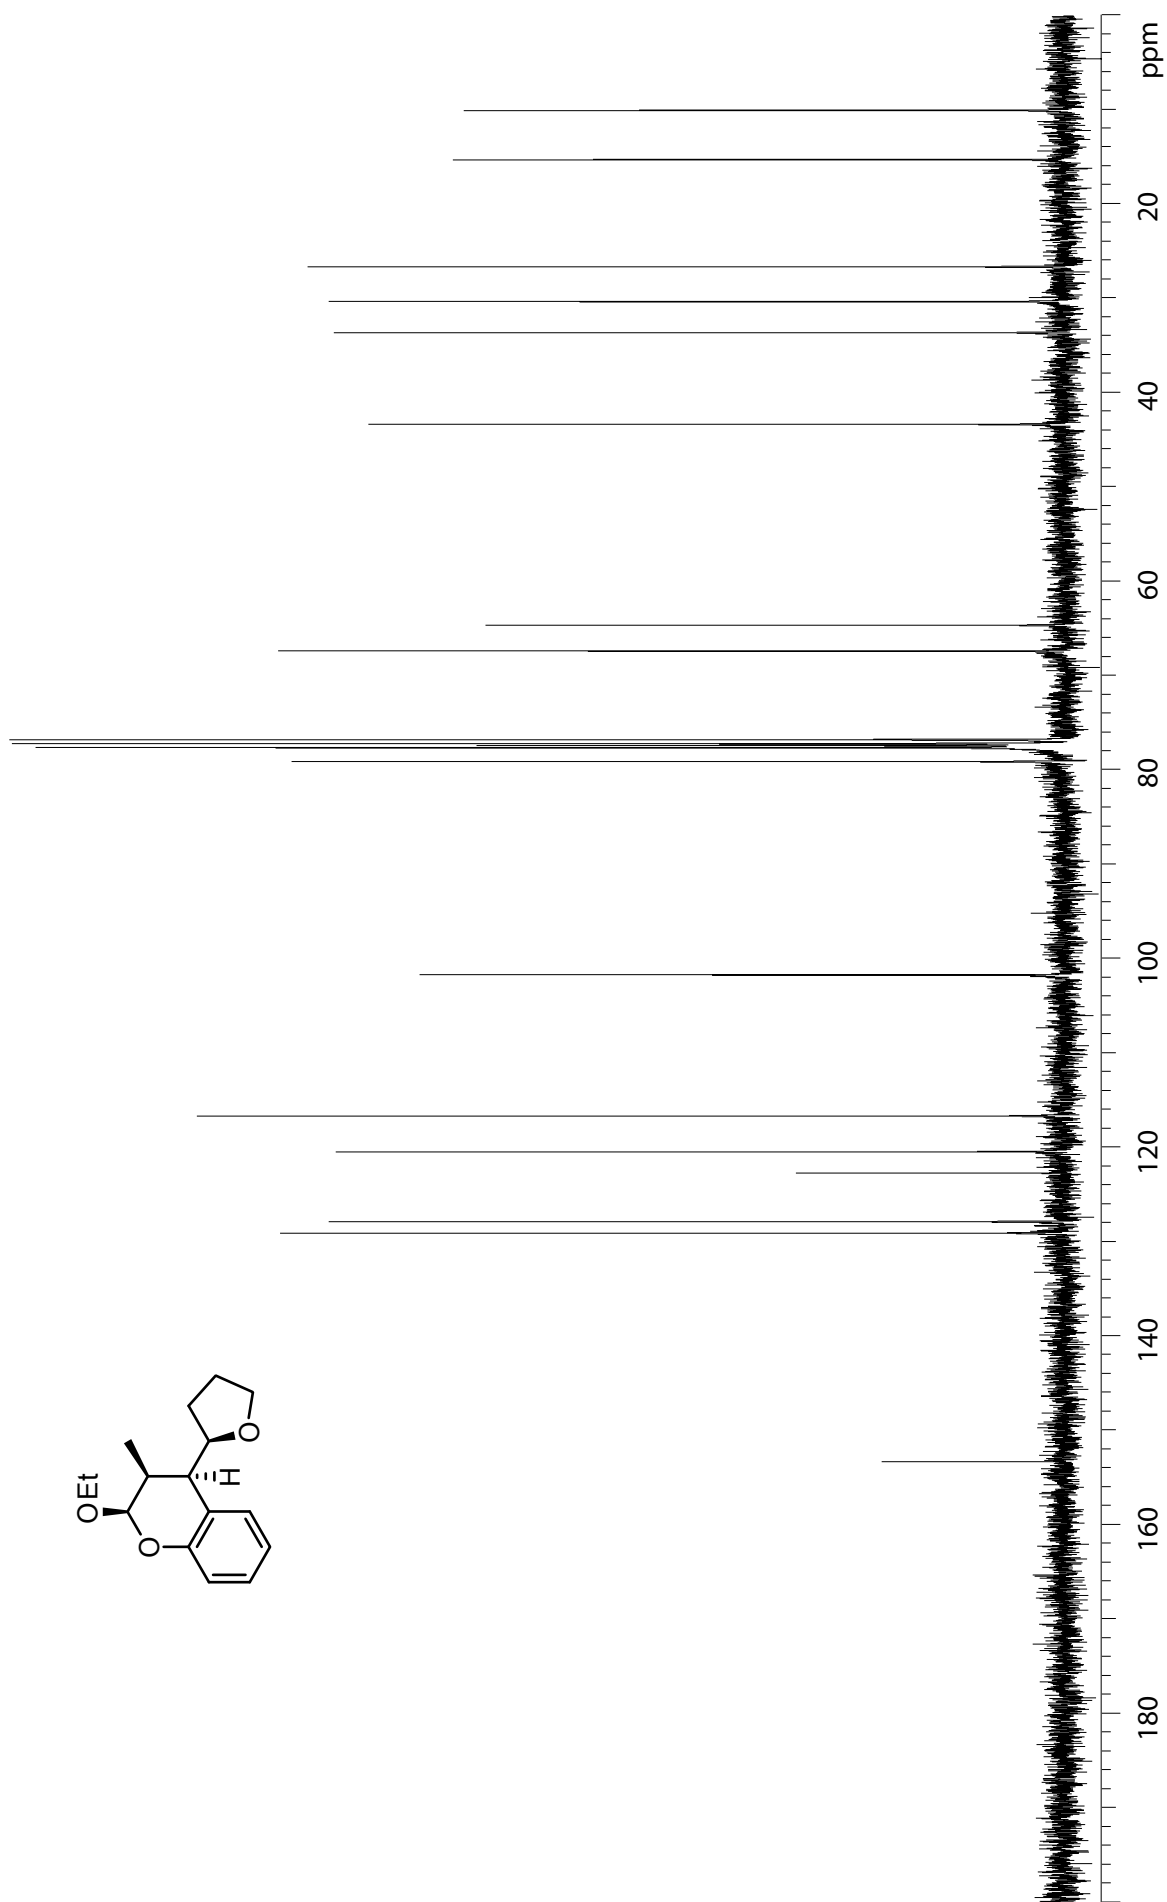

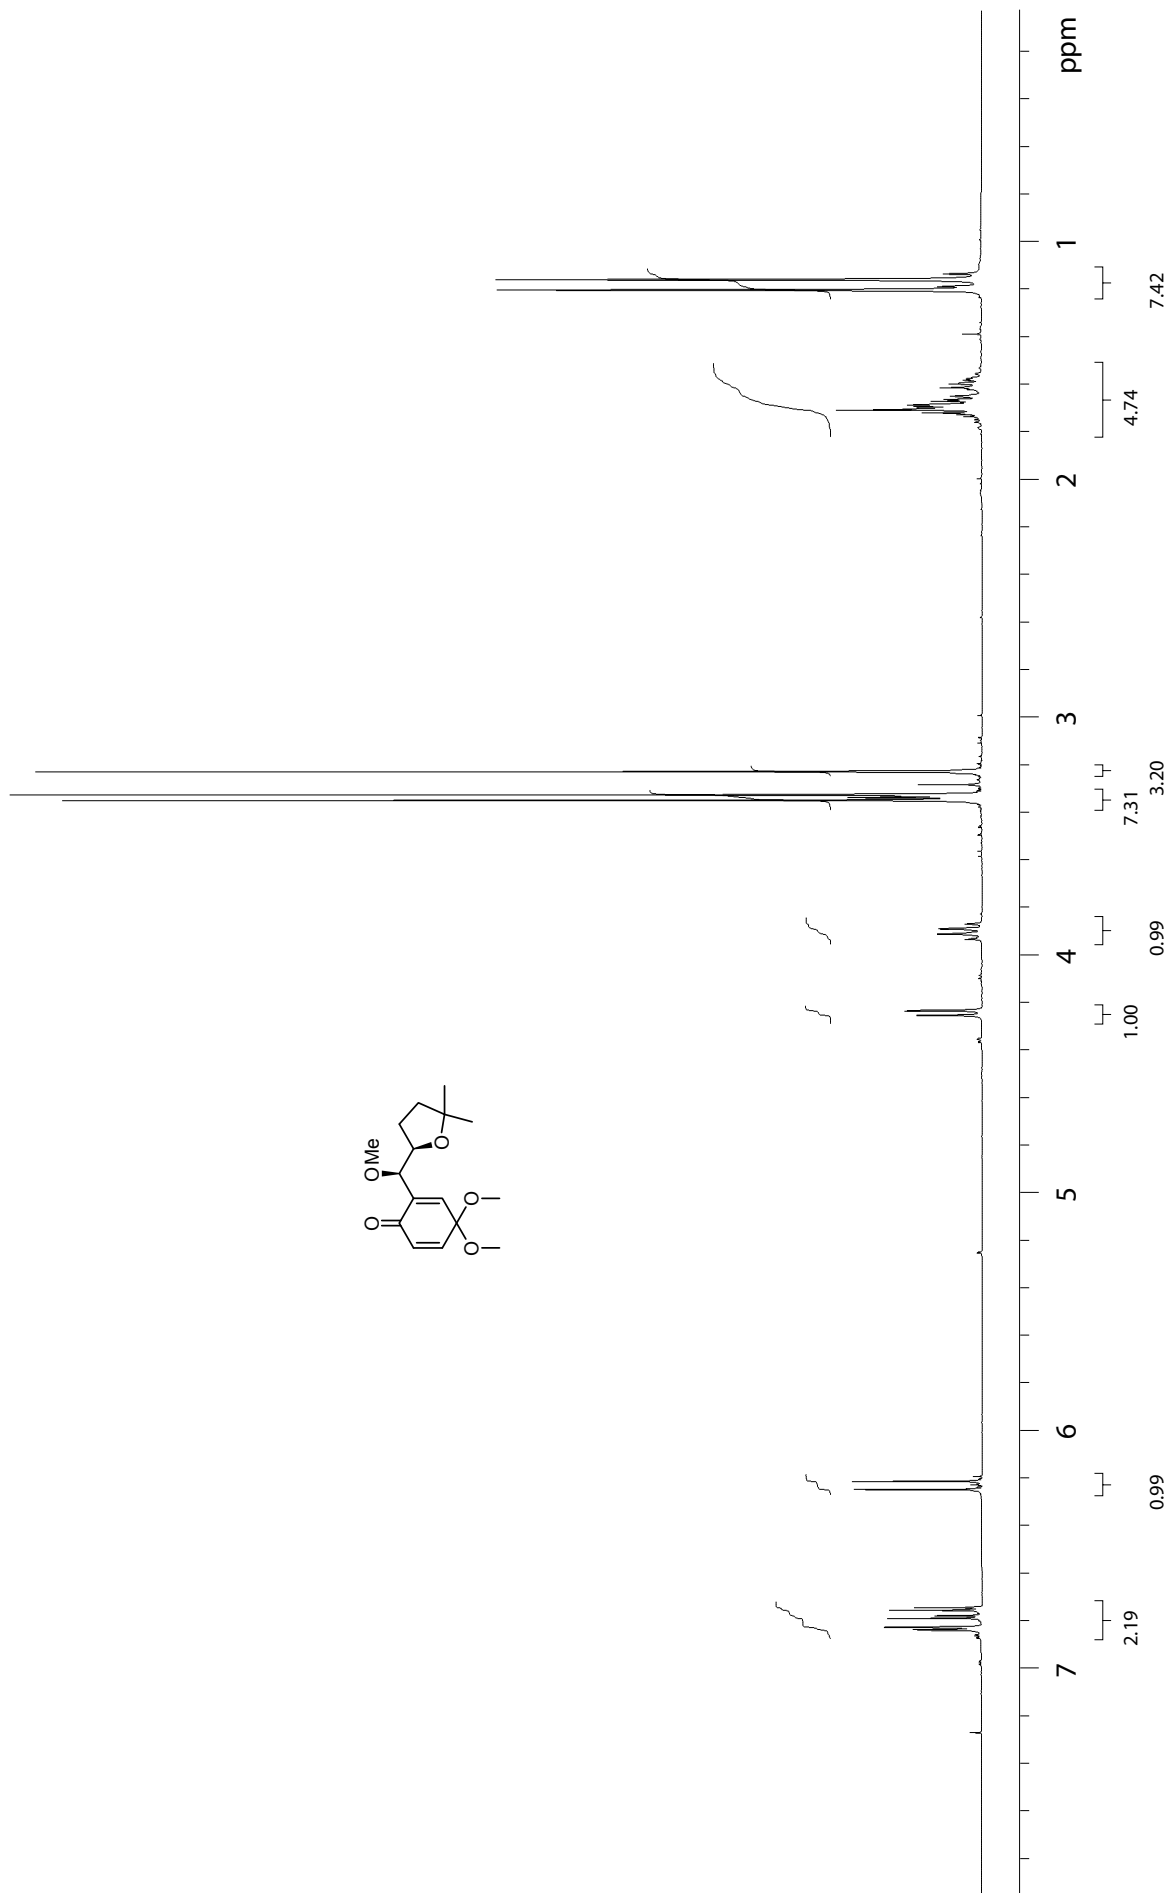

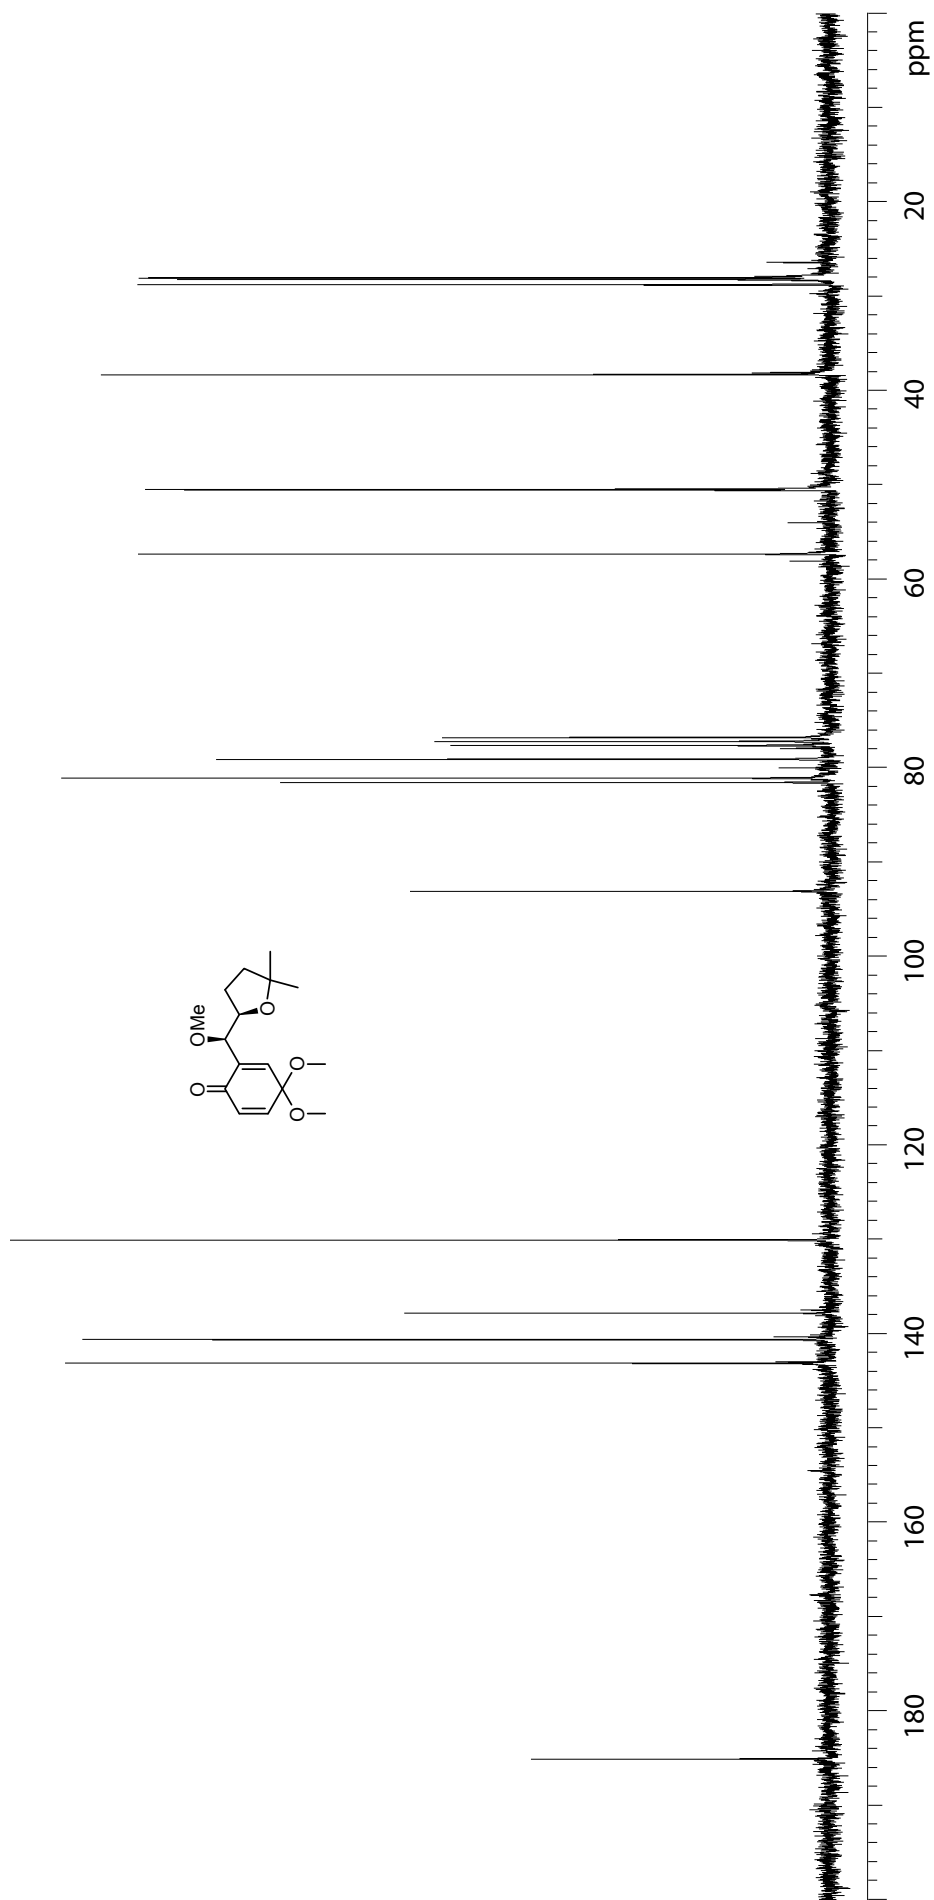

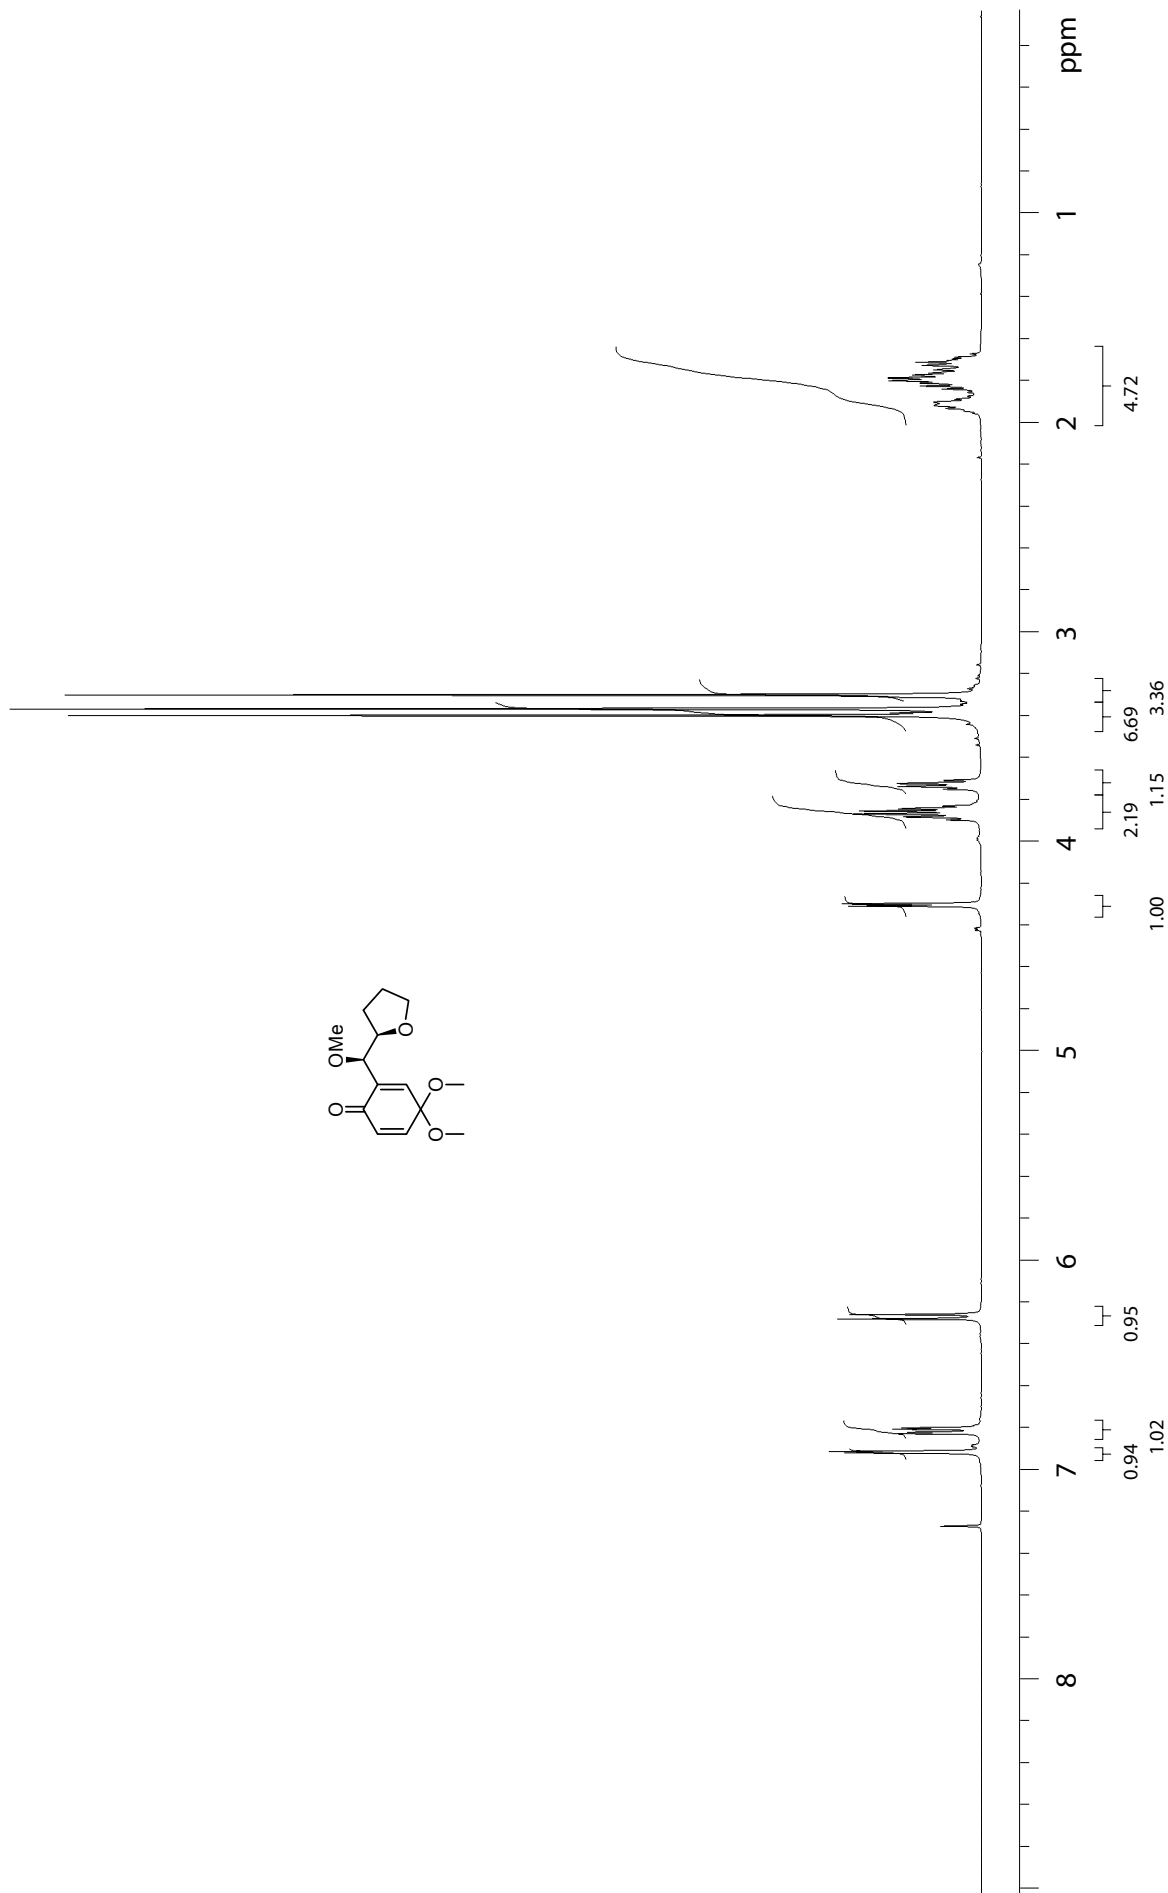

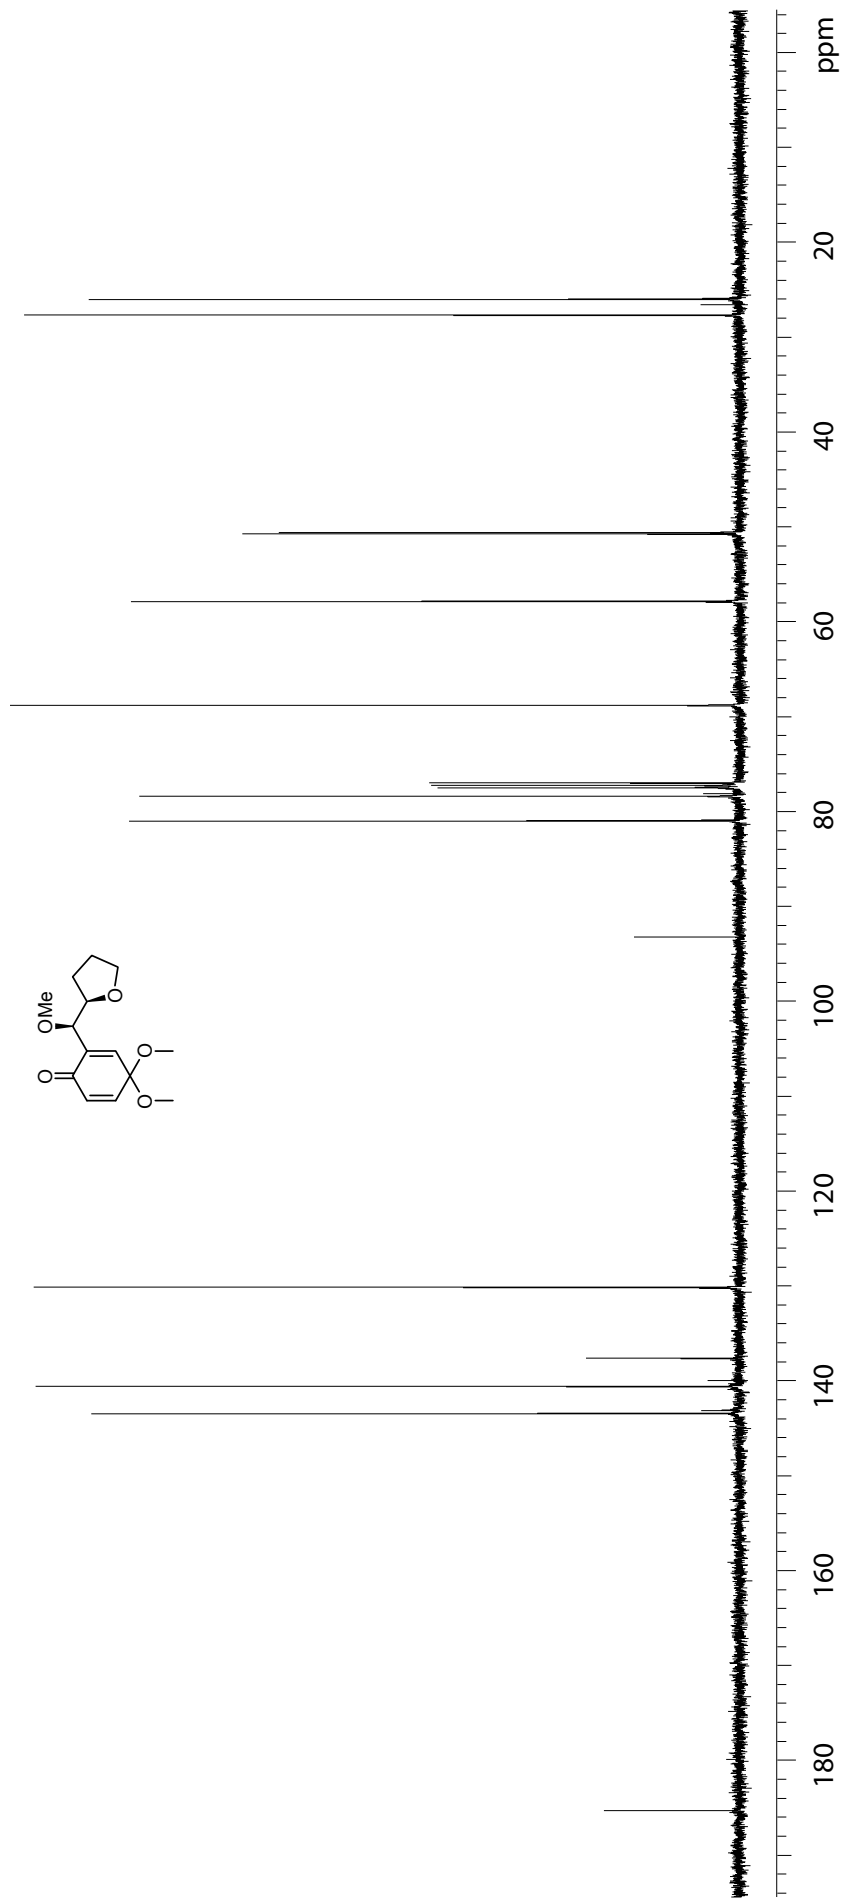

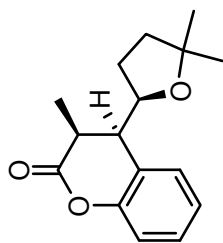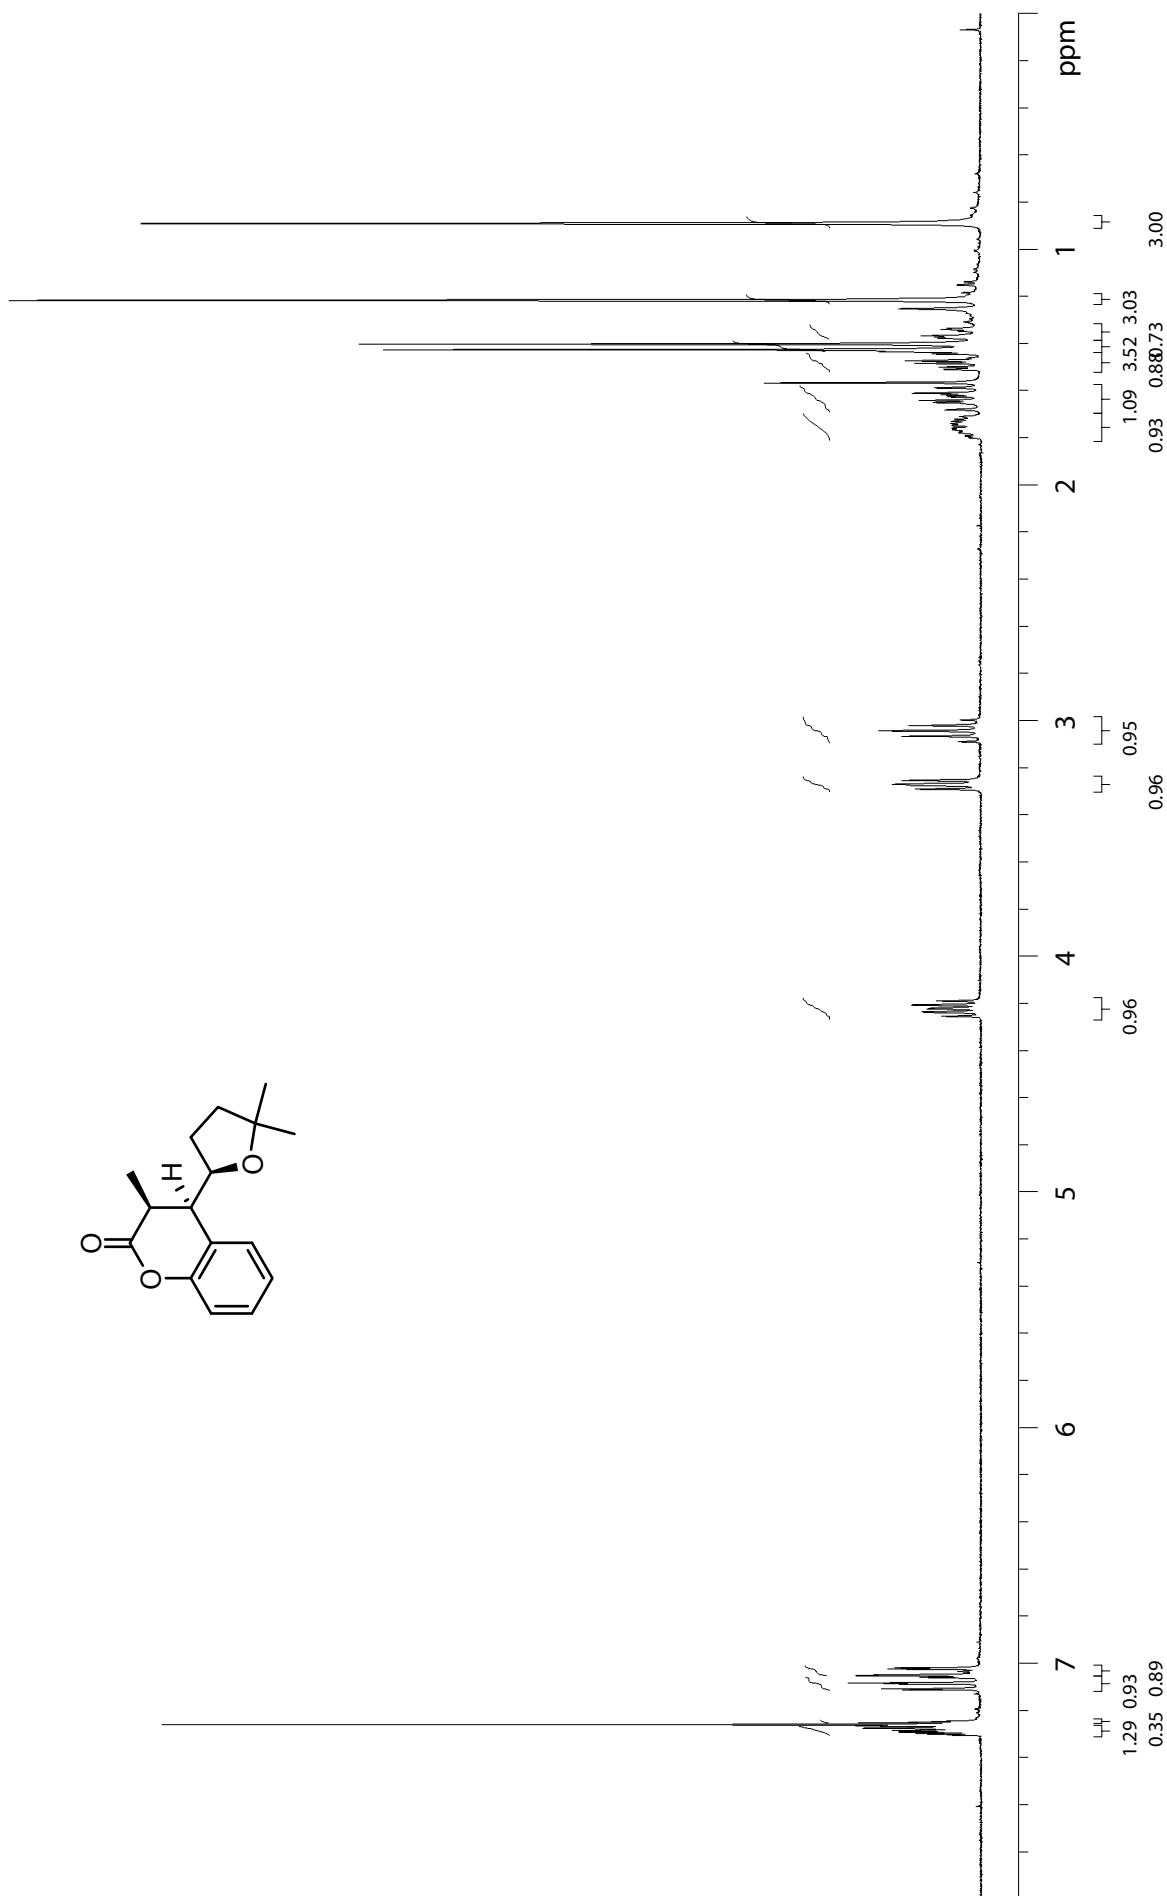



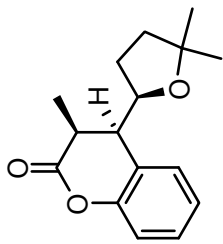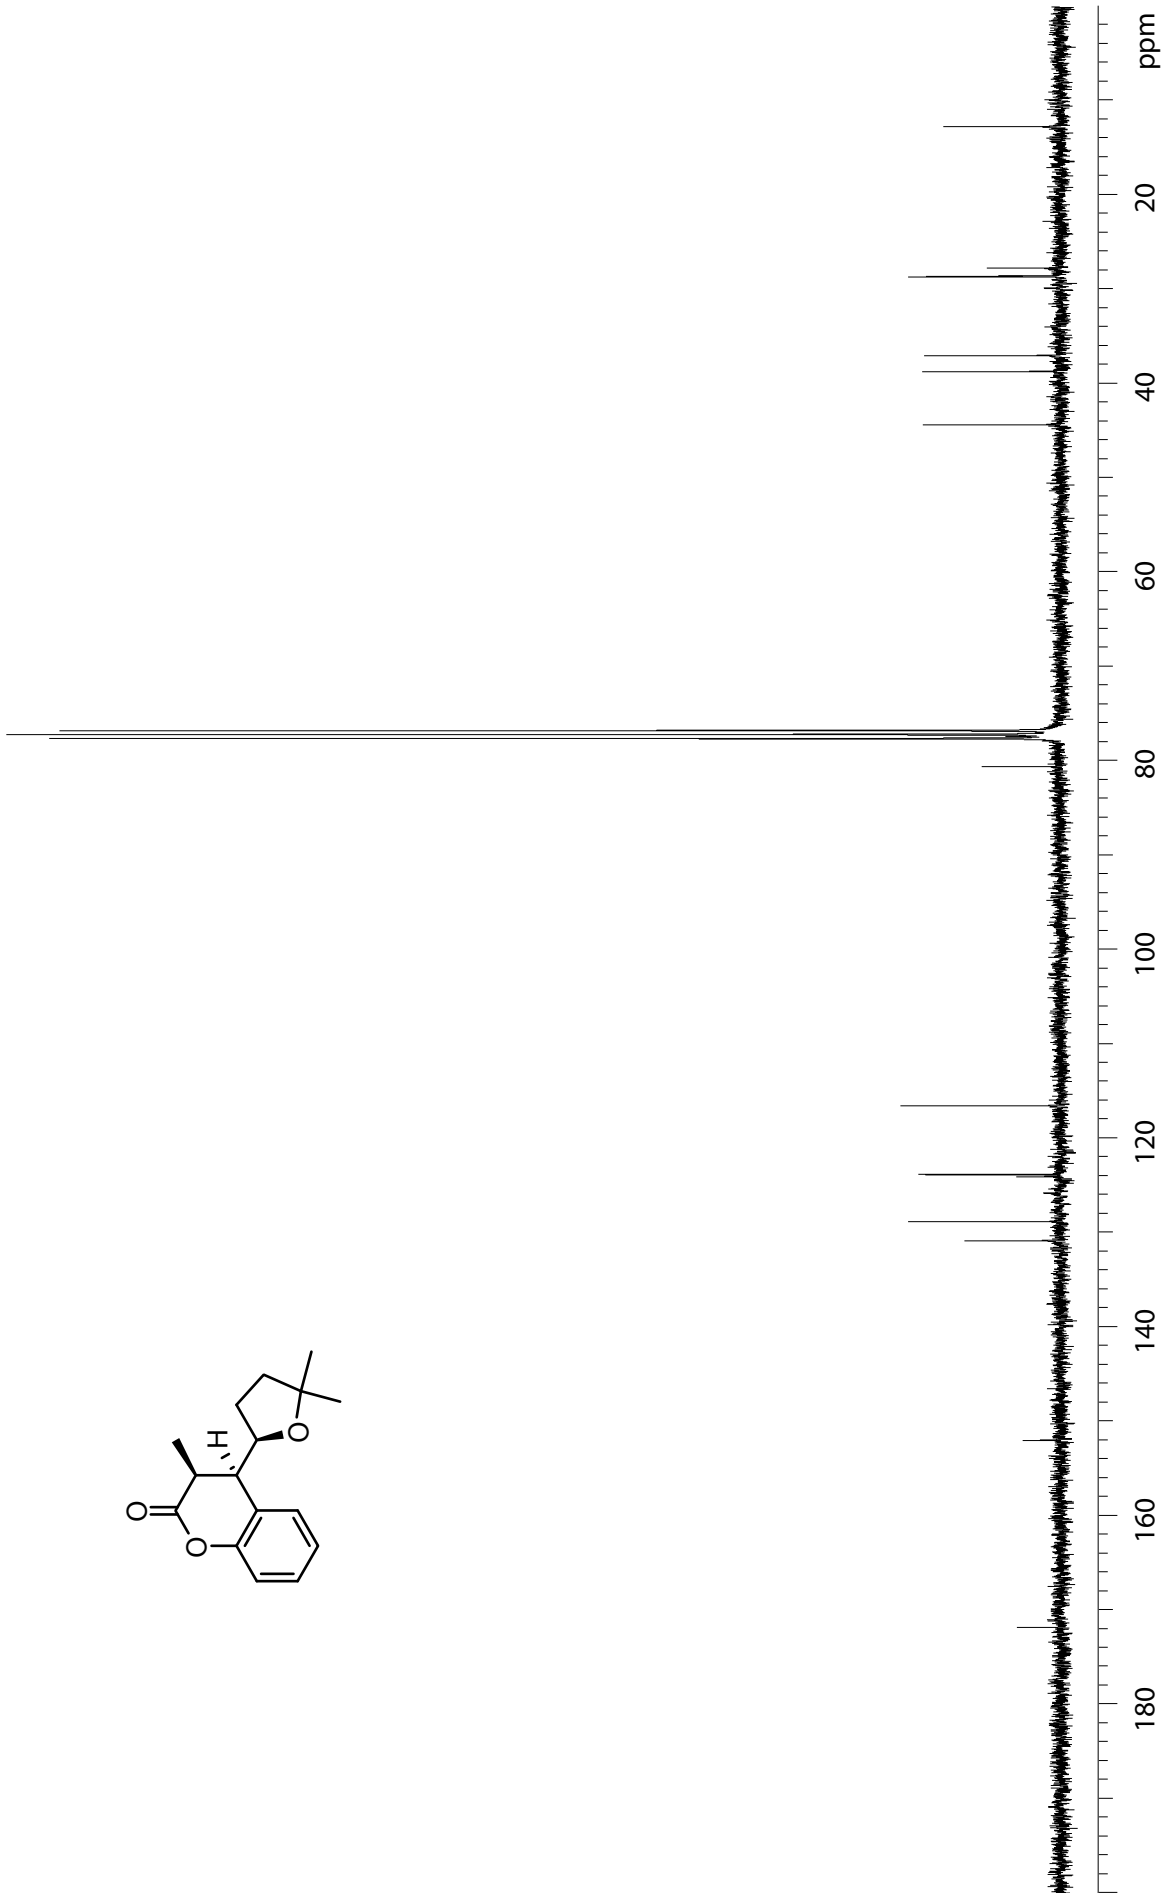

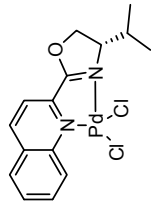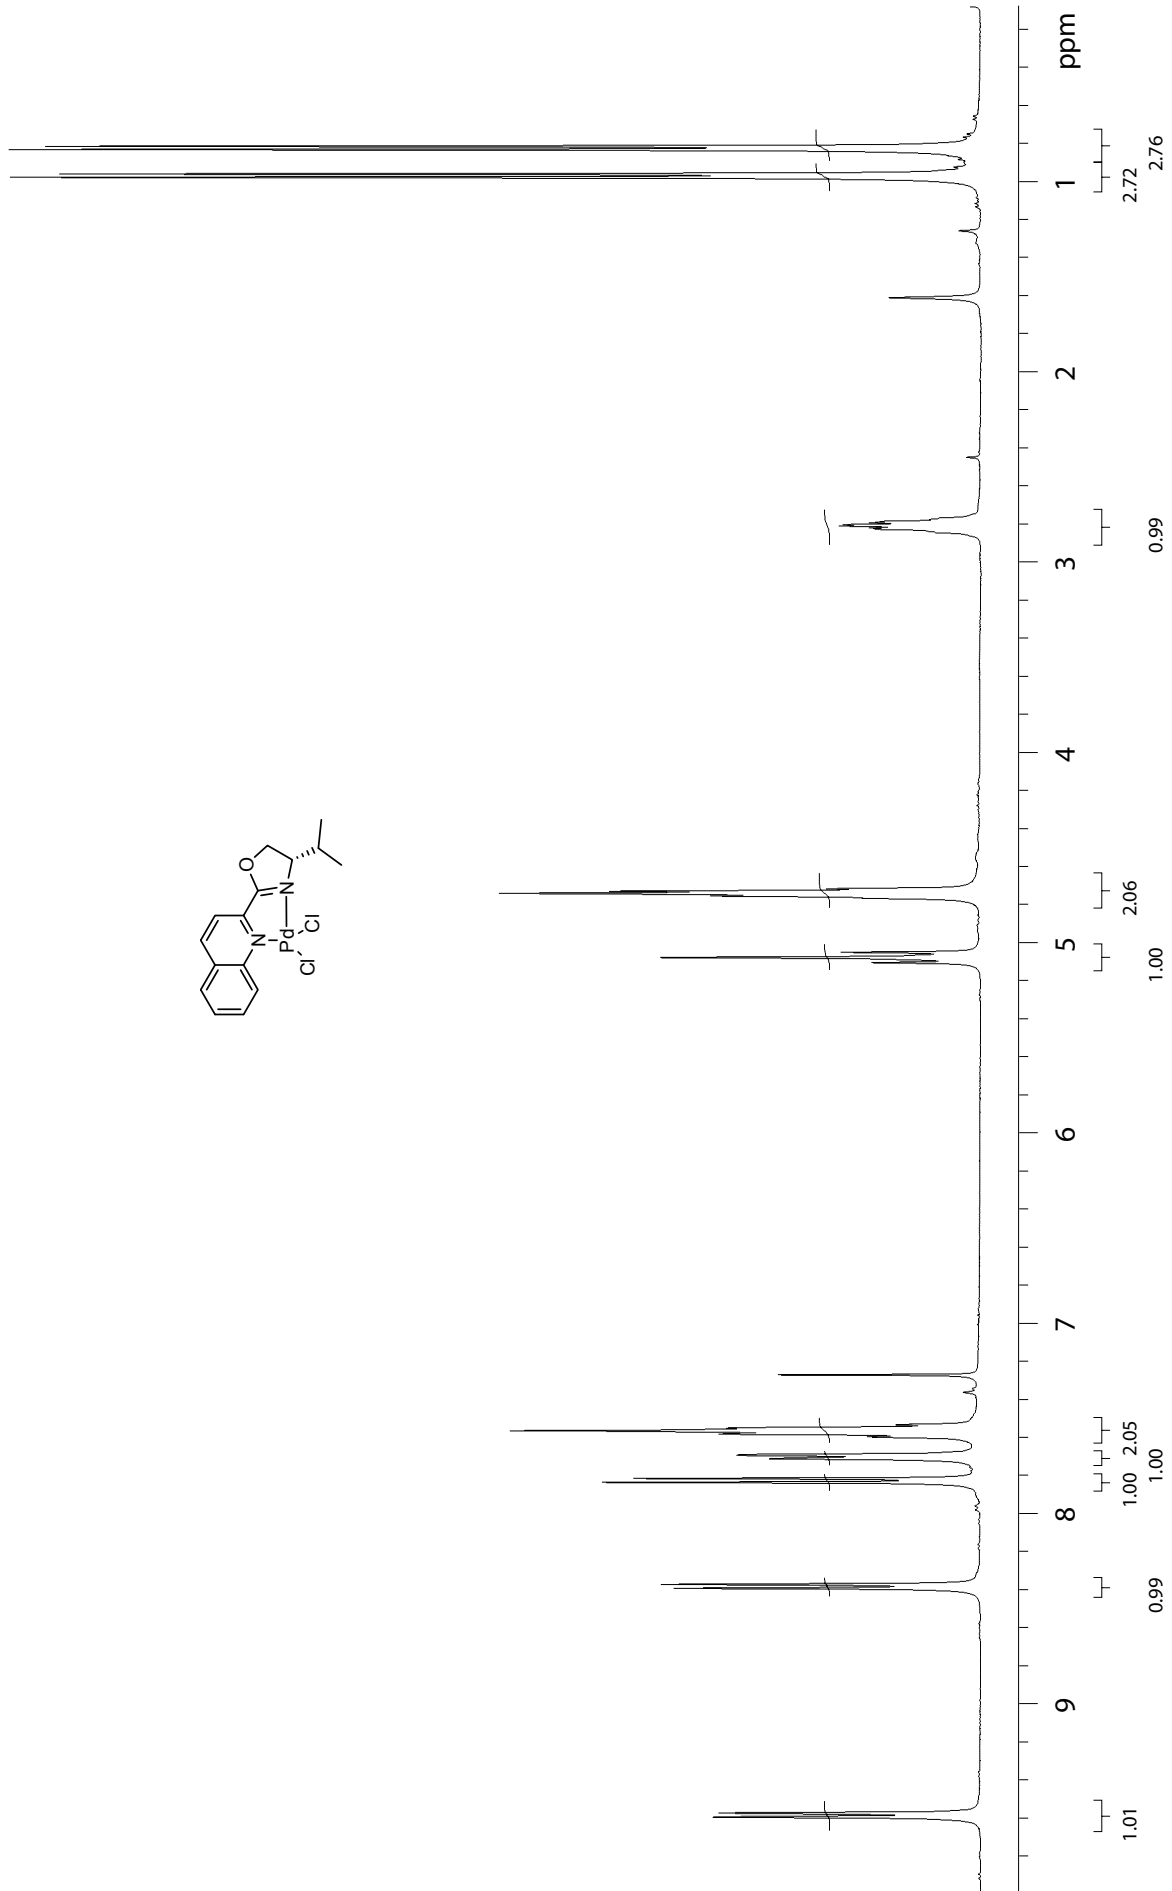

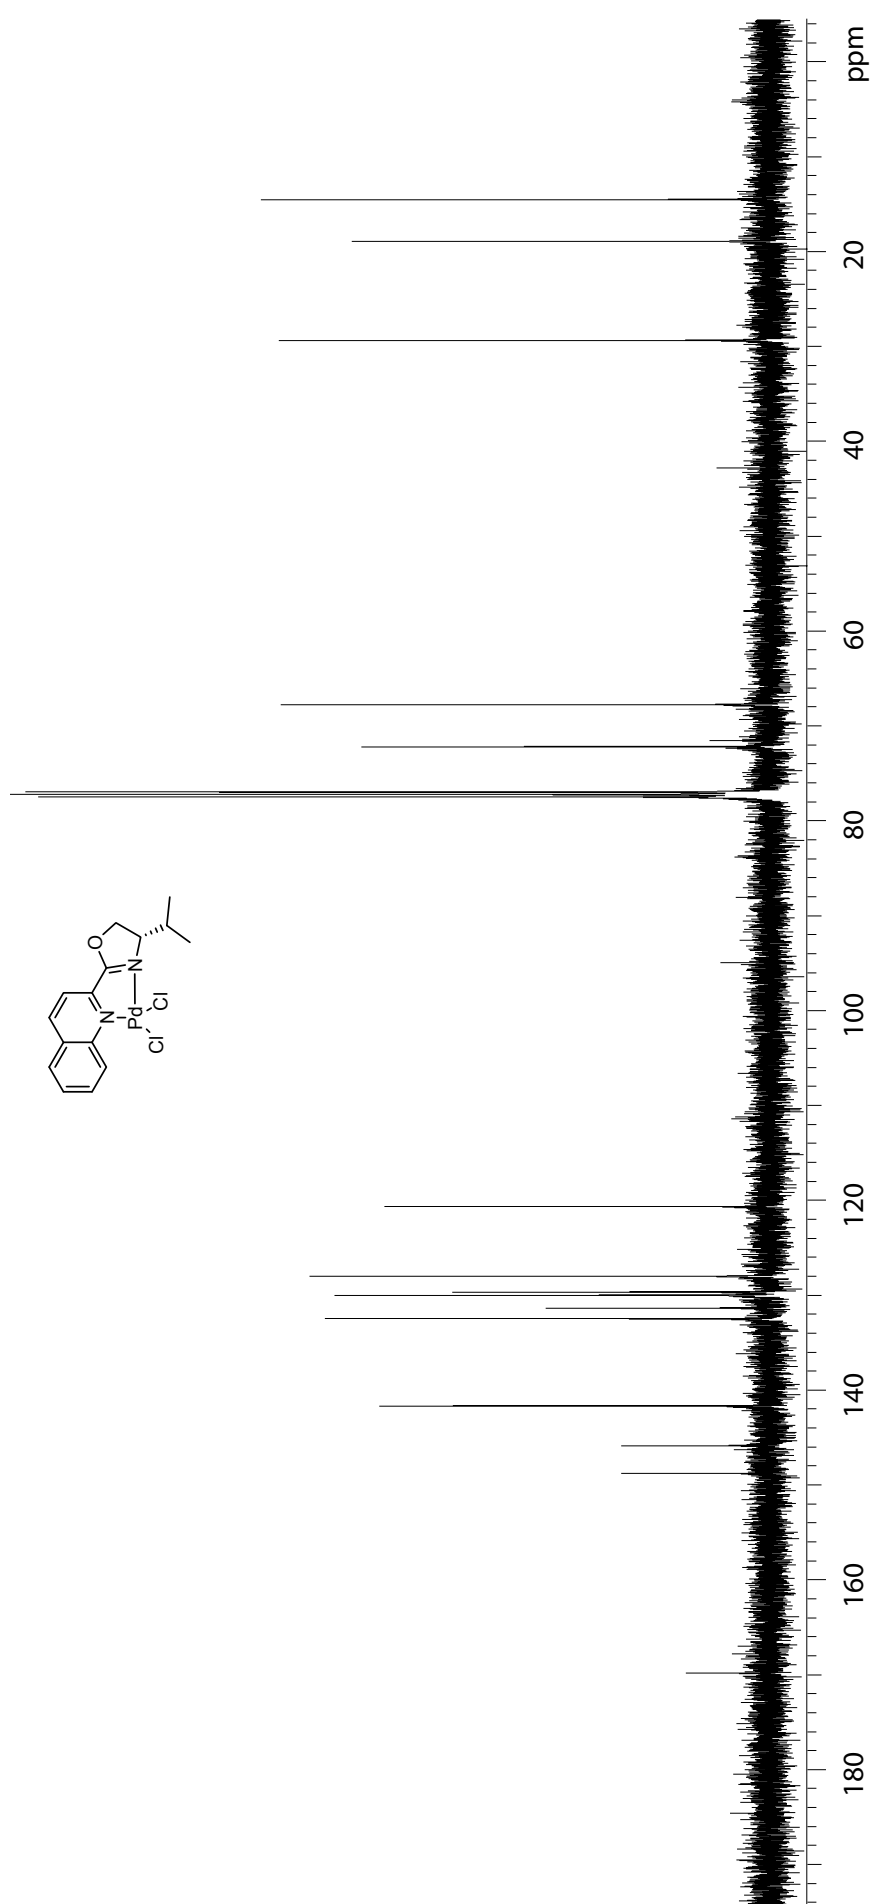

Supplement: NIHMS158995-supplement-1_si_001.pdf [file NIHMS158995-supplement-1_si_001.pdf]
